# Supplementary material for: A supramolecular ladder polymer prepared by hydrogen bonding-mediated self-assembly of a metallomacrocycle
Source: Royal Society of Chemistry journal article supplement (doi:10.1039/c4cc08817d), 2014-12-22

## Supporting Information

### **A Supramolecular Ladder Polymer by Hydrogen Bonding-Mediated Self-Assembly of a Metallomacrocycle**

Chun-Fai Ng and Hak-Fun Chow\*

Department of Chemistry and Institute of Molecular Functional Materials, UGC-AoE, The Chinese University of Hong Kong, Shatin, Hong Kong SAR

Email address: [hfchow@cuhk.edu.hk](mailto:hfchow@cuhk.edu.hk)

## Table of content

|      |                                                                                                                                                      |     |
|------|------------------------------------------------------------------------------------------------------------------------------------------------------|-----|
| 1.   | Synthesis                                                                                                                                            | S4  |
| 1.1. | General                                                                                                                                              | S4  |
| 1.2. | Synthesis of DADA quadruple H-bonding array <b>2</b>                                                                                                 | S5  |
| 1.3. | Synthesis of supramolecular ladder polymer <b>1</b>                                                                                                  | S13 |
| 1.4. | Synthesis of DADA quadruple H-bonding analog <b>2</b> ( $R_1 = R_2 = \text{Me}$ ) for X-ray crystallographic analysis                                | S16 |
| 1.5. | Attempted synthesis of diacetylene-linked macrocycle <b>5</b>                                                                                        | S21 |
| 2.   | $^1\text{H}$ -, $^{31}\text{P}$ -NMR spectroscopic characterization and 2D NMR experiments of compounds <b>1</b> , <b>2</b> , <b>3</b> and <b>4</b>  | S23 |
| 2.1. | $^1\text{H}$ -NMR spectra of supramolecular ladder polymer <b>1</b> in the presence of different amount of $\text{CD}_3\text{OH}$ in $\text{CDCl}_3$ | S23 |
| 2.2. | $^{31}\text{P}$ -NMR spectra of supramolecular polymer <b>3</b> , <b>4</b> and supramolecular ladder polymer <b>1</b>                                | S24 |
| 2.3. | 2D ROESY spectra of dimer <b>2</b> , supramolecular ladder polymer <b>1</b> and supramolecular polymer <b>3</b>                                      | S25 |
| 3.   | Determination of dimerization $K_{\text{dim}}$ and association constants $K_{\text{ass}}$                                                            | S27 |
| 3.1. | Association models                                                                                                                                   | S27 |
| 3.2. | $K_{\text{dim}}$ of dimer <b>2</b> in $\text{CDCl}_3$                                                                                                | S28 |
| 3.3. | $K_{\text{dim}}$ of dimer <b>2</b> in 2% $\text{CD}_3\text{OH}/\text{CDCl}_3$                                                                        | S29 |
| 3.4. | $K_{\text{ass}}$ of supramolecular polymer <b>3</b> in 2% $\text{CD}_3\text{OH}/\text{CDCl}_3$                                                       | S31 |
| 3.5. | $K_{\text{ass}}$ of supramolecular ladder polymer <b>1</b> in 2% $\text{CD}_3\text{OH}/\text{CDCl}_3$                                                | S32 |
| 3.6. | Estimation of DP for supramolecular ladder polymer <b>1</b>                                                                                          | S33 |
| 4.   | Size exclusion chromatography                                                                                                                        | S34 |
| 5.   | Differential scanning calorimetry                                                                                                                    | S35 |
| 6.   | Viscosity measurements                                                                                                                               | S36 |
| 7.   | Dynamic light scattering experiments                                                                                                                 | S37 |

|     |                                                                          |     |
|-----|--------------------------------------------------------------------------|-----|
| 8.  | Scanning electron microscopy                                             | S38 |
| 9.  | UV spectroscopy                                                          | S39 |
| 10. | X-ray crystal structure of compound <b>2</b> ( $R_1 = R_2 = \text{Me}$ ) | S40 |
| 11. | List of NMR and MS spectra                                               | S41 |

## Synthesis

1.1 General. All reagents were purchased from commercial suppliers and used without further purification. Tetrahydrofuran (THF) was freshly distilled from sodium/benzophenone ketyl under nitrogen before use. CH<sub>2</sub>Cl<sub>2</sub> was freshly distilled from CaH<sub>2</sub>. Dimethylformamide (DMF) and diisopropylamine (DIPA) were dried with MgSO<sub>4</sub> and distilled prior to use. All reactions were carried out under N<sub>2</sub> atmosphere unless otherwise stated. All reactions were monitored by thin layer chromatographic analysis on pre-coated silica gel plates, which were visualized by UV lamp at 254 or 365 nm and/or stained using 5% (w/v) dodecamolybdophosphoric acid in ethanol followed by heating. Flash column chromatography was performed on glass column of silica gel (230–400 mesh) and solvent ratios were expressed in volume to volume.

<sup>1</sup>H, <sup>13</sup>C, <sup>31</sup>P, COSY, HSQC and ROESY NMR spectra for structural characterization were recorded either on a 400 MHz nuclear magnetic resonance spectrometer (<sup>1</sup>H: 400 MHz; <sup>13</sup>C: 100 MHz; <sup>31</sup>P: 162 MHz) or a 700 MHz nuclear magnetic resonance spectrometer (<sup>1</sup>H: 700 MHz; <sup>13</sup>C: 176 MHz) as specified. <sup>1</sup>H NMR spectra for concentration dependent studies were recorded on a 700 MHz nuclear magnetic resonance spectrometer. Unless otherwise stated, all NMR measurements were conducted in CDCl<sub>3</sub> at 25 °C. Chemical shifts were reported as parts per million in δ scale using solvent residual peak as internal standard for <sup>1</sup>H and <sup>13</sup>C NMR, whereas the signal of PPh<sub>3</sub> was used as external standard for <sup>31</sup>P NMR spectroscopy. Tetramethylsilane was used as an internal standard for mixed solvent system. Coupling constants (*J*) were reported in hertz. All mass spectra were obtained on a double focusing sector mass spectrometer using electron spray ionization (ESI) technique. The reported molecular mass (*m/z*) values were monoisotopic mass unless otherwise stated. Melting points were measured on a digital melting point apparatus and were uncorrected.

1.2 Synthesis of DADA quadruple H-bonding array **2** – The synthetic scheme of compound **2** is shown in Scheme S1.

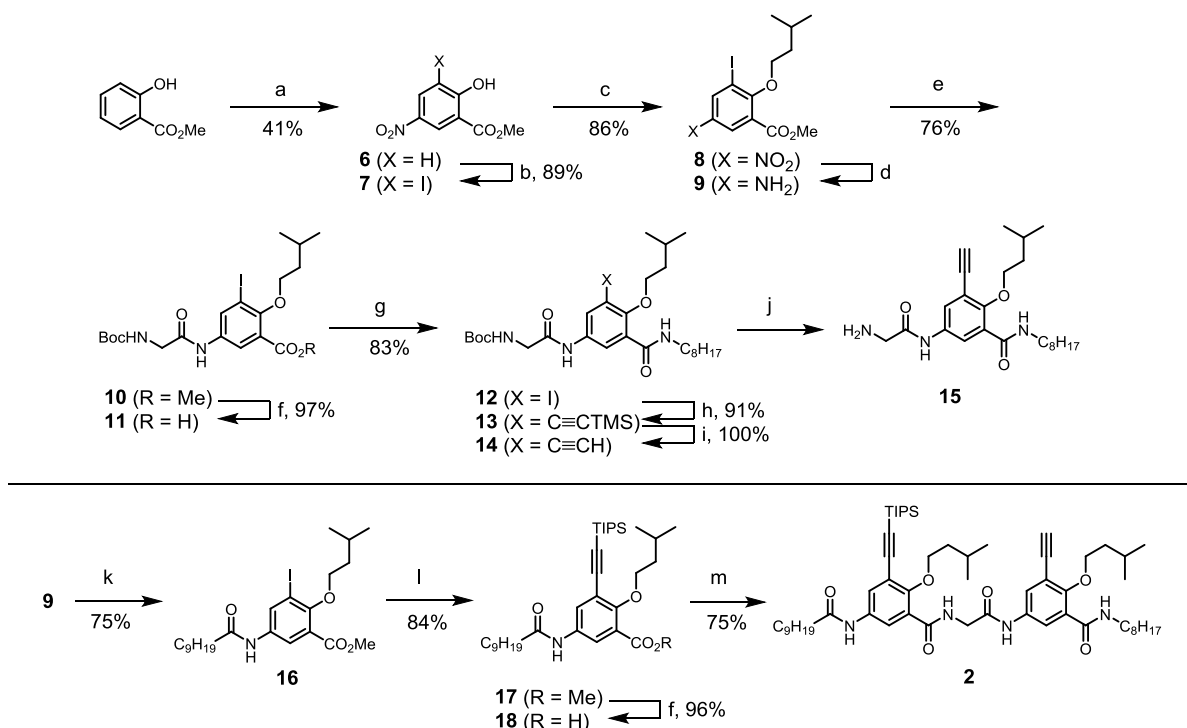

**Scheme S1.** Reagent and conditions: (a) conc. HNO<sub>3</sub>, CH<sub>3</sub>CO<sub>2</sub>H, 12 h; (b) Ag<sub>2</sub>SO<sub>4</sub>, I<sub>2</sub>, CH<sub>3</sub>OH; 3 h; (c) isoamyl bromide, K<sub>2</sub>CO<sub>3</sub>, DMF, 24 h; (d) Na<sub>2</sub>S<sub>2</sub>O<sub>4</sub>, THF, H<sub>2</sub>O, 2 h; (e) Boc-Gly-OH, EDCl, HOBt, CH<sub>2</sub>Cl<sub>2</sub>, 30 min; then compound **9**, CH<sub>2</sub>Cl<sub>2</sub>, 12 h; (f) KOH, THF, H<sub>2</sub>O, 12 h; (g) EDCl, HOBt, CH<sub>2</sub>Cl<sub>2</sub>, 30 min, then *n*-octylamine, CH<sub>2</sub>Cl<sub>2</sub>, 12 h; (h) TMS-C≡CH, PdCl<sub>2</sub>(PPh<sub>3</sub>)<sub>2</sub>, cat. CuI, Et<sub>3</sub>N, THF, 50 °C, 12 h; (i) TBAF, THF, 10 min; (j) TFA, CH<sub>2</sub>Cl<sub>2</sub>, 1 h; (k) C<sub>9</sub>H<sub>19</sub>CO<sub>2</sub>H, EDCl, HOBt, CH<sub>2</sub>Cl<sub>2</sub>, 30 min, then compound **9**, CH<sub>2</sub>Cl<sub>2</sub>, 12 h; (l) TIPS-C≡CH, PdCl<sub>2</sub>(PPh<sub>3</sub>)<sub>2</sub>, cat. CuI, Et<sub>3</sub>N, THF, 50 °C, 12 h; (m) EDCl, HOBt, CH<sub>2</sub>Cl<sub>2</sub>, 30 min, then compound **15**, CH<sub>2</sub>Cl<sub>2</sub>, 12 h.

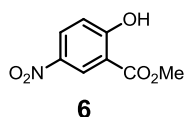

**Compound 6.**<sup>[S1]</sup> A mixture of methyl salicylate (10.10 g, 66.38 mmol), glacial acetic acid (30 mL) and concentrated nitric acid (10 mL) were stirred at 25 °C for 12 h. The reaction mixture was then concentrated under reduced pressure and subjected to flash column chromatography (hexane/EtOAc = 15/1) to afford compound **6** (5.37 g, 27.22 mmol, 41%) as a white solid. M.p.: 117–118 °C; *R*<sub>f</sub>: 0.47 (hexane/EtOAc = 6/1); <sup>1</sup>H NMR: 11.41 (s, OH, 1 H), 8.75 (d, *J* = 2.7, ArH, 1 H), 8.30 (dd, *J* = 9.2, 2.7, ArH, 1 H), 7.06 (d, *J* = 9.2, ArH, 1 H), 4.02 (s, CO<sub>2</sub>CH<sub>3</sub>, 3 H); <sup>13</sup>C NMR: 169.4, 166.3, 140.1, 130.6, 126.7, 118.7, 112.2, 53.2; *m/z* (ESI) 220 (M + Na<sup>+</sup>, 100%), HRMS (ESI) calcd for C<sub>8</sub>H<sub>7</sub>NO<sub>5</sub> + Na<sup>+</sup>: 220.0216, found: 220.0212.

[S1] N. Y. Mok, J. Chadwick, K. A. B. Kellett, N. M. Hooper, A. P. Johnson, C. W. G. Fishwick, *Bioorg. Med. Chem. Lett.* **2009**, *19*, 6770.

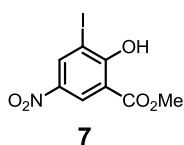

**Compound 7.** Silver sulfate (1.91 g, 6.12 mmol) and iodine (1.42 g, 5.58 mmol) were added to a solution of **6** (1.10 g, 5.58 mmol) in methanol (50 mL). The reaction mixture was stirred at 25 °C for 3 h. The reaction mixture was filtered and washed with methanol. The filtrate was evaporated *in vacuo* to give a crude yellow solid which was purified by recrystallization from hexane and EtOAc to give compound **7** (1.60 g, 4.97 mmol, 89%) as a pale yellow needle crystal. M.p.: 148–149 °C;  $R_f$ : 0.40 (hexane/EtOAc = 6/1);  $^1\text{H NMR}$ : 12.29 (s, OH, 1 H), 8.77 (d,  $J = 2.8$ , ArH, 1 H), 8.75 (d,  $J = 2.8$ , ArH, 1 H), 4.05 (s,  $\text{CO}_2\text{CH}_3$ , 3 H);  $^{13}\text{C NMR}$ : 169.0, 165.1, 140.5, 139.7, 126.3, 111.5, 85.3, 53.8;  $m/z$  (ESI) 324 ( $\text{M} + \text{H}^+$ , 100%). HRMS calcd for  $\text{C}_8\text{H}_6\text{INO}_5 + \text{H}^+$ : 323.9363, found: 323.9363.

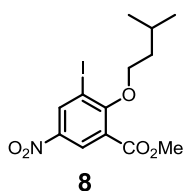

**Compound 8.** A mixture of 1-bromo-3-methylbutane (0.51 g, 3.41 mmol), compound **7** (1.00 g, 3.10 mmol) and potassium carbonate (1.07 g, 7.74 mmol) was stirred in dry DMF (50 mL) at 80 °C for 24 h. The reaction was then cooled to 25 °C and DMF was evaporated *in vacuo*. The yellow residue was diluted with EtOAc (50 mL) and the organic phase was washed with saturated  $\text{Na}_2\text{CO}_3$  followed by brine, dried ( $\text{MgSO}_4$ ) and filtered. The filtrate was concentrated *in vacuo* and the residue purified by flash chromatography (hexane/EtOAc = 10/1) to afford the target compound **8** (1.05 g, 2.66 mmol, 86%) as a pale yellow oil.  $R_f$ : 0.60 (hexane/EtOAc = 6/1);  $^1\text{H NMR}$ : 8.79 (d,  $J = 2.8$ , ArH, 1 H), 8.65 (d,  $J = 2.8$ , ArH, 1 H), 4.10 (t,  $J = 6.6$ ,  $\text{OCH}_2$ , 2 H), 3.97 (s,  $\text{CO}_2\text{CH}_3$ , 3 H), 1.96–1.86 (m,  $(\text{CH}_3)_2\text{CH}$ , 1 H), 1.82–1.77 (m,  $\text{OCH}_2\text{CH}_2$ , 2 H), 0.99 (d,  $J = 6.6$ ,  $(\text{CH}_3)_2\text{C}$ , 6 H);  $^{13}\text{C NMR}$ : 163.8, 163.5, 143.2, 137.6, 127.3, 124.9, 94.1, 74.9, 53.0, 38.8, 24.8, 22.6;  $m/z$  (ESI) 416 ( $\text{M} + \text{Na}^+$ , 100%); HRMS (ESI) calcd for  $\text{C}_{13}\text{H}_{16}\text{INO}_5 + \text{Na}^+$ : 415.9965, found: 415.9969.

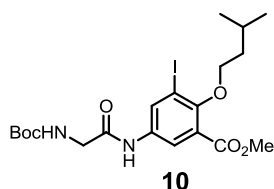

**Compound 10.**<sup>[S2]</sup> Compound **8** (0.21 g, 0.53 mmol) was added to a solution of Na<sub>2</sub>S<sub>2</sub>O<sub>4</sub> (0.93 g, 5.34 mmol) in THF (20 mL) and H<sub>2</sub>O (20 mL). The reaction mixture was stirred at 25 °C for 2 h. The solvent was evaporated *in vacuo* and the residue extracted with EtOAc (3 × 50 mL). The organic phase was washed with brine, dried (MgSO<sub>4</sub>), filtered and the solvent evaporated to give the crude amine **9** which was used in the next step without further purification.

1-[3-(Dimethylamino)propyl]-3-ethylcarbodiimide methiodide (EDCI) (0.18 g, 0.64 mmol) and 1-hydroxybenzotriazole (HOBT) (87 mg, 0.64 mmol) were added to a solution of Boc-glycine (0.10 g, 0.59 mmol) in CH<sub>2</sub>Cl<sub>2</sub> (30 mL). After 30 min, a solution of the crude amine **9** in CH<sub>2</sub>Cl<sub>2</sub> (10 mL) was then added and the reaction mixture was stirred at 25 °C for 12 h. The solvent was evaporated *in vacuo* and the residue purified by flash chromatography (CHCl<sub>3</sub>/CH<sub>3</sub>OH/Et<sub>3</sub>N = 250/10/1) to afford compound **10** (0.21 g, 0.41 mmol, 76% in 2 steps) as a white solid. M.p.: 144–145 °C; *R*<sub>f</sub>: 0.27 (CHCl<sub>3</sub>/CH<sub>3</sub>OH/Et<sub>3</sub>N 200/10/1); <sup>1</sup>H NMR: 8.51 (br s, NH, 1 H), 8.22 (s, ArH, 1 H), 7.85 (d, *J* = 2.4, ArH, 1 H), 5.36 (br s, *NHBoc*, 1 H), 3.95–3.92 (m, 4 H), 3.89 (s, CO<sub>2</sub>CH<sub>3</sub>, 3 H), 1.93–1.71 (m, 3 H), 1.47 (s, C(CH<sub>3</sub>)<sub>3</sub>, 9 H), 0.97 (d, *J* = 6.6, (CH<sub>3</sub>)<sub>2</sub>C, 6 H); <sup>13</sup>C NMR: 168.1, 165.5, 156.7, 154.9, 134.6, 134.4, 125.2, 123.3, 94.4, 80.8, 74.1, 52.6, 45.2, 38.9, 28.4, 24.9, 22.9; *m/z* (ESI) 543 (M + Na<sup>+</sup>, 100%); HRMS (ESI) calcd for C<sub>20</sub>H<sub>29</sub>IN<sub>2</sub>O<sub>6</sub> + Na<sup>+</sup>: 543.0963, found: 543.0959; Anal. C<sub>20</sub>H<sub>29</sub>IN<sub>2</sub>O<sub>6</sub> requires C, 46.16; H, 5.62; N, 5.38%; found: C, 46.15; H, 5.57; N, 5.34%.

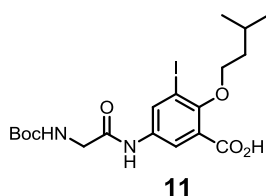

**Compound 11.** A mixture of compound **10** (0.23 g, 0.44 mmol) and aqueous KOH solution (2.5 M, 10 mL) in THF (30 mL) was stirred at 25 °C for 12 h. The reaction mixture was concentrated *in vacuo* and acidified with saturated NH<sub>4</sub>Cl solution (50 mL). The mixture was then extracted with EtOAc (3 × 50 mL) and the combined extracts were washed with brine, dried (MgSO<sub>4</sub>), filtered and evaporated *in vacuo* to give a pale yellow solid which was purified

---

[S2] J. M. Khurana, S. Singh, *J. Indian Chem. Soc.* **1996**, 73, 487.

by recrystallization from hexane and EtOAc to afford the target compound **11** (0.22 g, 0.43 mmol, 97%) as a white solid. M.p.: 161–162 °C;  $R_f$ : 0.10 (hexane/EtOAc = 1/1);  $^1\text{H}$  NMR ( $\text{CD}_3\text{OH}$ ):  $\text{CO}_2\text{H}$  signal was too broad to be observed, 9.91 (br s, NH, 1 H), 8.21 (br s, ArH, 1 H), 7.79 (br s, ArH, 1 H), 6.86 (br s,  $\text{NHBoc}$ , 1 H), 3.98 (t,  $J = 6.1$ ,  $\text{OCH}_2$ , 2 H), 3.86 (d,  $J = 4.8$ ,  $\text{CH}_2\text{NHBoc}$ , 2 H), 1.89–1.84 (m,  $(\text{CH}_3)_2\text{CH}$ , 1 H), 1.73–1.70 (m,  $\text{OCH}_2\text{CH}_2$ , 2 H), 1.44 (s,  $\text{C}(\text{CH}_3)_3$ , 9 H), 0.96 (d,  $J = 6.5$ ,  $(\text{CH}_3)_2\text{C}$ , 6 H);  $^{13}\text{C}$  NMR ( $\text{CD}_3\text{OH}$ ): 170.6, 170.2, 158.4, 154.6, 136.2, 134.0, 130.0, 123.3, 93.9, 80.6, 74.5, 45.0, 39.9, 28.6, 25.8, 23.0;  $m/z$  (ESI) 529 ( $\text{M} + \text{Na}^+$ , 100%); HRMS (ESI) calcd for  $\text{C}_{19}\text{H}_{27}\text{IN}_2\text{O}_6 + \text{Na}^+$ : 529.0806, found: 529.0804.

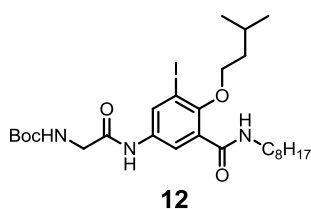

**Compound 12.** EDCI (0.16 g, 0.54 mmol) and HOBt (71 mg, 0.52 mmol) were added to a solution of compound **11** (0.24 g, 0.47 mmol) in  $\text{CH}_2\text{Cl}_2$  (30 mL) and stirred at 25 °C. After 30 min, octylamine (0.12 g, 0.95 mmol) was added and the reaction mixture was stirred at 25 °C for 12 h. The solvent was evaporated *in vacuo* and the residue purified by flash chromatography (hexane/EtOAc/ $\text{Et}_3\text{N}$  = 100/100/1) to afford compound **12** (0.24 g, 0.39 mmol, 83%) as a white solid. M.p.: 138–139 °C;  $R_f$ : 0.67 (hexane/EtOAc/ $\text{Et}_3\text{N}$  = 200/100/1);  $^1\text{H}$  NMR: 8.58 (d,  $J = 2.6$ , ArH, 1 H), 8.47 (br s, NH, 1 H), 7.76 (d,  $J = 2.7$ , ArH, 1 H), 7.73 (t,  $J = 5.2$ , NH, 1 H), 5.25 (br s,  $\text{NHBoc}$ , 1 H), 3.94 (d,  $J = 5.9$ ,  $\text{CH}_2\text{NHBoc}$ , 2 H), 3.90 (t,  $J = 7.0$ ,  $\text{OCH}_2$ , 2 H), 3.45 (q,  $J = 7.0$ ,  $\text{CONHCH}_2$ , 2 H), 1.86–1.74 (m, 3 H), 1.63–1.58 (m, 2 H), 1.48 (s,  $\text{C}(\text{CH}_3)_3$ , 9 H), 1.38–1.27 (m, 10 H), 0.98 (d,  $J = 6.4$ ,  $\text{CH}(\text{CH}_3)_2$ , 6 H), 0.88 (t,  $J = 7.0$ ,  $\text{CH}_3$ , 3 H);  $^{13}\text{C}$  NMR: 168.3, 164.4, 156.4, 152.6, 135.7, 133.9, 127.6, 122.9, 93.2, 80.3, 74.6, 45.0, 40.3, 39.0, 31.9, 29.6, 29.4, 29.3, 28.4, 27.2, 25.1, 22.9, 22.7, 14.2;  $m/z$  (ESI) 640 ( $\text{M} + \text{Na}^+$ , 100%); HRMS (ESI) calcd for  $\text{C}_{27}\text{H}_{44}\text{IN}_3\text{O}_5 + \text{Na}^+$ : 640.2218, found: 640.2227; Anal.  $\text{C}_{27}\text{H}_{44}\text{IN}_3\text{O}_5$  requires C, 52.51; H, 7.18; N, 6.80%; found: C, 52.52; H, 7.04; N, 6.71%.



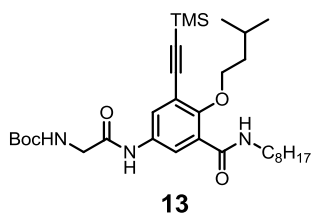

**Compound 13.**<sup>[S3]</sup> A mixture of compound **12** (0.21 g, 0.34 mmol), trimethylsilylacetylene (0.24 mL, 1.70 mmol), CuI (7 mg, 34.0  $\mu$ mol), Pd(PPh<sub>3</sub>)<sub>2</sub>Cl<sub>2</sub> (24 mg, 34.0  $\mu$ mol) and Et<sub>3</sub>N (0.5 mL) in dry THF (20 mL) was frozen in a sealed tube under liquid N<sub>2</sub> and degassed with N<sub>2</sub> (3  $\times$ ). The mixture was then stirred at 50 °C for 12 h. The reaction mixture was filtered through a short pad of Celite and washed with Et<sub>2</sub>O (20 mL). The filtrate was concentrated *in vacuo* and the residue purified by flash chromatography (hexane/EtOAc/Et<sub>3</sub>N = 200/100/1) to afford compound **13** (0.18 g, 0.31 mmol, 91%) as a white solid. M.p.: 105–106 °C; *R*<sub>f</sub>: 0.67 (hexane/EtOAc/Et<sub>3</sub>N = 200/100/1); <sup>1</sup>H NMR: 8.62 (br s, NH, 1 H), 8.26 (d, *J* = 2.8, ArH, 1 H), 8.05 (t, *J* = 5.2, NH, 1 H), 7.80 (d, *J* = 2.8, ArH, 1 H), 5.31 (br s, *NHBoc*, 1 H), 4.16 (t, *J* = 7.0, OCH<sub>2</sub>, 2 H), 3.96 (br s, CH<sub>2</sub>*NHBoc*, 2 H), 3.44 (q, *J* = 6.9, CONHCH<sub>2</sub>, 2 H), 1.82–1.71 (m, 3 H), 1.62–1.55 (m, 2 H), 1.47 (s, C(CH<sub>3</sub>)<sub>3</sub>, 9 H), 1.37–1.27 (m, 10 H), 0.97 (d, *J* = 6.3, CH(CH<sub>3</sub>)<sub>2</sub>, 6 H), 0.87 (t, *J* = 7.0, CH<sub>3</sub>, 3 H), 0.26 (s, (CH<sub>3</sub>)<sub>3</sub>Si, 9 H); <sup>13</sup>C NMR: 168.3, 164.6, 156.3, 154.8, 134.2, 128.9, 126.7, 123.0, 118.6, 100.4, 100.2, 80.1, 74.3, 44.9, 40.2, 39.1, 31.9, 29.5, 29.4, 29.3, 28.4, 27.2, 25.2, 22.8, 22.7, 14.2, –0.1; *m/z* (ESI) 610 (M + Na<sup>+</sup>, 100%); HRMS (ESI) calcd for C<sub>32</sub>H<sub>53</sub>N<sub>3</sub>O<sub>5</sub>Si + Na<sup>+</sup>: 610.3647, found: 610.3647; Anal. C<sub>32</sub>H<sub>53</sub>N<sub>3</sub>O<sub>5</sub>Si requires C, 65.38; H, 9.09; N, 7.14%; found: C, 65.50; H, 9.21; N, 7.09%.

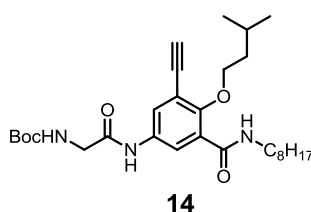

**Compound 14.** A mixture of tetrabutylammonium fluoride (TBAF) in THF (1 M, 0.4 mL) and compound **13** (0.18 g, 0.31 mmol) in THF (20 mL) was stirred at 25 °C for 10 min. The solvent was evaporated *in vacuo* and the residue purified by flash chromatography (hexane/EtOAc/Et<sub>3</sub>N = 200/100/1 gradient to EtOAc/Et<sub>3</sub>N = 100/1) to afford compound **14** (0.15 g, 0.31 mmol, 100%) as a pale yellow foam. *R*<sub>f</sub>: 0.57 (hexane/EtOAc/Et<sub>3</sub>N = 200/100/1); <sup>1</sup>H NMR: 8.80 (br s, *NHBoc*, 1 H), 8.27 (d, *J* = 2.8, ArH, 1 H), 8.03 (t, *J* = 5.2, NH, 1 H), 7.86

[S3] K. Sonogashira, Y. Tohda, N. Hagihara, *Tetrahedron Lett.* **1975**, 50, 4467.

(d,  $J = 2.8$ , ArH, 1 H), 5.41 (br s, *NHBoc*, 1 H), 4.15 (t,  $J = 7.0$ , *OCH*<sub>2</sub>, 2 H), 3.98 (d,  $J = 5.1$ , *CH*<sub>2</sub>*NHBoc*, 2 H), 3.44 (q,  $J = 7.0$ , *CONHCH*<sub>2</sub>, 2 H), 3.32 (s, *C*≡*CH*, 1 H), 1.86–1.69 (m, 3 H), 1.63–1.55 (m, 2 H), 1.46 (s, *C*(*CH*<sub>3</sub>)<sub>3</sub>, 9 H), 1.37–1.24 (m, 10 H), 0.96 (d,  $J = 6.4$ , *CH*(*CH*<sub>3</sub>)<sub>2</sub>, 6 H), 0.87 (t,  $J = 7.0$ , *CH*<sub>3</sub>, 3 H); <sup>13</sup>C NMR: 168.4, 164.5, 156.3, 154.9, 134.3, 128.8, 126.8, 123.3, 117.4, 82.5, 79.8, 79.3, 74.3, 44.8, 40.1, 39.0, 31.8, 29.5, 29.3, 29.2, 28.3, 27.2, 25.0, 22.7, 22.6, 14.1; *m/z* (ESI) 538 (*M* + *Na*<sup>+</sup>, 100%); HRMS (ESI) calcd for C<sub>29</sub>H<sub>45</sub>N<sub>3</sub>O<sub>5</sub> + *Na*<sup>+</sup>: 538.3251, found: 538.3248.

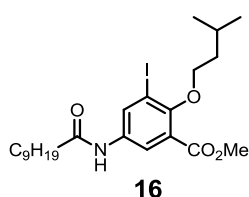

**Compound 16.** Compound **8** (0.34 g, 0.86 mmol) was added to a solution of Na<sub>2</sub>S<sub>2</sub>O<sub>4</sub> (1.51 g, 8.65 mmol) in a mixture of THF (20 mL) and H<sub>2</sub>O (20 mL). The reaction mixture was stirred at 25 °C for 2 h. The solvent was evaporated *in vacuo* and the residue extracted with EtOAc (3 × 50 mL). The organic phase was washed with brine, dried (MgSO<sub>4</sub>) and filtered. The solvent was evaporated and the crude amine **9** was used in the next step without further purification. EDCI (0.28 g, 0.95 mmol) and HOBT (0.13 g, 0.95 mmol) were added to a solution of decanoic acid (0.16 g, 0.95 mmol) in CH<sub>2</sub>Cl<sub>2</sub> (30 mL). After 30 min, a solution of the crude amine **9** in CH<sub>2</sub>Cl<sub>2</sub> (10 mL) was then added and the reaction mixture stirred at 25 °C for 12 h. The solvent was evaporated *in vacuo* and the residue purified by flash chromatography (hexane/EtOAc = 3/1) to afford compound **16** (0.34 g, 0.65 mmol, 75% in 2 steps) as a white solid. M.p.: 59–60 °C; *R*<sub>f</sub>: 0.33 (hexane/EtOAc = 6/1); <sup>1</sup>H NMR: 8.25 (d,  $J = 2.5$ , ArH, 1 H), 7.83 (d,  $J = 2.6$ , ArH, 1 H), 7.42 (br s, NH, 1 H), 3.93 (t,  $J = 6.8$ , *OCH*<sub>2</sub>, 2 H), 3.88 (s, *CO*<sub>2</sub>*CH*<sub>3</sub>, 3 H), 2.33 (t,  $J = 7.5$ , *CH*<sub>2</sub>*CONH*, 2 H), 1.92–1.82 (m, (*CH*<sub>3</sub>)<sub>2</sub>*CH*, 1 H), 1.77–1.65 (m, 4 H), 1.30–1.25 (m, 12 H), 0.97 (d,  $J = 6.6$ , *CH*(*CH*<sub>3</sub>)<sub>2</sub>, 6 H), 0.87 (t,  $J = 6.6$ , *CH*<sub>3</sub>, 3 H); <sup>13</sup>C NMR: 172.4, 165.5, 154.6, 135.0, 134.7, 125.0, 123.2, 94.2, 74.0, 52.5, 38.9, 37.4, 31.9, 29.51, 29.47, 29.34, 29.32, 25.6, 24.9, 22.8, 22.7, 14.2; *m/z* (ESI) 540 (*M* + *Na*<sup>+</sup>, 100%); HRMS (ESI) calcd for C<sub>23</sub>H<sub>36</sub>INO<sub>4</sub> + *Na*<sup>+</sup>: 540.1581, found: 540.1577; Anal. C<sub>23</sub>H<sub>36</sub>INO<sub>4</sub> requires C, 53.39; H, 7.01; N, 2.71%; found: C, 53.62; H, 7.40; N, 2.69%.

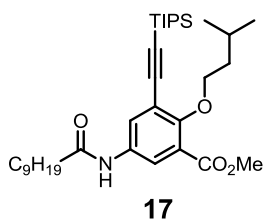

**Compound 17.** A mixture of compound **16** (0.73 g, 1.41 mmol), triisopropylsilylacetylene (0.95 mL, 4.23 mmol), CuI (27 mg, 0.14 mmol), Pd(PPh<sub>3</sub>)<sub>2</sub>Cl<sub>2</sub> (99 mg, 0.14 mmol) and Et<sub>3</sub>N (2 mL) in dry THF (30 mL) was frozen in a sealed tube under liquid N<sub>2</sub> and degassed with N<sub>2</sub> (3 ×). The mixture was then stirred at 50 °C for 12 h. The reaction mixture was filtered through a short pad of Celite and then washed with Et<sub>2</sub>O (20 mL). The filtrate was concentrated *in vacuo* and the residue purified by flash chromatography (hexane/CHCl<sub>3</sub> = 1/3 gradient to CHCl<sub>3</sub>) to afford compound **17** (0.68 g, 1.19 mmol, 84%) as a yellow oil. *R*<sub>f</sub>: 0.30 (hexane/CHCl<sub>3</sub> = 1/3); <sup>1</sup>H NMR: 7.83 (d, *J* = 2.4, ArH, 1 H), 7.80 (d, *J* = 2.5, ArH, 1 H), 7.07 (br s, NH, 1 H), 4.14 (t, *J* = 7.0, OCH<sub>2</sub>, 2 H), 3.88 (s, COCH<sub>3</sub>, 3 H), 2.33 (t, *J* = 7.5, CH<sub>2</sub>CONH, 2 H), 1.81–1.67 (m, 5 H), 1.33–1.25 (m, 12 H), 1.13 (s, (CH<sub>3</sub>)<sub>2</sub>CH + (CH<sub>3</sub>)<sub>2</sub>CH, 21 H), 0.93 (d, *J* = 6.3, CH(CH<sub>3</sub>)<sub>2</sub>, 6 H), 0.87 (t, *J* = 6.4, CH<sub>3</sub>, 3 H); <sup>13</sup>C NMR: 172.4, 165.5, 154.6, 135.0, 134.7, 125.0, 123.2, 94.2, 74.0, 52.5, 38.9, 37.4, 31.9, 29.51, 29.47, 29.33, 29.32, 25.6, 24.9, 22.8, 22.7, 14.2; *m/z* (ESI) 594 (M + Na<sup>+</sup>, 100%); HRMS (ESI) calcd for C<sub>34</sub>H<sub>57</sub>NO<sub>4</sub>Si + Na<sup>+</sup>: 594.3949, found: 594.3951.

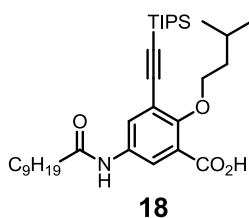

**Compound 18.** A mixture of the ester **17** (0.67 g, 1.17 mmol) in THF (30 mL) and aqueous KOH solution (2.5 M, 10 mL) was stirred at 25 °C for 12 h. The reaction mixture was concentrated *in vacuo* and acidified with saturated NH<sub>4</sub>Cl solution (50 mL). The mixture was extracted with EtOAc (3 × 50 mL) and the combined extracts washed with brine, dried (MgSO<sub>4</sub>), filtered and evaporated *in vacuo* to give the acid **18** (0.63 g, 1.12 mmol, 96%) as a pale yellow solid. M.p.: 104–106 °C; *R*<sub>f</sub>: 0.40 (CHCl<sub>3</sub>/CH<sub>3</sub>OH/Et<sub>3</sub>N = 200/10/1); <sup>1</sup>H NMR: 11.49 (br s, CO<sub>2</sub>H, 1 H), 8.55 (d, *J* = 2.2, ArH, 1 H), 8.28 (s, NH, 1 H), 7.97 (d, *J* = 2.6, ArH, 1 H), 4.49 (t, *J* = 7.1, OCH<sub>2</sub>, 2 H), 2.43 (t, *J* = 7.5, CH<sub>2</sub>CONH, 2 H), 1.78–1.68 (m, 5 H), 1.38–1.25 (m, 12 H), 1.14 (s, (CH<sub>3</sub>)<sub>2</sub>CHSi + (CH<sub>3</sub>)<sub>2</sub>CHSi, 21 H), 0.94 (d, *J* = 6.2, CH(CH<sub>3</sub>)<sub>2</sub>, 6 H), 0.86 (t, *J* = 6.2, CH<sub>3</sub>, 3 H); <sup>13</sup>C NMR: 172.7, 165.8, 154.9, 135.6, 131.3, 123.4, 121.7, 118.3, 101.4, 98.9, 75.5, 38.5, 37.6, 32.0, 29.6, 29.5, 29.40, 29.37, 25.7, 25.2, 22.8, 22.7, 18.8, 14.2,

11.4;  $m/z$  (ESI) 580 ( $M + Na^+$ , 100%); HRMS (ESI) calcd for  $C_{33}H_{55}NO_4Si + Na^+$ : 580.3793, found: 580.3796.

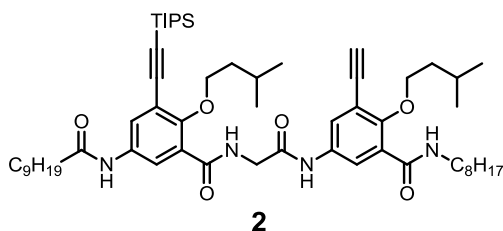

**Compound 2.** A mixture of trifluoroacetic acid (3 mL) and compound **14** (0.27 g, 0.52 mmol) in  $CH_2Cl_2$  (30 mL) was stirred at 25 °C for 1 h. The reaction mixture was then neutralized with saturated  $Na_2CO_3$  solution and extracted with  $CH_2Cl_2$  ( $3 \times 50$  mL). The combined extracts were washed with brine, dried ( $MgSO_4$ ), filtered and evaporated *in vacuo* to give the crude amine **15** which was used for next step without further purification.

EDCI (0.17 g, 0.58 mmol) and HOBt (78 mg, 0.58 mmol) were added to a solution of the acid **18** (0.29 g, 0.52 mmol) in  $CH_2Cl_2$  (30 mL). After 30 min, a solution of the amine **15** in  $CH_2Cl_2$  (10 mL) was then added and the reaction mixture stirred at 25 °C for 12 h. The solvent was evaporated *in vacuo* and the residue was purified by flash chromatography ( $CHCl_3/CH_3OH = 30/1$ ) to afford compound **2** (0.44 g, 0.46 mmol, 87% in 2 steps) as a white solid. M.p.: 195 °C (dec.);  $R_f$ : 0.27 ( $CHCl_3/CH_3OH = 30/1$ );  $^1H$  NMR: 10.24 (s, NH, 1 H), 9.65 (br s, NH, 1 H), 9.54 (br s, NH, 1 H), 8.74 (d,  $J = 2.6$ , ArH, 1 H), 8.60 (d,  $J = 2.5$ , ArH, 1 H), 8.17 (t,  $J = 5.2$ , NH, 1 H), 8.07 (d,  $J = 2.7$ , ArH, 1 H), 7.99 (d,  $J = 2.7$ , ArH, 1 H), 4.61 (d,  $J = 3.5$ ,  $CH_2CONH$ , 2 H), 4.33 (t,  $J = 7.7$ ,  $OCH_2$ , 2 H), 4.19 (t,  $J = 6.9$ ,  $OCH_2$ , 2 H), 3.47 (q,  $J = 6.8$ ,  $CONHCH_2$ , 2 H), 3.35 (s,  $C\equiv CH$ , 1 H), 2.48 (t,  $J = 7.4$ ,  $CH_2CONH$ , 2 H), 1.93–1.57 (m, 10 H), 1.32–1.24 (m, 22 H), 1.16 (s,  $(CH_3)_2CHSi + (CH_3)_2CHSi$ , 21 H), 0.99 (d,  $J = 6.5$ ,  $CH(CH_3)_2$ , 6 H), 0.91–0.85 (m, 12 H);  $^{13}C$  NMR: (some signal overlappings of aliphatic carbon nuclei were observed) 172.5, 166.2, 165.2, 164.9, 155.3, 154.7, 135.1, 135.1, 131.0, 128.7, 126.9, 125.0, 122.7, 122.6, 119.1, 117.9, 102.7, 96.8, 82.7, 79.5, 75.0, 74.6, 45.4, 40.5, 39.2, 38.2, 37.4, 32.0, 31.9, 29.74, 29.69, 29.6, 29.51, 29.47, 29.4, 27.4, 25.7, 25.4, 25.1, 22.83, 22.80, 22.77, 18.9, 14.23, 14.20, 11.5;  $m/z$  (ESI) 978 ( $M + Na^+$ , 100%); HRMS (ESI) calcd for  $C_{57}H_{90}N_4O_6Si + Na^+$ : 977.6522, found: 977.6529; Anal.  $C_{57}H_{90}N_4O_6Si$  requires C, 71.66; H, 9.49; N, 5.86%; found: C, 72.19; H, 9.29; N, 6.05%.

### 1.3 Synthesis of supramolecular ladder polymer **1**

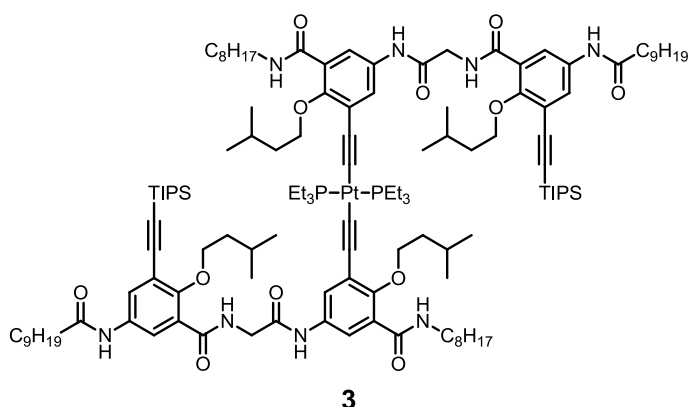

**Compound 3.** A mixture of compound **2** (0.40 g, 0.42 mmol), *trans*-PtCl<sub>2</sub>(PEt<sub>3</sub>)<sub>2</sub> (0.11 g, 0.21 mmol), diisopropylamine (5 mL) in CH<sub>2</sub>Cl<sub>2</sub> (30 mL) was frozen with liquid N<sub>2</sub> and degassed with N<sub>2</sub> (3 ×). The mixture was then stirred for 24 h at 25 °C. The solvent was evaporated *in vacuo* and the residue purified by flash chromatography (CHCl<sub>3</sub>/CH<sub>3</sub>OH = 30/1) to afford compound **3** (0.48 g, 0.21 mmol, 98%) as a pale yellow solid. M.p.: 278 °C (dec.); R<sub>f</sub>: 0.5 (CHCl<sub>3</sub>/CH<sub>3</sub>OH = 20/1); <sup>1</sup>H NMR: 10.10 (br s, NH, 2 H), 9.81 (br s, NH, 2 H), 9.51 (br s, NH, 2 H), 8.60 (s, ArH, 2 H), 8.58 (s, ArH, 2 H), 8.35 (br s, ArH, 2 H), 8.03 (br s, NH, 2 H), 7.84 (br s, ArH, 2 H), 4.62 (br s, CH<sub>2</sub>CONH, 4 H), 4.31 (m, OCH<sub>2</sub>, 8 H), 3.48 (m, CONHCH<sub>2</sub>, 4 H), 2.49 (m, CH<sub>2</sub>CONH, 4 H), 2.18–2.17 (m, P(CH<sub>2</sub>CH<sub>3</sub>)<sub>3</sub>, 12 H), 1.87 (q, *J* = 7.2, OCH<sub>2</sub>CH<sub>2</sub>, 4 H), 1.72–1.61 (m, 16 H), 1.32–1.61 (m, 62 H), 1.15 (s, (CH<sub>3</sub>)<sub>2</sub>CHSi + (CH<sub>3</sub>)<sub>2</sub>CHSi, 42 H), 0.97–0.95 (m, 12 H), 0.89–0.85 (m, 24 H); <sup>13</sup>C NMR: (signal overlapping of acetylenic carbon nuclei was noted) 172.5, 165.9, 165.8, 165.0, 155.3, 153.1, 132.1, 134.7, 130.8, 128.2, 126.2, 125.3, 124.0, 122.8, 118.9, 115.7,<sup>[S4]</sup> 105.0,<sup>[S4]</sup> 102.8, 96.4, 74.8, 73.3, 45.4, 40.3, 39.1, 38.1, 37.3, 32.0, 31.9, 29.7, 29.63, 29.55, 29.5, 29.4, 29.3, 27.3, 25.6, 25.4, 25.3, 22.9, 22.8, 22.7, 18.8, 16.5 (pseudo quint, *J*<sub>C-P</sub> = 17.6), 14.2, 14.1, 11.5, 8.5 (pseudo t, *J*<sub>C-P</sub> = 11.3); <sup>31</sup>P NMR: 12.1 (*J*<sub>Pt-P</sub> = 2369); *m/z* (ESI) 2362 (M + Na<sup>+</sup>, 100%); HRMS (ESI) calcd for C<sub>126</sub>H<sub>208</sub>N<sub>8</sub>O<sub>12</sub>P<sub>2</sub>PtSi<sub>2</sub> + Na<sup>+</sup>: 2362.4491, found: 2362.4487.

[S4] Based on the <sup>13</sup>C NMR spectral data of other Pt-diacetylene compounds, the two acetylenic carbon signals are broad and sometimes difficult to identify, but they appear consistently at δ 115.7 and δ 105.0.

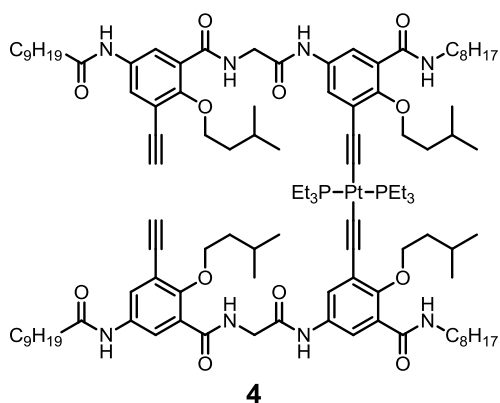

**Compound 4.** A solution of TBAF in THF (1 M, 0.4 mL) was added to a solution of compound **3** (0.28 g, 0.12 mmol) in THF (20 mL). The reaction mixture was stirred at 25 °C for 10 min. The solvent was evaporated *in vacuo* and the residue purified by flash chromatography (CHCl<sub>3</sub>/CH<sub>3</sub>OH = 20/1) to afford compound **4** (0.23 g, 0.11 mmol, 92%) as a pale yellow solid. M.p.: 272 °C (dec.); *R*<sub>f</sub>: 0.29 (CHCl<sub>3</sub>/CH<sub>3</sub>OH = 30/1); <sup>1</sup>H NMR: 10.08 (br s, NH, 2 H), 9.84 (br s, NH, 2 H), 9.49 (br s, NH, 2 H), 8.63 (br s, ArH, 2 H), 8.54 (br s, ArH, 2 H), 8.37 (br s, NH, 2 H), 8.07 (br s, ArH, 2 H), 7.83 (br s, ArH, 2 H), 4.62 (br s, CH<sub>2</sub>CONH, 4 H), 4.26 (m, OCH<sub>2</sub>, 8 H), 3.48 (br s, CONHCH<sub>2</sub>, 4 H), 3.33 (s, C≡CH, 2 H), 2.48 (br s, CH<sub>2</sub>CONH, 4 H), 2.16 (br s, P(CH<sub>2</sub>CH<sub>3</sub>)<sub>3</sub>, 12 H), 1.89–1.26 (m, 82 H), 0.97 (m, 24 H), 0.89–0.85 (m, 12 H); <sup>13</sup>C NMR: 172.5, 166.0, 165.8, 164.8, 155.7, 153.2, 135.3, 134.7, 130.7, 128.1, 126.2, 125.3, 124.1, 123.3, 117.7, 115.9, 105.2, 82.5, 79.8, 74.8, 73.3, 45.4, 40.3, 39.2, 38.4, 37.3, 32.0, 31.9, 29.75, 29.68, 29.6, 29.52, 29.45, 29.4, 27.4, 25.7, 25.4, 25.1, 22.94, 22.88, 22.8, 16.5 (pseudo quint, *J*<sub>C-P</sub> = 17.5), 14.22, 14.19, 8.6; <sup>31</sup>P NMR: 12.2 (*J*<sub>Pt-P</sub> = 2369); *m/z* (ESI) 2049 (M + Na<sup>+</sup>, 50%), 2027 (M<sup>+</sup>, 100%); HRMS (ESI) calcd for C<sub>108</sub>H<sub>168</sub>N<sub>8</sub>O<sub>12</sub>P<sub>2</sub>Pt<sup>+</sup>: 2027.1927, found: 2027.1976.

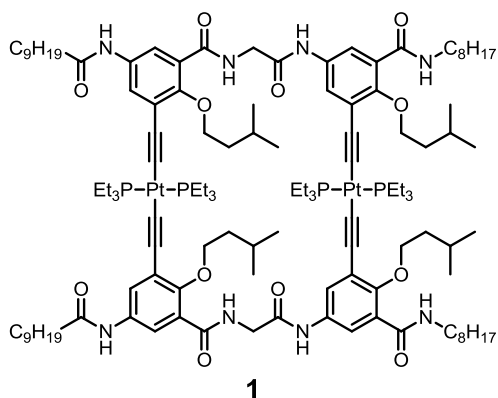

**Compound 1.** A solution of compound **4** (0.12 g, 59.2 μmol), CuI (11 mg, 52 μmol) and diisopropylamine (5 mL) in CH<sub>2</sub>Cl<sub>2</sub> (60 mL) was frozen with liquid N<sub>2</sub> and degassed with N<sub>2</sub>

(3 ×). The mixture was then warmed to 25 °C. A solution of *trans*-PtCl<sub>2</sub>(PEt<sub>3</sub>)<sub>2</sub> (30 mg, 59.2 μmol) in CH<sub>2</sub>Cl<sub>2</sub> (20 mL) was added dropwise over a period of 1 h to the mixture and stirred at 25 °C for 2 d. The solvent was evaporated *in vacuo*. The residue was taken up with CHCl<sub>3</sub>/CH<sub>3</sub>OH (30/1) and filtered through a short pad of silica gel. The filtrate was then concentrated and the crude product was isolated by precipitation in methanol. The crude product was further purified by washing with THF (20 mL × 3) to afford the target metallomacrocycle **1** (90 mg, 36.7 μmol, 62%) as a pale yellow solid. M.p.: 382 °C; R<sub>f</sub>: 0.33 (CHCl<sub>3</sub>/CH<sub>3</sub>OH = 20/1); <sup>1</sup>H NMR (4% CD<sub>3</sub>OH/CDCl<sub>3</sub>):<sup>[S5]</sup> 10.16 (br s, NH, 2 H), 9.78 (br s, NH, 2 H), 9.59 (br s, NH, 2 H), 8.70 (s, ArH, 2 H), 8.37 (br s, NH, 2 H), 8.28 (s, ArH, 2 H), 7.79 (br s, ArH, 4 H), 4.58 (br s, CH<sub>2</sub>CONH, 4 H), 4.38 (br s, OCH<sub>2</sub>, 4 H), 4.31 (br s, OCH<sub>2</sub>, 4 H), 3.48 (br s, CONHCH<sub>2</sub>, 4 H), 2.53 (br s, CH<sub>2</sub>CONH, 4 H), 2.17 (br s, P(CH<sub>2</sub>CH<sub>3</sub>)<sub>3</sub>, 24 H), 1.86–1.16 (m, 100 H), 0.98–0.86 (m, 36 H); <sup>13</sup>C NMR (4% CD<sub>3</sub>OH/CDCl<sub>3</sub>): 172.6, 166.2, 165.9, 165.7, 154.8, 152.8, 135.0, 134.3, 129.4, 127.8, 126.0, 124.8, 123.9, 115.6, 105.2, 73.4, 73.2, 45.3, 40.2, 39.1, 38.1, 37.4, 32.0, 31.9, 29.7, 29.6, 29.6, 29.4, 29.4, 29.3, 27.3, 25.4, 23.0, 22.9, 22.7, 16.7 (pseudo quint, J<sub>P-C</sub> = 17.5), 16.4 (pseudo quint, J<sub>P-C</sub> = 17.6), 14.13, 14.11, 8.5 (pseudo t, J<sub>P-C</sub> = 11.3); <sup>31</sup>P NMR (4% CD<sub>3</sub>OH/CDCl<sub>3</sub>): 12.5 (J<sub>Pt-P</sub> = 2372), 11.9 (J<sub>Pt-P</sub> = 2363); *m/z* (ESI) 2479 (M + Na<sup>+</sup>, 100%); HRMS (ESI) calcd for C<sub>120</sub>H<sub>196</sub>N<sub>8</sub>O<sub>12</sub>P<sub>4</sub>Pt<sub>2</sub> + Na<sup>+</sup>: 2479.3136, found: 2479.3133. Anal. C<sub>120</sub>H<sub>196</sub>N<sub>8</sub>O<sub>12</sub>P<sub>4</sub>Pt<sub>2</sub> requires C, 58.66; H, 8.04; N, 4.56; P, 5.04%; found: C, 57.98; H, 8.34; N, 4.50; P 4.99%.

---

[S5] Significant broadening of <sup>13</sup>C signals, especially the acetylenic ones, was noted. As a result, some signals could not be identified with certainty and were not reported here.

1.4 Synthesis of DADA quadruple H-bonding analog **2** ( $R_1 = R_2 = \text{Me}$ ) for X-ray crystallographic analysis

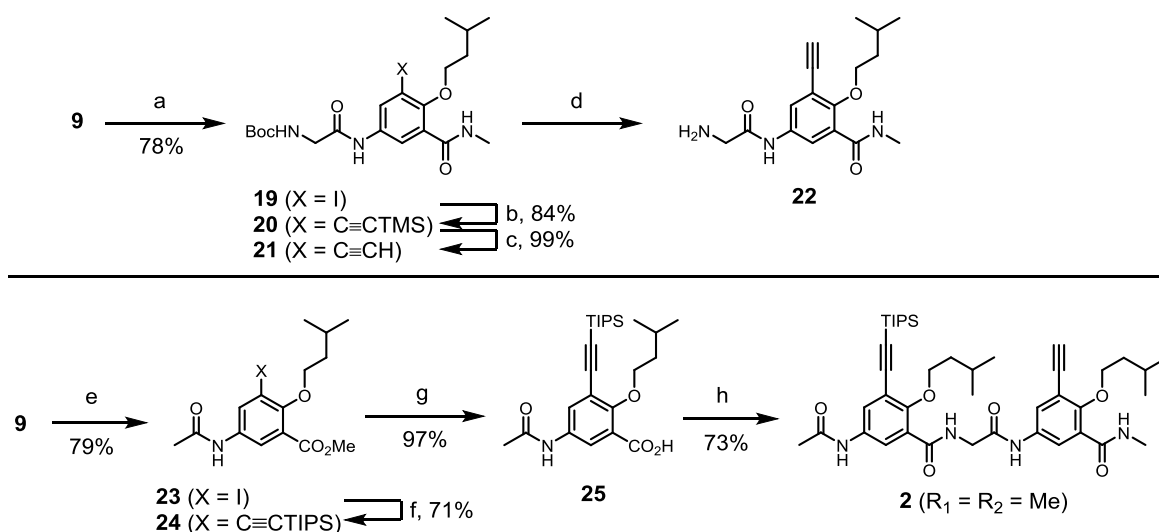

**Scheme S2.** Reagent and conditions: (a) EDCI, HOBT,  $\text{CH}_2\text{Cl}_2$ , 30 min, then  $\text{CH}_3\text{NH}_2\cdot\text{HCl}$ ,  $\text{Et}_3\text{N}$ ,  $\text{CH}_2\text{Cl}_2$ , 12 h; (b)  $\text{TMSC}\equiv\text{CH}$ ,  $\text{PdCl}_2(\text{PPh}_3)_2$ , cat.  $\text{CuI}$ ,  $\text{Et}_3\text{N}$ , THF,  $50^\circ\text{C}$ , 12 h; (c) TBAF, THF, 10 min; (d) TFA,  $\text{CH}_2\text{Cl}_2$ , 1 h; (e)  $\text{Ac}_2\text{O}$ ,  $\text{CH}_2\text{Cl}_2$ , 3 h; (f)  $\text{TIPSC}\equiv\text{CH}$ ,  $\text{PdCl}_2(\text{PPh}_3)_2$ , cat.  $\text{CuI}$ ,  $\text{Et}_3\text{N}$ , THF,  $50^\circ\text{C}$ , 12 h; (g)  $\text{KOH}$ , THF,  $\text{H}_2\text{O}$ , 24 h; (h) EDCI, HOBT,  $\text{CH}_2\text{Cl}_2$ , 30 min, then compound **22**,  $\text{CH}_2\text{Cl}_2$ , 12 h.

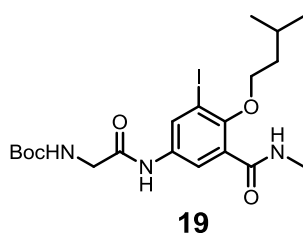

**Compound 19.** EDCI (0.35 g, 1.17 mmol) and HOBT (0.16 g, 1.17 mmol) were added to a solution of compound **9** (0.54 g, 1.07 mmol) in  $\text{CH}_2\text{Cl}_2$  (30 mL) and stirred at  $25^\circ\text{C}$  for 30 min. After 30 min,  $\text{Et}_3\text{N}$  (1 mL) and methylammonium chloride (0.22 g, 3.20 mmol) were added and the reaction mixture was stirred at  $25^\circ\text{C}$  for 12 h. The solvent was evaporated *in vacuo* and the residue purified by flash chromatography ( $\text{CHCl}_3/\text{CH}_3\text{OH}/\text{Et}_3\text{N} = 300/10/1$ ) to afford compound **19** (0.55 g, 0.83 mmol, 78%) as a white solid. M.p.:  $114\text{--}115$ ;  $R_f$ : 0.30 ( $\text{CHCl}_3/\text{CH}_3\text{OH}/\text{Et}_3\text{N} = 300/10/1$ );  $^1\text{H}$  NMR: 9.28 (s, NH, 1 H), 8.50 (s, ArH, 1 H), 7.82 (m, NH, 1 H), 7.79 (d,  $J = 2.5$ , ArH, 1 H), 5.66 (br s,  $\text{NHBoc}$ , 1 H), 3.99 (br s,  $\text{CH}_2\text{NHBoc}$ , 2 H), 3.85 (t,  $J = 6.8$ ,  $\text{OCH}_2$ , 2 H), 3.00 (d,  $J = 4.8$ ,  $\text{CONHCH}_3$ , 3 H), 1.85–1.68 (m, 3 H), 1.42 (s,  $\text{C}(\text{CH}_3)_3$ , 9 H), 0.96 (d,  $J = 6.5$ ,  $\text{CH}(\text{CH}_3)_2$ , 6 H);  $^{13}\text{C}$  NMR: 168.4, 165.4, 156.4, 152.6, 135.7, 133.9, 127.3, 122.7, 93.2, 80.2, 74.4, 44.9, 39.0, 28.4, 26.9, 24.9, 22.8;  $m/z$  (ESI) 542 ( $\text{M} + \text{Na}^+$ , 100%); HRMS (ESI) calcd for  $\text{C}_{20}\text{H}_{30}\text{IN}_3\text{O}_5 + \text{Na}^+$ : 542.1122, found: 542.1127.



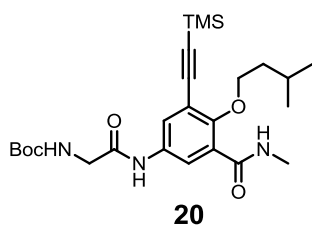

**Compound 20.** A mixture of compound **19** (0.36 g, 0.69 mmol), trimethylsilylacetylene (1.00 mL, 6.93 mmol), CuI (13 mg, 69.3  $\mu$ mol), Pd(PPh<sub>3</sub>)<sub>2</sub>Cl<sub>2</sub> (49 mg, 69.3  $\mu$ mol) and Et<sub>3</sub>N (0.5 mL) in dry THF (20 mL) was frozen in a sealed tube with liquid N<sub>2</sub> and degassed with N<sub>2</sub> (3  $\times$ ). The mixture was stirred at 50 °C for 12 h, filtered through a short pad of Celite and washed with Et<sub>2</sub>O (20 mL). The filtrate was concentrated *in vacuo* and the residue purified by flash chromatography (CHCl<sub>3</sub>/Et<sub>3</sub>N = 100/1 gradient to CHCl<sub>3</sub>/CH<sub>3</sub>OH/Et<sub>3</sub>N = 200/100/1) to give a solid which was further purified by recrystallization from hexane to afford compound **20** (0.28 g, 0.58 mmol, 84%) as an off-white solid. M.p.: 170–171 °C (dec.); *R*<sub>f</sub>: 0.37 (CHCl<sub>3</sub>/CH<sub>3</sub>OH/Et<sub>3</sub>N = 200/10/1); <sup>1</sup>H NMR: 9.32 (br s, NH, 1 H), 8.26 (br s, ArH, 1 H), 8.09 (m, NH, 1 H), 7.84 (d, *J* = 2.2, ArH, 1 H), 5.62 (t, *J* = 5.1, *NHBoc*, 1 H), 4.13 (t, *J* = 6.8, OCH<sub>2</sub>, 2 H), 4.00 (br s, CH<sub>2</sub>NHBoc, 2 H), 2.99 (d, *J* = 4.7, CONHCH<sub>3</sub>, 3 H), 1.83–1.66 (m, 3 H), 1.41 (s, C(CH<sub>3</sub>)<sub>3</sub>, 9 H), 0.95 (d, *J* = 6.5, CH(CH<sub>3</sub>)<sub>2</sub>, 6 H), 0.22 (s, (CH<sub>3</sub>)<sub>3</sub>Si, 9 H); <sup>13</sup>C NMR: 168.2, 165.4, 156.2, 154.8, 134.2, 128.9, 126.4, 122.8, 118.6, 100.3, 100.1, 80.0, 74.1, 44.8, 39.0, 28.4, 26.8, 25.1, 22.7, -0.1; *m/z* (ESI) 512 (M + Na<sup>+</sup>, 100%); HRMS (ESI) calcd for C<sub>25</sub>H<sub>39</sub>N<sub>3</sub>O<sub>5</sub>Si + Na<sup>+</sup>: 512.2551, found: 512.2553.

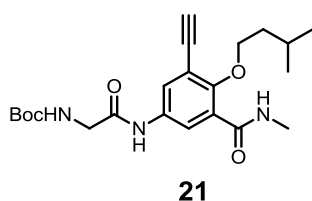

**Compound 21.** A solution of TBAF in THF (1 M, 0.6 mL) was added to a solution of **20** (0.28 g, 0.57 mmol) in THF (20 mL). The reaction mixture was stirred at 25 °C for 10 min. The solvent was evaporated *in vacuo* and the residue purified by flash chromatography (CHCl<sub>3</sub>/CH<sub>3</sub>OH/Et<sub>3</sub>N = 300/100/1) to afford compound **21** (0.24 g, 0.56 mmol, 99%) as a pale yellow solid. M.p.: 162–163 °C; *R*<sub>f</sub>: 0.33 (CHCl<sub>3</sub>/CH<sub>3</sub>OH/Et<sub>3</sub>N = 300/100/1); <sup>1</sup>H NMR: 8.86 (br s, NH, 1 H), 8.28 (d, *J* = 2.7, ArH, 1 H), 8.05 (m, NH, 1 H), 7.87 (d, *J* = 2.8, ArH, 1 H), 5.42 (br s, *NHBoc*, 1 H), 4.15 (t, *J* = 6.8, OCH<sub>2</sub>, 2 H), 3.99 (d, *J* = 5.3, CH<sub>2</sub>NHBoc, 2 H), 3.32 (s, C≡CH, 1 H), 3.02 (d, *J* = 4.9, CONHCH<sub>3</sub>, 3 H), 1.87–1.67 (m, 3 H), 1.46 (s, C(CH<sub>3</sub>)<sub>3</sub>, 9 H),

0.97 (d,  $J = 6.6$ ,  $\text{CH}(\text{CH}_3)_2$ , 6 H);  $^{13}\text{C}$  NMR: 168.3, 165.4, 156.3, 155.0, 134.3, 128.9, 126.7, 123.1, 117.5, 82.6, 80.0, 79.3, 74.2, 44.8, 39.0, 28.4, 26.8, 24.9, 22.6;  $m/z$  (ESI) 440 ( $\text{M} + \text{Na}^+$ , 100%); HRMS (ESI) calcd for  $\text{C}_{22}\text{H}_{31}\text{N}_3\text{O}_5 + \text{Na}^+$ : 440.2156, found: 440.2158.

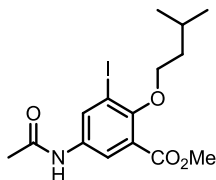

**23**

**Compound 23.** Compound **8** (1.29 g, 3.28 mmol) was added to a solution of  $\text{Na}_2\text{S}_2\text{O}_4$  (5.71 g, 32.8 mmol) in THF (50 mL) and  $\text{H}_2\text{O}$  (50 mL). The reaction mixture was stirred at 25 °C for 2 h. The solvent was evaporated *in vacuo* and the residue extracted with EtOAc (250 mL). The combined organic solvents were washed with brine, dried ( $\text{MgSO}_4$ ), and filtered. The solvent was evaporated and the crude amine **9** was used in the next step without further purification.

Acetic anhydride (0.44 g, 4.27 mmol) was added to the solution of the amine **9** in  $\text{CH}_2\text{Cl}_2$  (30 mL). The reaction mixture was stirred at 25 °C for 3 h. The solvent was evaporated *in vacuo* and the residue purified by flash column chromatography (EtOAc) to afford compound **23** as a white solid (1.05 g, 2.59 mmol, 79% in 2 steps). M.p.: 120–121 °C;  $R_f$ : 0.66 (EtOAc);  $^1\text{H}$  NMR: 8.80 (s, NH, 1 H), 8.14 (d,  $J = 2.2$ , ArH, 1 H), 7.85 (d,  $J = 2.3$ , ArH, 1 H), 3.86 (t,  $J = 6.6$ ,  $\text{OCH}_2$ , 2 H), 3.81 (s,  $\text{CO}_2\text{CH}_3$ , 3 H), 2.14 (s,  $\text{CH}_3\text{CONH}$ , 3 H), 1.86–1.75 (m,  $\text{CH}(\text{CH}_3)_2$ , 1 H), 1.68 (q,  $J = 6.6$ ,  $\text{OCH}_2\text{CH}_2$ , 2 H), 0.92 (d,  $J = 6.6$ ,  $\text{CH}(\text{CH}_3)_2$ , 6 H);  $^{13}\text{C}$  NMR: 169.5, 165.5, 154.6, 135.0, 134.8, 125.0, 123.3, 94.2, 74.0, 52.5, 38.9, 24.8, 24.3, 22.8;  $m/z$  (ESI) 428 ( $\text{M} + \text{Na}^+$ , 100%); HRMS (ESI) calcd for  $\text{C}_{15}\text{H}_{20}\text{INO}_4 + \text{Na}^+$ : 428.0329, found: 428.0330.

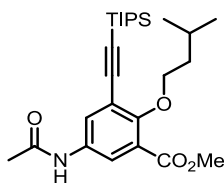

**24**

**Compound 24.** A mixture of compound **23** (0.65 g, 1.60 mmol), triisopropylsilylacetylene (1.10 mL, 4.81 mmol),  $\text{CuI}$  (31 mg, 0.16 mmol),  $\text{Pd}(\text{PPh}_3)_2\text{Cl}_2$  (0.11 g, 0.16 mmol) and  $\text{Et}_3\text{N}$  (5 mL) in dry THF (30 mL) was frozen in a sealed tube with liquid  $\text{N}_2$  and degassed with  $\text{N}_2$  (3  $\times$ ). The mixture was stirred at 50 °C for 12 h. The reaction mixture was filtered through a short pad of Celite and then washed with  $\text{Et}_2\text{O}$  (20 mL). The filtrate was concentrated *in vacuo* and the residue purified by flash chromatography (hexane/ $\text{CHCl}_3 = 1/3$ ) to afford compound **24**

(0.52 g, 1.14 mmol, 71%) as a yellow oil.  $R_f$ : 0.25 (hexane/ $\text{CHCl}_3 = 1/3$ );  $^1\text{H NMR}$ : 7.80–7.77 (m, ArH, 2 H), 7.12 (br s, NH, 1 H), 4.14 (t,  $J = 7.0$ ,  $\text{OCH}_2$ , 2 H), 3.89 (s,  $\text{CO}_2\text{CH}_3$ , 3 H), 2.16 (s,  $\text{CH}_3\text{CONH}$ , 3 H), 1.80–1.69 (m, 3 H), 1.13 (s,  $(\text{CH}_3)_2\text{CHSi} + (\text{CH}_3)_2\text{CHSi}$ , 21 H), 0.93 (d,  $J = 6.2$ ,  $\text{CH}(\text{CH}_3)_2$ , 6 H);  $^{13}\text{C NMR}$ : 169.3, 166.2, 156.4, 133.5, 129.6, 125.6, 123.0, 119.8, 102.2, 96.4, 74.0, 52.3, 38.8, 25.0, 24.1, 22.7, 18.7, 11.3;  $m/z$  (ESI) 482 ( $\text{M} + \text{Na}^+$ , 100%); HRMS (ESI) calcd for  $\text{C}_{26}\text{H}_{41}\text{NO}_4\text{Si} + \text{Na}^+$ : 482.2697, found: 482.2697.

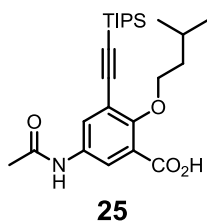

**Compound 25.** A mixture of compound **24** (0.50 g, 1.09 mmol) in THF (30 mL) and aqueous KOH solution (2.5 M, 10 mL) was stirred at 25 °C for 12 h. The reaction mixture was concentrated *in vacuo* and acidified with saturated  $\text{NH}_4\text{Cl}$  solution (50 mL). The mixture was then extracted with EtOAc ( $3 \times 50$  mL) and the combined extracts washed with brine, dried ( $\text{MgSO}_4$ ), filtered and evaporated *in vacuo* to give compound **25** (0.47 g, 1.06 mmol, 97%) as a pale yellow solid. M.p.: 188–189 °C;  $R_f$ : 0.1 (hexane/ $\text{CHCl}_3 = 1/3$ );  $^1\text{H NMR}$ : 11.51 (br s,  $\text{CO}_2\text{H}$ , 1 H), 9.04 (s, NH, 1 H), 8.50 (d,  $J = 1.6$ , ArH, 1 H), 7.99 (s, ArH, 1 H), 4.46 (t,  $J = 6.8$ ,  $\text{OCH}_2$ , 2 H), 2.24 (s,  $\text{CH}_3\text{CONH}$ , 3 H), 1.75–1.72 (m, 3 H), 1.11 (s,  $(\text{CH}_3)_2\text{CHSi} + (\text{CH}_3)_2\text{CHSi}$ , 21 H), 0.93 (d,  $J = 6.0$ ,  $\text{CH}(\text{CH}_3)_2$ , 6 H);  $^{13}\text{C NMR}$ : 169.8, 165.9, 154.9, 135.5, 131.4, 123.5, 121.8, 118.2, 101.4, 98.8, 75.5, 38.5, 25.2, 24.3, 22.6, 18.7, 11.3;  $m/z$  (ESI) 468 ( $\text{M} + \text{Na}^+$ , 100%); HRMS (ESI) calcd for  $\text{C}_{25}\text{H}_{39}\text{NO}_4\text{Si} + \text{Na}^+$ : 468.2541, found: 468.2546.

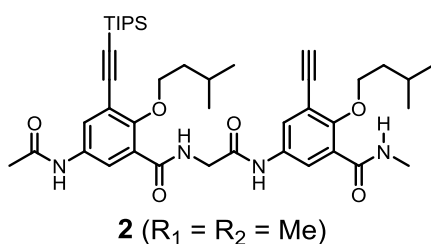

**Compound 2** ( $\text{R}_1 = \text{R}_2 = \text{Me}$ ). A mixture of trifluoroacetic acid (3 mL) and compound **21** (0.26 g, 0.63 mmol) in  $\text{CH}_2\text{Cl}_2$  (30 mL) was stirred at 25 °C for 1 h. The reaction mixture was then neutralized with saturated  $\text{Na}_2\text{CO}_3$  solution, extracted with  $\text{CH}_2\text{Cl}_2$  ( $3 \times 50$  mL) and the combined extracts were washed with brine, dried ( $\text{MgSO}_4$ ), filtered and evaporated *in vacuo* to give crude amine **22** which was used in the next step without further purification.

EDCI (0.20 g, 0.69 mmol) and HOBt (92.6 g, 0.69 mmol) were added to a solution of acid **25** (0.28 g, 0.63 mmol) in CH<sub>2</sub>Cl<sub>2</sub> (30 mL). After 30 min, a solution of the amine **22** in CH<sub>2</sub>Cl<sub>2</sub> (10 mL) was then added and the reaction mixture stirred at 25 °C for 12 h. The solvent was evaporated *in vacuo* and the residue purified by flash chromatography (CHCl<sub>3</sub>/CH<sub>3</sub>OH = 20/1) to give a solid which was further purified by recrystallization from methanol to afford compound **26** (0.34 g, 0.46 mmol, 73% in 2 steps) as a white solid. M.p.: 247–248 °C (dec.); *R*<sub>f</sub>: 0.23 (CHCl<sub>3</sub>/CH<sub>3</sub>OH = 20/1); <sup>1</sup>H NMR: 10.24 (s, NH, 1 H), 9.78 (s, NH, 1 H), 9.56 (s, NH, 1 H), 8.74 (d, *J* = 2.3, ArH, 1 H), 8.57 (d, *J* = 2.2, ArH, 1 H), 8.22 (m, NH, 1 H), 8.06 (d, *J* = 2.4, ArH, 1 H), 7.99 (s, ArH, 1 H), 4.62 (d, *J* = 3.0, CH<sub>2</sub>CONH, 2 H), 4.34 (t, *J* = 7.5, OCH<sub>2</sub>, 2 H), 4.19 (t, *J* = 6.6, OCH<sub>2</sub>, 2 H), 3.34 (s, C≡CH, 1 H), 3.04 (d, *J* = 4.7, CONHCH<sub>3</sub>, 3 H), 2.27 (s, CH<sub>3</sub>CONH, 3 H), 1.93–1.61 (m, 6 H), 1.16 (s, (CH<sub>3</sub>)<sub>2</sub>CHSi + (CH<sub>3</sub>)<sub>2</sub>CHSi, 21 H), 0.99 (d, *J* = 6.5, CH(CH<sub>3</sub>)<sub>2</sub>, 6 H), 0.91 (d, *J* = 6.6, CH(CH<sub>3</sub>)<sub>2</sub>, 6 H); <sup>13</sup>C NMR: 169.4, 166.2, 165.8, 165.0, 155.3, 154.8, 135.1, 135.0, 131.0, 128.7, 126.6, 125.0, 122.6, 122.5, 119.1, 117.9, 102.8, 97.0, 82.7, 79.4, 75.0, 74.5, 45.4, 39.1, 38.2, 27.1, 25.4, 25.1, 24.5, 22.8, 22.7, 18.9, 11.5; *m/z* (ESI) 767 (M + Na<sup>+</sup>, 100%); HRMS (ESI) calcd for C<sub>42</sub>H<sub>60</sub>N<sub>4</sub>O<sub>6</sub>Si + Na<sup>+</sup>: 767.4174, found: 767.4178.

## 1.5 Attempted synthesis of diacetylene-linked macrocycle **5**

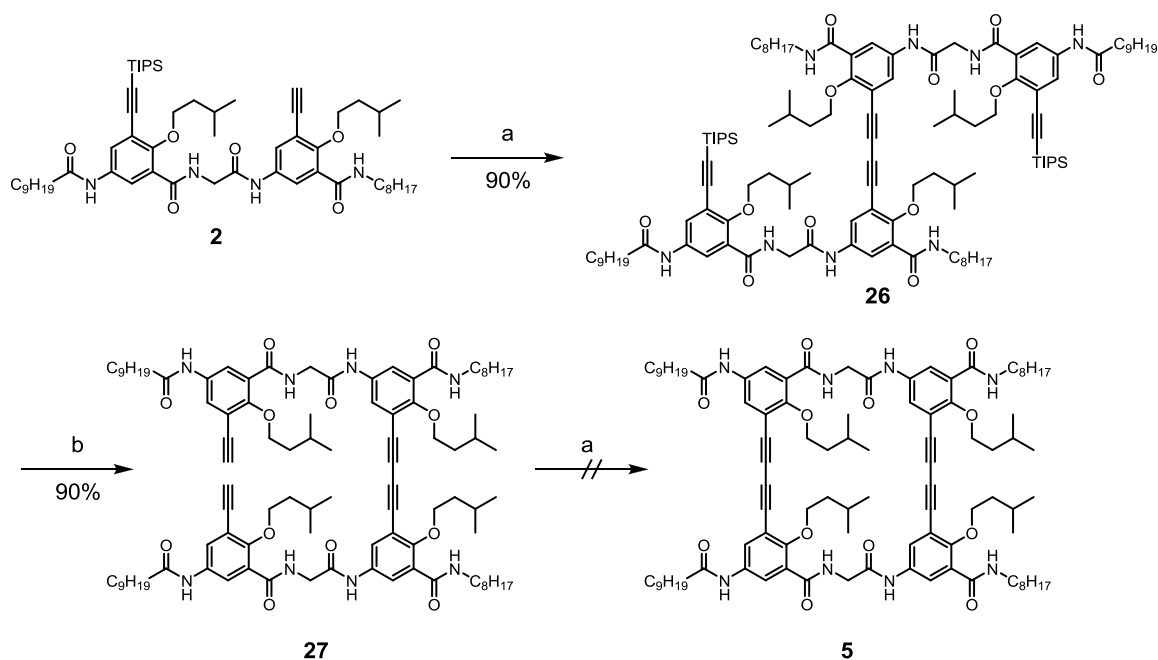

**Scheme S3.** Reagent and conditions: (a) TMEDA, CuCl, CH<sub>2</sub>Cl<sub>2</sub>, O<sub>2</sub> (1 atm), 24 h; (b) TBAF, THF, 10 min.

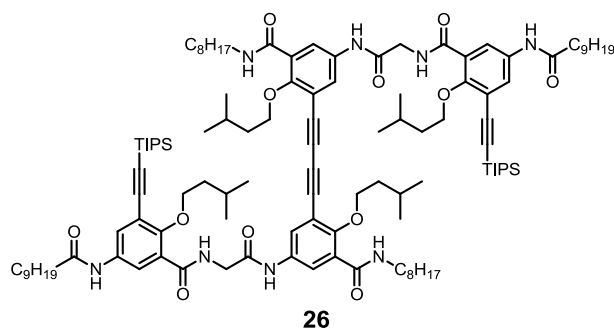

**Compound 26.** A mixture of compound **2** (0.21 g, 0.22 mmol), CuCl (0.11 g, 1.10 mmol) and tetramethylethylenediamine (TMEDA) (0.16 mL, 1.10 mmol) were stirred in CH<sub>2</sub>Cl<sub>2</sub> (10 mL) under O<sub>2</sub> (1 atm) at 25 °C for 24 h. The solvent was evaporated *in vacuo* and the residue subjected to flash column chromatography (CHCl<sub>3</sub>/CH<sub>3</sub>OH = 20/1) to afford compound **26** (0.19 g, 98.9 μmol, 90%) as a white solid. M.p.: 270 °C (dec.); *R*<sub>f</sub>: 0.33 (CHCl<sub>3</sub>/CH<sub>3</sub>OH = 20/1); <sup>1</sup>H NMR (10% CD<sub>3</sub>OH in CDCl<sub>3</sub>):<sup>[S6]</sup> 10.12 (br s, NH, 2 H), 9.52 (br s, NH, 2 H), 9.20 (br s, NH, 2 H), 8.53 (br s, ArH, 2 H), 8.43 (br s, ArH, 2 H), 8.15 (br s, NH, 2 H), 7.90 (br s, ArH, 2 H), 7.82 (br s, ArH, 2 H), 4.43–4.24 (m, CH<sub>2</sub>CONH + OCH<sub>2</sub>, 12 H), 2.41 (br s, CH<sub>2</sub>CONH, 4 H), 1.83–0.90 (m, 142 H); <sup>13</sup>C NMR (10% CD<sub>3</sub>OH/CDCI<sub>3</sub>, 35 °C): 173.1, 166.9, 165.7, 164.9, 155.8, 155.2, 134.9, 134.9, 130.4, 128.8, 127.3, 125.6, 123.5, 122.6, 119.0, 117.3,

[S6] <sup>1</sup>H-NMR signal of CONHCH<sub>2</sub> (4 H) was found to merge with that of residual H<sub>2</sub>O.

102.7, 97.1, 78.7, 78.6, 75.0, 74.9, 44.7, 40.4, 39.2, 38.5, 37.4, 32.0, 31.9, 29.6, 29.49, 29.46, 29.4, 29.3, 27.3, 25.8, 25.4, 25.2, 22.8, 22.7, 18.8, 14.1, 11.5;  $m/z$  (ESI) 1931 ( $M + Na^+$ , 100%); HRMS (ESI) calcd for  $C_{114}H_{178}N_8O_{12}Si_2 + Na^+$ : 1931.3025, found: 1931.3028.

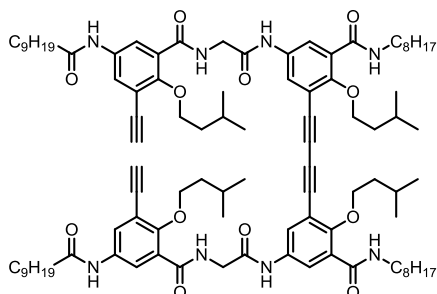

**27**

**Compound 27.** A solution of TBAF in THF (1 M, 0.15 mL) was added to a solution of **26** (0.26 g, 0.14 mmol) in THF (20 mL). The reaction mixture was stirred at 25 °C for 10 min. The solvent was evaporated *in vacuo* and the residue purified by flash chromatography ( $CHCl_3/CH_3OH = 20/1$ ) to afford compound **27** (0.20 g, 0.12 mmol, 90%) as a white solid. M.p.: >350 °C (dec.);  $R_f$ : 0.43 ( $CHCl_3/CH_3OH = 20/1$ );  $^1H$  NMR (10%  $CD_3OH$  in  $CDCl_3$ , 35 °C): 9.99 (s, NH, 2 H), 9.37 (s, NH, 2 H), 9.12 (s, NH, 2 H), 8.50 (d,  $J = 2.2$ , ArH, 2 H), 8.40 (s, ArH, 2 H), 8.08 (t,  $J = 5.0$ , NH, 2 H), 7.92 (d,  $J = 2.7$ , ArH, 2 H), 7.86 (d,  $J = 2.6$ , ArH, 2 H), 4.43 (d,  $J = 4.1$ ,  $CH_2CONH$ , 4 H), 4.30–4.23 (m,  $OCH_2$ , 8 H), 3.47 (q,  $J = 6.7$ ,  $CONHCH_2$ , 4 H), 3.38 (s,  $C\equiv CH$ , 2 H), 2.40 (t,  $J = 7.4$ ,  $CH_2CONH$ , 4 H), 1.92–1.60 (m, 20 H), 1.40–1.27 (m, 44 H), 1.02 (d,  $J = 6.5$ ,  $CH(CH_3)_2$ , 12 H), 0.97 (d,  $J = 6.2$ ,  $CH(CH_3)_2$ , 12 H), 0.90–0.86 (m,  $CH_3$ , 12 H);  $^{13}C$  NMR (10%  $CD_3OH$  in  $CDCl_3$ , 35 °C): 173.1, 167.0, 165.6, 165.0, 155.8, 155.7, 135.0, 134.9, 130.1, 128.9, 127.3, 125.8, 123.5, 123.0, 117.8, 117.3, 82.9, 79.6, 78.7, 75.0, 74.8, 44.7, 40.4, 39.3, 38.8, 37.4, 32.0, 31.9, 29.62, 29.59, 29.50, 29.47, 29.4, 29.3, 27.3, 25.8, 25.25, 25.17, 22.8, 14.09, 14.07;  $m/z$  (ESI) 1619 ( $M + Na^+$ , 100%); HRMS (ESI) calcd for  $C_{96}H_{138}N_8O_{12} + Na^+$ : 1619.0359, found: 1619.0364.

**Attempted Synthesis of Compound 5.** A mixture of CuCl (31 mg, 0.31 mmol) and tetramethylethylenediamine (TMEDA) (47  $\mu$ L, 0.31 mmol) were stirred in  $CH_2Cl_2$  (50 mL) under  $O_2$  (1 atm). A solution of compound **27** (0.10 g, 62.6  $\mu$ mol) in  $CH_2Cl_2$  (20 mL) was added dropwise over a period of 1 h and the mixture was stirred at 25 °C for 2 d. The solvent was evaporated *in vacuo* and the residue subjected to flash column chromatography ( $CHCl_3/CH_3OH = 20/1$ ) to afford a solid. The size exclusion chromatographic analysis revealed that the solid was a complex mixture of oligomers.

2.  $^1\text{H}$ -,  $^{31}\text{P}$ -NMR characterization and 2D NMR experiments of compounds **1**, **2**, **3** and **4**
- 2.1.  $^1\text{H}$ -NMR spectra of supramolecular ladder polymer **1** in the presence of different amount of  $\text{CD}_3\text{OH}$  in  $\text{CDCl}_3$

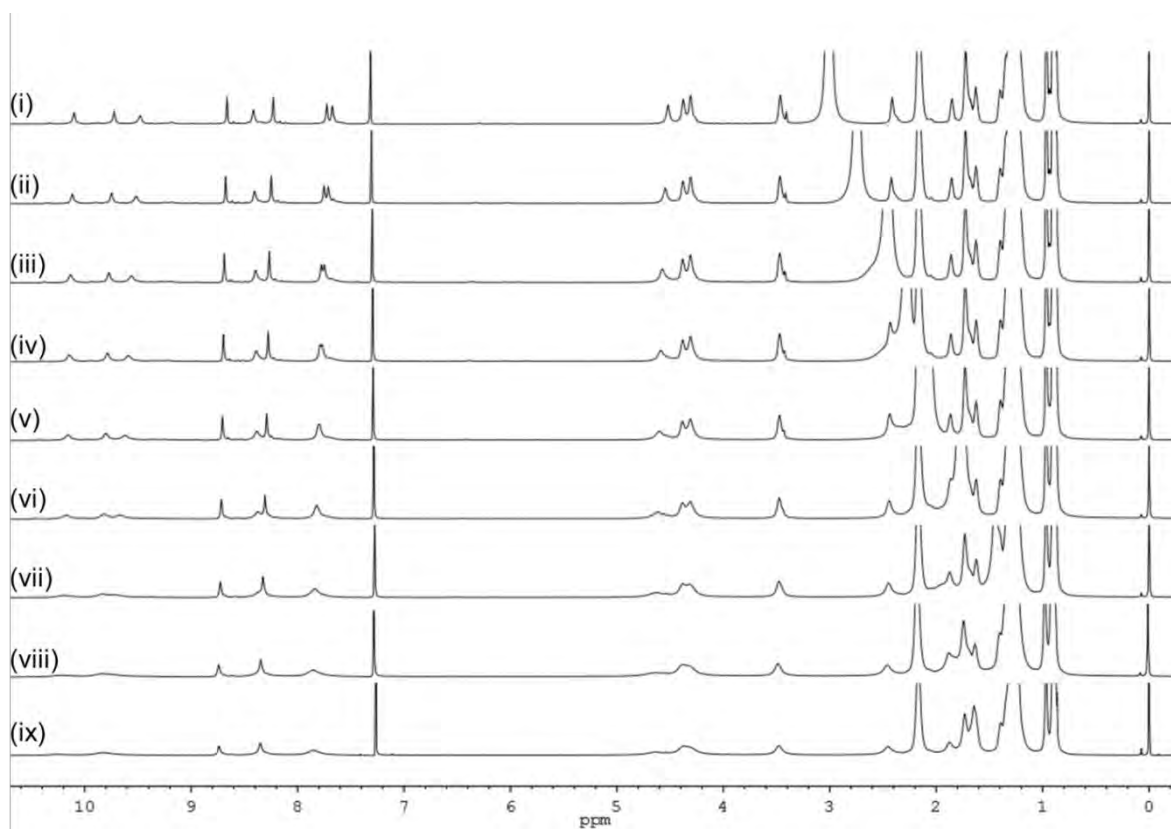

**Figure S1.** Stacked  $^1\text{H}$ -NMR spectra (10 mM, 700 MHz) of supramolecular ladder polymer **1** in different percentage of  $\text{CD}_3\text{OH}/\text{CDCl}_3$  (i) 5%, (ii) 4%, (iii) 3%, (iv) 2.5%, (v) 2%, (vi) 1.5%, (vii) 1%, (viii) 0.5% and (ix) pure  $\text{CDCl}_3$ .

2.2.  $^{31}\text{P}$ -NMR spectra of supramolecular polymer **3**, **4** and supramolecular ladder polymer **1**  
 $\text{PPh}_3$  was used as external standard.

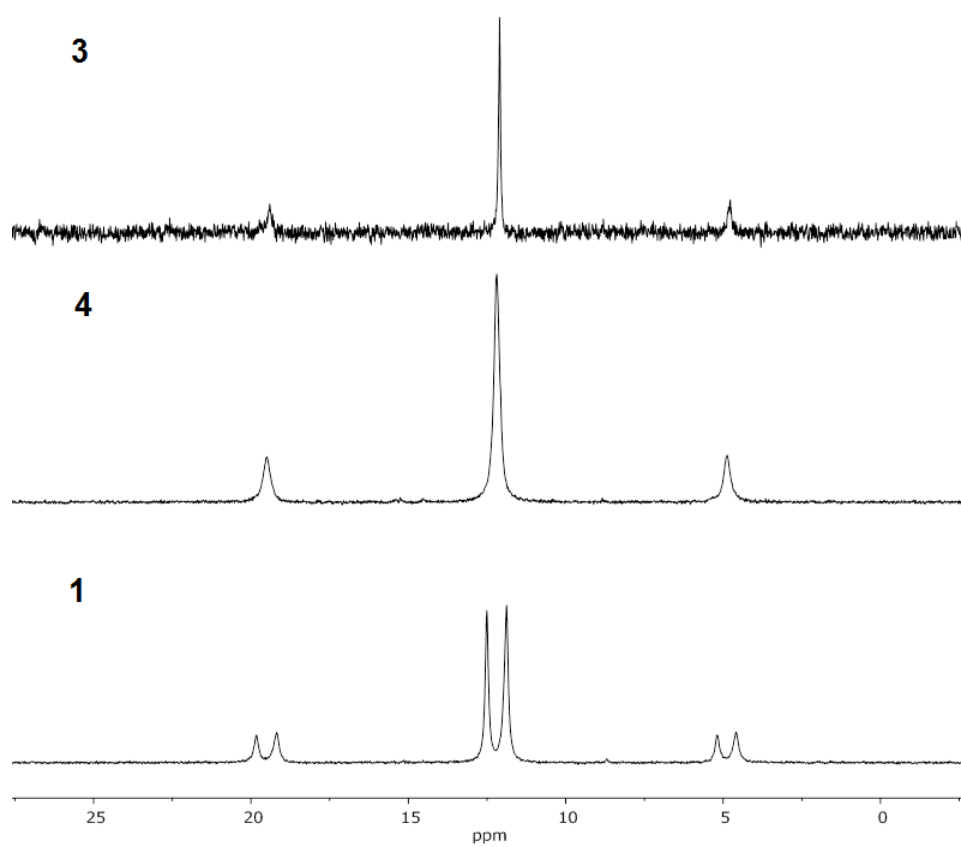

**Figure S2.**  $^{31}\text{P}$ -NMR spectrum of (162 MHz) of (top) supramolecular polymer **3** ( $\text{CDCl}_3$ ), (middle) supramolecular polymer **4** ( $\text{CDCl}_3$ ) and (bottom) supramolecular ladder polymer **1** (4%  $\text{CD}_3\text{OH}/\text{CDCl}_3$ ).



### 2.3. 2D ROESY spectra of dimer **2**, supramolecular ladder polymer **1** and supramolecular polymer **3**

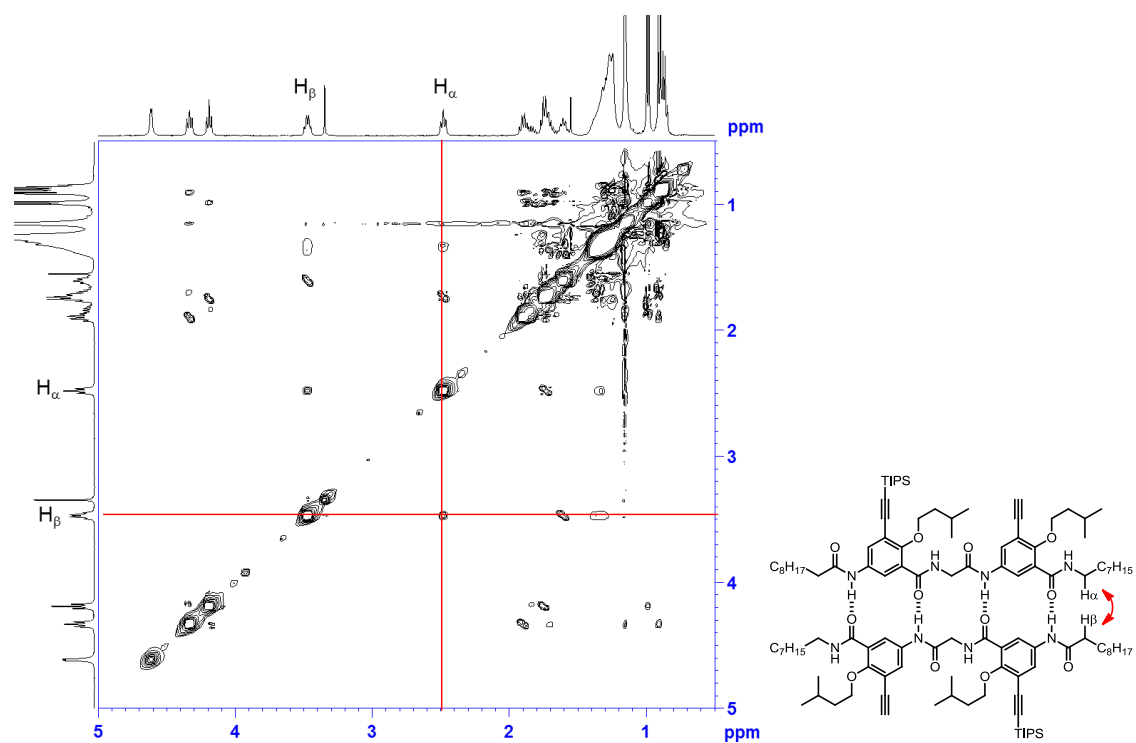

**Figure S3.** Partial ROESY spectrum (400 MHz, 10 mM, CDCl<sub>3</sub>) of dimer **2** (red arrow indicating observed intermolecular NOE contact).

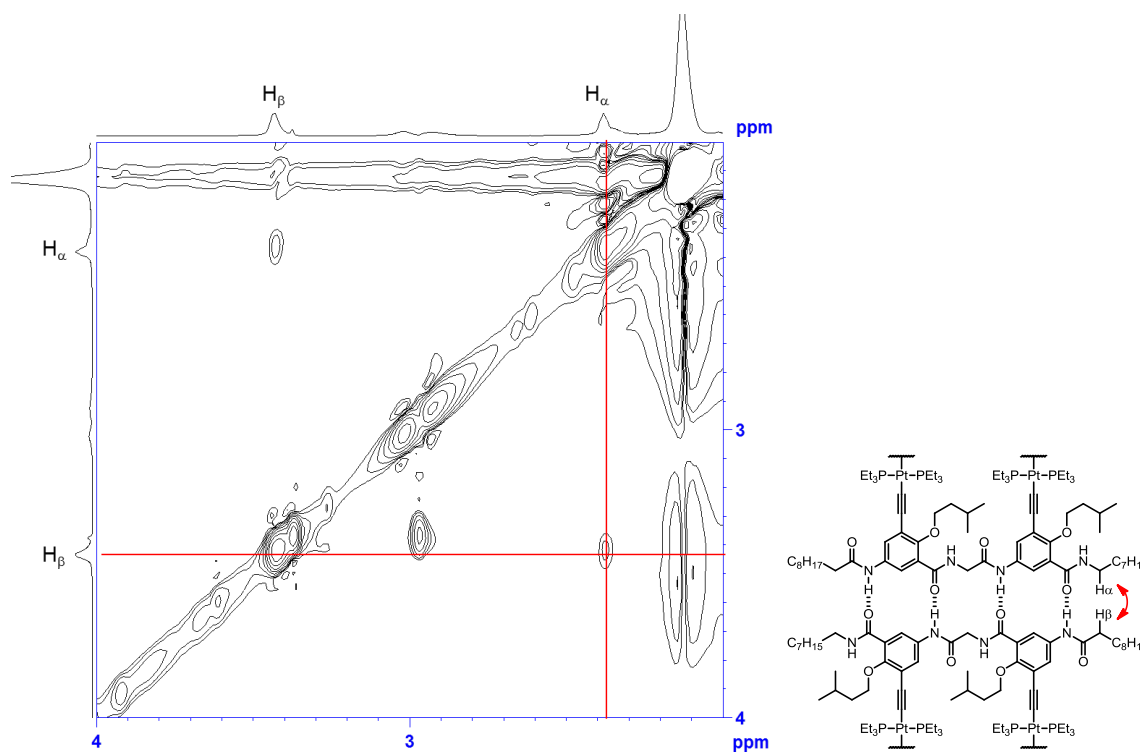

**Figure S4.** Partial ROESY spectrum with water suppression (700 MHz, 7 mM, 2% CD<sub>3</sub>OH/CDCl<sub>3</sub>) of supramolecular ladder polymer **1** (red arrow indicating observed intermolecular NOE contact).

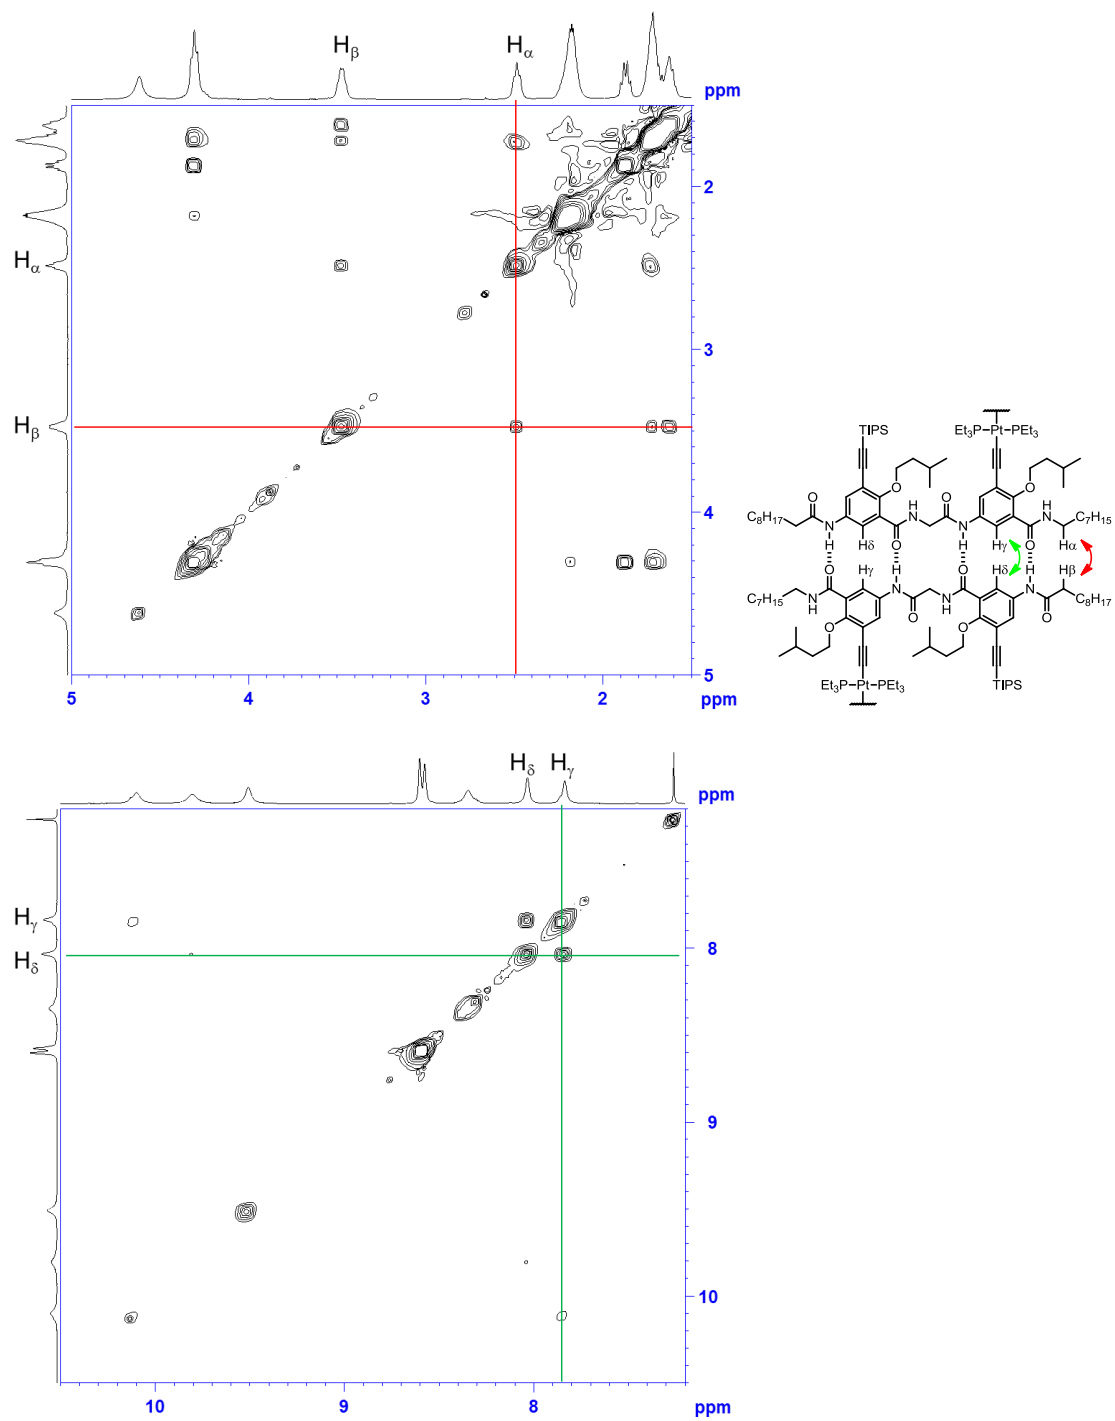

**Figure S5.** Partial ROESY spectrum (400 MHz, 50 mM,  $\text{CDCl}_3$ ) of supramolecular polymer **3** (red and green arrows indicating observed intermolecular NOE contacts).

### 3. Determination of dimerization $K_{\text{dim}}$ and association constants $K_{\text{ass}}$

#### 3.1. Association models

The dimerization model reported by Moore<sup>7</sup> was used to determine the  $K_{\text{dim}}$  value of compound **2**. The value was obtained by curve fitting using a commercial program.

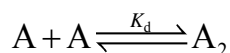

$$K_{\text{dim}} = \frac{[A_2]}{[A]^2}$$

$$\delta_{\text{obs}} = \delta_d - \frac{-1 + \sqrt{1 + 8K_{\text{dim}}c_t}}{4K_{\text{dim}}c_t} (\delta_d - \delta_m)$$

where  $\delta_{\text{obs}}$  is the observed chemical shift of a NMR signal,

$\delta_m$  is the chemical shift of monomer A,

$\delta_d$  is the chemical shift of dimer  $A_2$

The isodesmic model reported by Moore<sup>[S7]</sup> was used to determine the  $K_{\text{ass}}$  values of compounds **1** and **3**. The values were obtained by curve fitting using a commercial program.

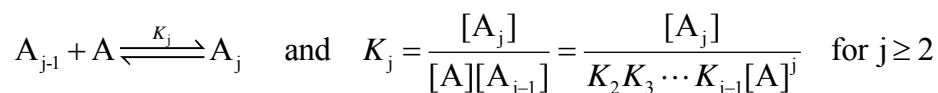

$$K = K_j \quad \text{for } j \geq 2$$

$$\begin{aligned} \delta_{\text{obs}} &= \frac{[A]}{c_t} \delta_m + \frac{c_t - [A]}{c_t} \delta_{\text{agg}} = \delta_{\text{agg}} - \frac{[A]}{c_t} (\delta_{\text{agg}} - \delta_m) \\ &= \delta_{\text{agg}} - \frac{2Kc_t + 1 - \sqrt{1 + 4Kc_t}}{2K^2c_t^2} (\delta_{\text{agg}} - \delta_m) \end{aligned}$$

where  $\delta_{\text{obs}}$  is the observed chemical shift of a NMR signal,

$\delta_m$  is the chemical shift of monomer A,

$\delta_{\text{agg}}$  is the chemical shift of the aggregated species

---

[S7] D. Zhao, J. S. Moore, *Org. Biomol. Chem.* **2003**, *1*, 3471.

### 3.2. $K_{\text{dim}}$ of dimer **2** in $\text{CDCl}_3$

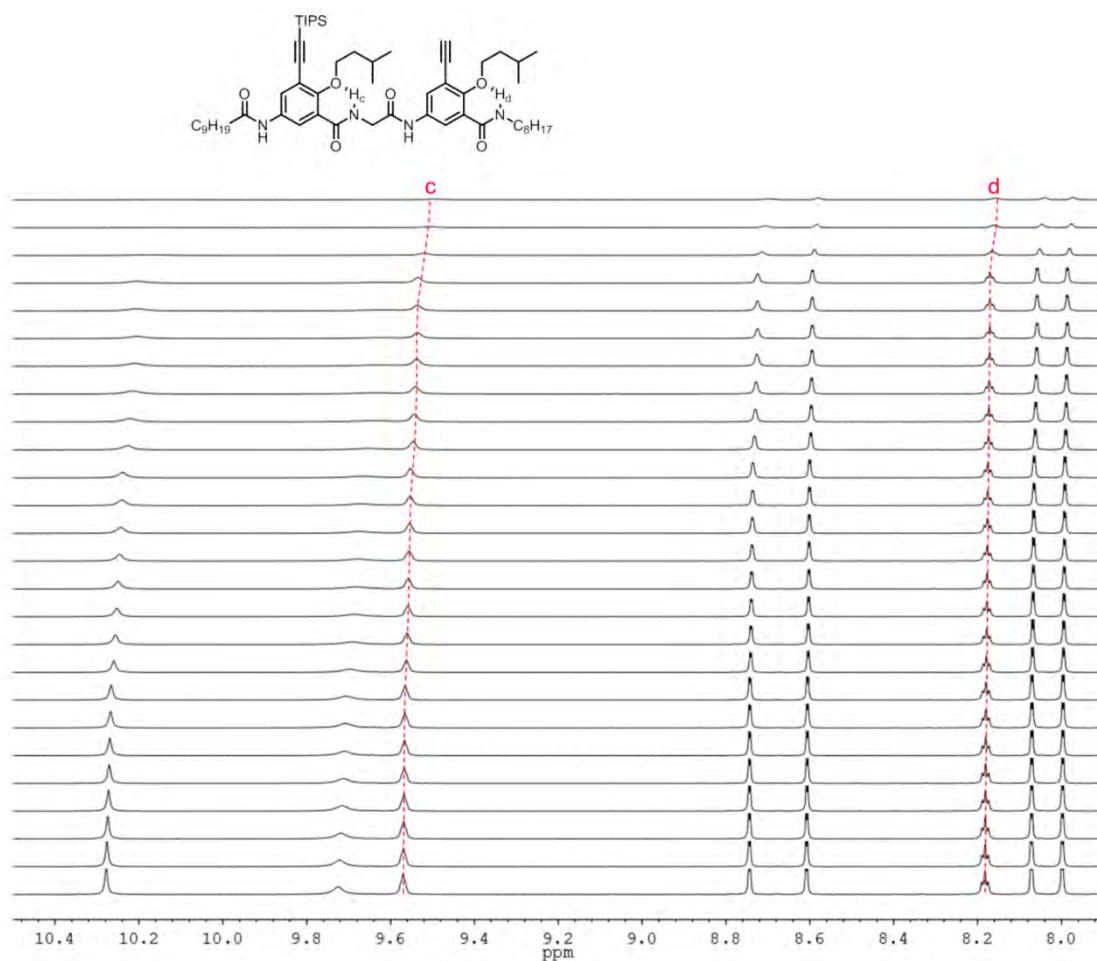

**Figure S6.** Stacked partial  $^1\text{H}$  NMR spectra (700 MHz,  $\text{CDCl}_3$ ) of DADA quadruple H-bonding array **2** from 0.3 to 50 mM (from top to bottom).

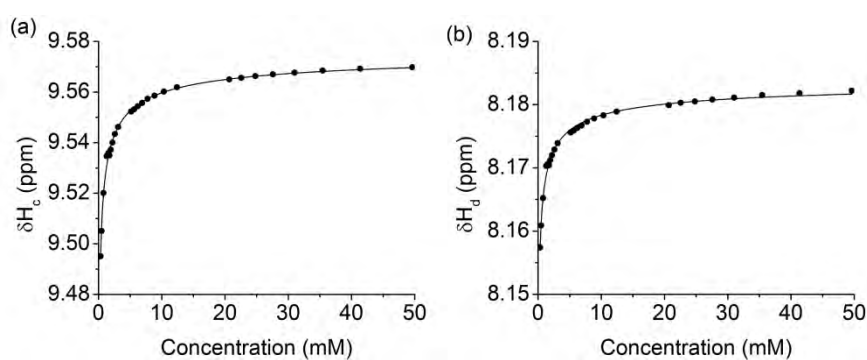

**Figure S7.** Concentration dependent  $^1\text{H}$ -NMR data of DADA quadruple H-bonding array **2**: (a)  $\text{H}_c$ ; (b)  $\text{H}_d$ .

**Table S1.**  $K_{\text{dim}}$  value of DADA quadruple H-bonding array **2**.

| Signal       | $K_{\text{dim}} (\text{M}^{-1})$ | $\delta_{\text{m}} (\text{ppm})$ | $\delta_{\text{d}} (\text{ppm})$ | Adjusted $r^2$ |
|--------------|----------------------------------|----------------------------------|----------------------------------|----------------|
| $\text{H}_c$ | $6000 \pm 2000$                  | $9.37 \pm 0.02$                  | $9.5782 \pm 0.0006$              | 0.9969         |
| $\text{H}_d$ | $4000 \pm 1000$                  | $8.125 \pm 0.006$                | $8.1846 \pm 0.0003$              | 0.9955         |
|              | $5000 \pm 2000$ (average)        |                                  |                                  |                |

### 3.3. $K_{\text{dim}}$ of dimer **2** in 2% $\text{CD}_3\text{OH}/\text{CDCl}_3$

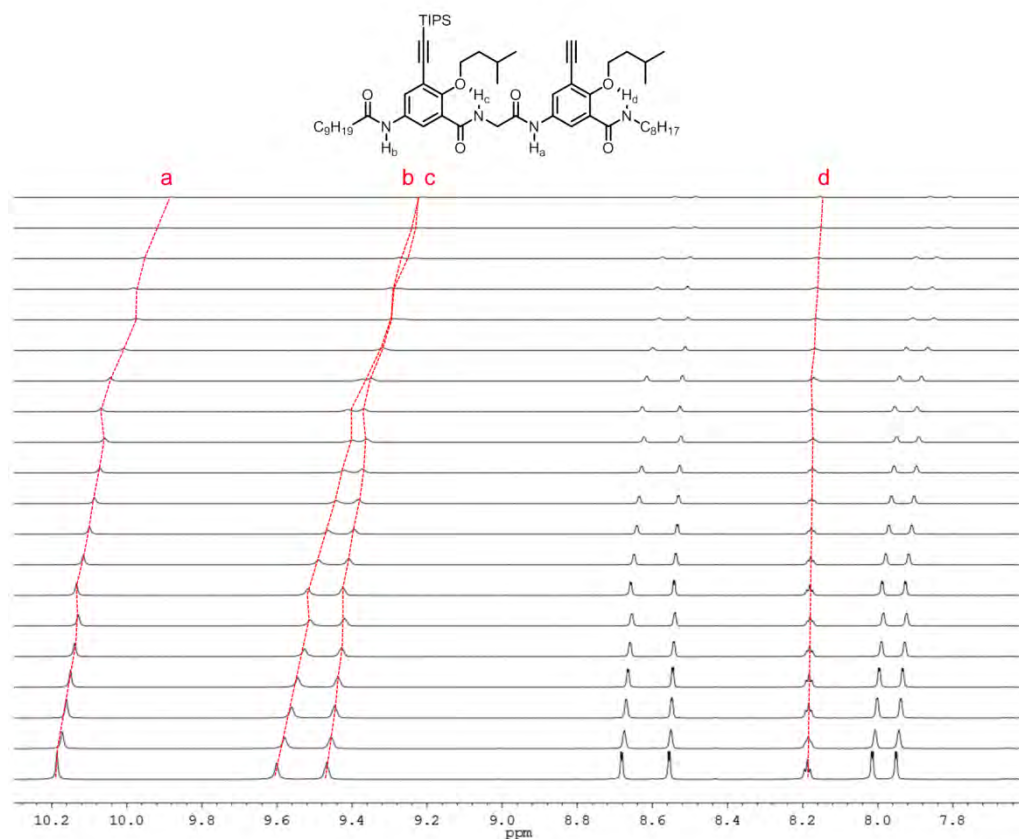

**Figure S8.** Stacked partial  $^1\text{H}$  NMR spectra (700 MHz, 2%  $\text{CD}_3\text{OH}/\text{CDCl}_3$ ) of DADA quadruple H-bonding array **2** from 0.3 to 20 mM (from top to bottom).

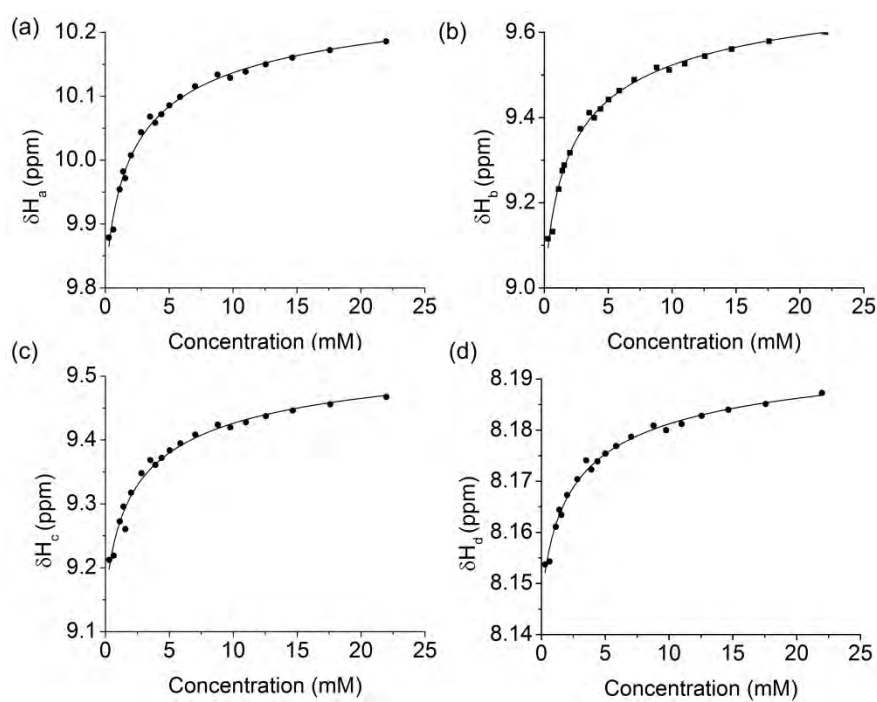

**Figure S9.** Concentration dependent  $^1\text{H}$ -NMR data of DADA quadruple H-bonding array **2**: (a)  $\text{H}_a$ ; (b)  $\text{H}_b$ ; (c)  $\text{H}_c$ ; (d)  $\text{H}_d$ .

**Table S2.**  $K_{\text{dim}}$  value of DADA quadruple H-bonding array 2.

| Signal         | $K_{\text{dim}} (\text{M}^{-1})$ | $\delta_{\text{m}} (\text{ppm})$ | $\delta_{\text{d}} (\text{ppm})$ | Adjusted $r^2$ |
|----------------|----------------------------------|----------------------------------|----------------------------------|----------------|
| H <sub>a</sub> | $300 \pm 50$                     | $9.80 \pm 0.02$                  | $10.31 \pm 0.01$                 | 0.9907         |
| H <sub>b</sub> | $300 \pm 50$                     | $9.00 \pm 0.02$                  | $9.80 \pm 0.02$                  | 0.9919         |
| H <sub>c</sub> | $200 \pm 60$                     | $9.15 \pm 0.02$                  | $9.59 \pm 0.02$                  | 0.9786         |
| H <sub>d</sub> | $200 \pm 50$                     | $8.146 \pm 0.001$                | $8.202 \pm 0.002$                | 0.9882         |
|                | $300 \pm 100$ (average)          |                                  |                                  |                |

### 3.4. $K_{\text{ass}}$ of supramolecular polymer **3** in 2% $\text{CD}_3\text{OH}/\text{CDCl}_3$

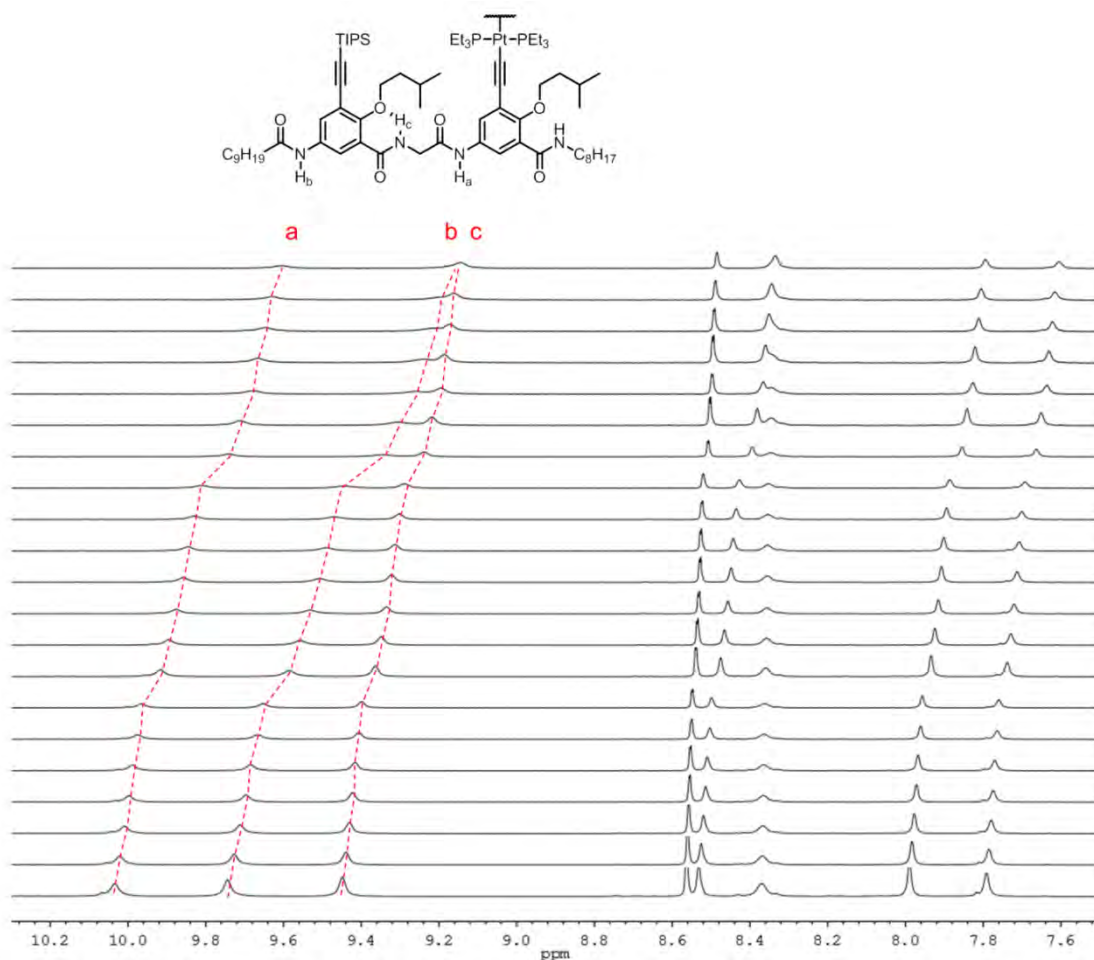

**Figure S10.** Stacked partial  $^1\text{H}$  NMR spectra (700 MHz, 2%  $\text{CD}_3\text{OH}/\text{CDCl}_3$ ) of supramolecular polymer **3** from 0.3 to 20 mM (from top to bottom).

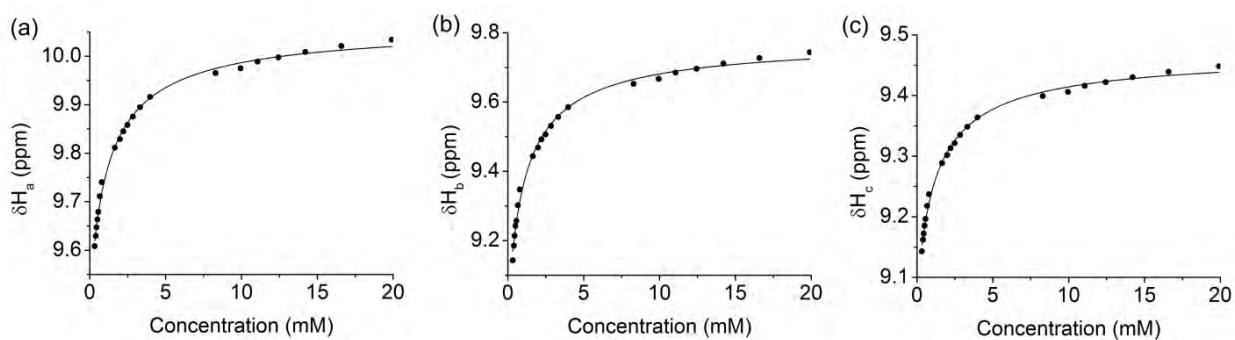

**Figure S11.** Concentration dependent  $^1\text{H}$ -NMR data of supramolecular polymer **3**: (a)  $\text{H}_a$ ; (b)  $\text{H}_b$ ; (c)  $\text{H}_c$ .

**Table S3.**  $K_{\text{ass}}$  value of supramolecular polymer **3** based on the isodesmic model

| Signal       | $K_{\text{ass}} (\text{M}^{-1})$ | $\delta_{\text{m}} (\text{ppm})$ | $\delta_{\text{d}} (\text{ppm})$ | Adjusted $r^2$ |
|--------------|----------------------------------|----------------------------------|----------------------------------|----------------|
| $\text{H}_a$ | $470 \pm 50$                     | $9.49 \pm 0.02$                  | $10.064 \pm 0.007$               | 0.9959         |
| $\text{H}_b$ | $530 \pm 60$                     | $8.97 \pm 0.03$                  | $9.78 \pm 0.01$                  | 0.9948         |
| $\text{H}_c$ | $460 \pm 40$                     | $9.06 \pm 0.01$                  | $9.470 \pm 0.005$                | 0.9959         |
|              | $490 \pm 90$ (average)           |                                  |                                  |                |

### 3.5. $K_{\text{ass}}$ of supramolecular ladder polymer **1** in 2% $\text{CD}_3\text{OH}/\text{CDCl}_3$

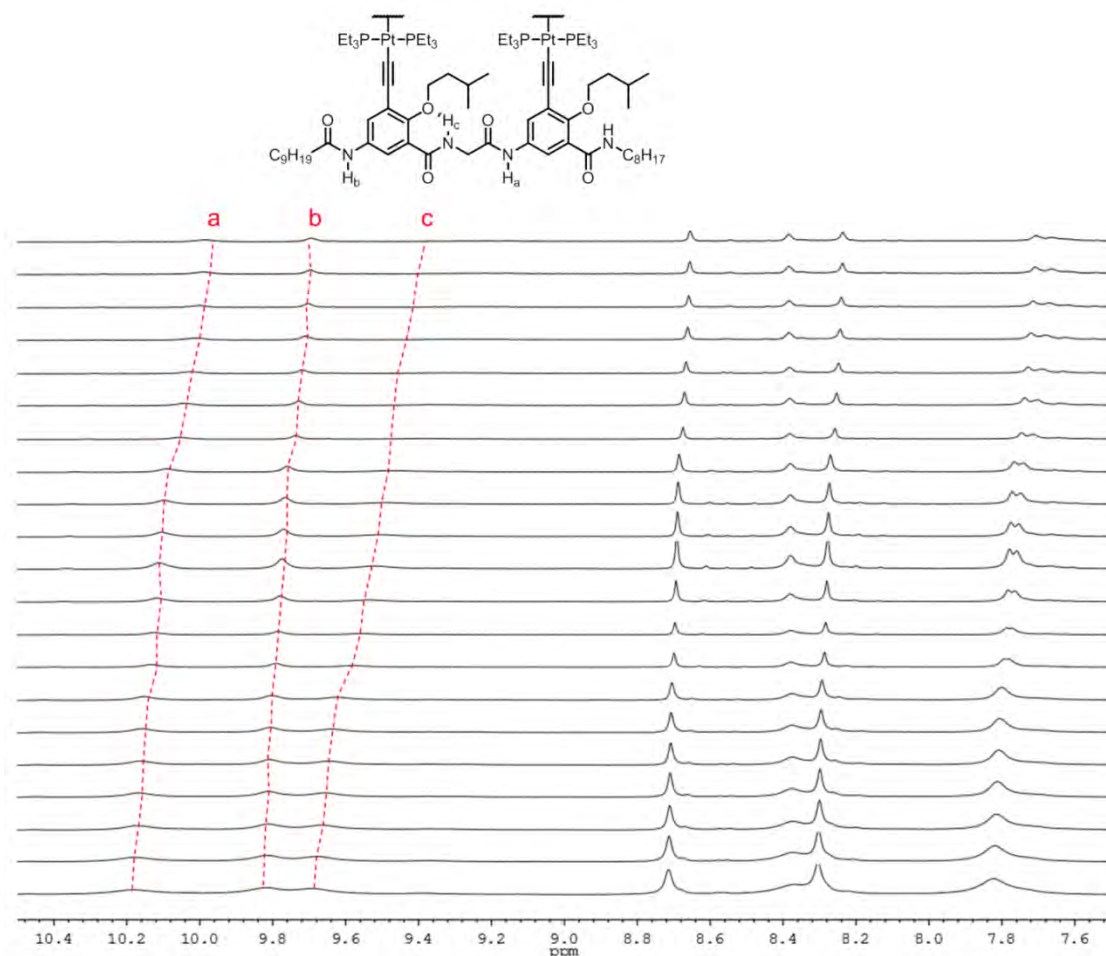

**Figure S12.** Stacked partial  $^1\text{H}$  NMR spectra (700 MHz, 2%  $\text{CD}_3\text{OH}/\text{CDCl}_3$ ) of supramolecular ladder polymer **1** from 0.3 to 18 mM (from top to bottom).

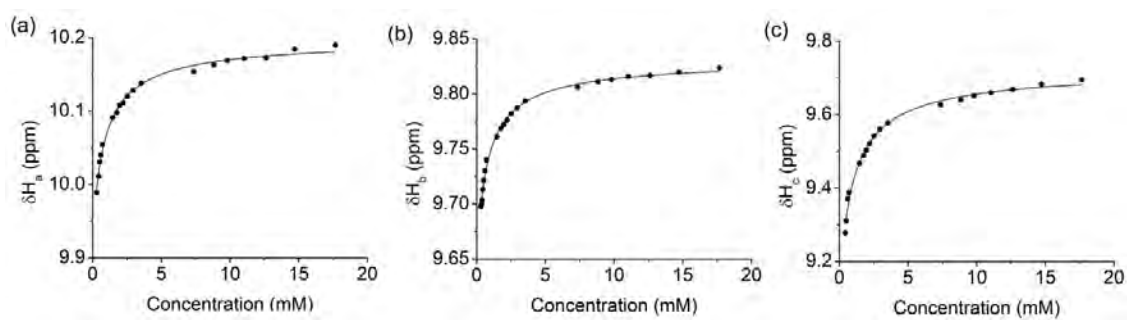

**Figure S13.** Concentration dependent  $^1\text{H}$ -NMR data of supramolecular ladder polymer **1**: (a)  $\text{H}_a$ ; (b)  $\text{H}_b$ ; (c)  $\text{H}_c$ .

**Table S4.**  $K_{\text{ass}}$  value of supramolecular polymer **1** based on the isodesmic model

| Signal       | $K_{\text{ass}}$ ( $\text{M}^{-1}$ ) | $\delta_{\text{m}}$ (ppm) | $\delta_{\text{agg}}$ (ppm) | Adjusted $r^2$ |
|--------------|--------------------------------------|---------------------------|-----------------------------|----------------|
| $\text{H}_a$ | $700 \pm 100$                        | $9.92 \pm 0.01$           | $10.198 \pm 0.004$          | 0.9924         |
| $\text{H}_b$ | $770 \pm 90$                         | $9.641 \pm 0.007$         | $9.831 \pm 0.002$           | 0.9894         |
| $\text{H}_c$ | $600 \pm 100$                        | $9.09 \pm 0.04$           | $9.72 \pm 0.01$             | 0.9897         |
|              | $700 \pm 200$ (average)              |                           |                             |                |



### 3.6. Estimation of DP for supramolecular ladder polymer **1**

Based on the isodesmic model, the weight-average degree of polymerization  $DP_w$  can be estimated by the association constant  $K_{\text{ass}}$  and the initial concentration  $c_t$ .

$$DP_w = \sqrt{1 + 4K_{\text{ass}}c_t}$$

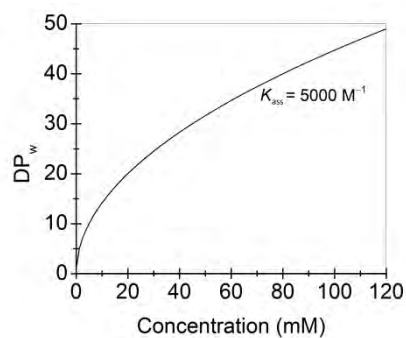

**Figure S14.** Plot of theoretical  $DP_w$  against initial concentration at  $K_{\text{ass}} = 5000 \text{ M}^{-1}$ .

4. Size exclusion chromatography

SEC analyses were conducted on Styragel columns (HR1, HR2, HR3, and HR4 7.8 × 300 mm in serial) at 40 °C using THF as eluent with flow rate 1.0 mL/min on a HPLC pump equipped with a UV absorbance detector. The concentrations of the injected samples were 1 mg/mL. Under such a highly diluted concentration, compounds **1** and **4** are expected to exist in the monomeric state.

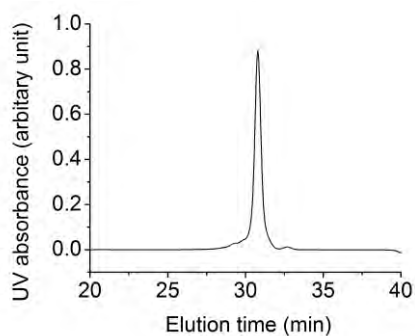

**Figure S15.** Size exclusion chromatogram of compound **4**.

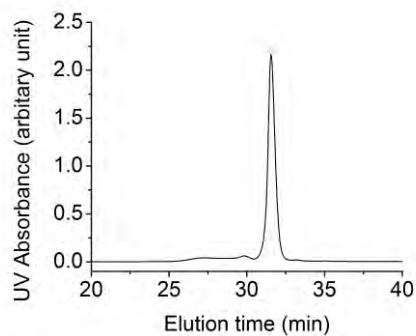

**Figure S16.** Size exclusion chromatogram of metallomacrocycle **1**.

5. Differential scanning calorimetry

The analysis was carried out on a differential scanning calorimeter and the sample was purged with N<sub>2</sub> during the analysis. The scan rate is 10 °C/min.

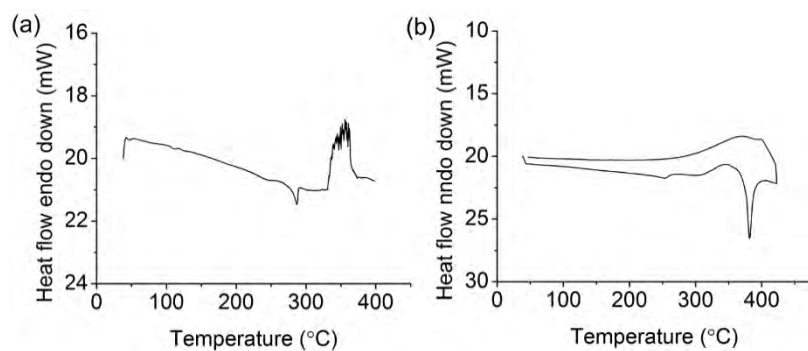

**Figure S17.** DSC curves of (a) supramolecular polymer **3** and (b) supramolecular ladder polymer **1**.

6. Viscosity measurements

Viscometry measurements were performed on an Ubbelohde viscometer in either pure  $\text{CHCl}_3$  or 2%  $\text{CH}_3\text{OH}/\text{CHCl}_3$  at 25.0 °C as specified in the paper.

## 7. Dynamic light scattering experiments

Dynamic light scattering (DLS) experiments were performed on a modified commercial LLS spectrometer equipped with a multi- $\tau$  digital time correlator and a cylindrical 22 mW UNIPHASE He-Ne laser ( $\lambda_0 = 632$  nm). The solution of the supramolecular ladder polymer **1** in 5% CH<sub>3</sub>OH/CHCl<sub>3</sub> was filtered through a 220 nm PTFE membrane before measurements.

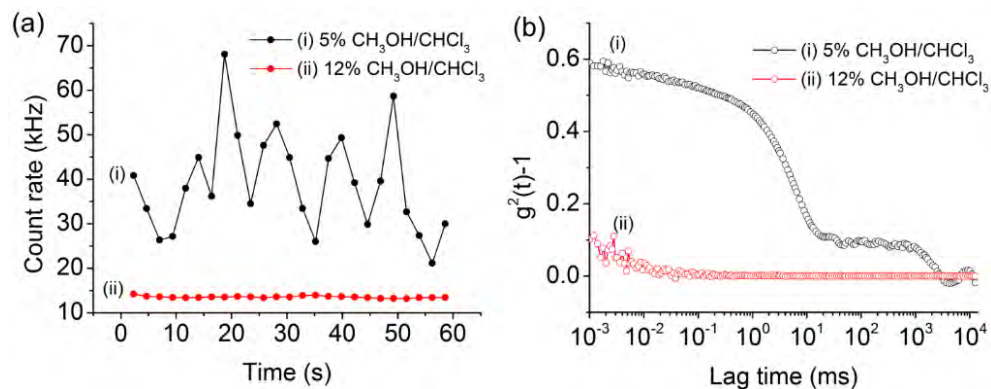

**Figure S18.** (a) Count rate fluctuation and (b) autocorrelation function of supramolecular ladder polymer **1** in (i) 5% CH<sub>3</sub>OH/CHCl<sub>3</sub> and (ii) 12% CH<sub>3</sub>OH/CHCl<sub>3</sub>.

8. Scanning electron microscopy

Scanning electron microscopic analysis of the sample solution was prepared by drop-casting on a silicon wafer, air-dried and then coated with Au particle using an Ion Sputter Coater. The images were obtained by an electron microscope. Energy-dispersive X-ray spectroscopy was employed to determine the elemental composition of the micron sized spheres obtained from the supramolecular ladder polymer **1**.

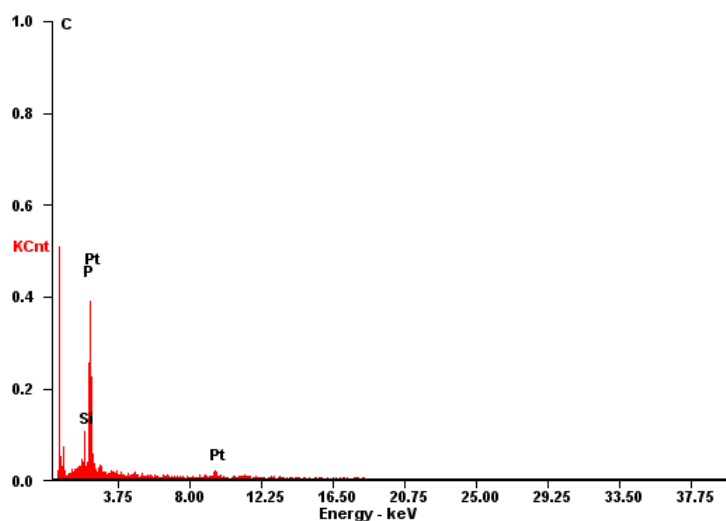

**Figure S19.** EDX spectrum of supramolecular ladder polymer **1**.

**Table S5.** Elemental analysis result of supramolecular ladder polymer **1** by EDX.<sup>[a]</sup>

| Element | Theoretical value | Measured value |
|---------|-------------------|----------------|
| C       | 58.66             | 67.52          |
| O       | 7.81              | 7.08           |
| P       | 5.04              | 4.35           |
| Pt      | 15.88             | 20.03          |

[a] The observed electron transition for the elements were  $K_{\alpha}$ .

## 9. UV spectroscopy

UV spectra of supramolecular polymer **3** were measured on a 100 UV-Vis spectrometer in spectrophotometric grade  $\text{CHCl}_3$  at 25 °C.

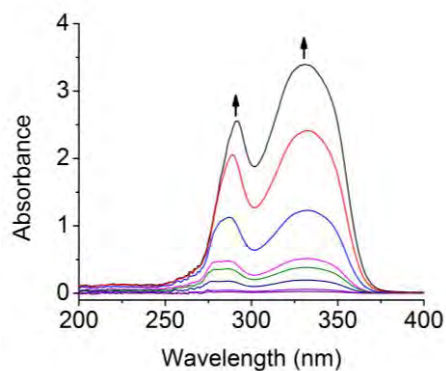

**Figure S20.** Stacked UV spectra of supramolecular polymer **3** in  $\text{CHCl}_3$  at different concentrations (0.6 – 90  $\mu\text{M}$ ).

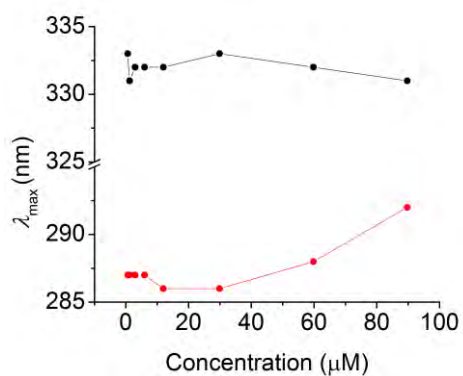

**Figure S21.** Plot of absorption maxima  $\lambda_{\text{max}}$  of supramolecular polymer **3** against concentration. The two absorption bands at  $\sim 292$  and  $\sim 331$  nm were assigned to  $\pi \rightarrow \pi^*$  transitions of the aromatic rings and metal-to-ligand charge transfer (MLCT) of the platinum(II) acetylide, respectively

10. X-ray crystal structure of compound **2** ( $R_1 = R_2 = \text{Me}$ )

Single crystal of **2** ( $R_1 = R_2 = \text{Me}$ ) was obtained by slow evaporation from methanol/ $\text{CHCl}_3$  and data were collected on a diffractometer using Mo  $K\alpha$  radiation.

X-ray crystal data for **2** ( $R_1 = R_2 = \text{Me}$ ) $\cdot\text{CHCl}_3$ :  $\text{C}_{43}\text{H}_{61}\text{Cl}_3\text{N}_4\text{O}_6\text{Si}$ ;  $M = 864.40$ ; triclinic;  $a = 9.7693(4)$ ,  $b = 11.7068(5)$ ,  $c = 21.0929(9)$  Å;  $\alpha = 98.8445(19)$ ,  $\beta = 90.879(2)$ ,  $\gamma = 93.088(2)^\circ$ ;  $V = 2395.78(17)$  Å<sup>3</sup>; space group  $P-1$ ;  $Z = 2$ ;  $\rho_{\text{calcd}} = 1.197$  Mg m<sup>-3</sup>;  $T = 296(2)$  K;  $\lambda$  (Mo $K\alpha$ ) = 1.54178 Å; 70105 reflections collected; 8786 independent reflections;  $R_{\text{int}} = 0.0651$ ; observed data with  $I \geq 2\sigma(I) = 8786$ ;  $R_1 = 0.0826$ ,  $wR_2 = 0.2421$  [ $I \geq 2\sigma(I)$ ]. CCDC-1026059 contains the supplementary crystallographic data for **2** ( $R_1 = R_2 = \text{Me}$ ) $\cdot\text{CHCl}_3$ .

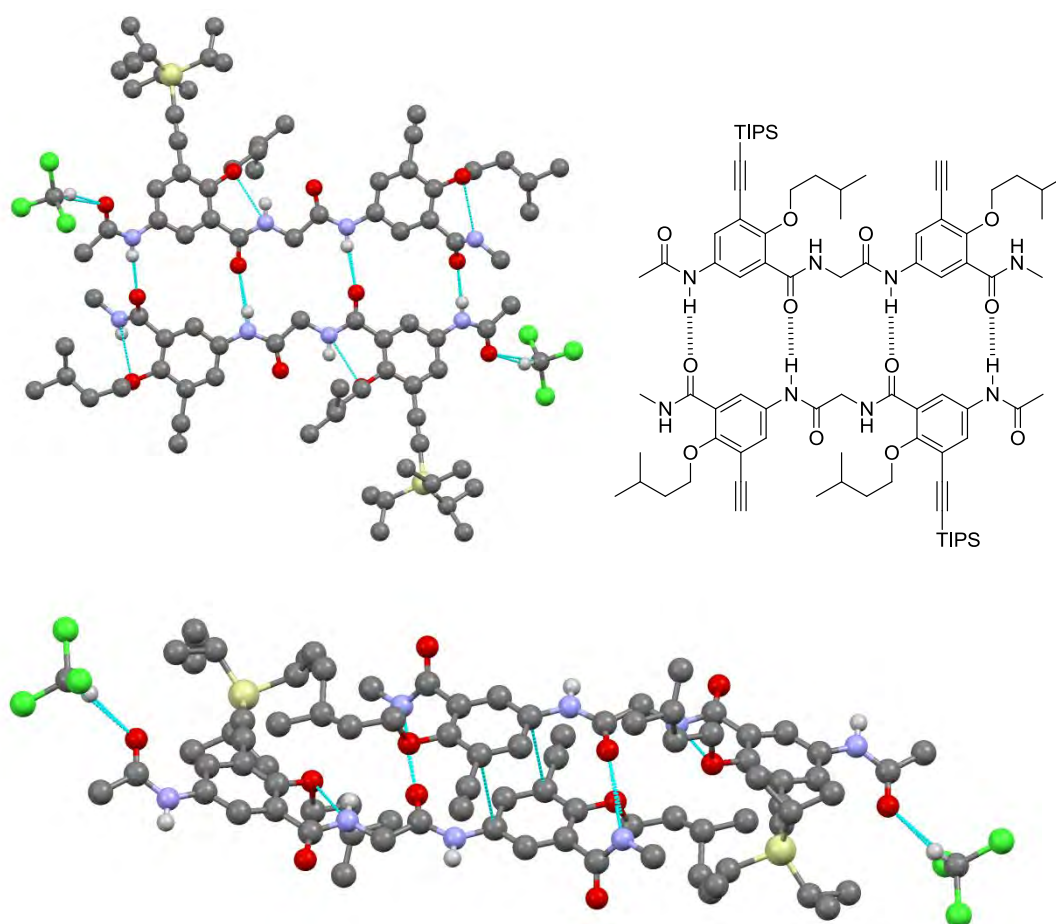

**Figure S22.** X-ray crystal structure of compound **2** ( $R_1 = R_2 = \text{Me}$ ) (top) showing the quadruple H-bonding interaction between two molecules of **2** on the same plane, and (bottom)  $\pi$ - $\pi$  stacking interaction between two molecules of **2** on different plane.



## 11. List of NMR and MS spectra

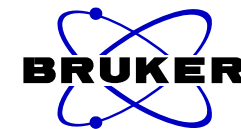

```
NAME Sun-17122011-(OH)-NO2-CO2Me
EXPNO 1
PROCNO 1
Date_ 20111217
Time 10.54
INSTRUM spect
PROBHD 5 mm PABBI 1H/
PULPROG zg30
TD 32768
SOLVENT CDCl3
NS 32
DS 2
SWH 8223.685 Hz
FIDRES 0.250967 Hz
AQ 1.9923444 sec
RG 57
DW 60.800 usec
DE 6.50 usec
TE 294.7 K
D1 1.0000000 sec
TDO 1
***** CHANNEL f1 *****
NUC1 1H
P1 7.10 usec
PL1 -2.00 dB
PLW 13.17734718 W
SFO1 400.1324710 MHz
SI 32768
SF 400.1300099 MHz
WDW EM
SSB 0
LB 0.30 Hz
GB 0
PC 1.00
```

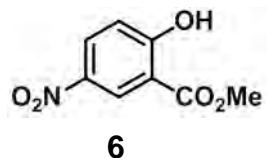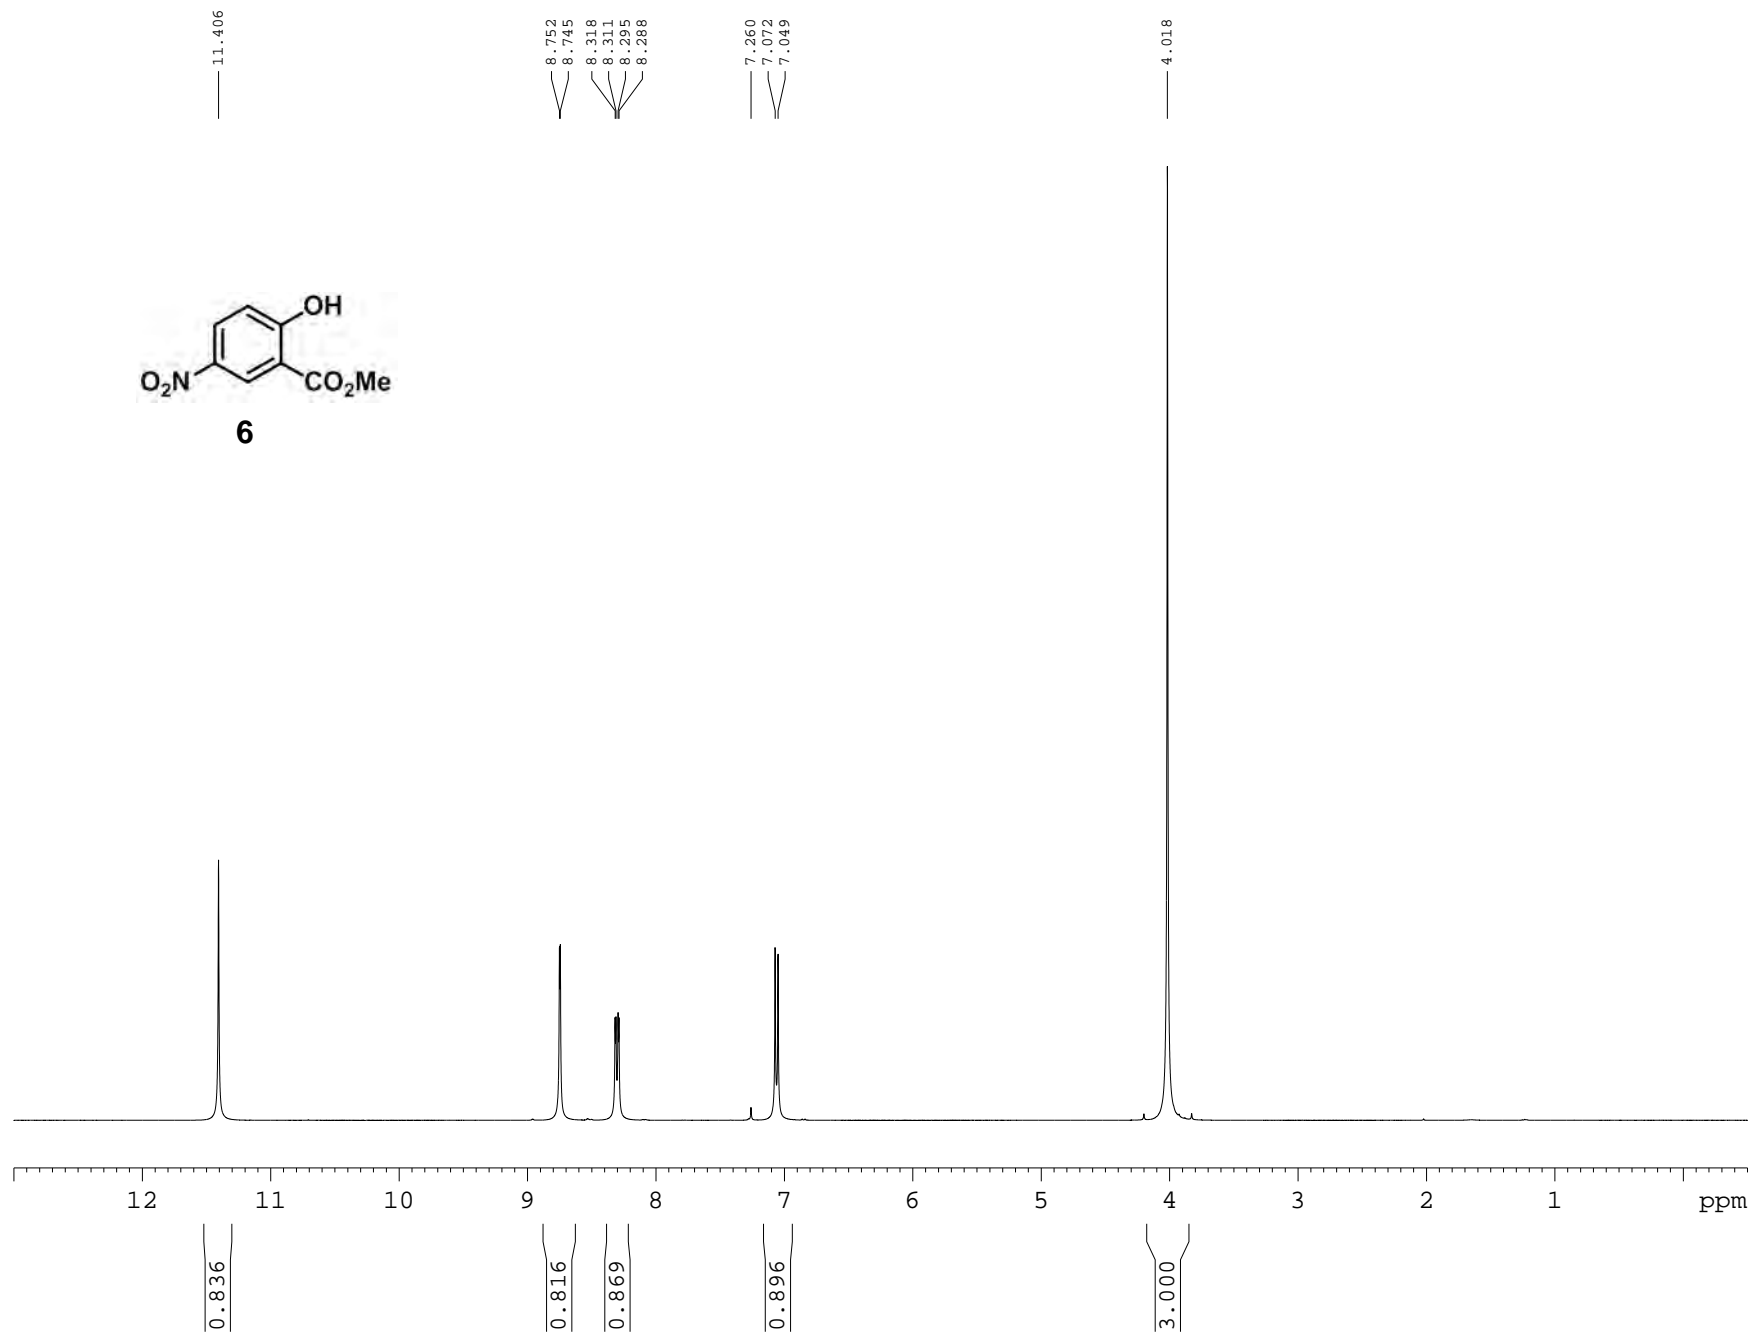

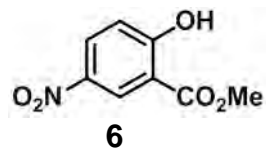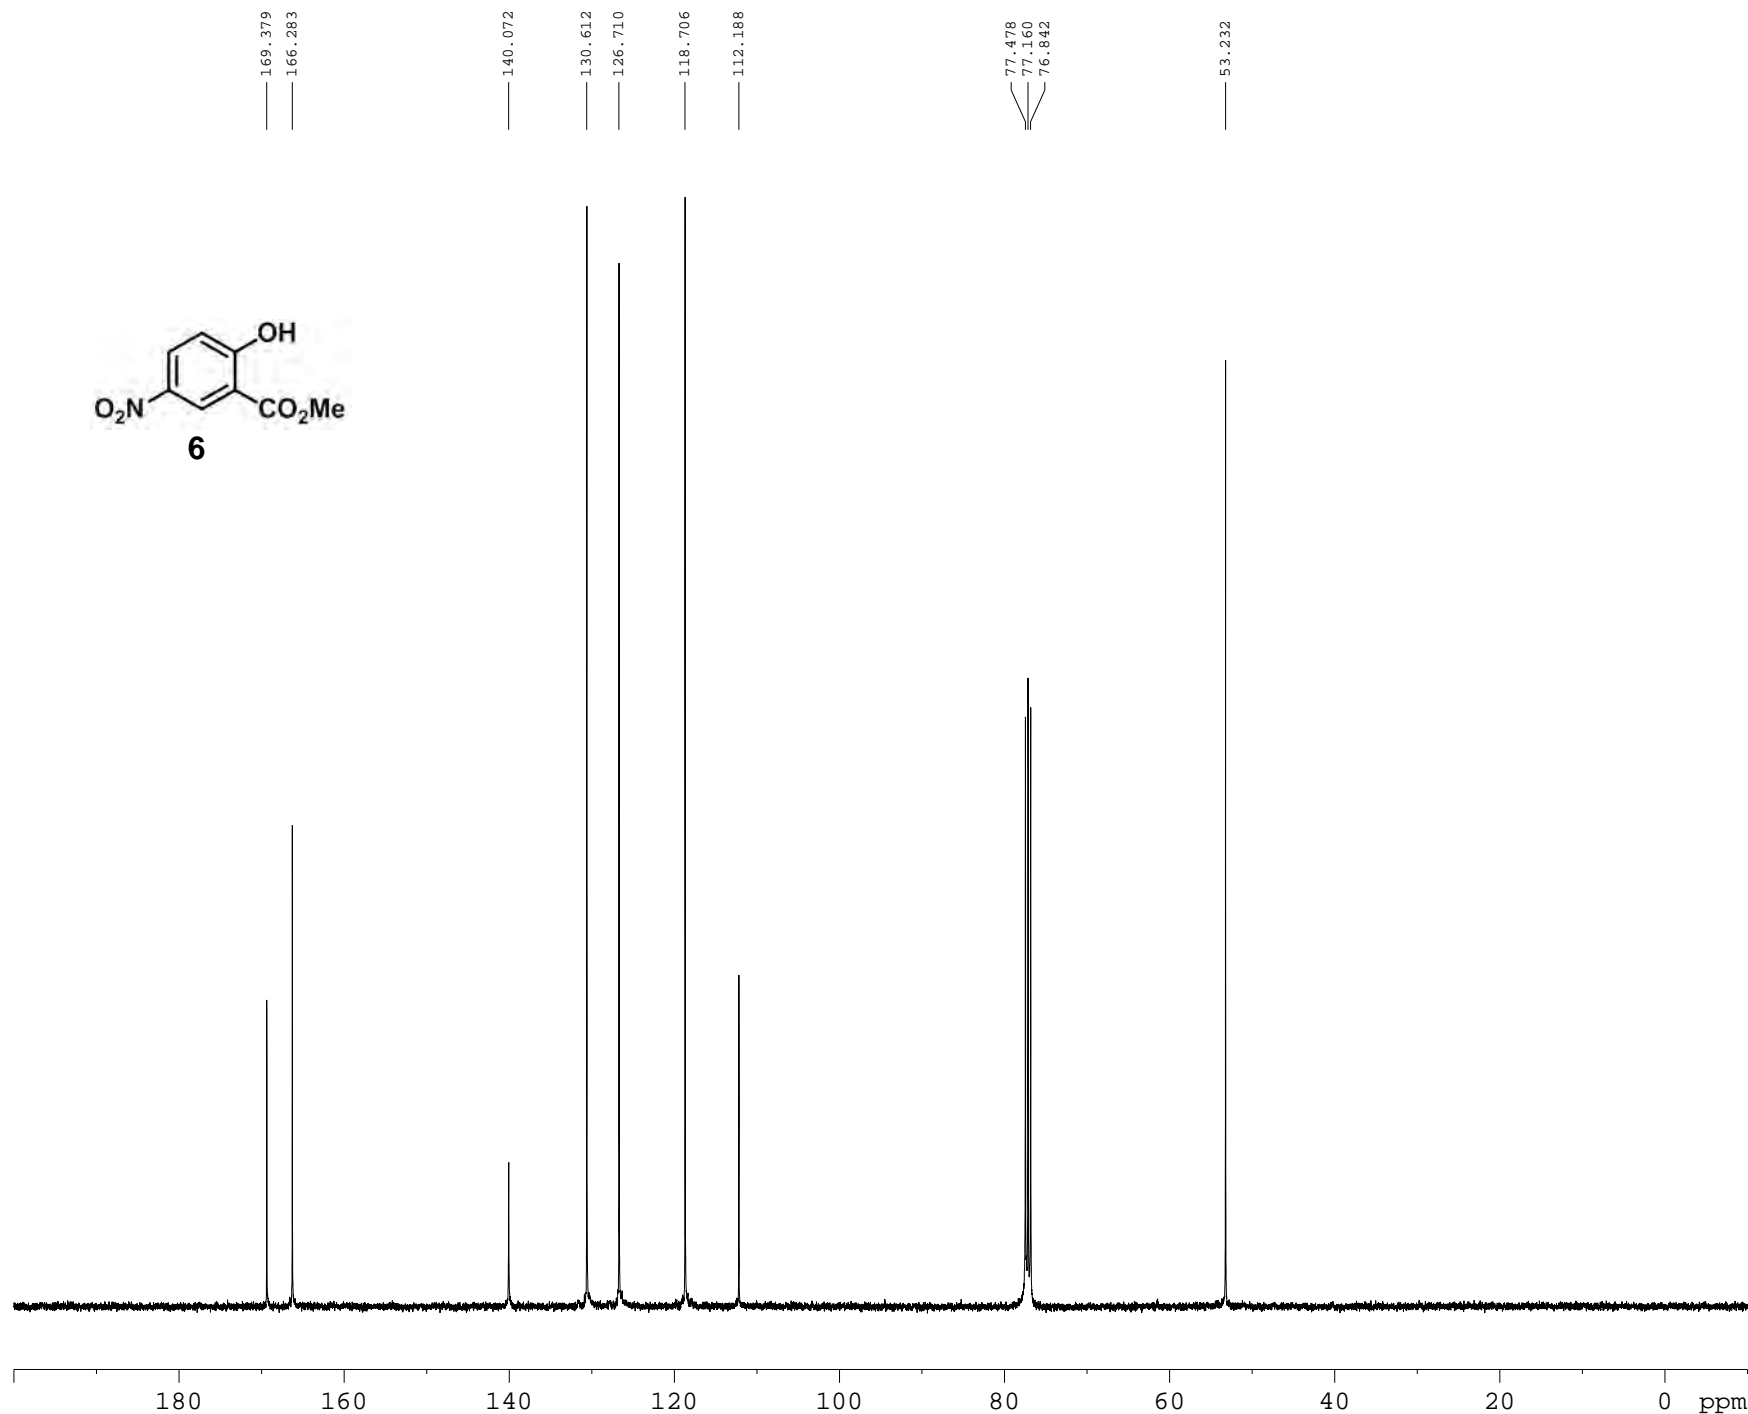

```
NAME Sun-17122011-(OH)-NO2-CO2Me
EXPNO 2
PROCNO 1
Date_ 20111217
Time 10.56
INSTRUM spect
PROBHD 5 mm PABBI 1H/
PULPROG zgpg30
TD 65536
SOLVENT CDCl3
NS 2686
DS 4
SWH 24038.461 Hz
FIDRES 0.366798 Hz
AQ 1.3631988 sec
RG 203
DW 20.800 usec
DE 6.50 usec
TE 294.8 K
D1 2.0000000 sec
D11 0.0300000 sec
TDO 1
```

```
***** CHANNEL f1 *****
NUC1 13C
P1 14.50 usec
PL1 -4.00 dB
PL1W 90.22689819 W
SFO1 100.6228298 MHz
```

```
***** CHANNEL f2 *****
CPDPRG2 waltz16
NUC2 1H
P2 90.00 usec
PL2 -2.00 dB
PL2W 20.06 dB
PL13 22.00 dB
PL2W 13.17734718 W
PL12W 0.08200268 W
PL13W 0.05245997 W
SFO2 400.1316005 MHz
SI 32768
SF 100.6127604 MHz
WDM 0
SSB 0
LB 1.00 Hz
GB 0
PC 1.40
```

hfc2009\_131016161047 #3-8 RT: 0.29-0.71 AV: 6 SM: 5G NL: 1.64E5  
T: + p ESI Full ms [ 79.50-500.50]

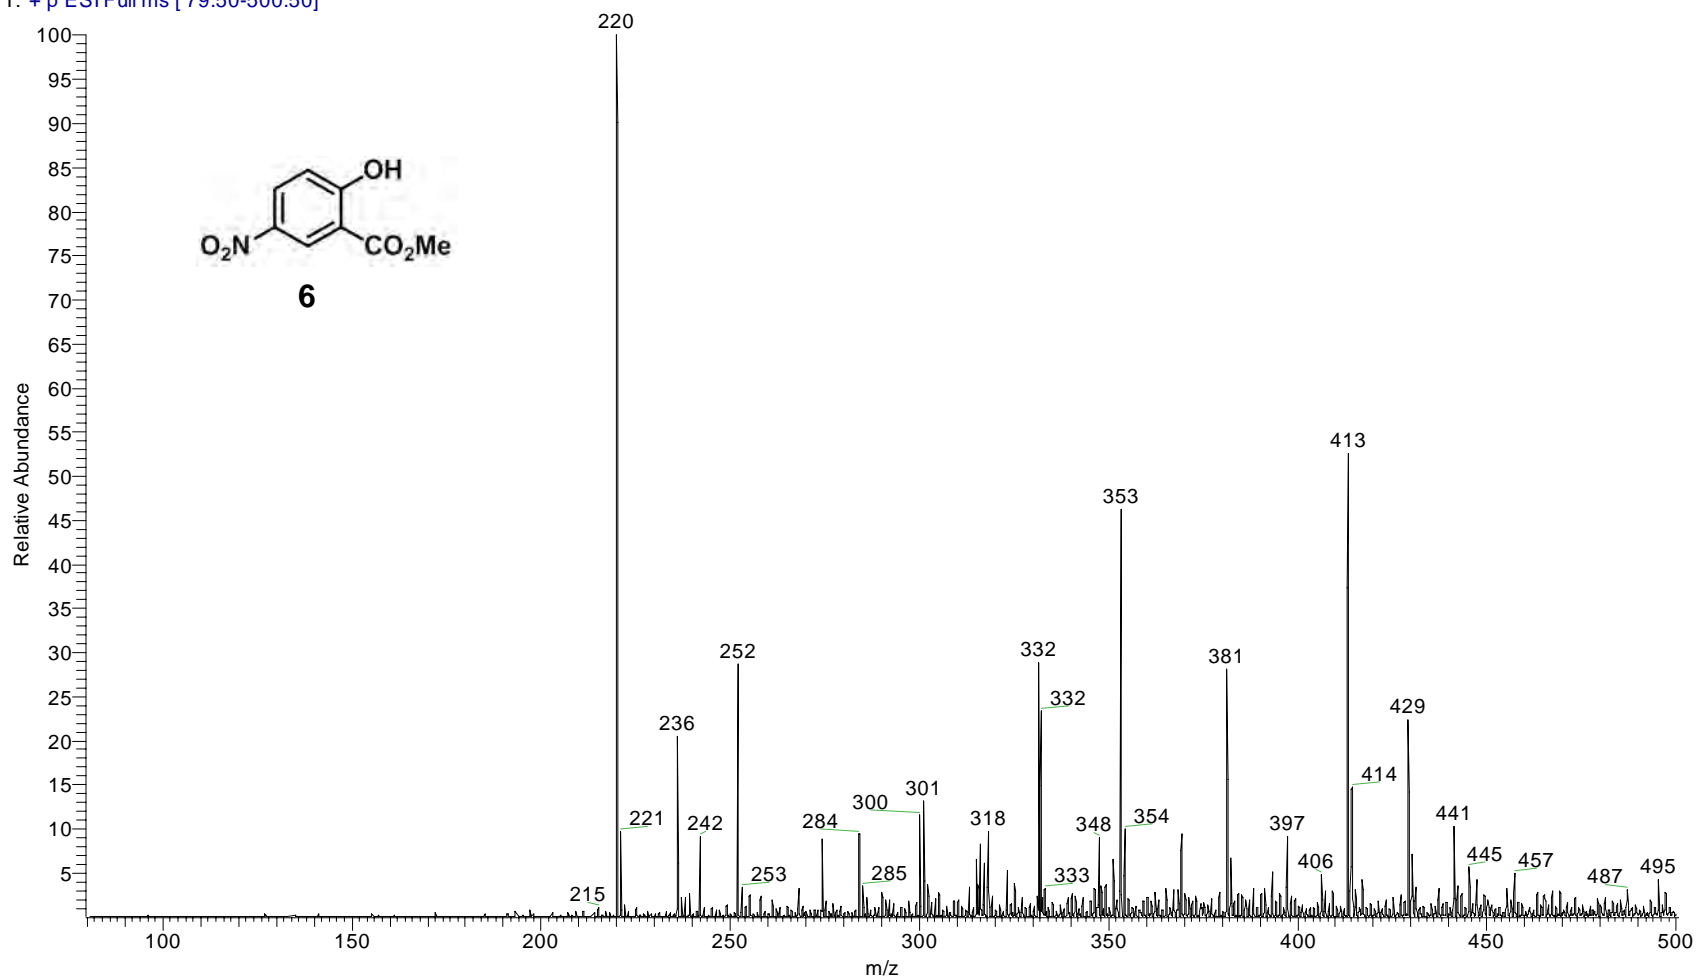

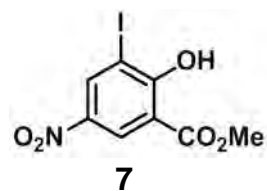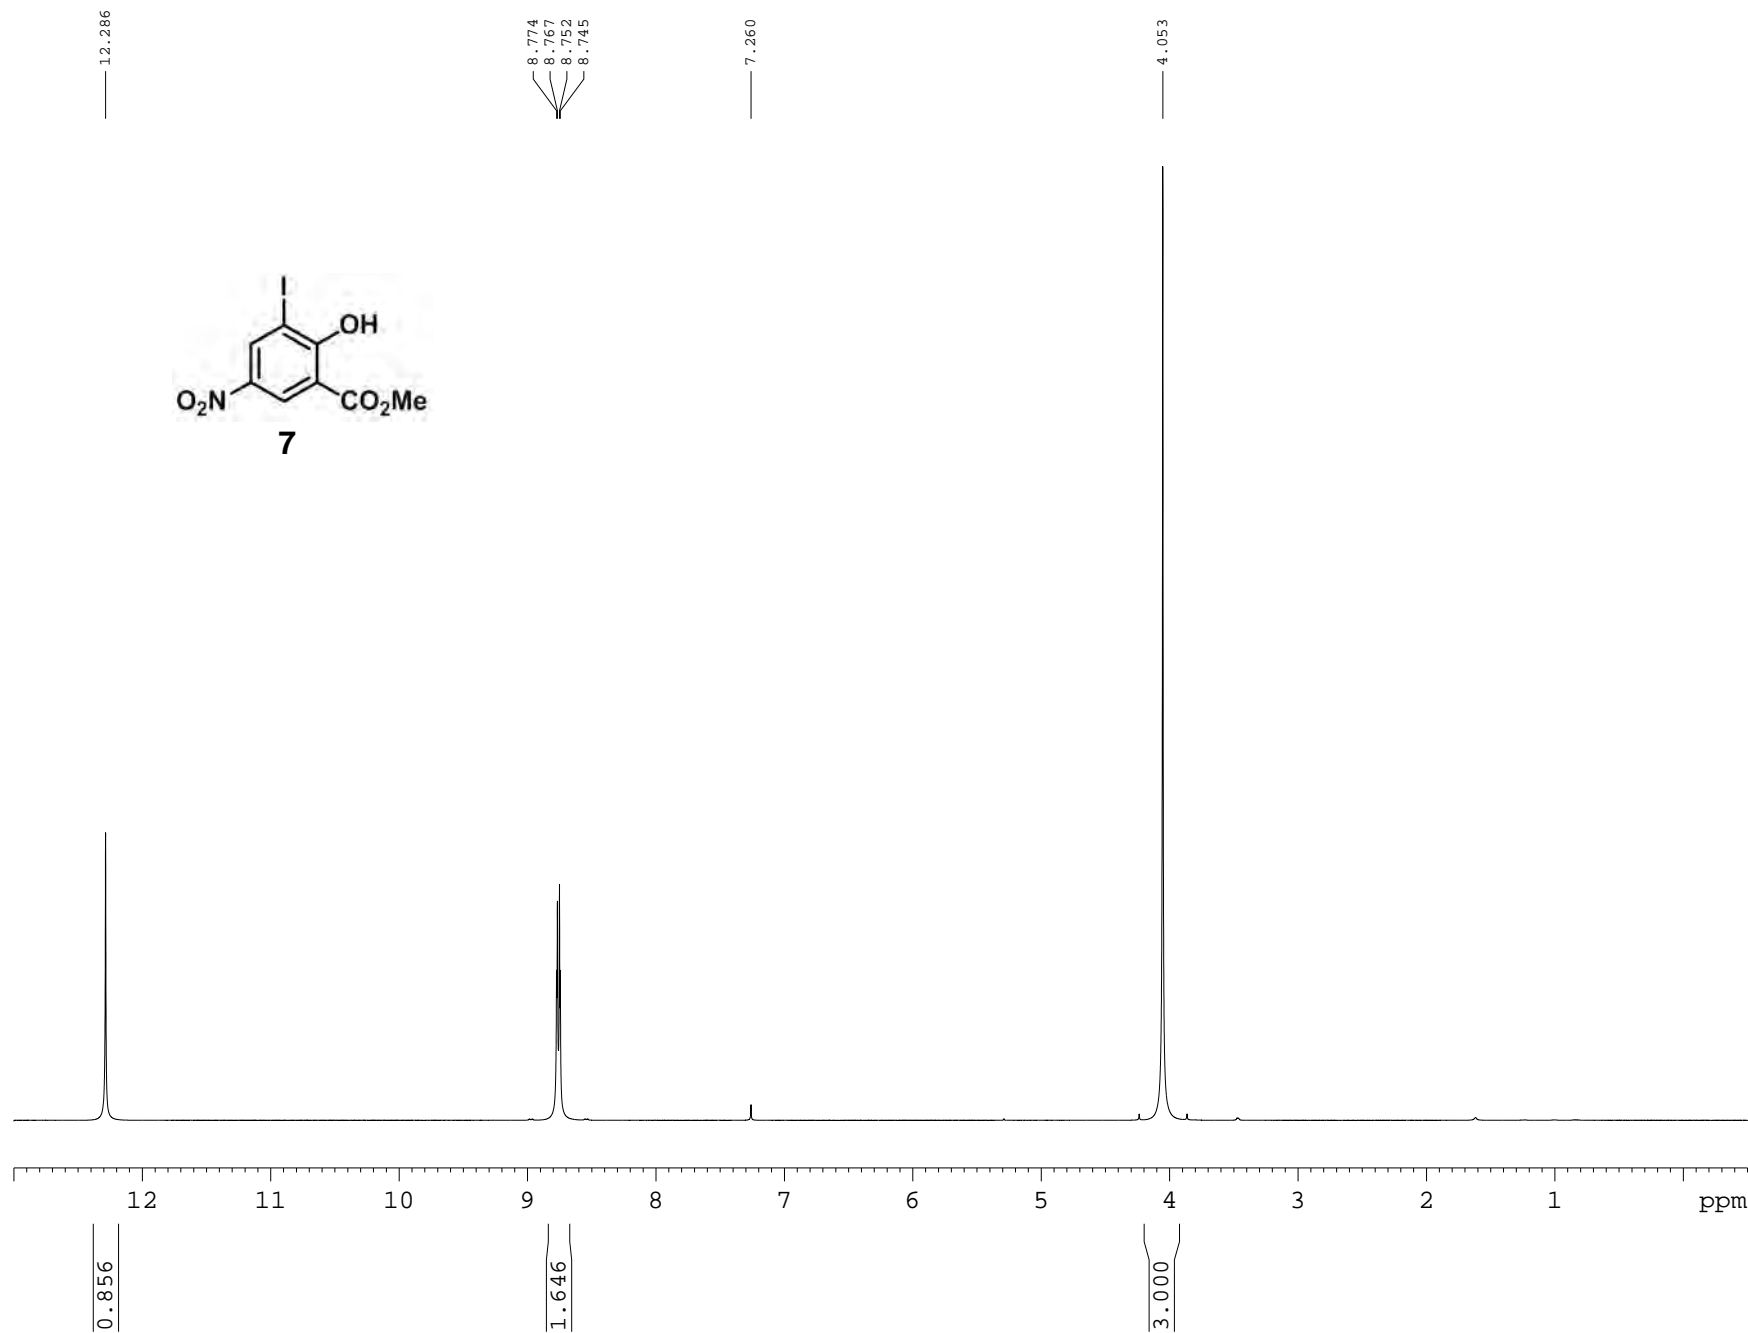

```
NAME Sun-18122011-(I,OH)-NO2-CO2Me
EXPNO 1
PROCNO 1
Date_ 20111218
Time 20.38
INSTRUM spect
PROBHD 5 mm PABBI 1H/
PULPROG zg30
TD 32768
SOLVENT CDCl3
NS 32
DS 2
SWH 8223.685 Hz
FIDRES 0.250967 Hz
AQ 1.5921444 sec
RG 80.6
DW 60.800 usec
DE 5.50 usec
TE 294.5 K
D1 1.00000000 sec
TDO 1

***** CHANNEL f1 *****
NUC1 1H
P1 7.10 usec
PL1 -2.00 dB
PLW 13.17734718 W
SFO1 400.1324710 MHz
SI 32768
SF 400.1300099 MHz
WDW EM
SSB 0
LB 0.30 Hz
GB 0
PC 1.00
```

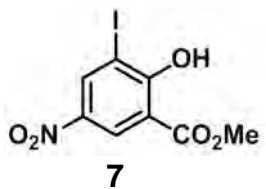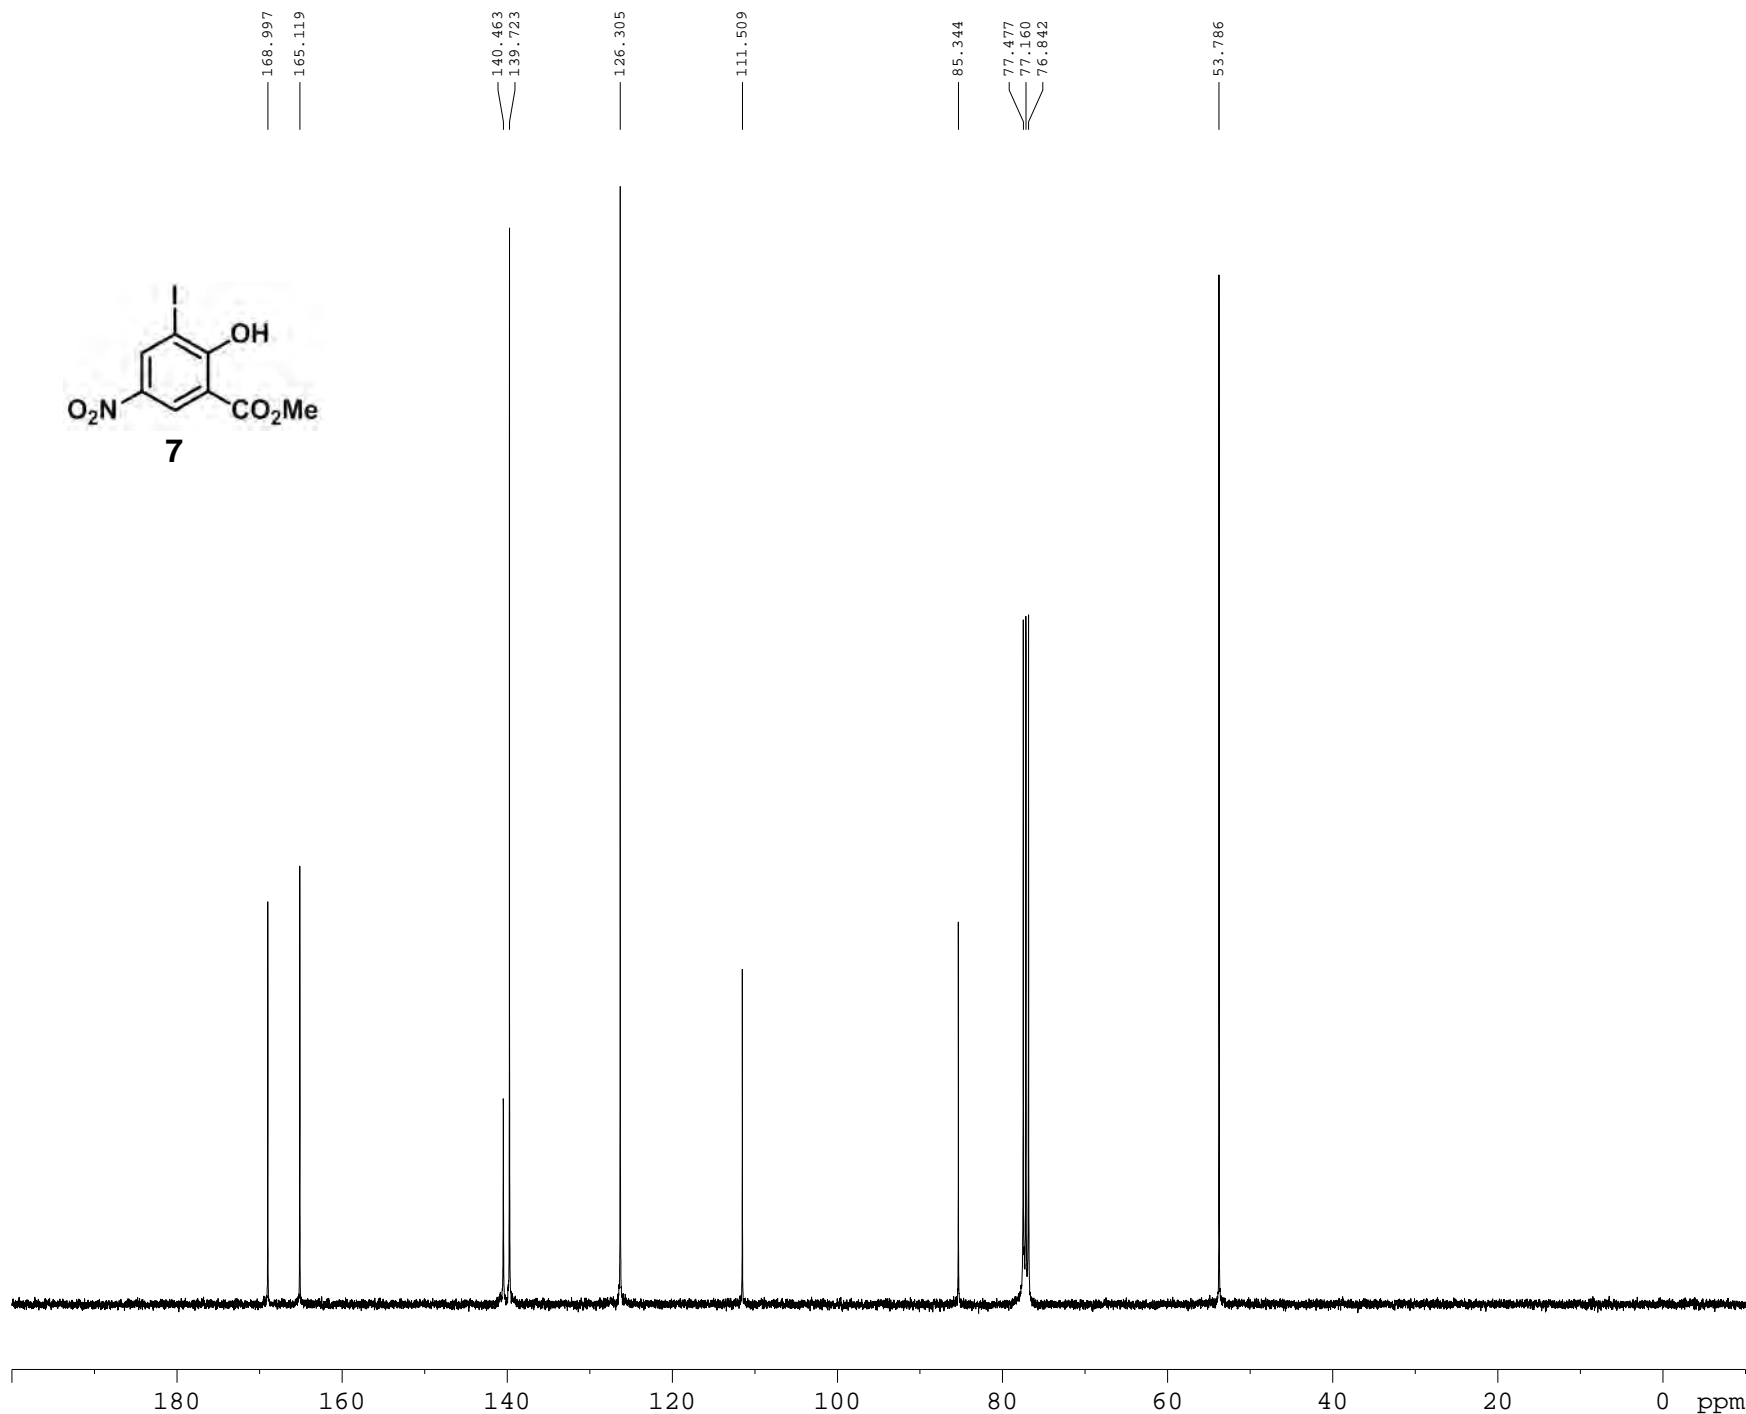

S46



```

NAME Sun-18122011-(I,OH)-NO2-CO2Me
EXPNO 2
PROCNO 1
Date_ 20111218
Time 20.43
INSTRUM spect
PROBHD 5 mm PABBI 1H/
PULPROG zgpg30
TD 65536
SOLVENT CDCl3
NS 2120
DS 4
SWH 24038.461 Hz
FIDRES 0.366798 Hz
AQ 1.363388 sec
RG 203
DM 20.800 usec
DE 5.50 usec
TE 294.8 K
D1 2.0000000 sec
D11 0.0300000 sec
TDO 1

===== CHANNEL f1 =====
NUC1 13C
P1 14.50 usec
PL1 -4.00 dB
PL1W 90.22689819 W
SFO1 100.6228298 MHz

===== CHANNEL f2 =====
CPDPRG2 waltz16
NUC2 1H
PCPD2 90.00 usec
PL2 -2.00 dB
PL12 20.06 dB
PL13 22.00 dB
PL2W 13.17734718 W
PL1W 0.0520268 W
SFO2 400.1316005 MHz
SI 32768
SF 100.6127624 MHz
WDW EM
SSB 0
LB 1.00 Hz
GB 0
PC 1.40

```

hfc1481\_120712113215 #4 RT: 0.37 AV: 1 SM: 5G NL: 3.95E5  
T: + p ESI Full ms [ 99.50-800.50]

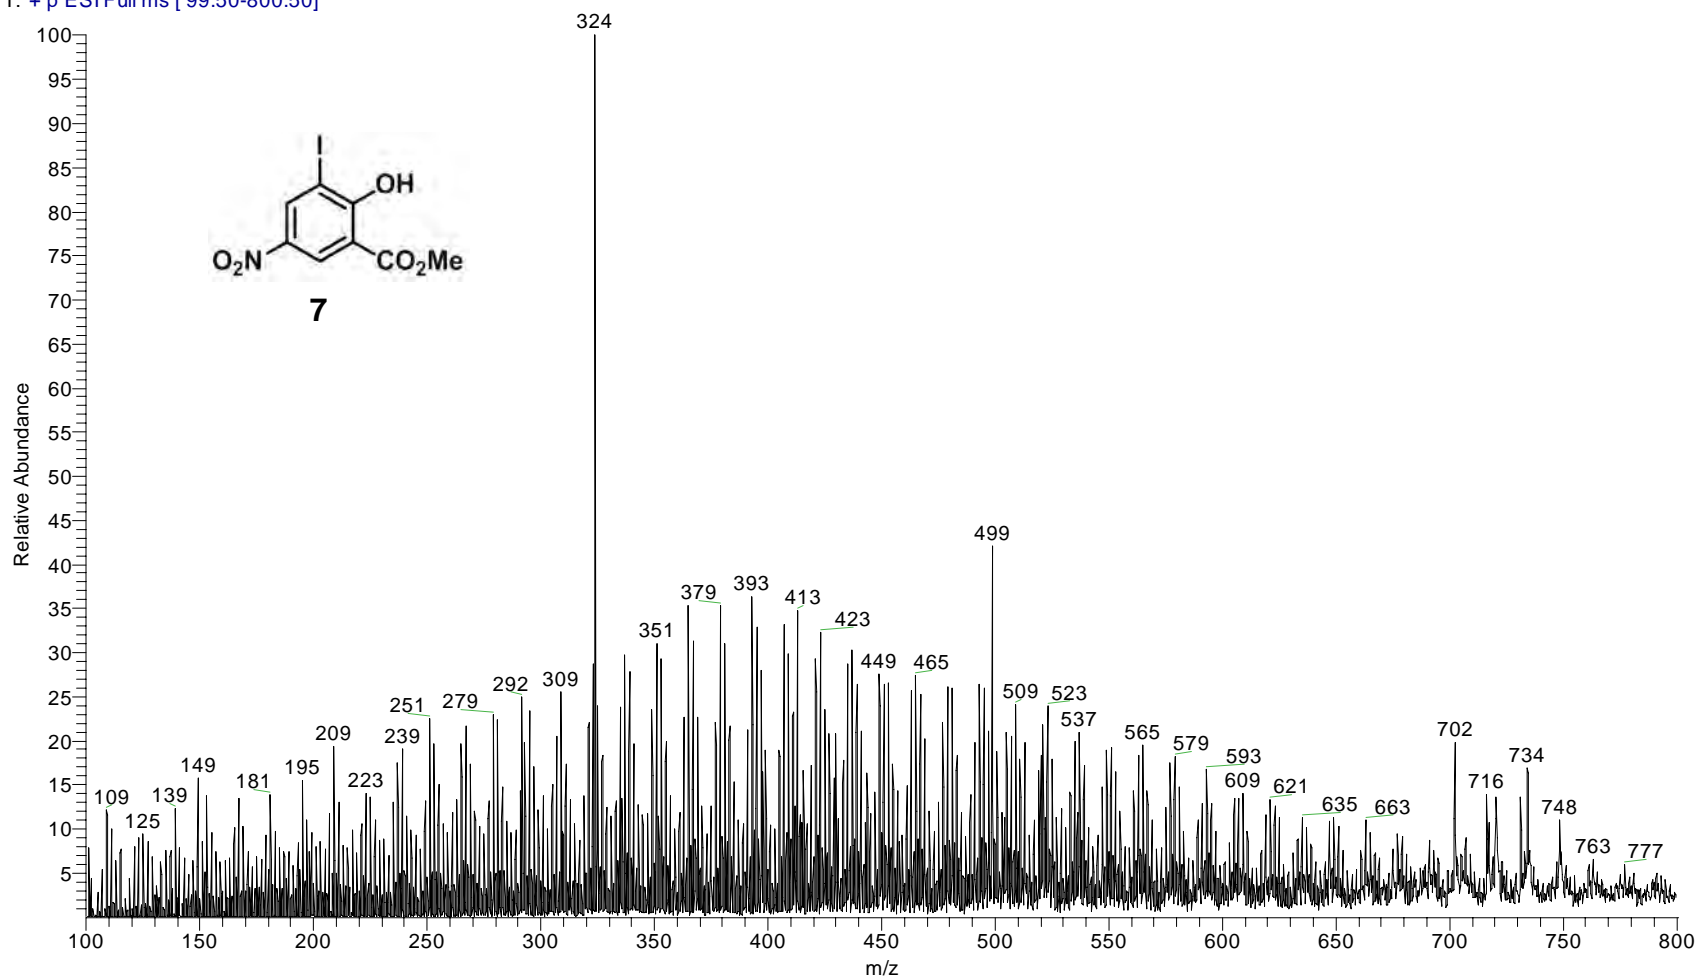

8.794  
8.787  
8.657  
8.650

7.260

4.113  
4.096  
4.080  
3.969

1.958  
1.941  
1.924  
1.908  
1.891  
1.874  
1.858  
1.843  
1.806  
1.790  
1.773  
1.545  
0.999  
0.983

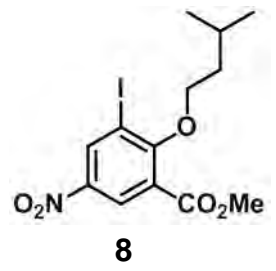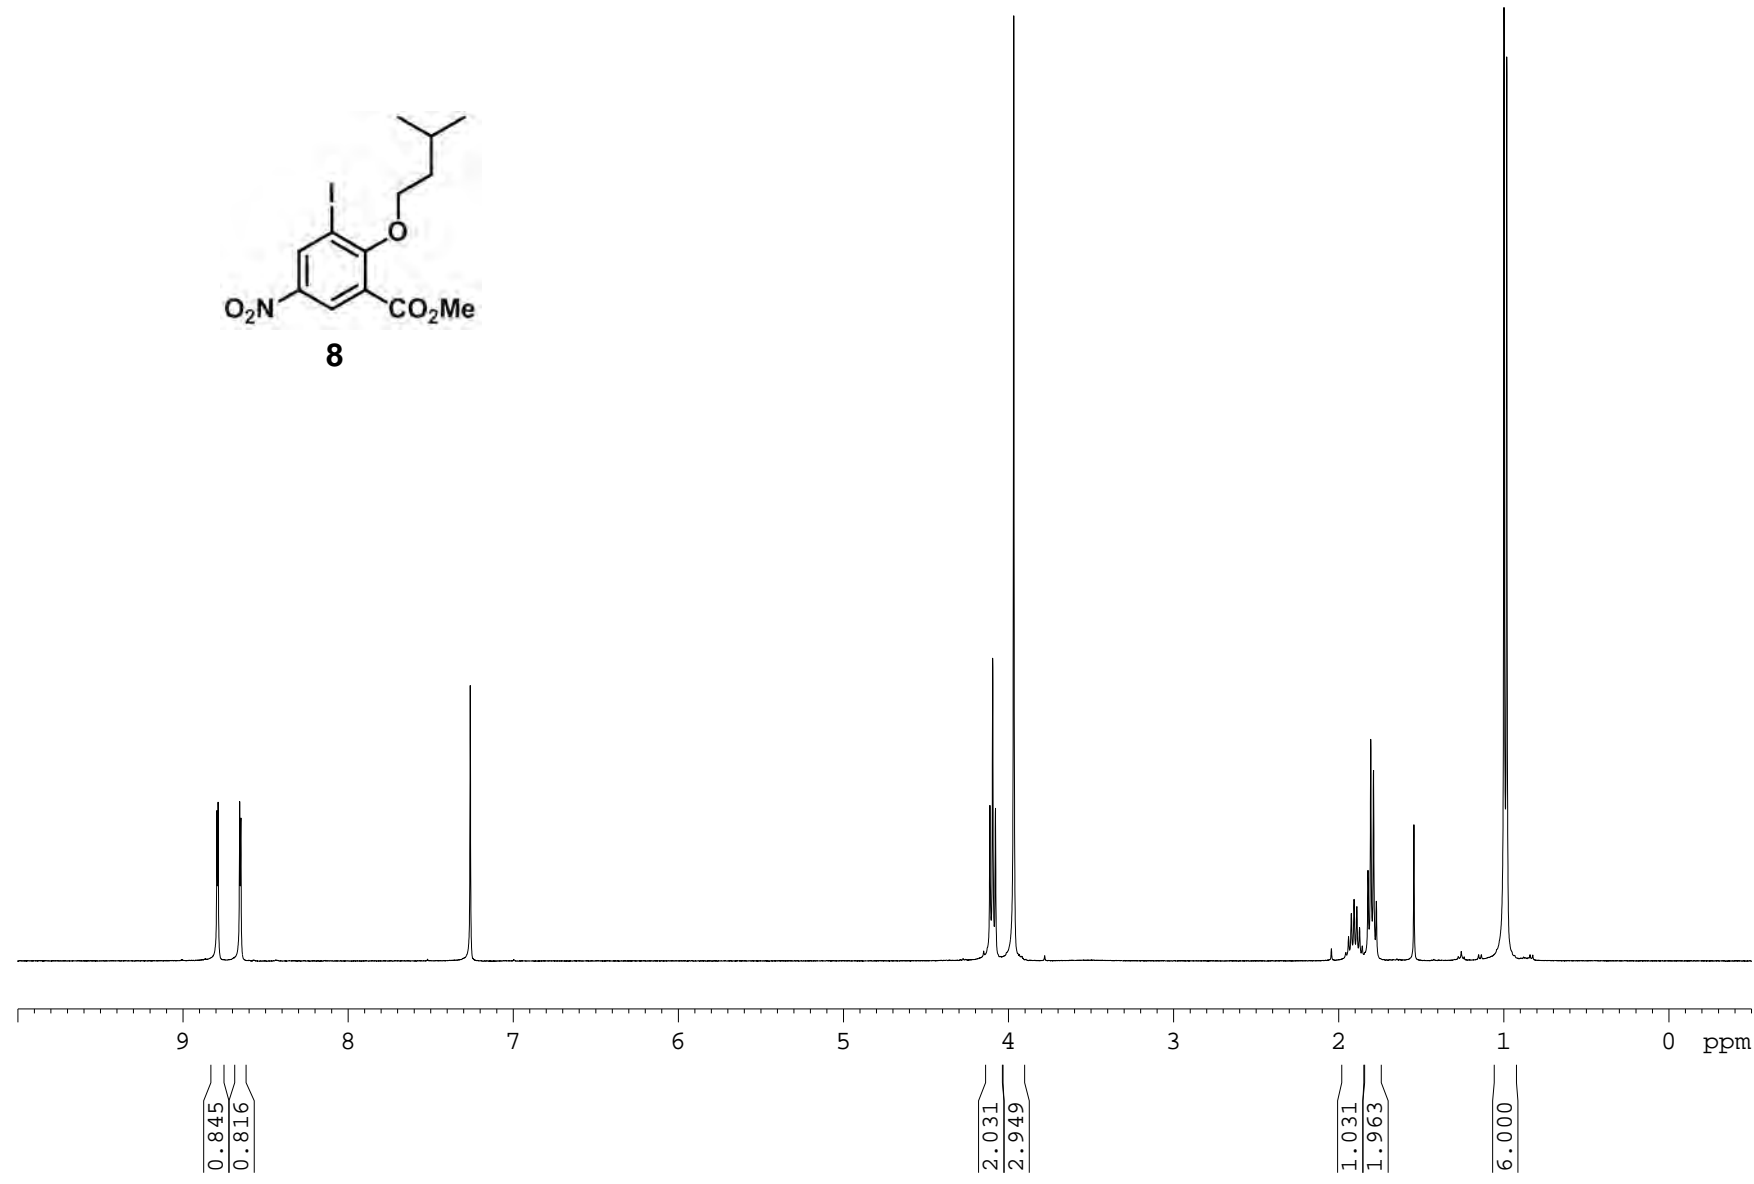

0.845  
0.816

2.031  
2.949

1.031  
1.963

6.000

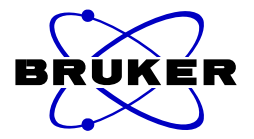

```
NAME Sun-17012013-(I)-NO2-CO2Me
EXPNO 1
PROCNO 1
Date_ 20130117
Time 17.44
INSTRUM spect
PROBHD 5 mm PABBO BH-
PULPROG zg30
TD 32768
SOLVENT CDCl3
NS 32
DS 2
SWH 8223.685 Hz
FIDRES 0.250967 Hz
AQ 1.9923444 sec
RG 144
DW 60.800 usec
DE 6.50 usec
TE 296.0 K
D1 1.0000000 sec
TDO 1
***** CHANNEL f1 *****
NUC1 1H
P1 14.00 usec
PL1 -1.00 dB
PL1W 13.56617069 W
SFO1 400.1924713 MHz
SI 32768
SF 400.1900146 MHz
WDW EM
SSB 0
LB 0.10 Hz
GB 0
PC 1.00
```



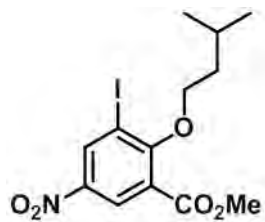

8

163.814  
163.507

143.197

137.635

127.279  
124.874

94.053

77.478  
77.160  
76.841  
74.918

53.018

38.814

24.797  
22.628



```

NAME      Sun-17012013-(I)-NO2-CO2Me
EXPNO     2
PROCNO    1
Date_     20130117
Time      22.55
INSTRUM   spect
PROBHD    5 mm PABBO BB-
PULPROG   zgpg30
TD         65536
SOLVENT   CDCl3
NS         597
DS         4
SWH        24038.461 Hz
FIDRES     0.356798 Hz
AQ          1.3631988 sec
RG          228
DW          20.800 usec
DE          6.50 usec
TE          296.6 K
D1          2.0000000 sec
D11         0.0300000 sec
TDO        1
  
```

```

===== CHANNEL f1 =====
NUC1       13C
P1          9.90 usec
PL1        -2.00 dB
PL1W       55.33689499 W
SFO1       100.6379183 MHz
  
```

```

===== CHANNEL f2 =====
CPDPRG2    waltz16
NUC2        1H
PCPD2       90.00 usec
PL2         -1.00 dB
PL12        15.15 dB
PL13        18.62 dB
PL2W        13.56617069 W
PL12W        0.32844096 W
PL13W        0.14806664 W
SFO2        400.1916008 MHz
SI          32768
SF          100.6278571 MHz
MWM         BM
SSB         0
LB          1.00 Hz
GB          0
PC          1.40
  
```

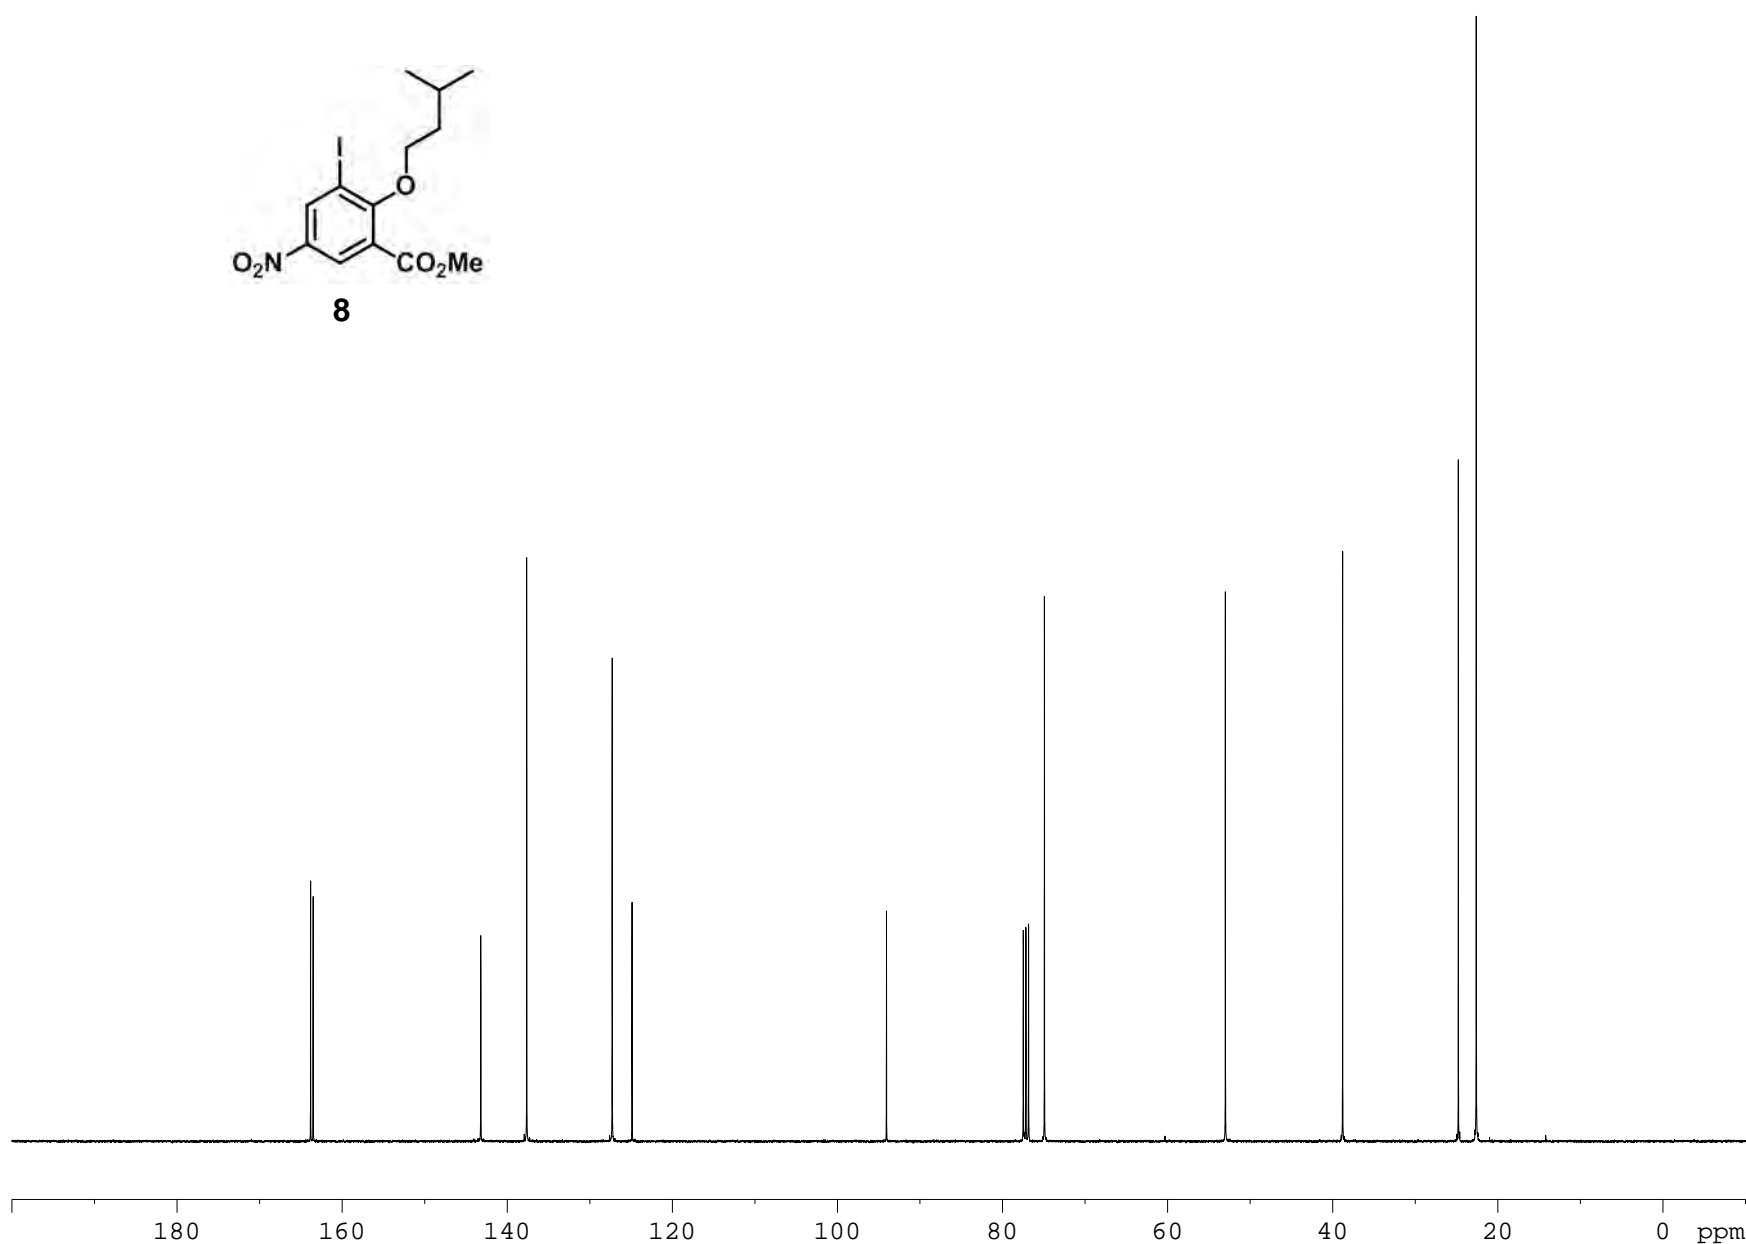

hfc2049 #5-7 RT: 0.46-0.63 AV: 3 SM: 5G NL: 1.13E6  
T: + p ESI Full ms [ 79.50-800.50]

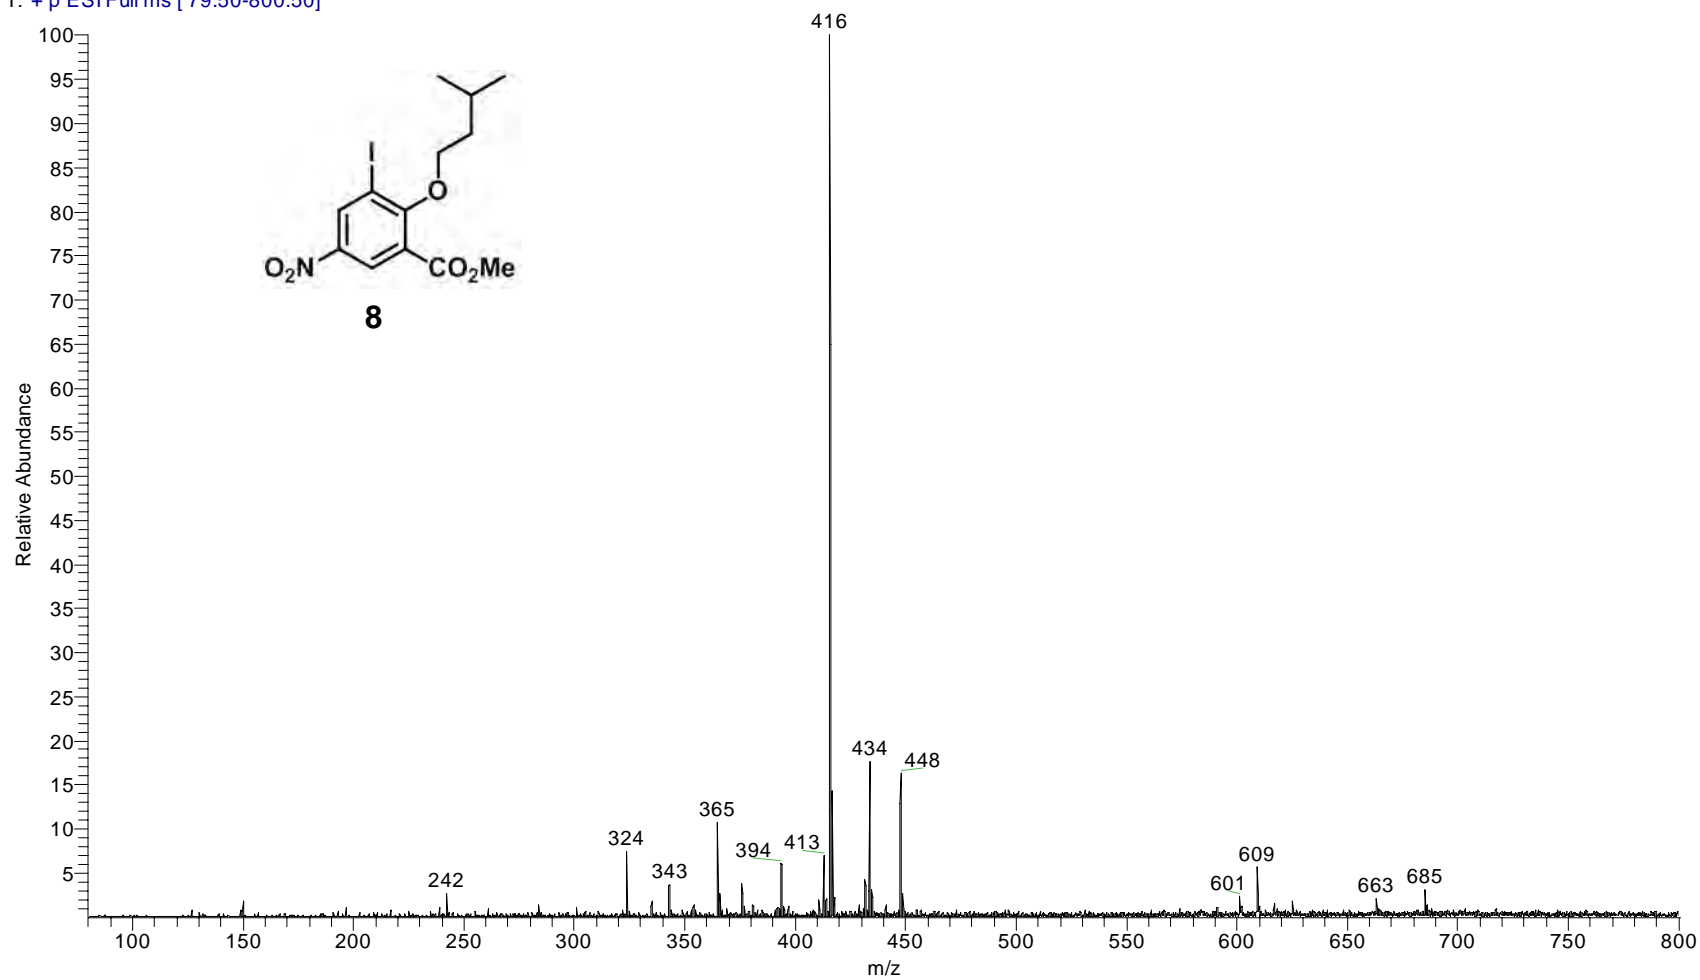

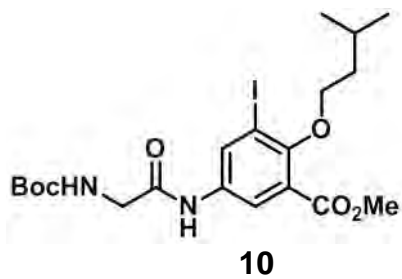

8.509  
8.216  
7.855  
7.849  
7.260

5.359

3.954  
3.938  
3.922  
3.891

1.926  
1.909  
1.893  
1.876  
1.859  
1.843  
1.826  
1.774  
1.758  
1.741  
1.723  
1.710  
1.474  
0.982  
0.966

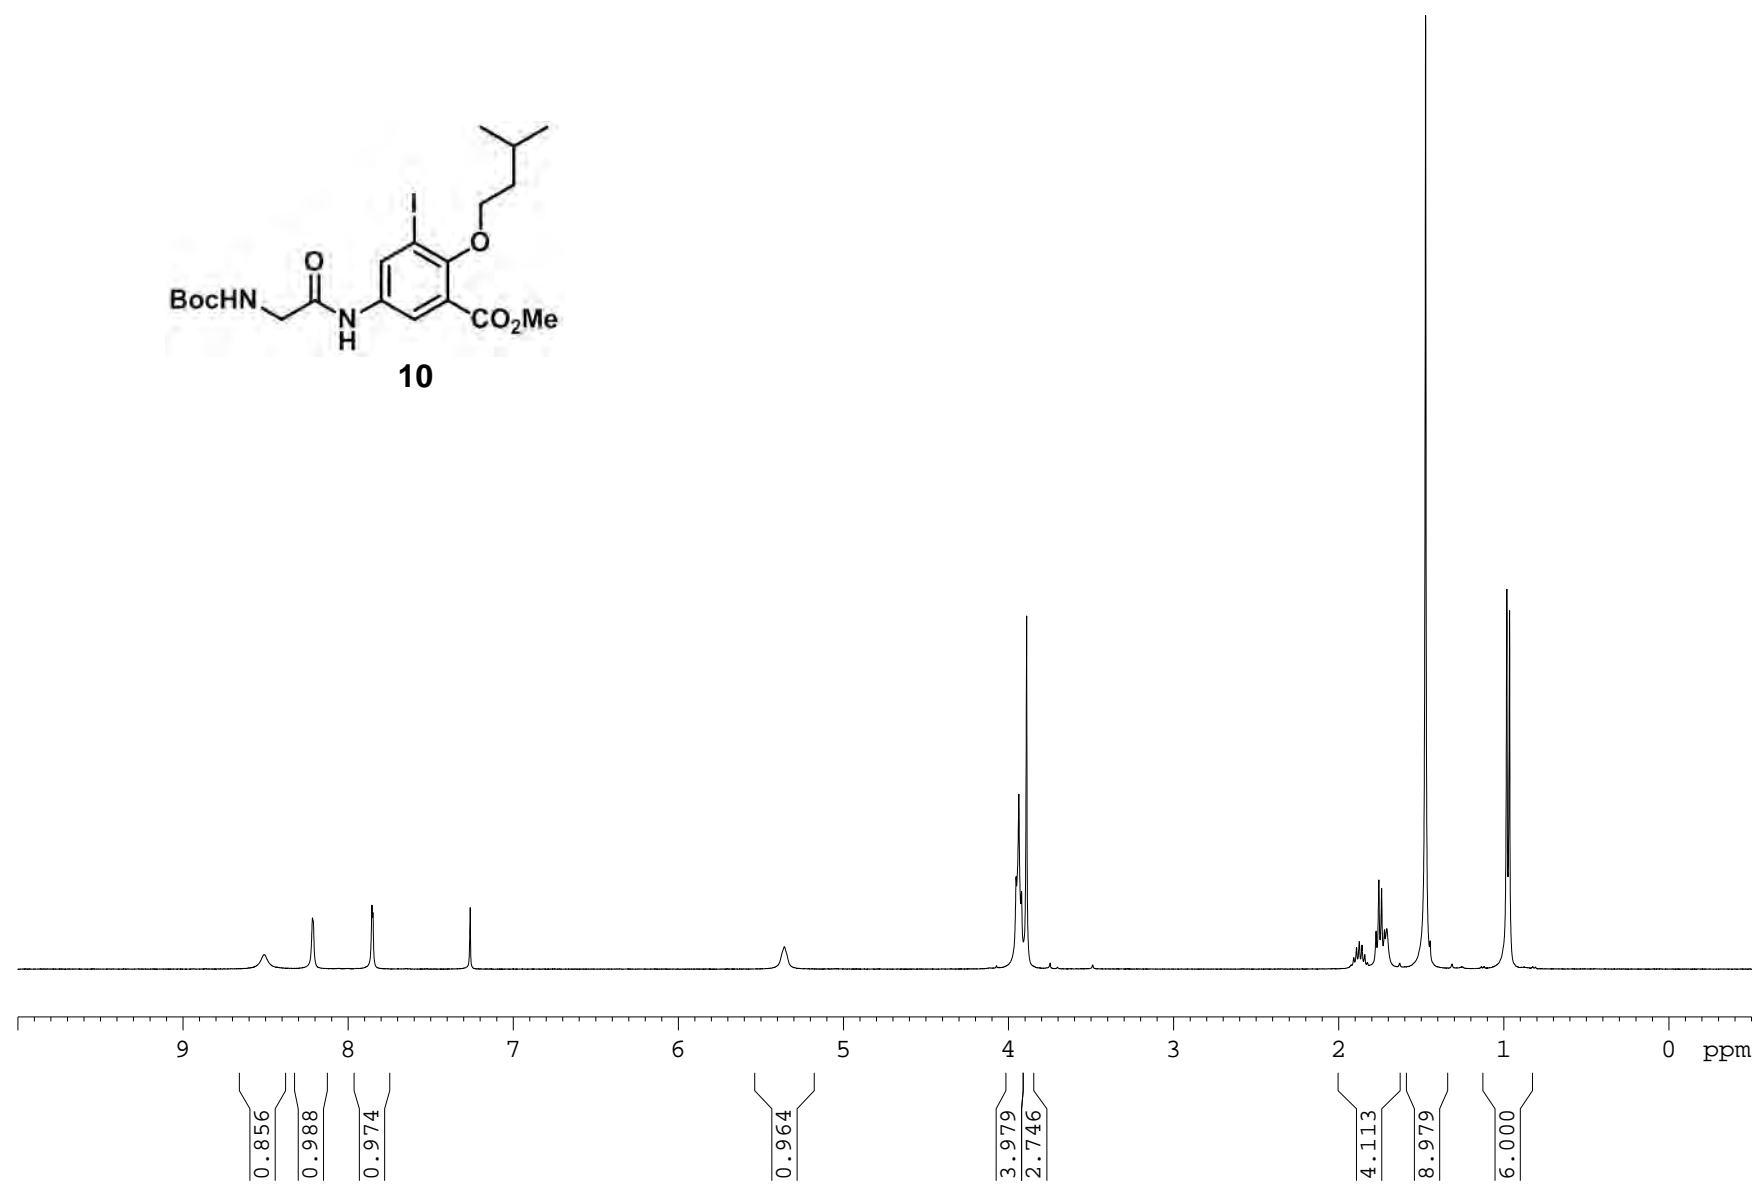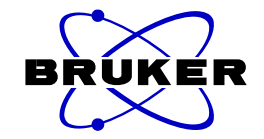

```

NAME Sun-01052014-(1)-BOC-CO2Me
EXPNO 1
PROCNO 1
Date_ 20140501
Time 21.08
INSTRUM spect
PROBHD 5 mm PABBO BH-
PULPROG zg30
TD 32768
SOLVENT CDCl3
NS 16
DS 2
SWH 8223.685 Hz
FIDRES 0.250967 Hz
AQ 1.9923444 sec
RG 90.5
DW 60.800 usec
DE 6.50 usec
TE 295.5 K
D1 1.0000000 sec
TDO 1
***** CHANNEL f1 *****
NUC1 1H
P1 14.00 usec
PL1 -1.00 dB
PLW 13.56617069 W
SF01 400.1924713 MHz
SI 32768
SF 400.1900146 MHz
WDW EM
SSB 0
LB 0.30 Hz
GB 0
PC 1.00

```

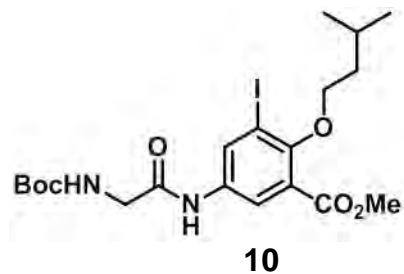

168.119  
165.459  
156.723  
154.923  
134.606  
134.375  
125.239  
123.260  
94.402  
80.839  
77.477  
77.160  
76.841  
74.106  
52.633  
45.199  
38.946  
28.425  
24.927  
22.852

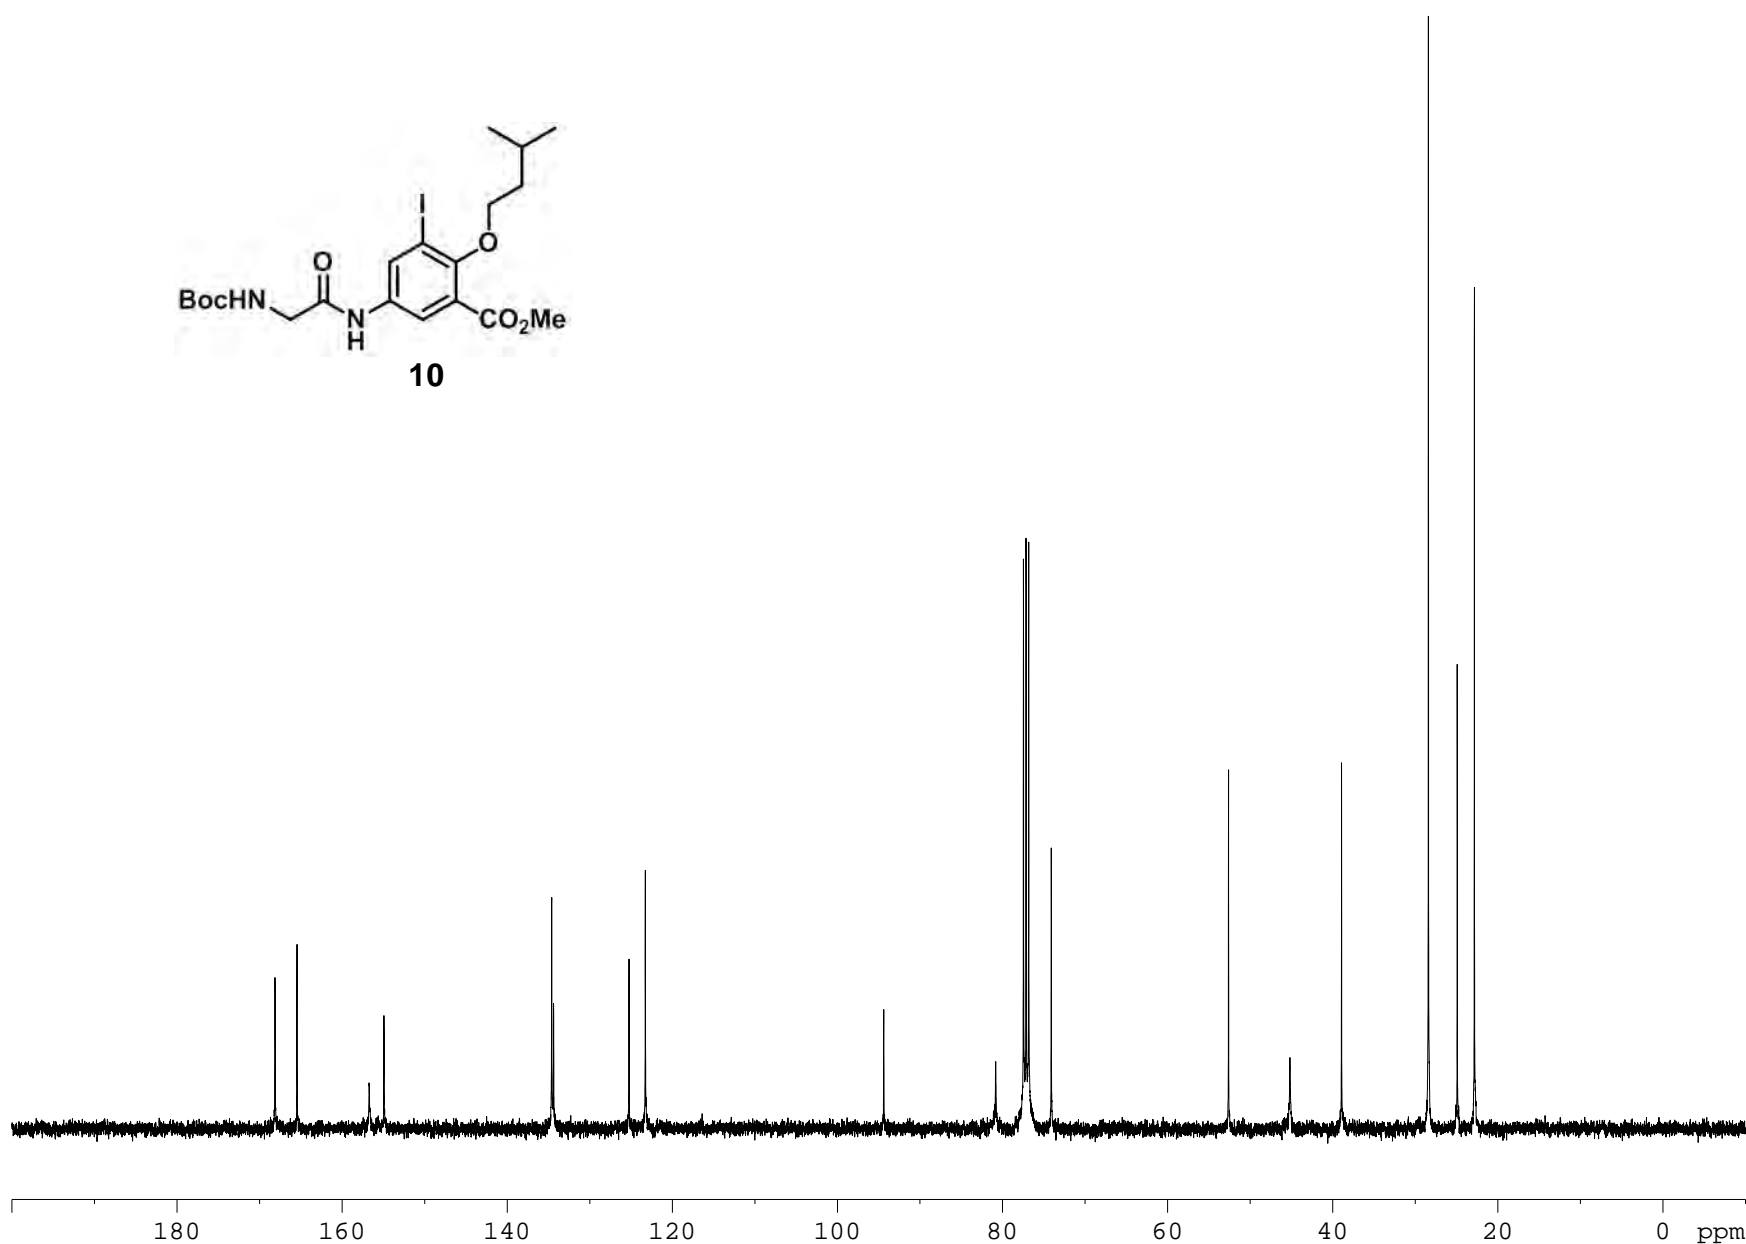

```

NAME      Sun-01052014-(I)-BOC-CO2Me
EXPNO     2
PROCNO    1
Date_     20121017
Time      22.08
INSTRUM   spect
PROBHD    5 mm PABBI 1H/
PULPROG   zgpg30
TD         65536
SOLVENT   CDCl3
NS         909
DS         4
SWH        24038.461 Hz
FIDRES     0.356798 Hz
AQ         1.3631988 sec
RG         203
DW         20.800 usec
DE         6.50 usec
TE         294.4 K
D1         2.0000000 sec
D11        0.0300000 sec
TDO        1

```

```

===== CHANNEL f1 =====
NUC1       13C
P1         14.50 usec
PL1        -4.00 dB
PL1W       90.22689819 W
SFO1       100.6228298 MHz

```

```

===== CHANNEL f2 =====
CPDPRG2   waltz16
NUC2       1H
PCPD2     90.00 usec
PL2        -2.00 dB
PL12       20.06 dB
PL13       22.00 dB
PL2W       13.17734718 W
PL12W      0.0200368 W
PL13W      0.05245997 W
SFO2       400.1316005 MHz
SI         32768
SF         100.6127603 MHz
MWM        BM
SSB         0
LB          1.00 Hz
GB          0
PC          1.40

```

hfc1502 #6-8 RT: 0.53-0.69 AV: 3 SM: 5G NL: 1.84E6  
T: + p ESI Full ms [ 99.50-1500.50]

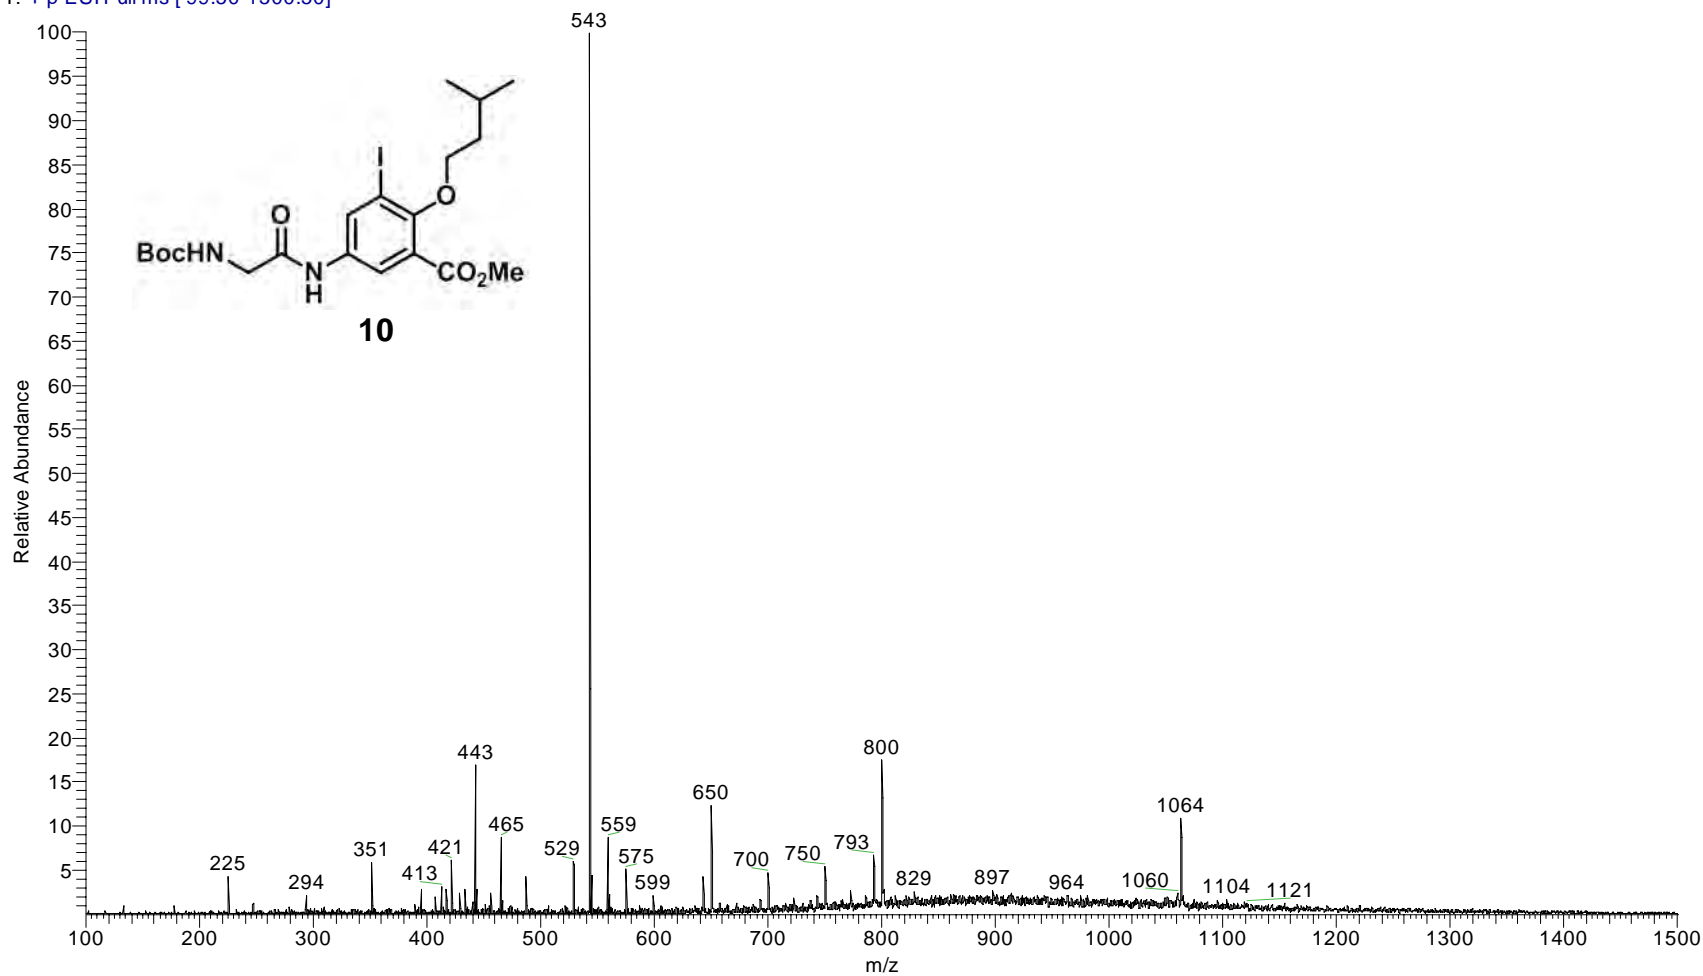

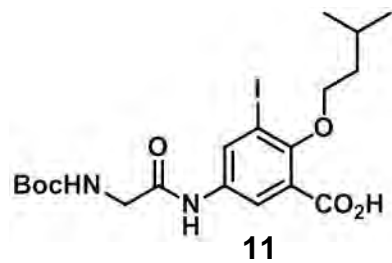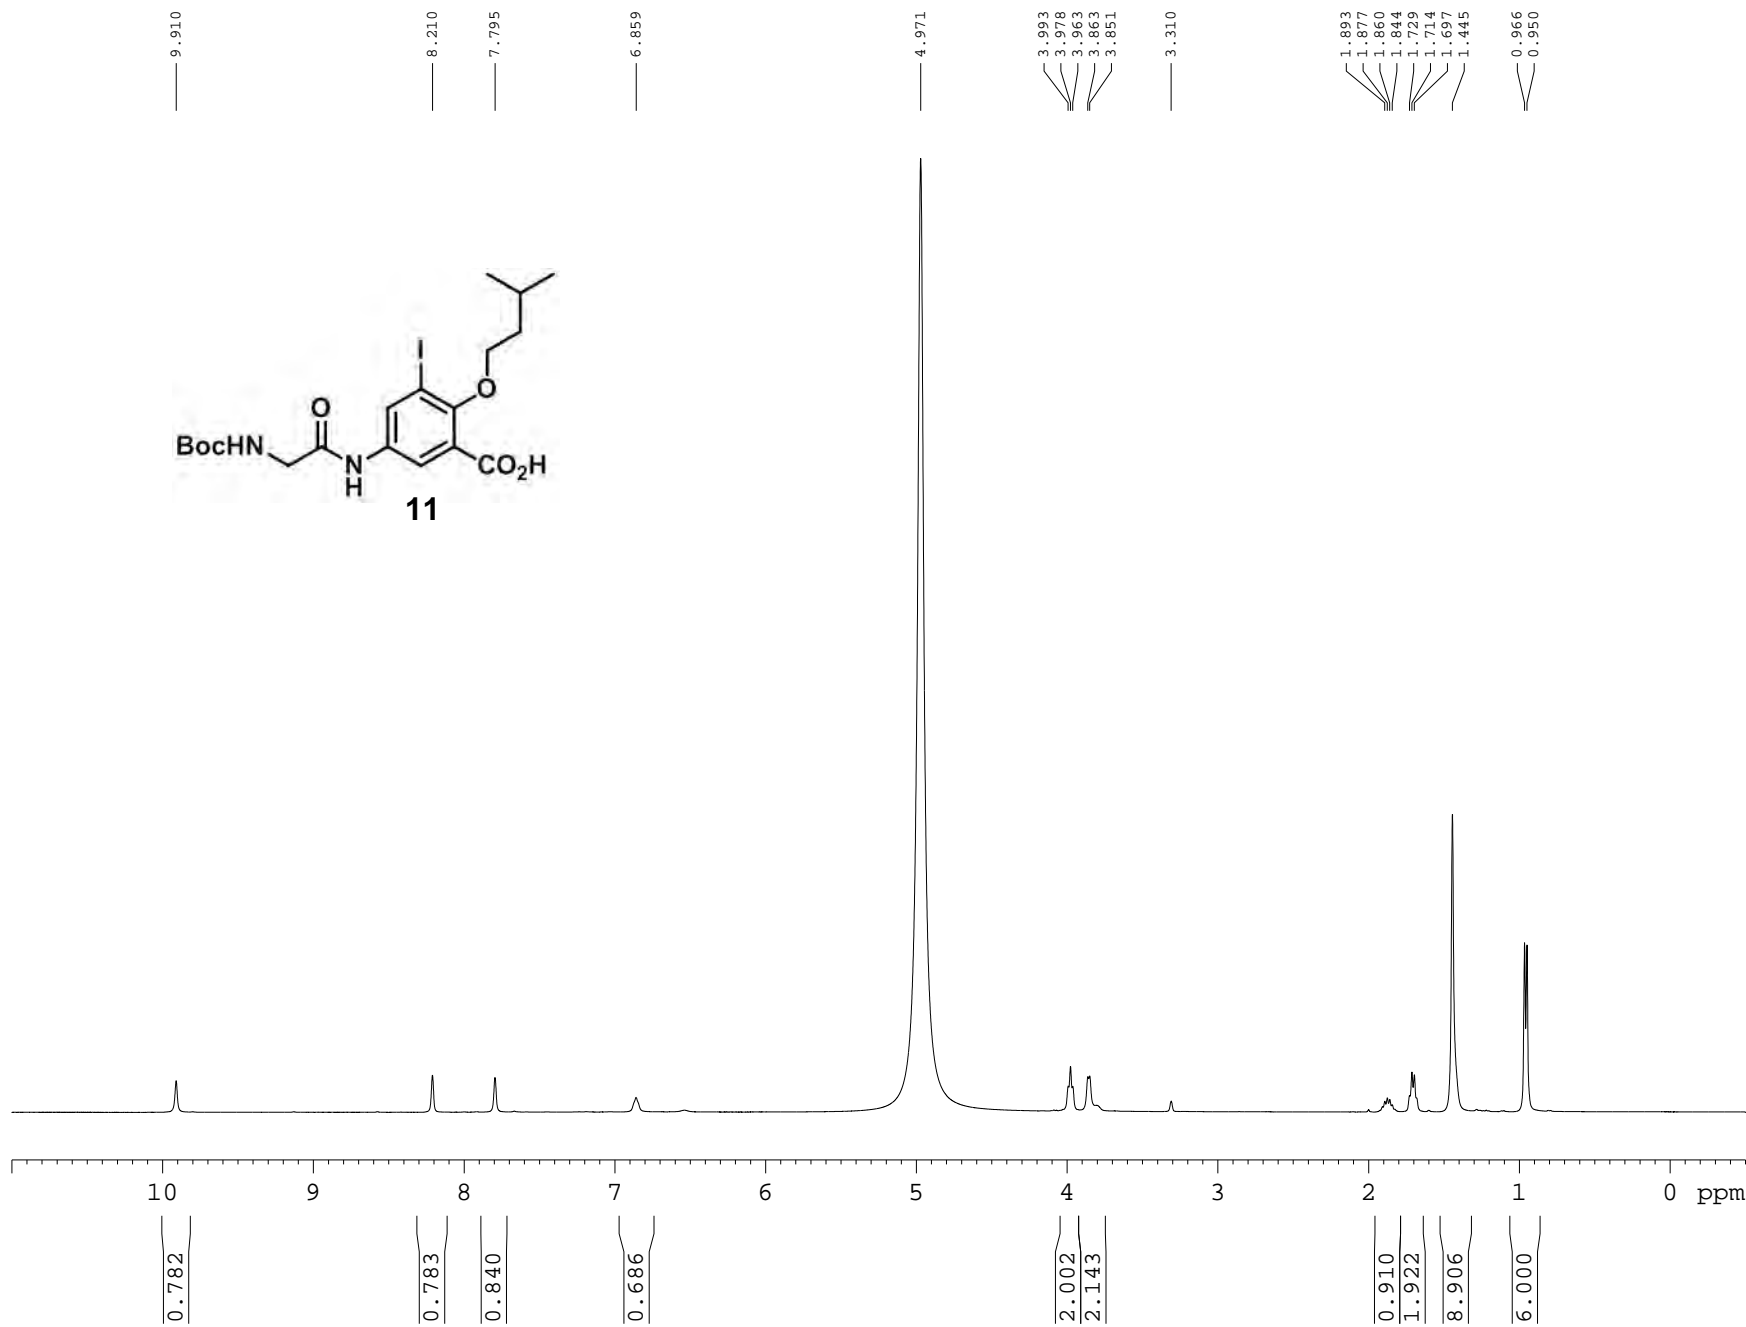

```

NAME Sun-10102013-(1)-BOC-COOH
EXPNO 1
PROCNO 1
Date_ 20131010
Time 15.01
INSTRUM spect
PROBHD 5 mm PABBO BB-
PULPROG zg30
TD 32768
SOLVENT MeOD
NS 16
DS 2
SWH 8223.685 Hz
FIDRES 0.250967 Hz
AQ 1.9923444 sec
RG 8
DN 60.800 usec
DE 6.50 usec
TE 295.9 K
D1 1.0000000 sec
TDO 1

===== CHANNEL f1 =====
NUC1 1H
P1 14.00 usec
PL1 -1.00 dB
PL1W 13.56617069 W
SFO1 400.1924713 MHz
SI 32768
SF 400.1900132 MHz
WDW EM
SSB 0
LB 0.30 Hz
GB 0
PC 1.00
  
```

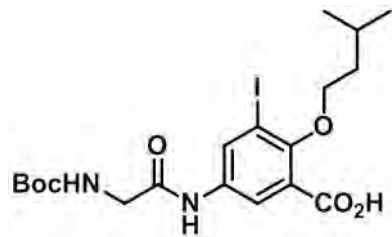

11

170.569  
170.198  
158.376  
154.620  
136.161  
134.031  
129.962  
123.287

93.902  
80.600  
74.466

49.639  
49.427  
49.213  
49.000  
48.787  
48.575  
48.362  
44.984  
39.939

28.572  
25.786  
23.044

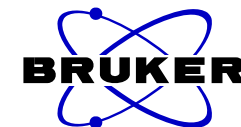

```

NAME Sun-10102013-(1)-BOC-COOH
EXPNO 2
PROCNO 1
Date_ 20131010
Time 14.49
INSTRUM spect
PROBHD 5 mm PABBO BB-
PULPROG zgpg30
TD 65536
SOLVENT MeOD
NS 217
DS 4
SWH 24038.461 Hz
FIDRES 0.366798 Hz
AQ 1.3631968 sec
RG 1820
DN 20.800 usec
DE 6.50 usec
TE 296.0 K
D1 2.0000000 sec
D11 0.0300000 sec
TDO

```

```

***** CHANNEL f1 *****
NUC1 13c
P1 9.90 usec
PL1 -2.00 dB
PL1W 55.33689499 W
SF01 100.6379183 MHz

```

```

***** CHANNEL f2 *****
CPDPRG2 waltz16
NUC2 1H
PCPD2 90.00 usec
PL2 -1.00 dB
PL12 15.16 dB
PL13 18.62 dB
PL2W 13.56617069 W
PL12W 0.32844096 W
PL13W 0.14806664 W
SF02 400.1916008 MHz
SI 32768
SF 100.6277392 MHz
WDW EM
SSB 0
LB 1.00 Hz
GB 0
PC 1.40

```

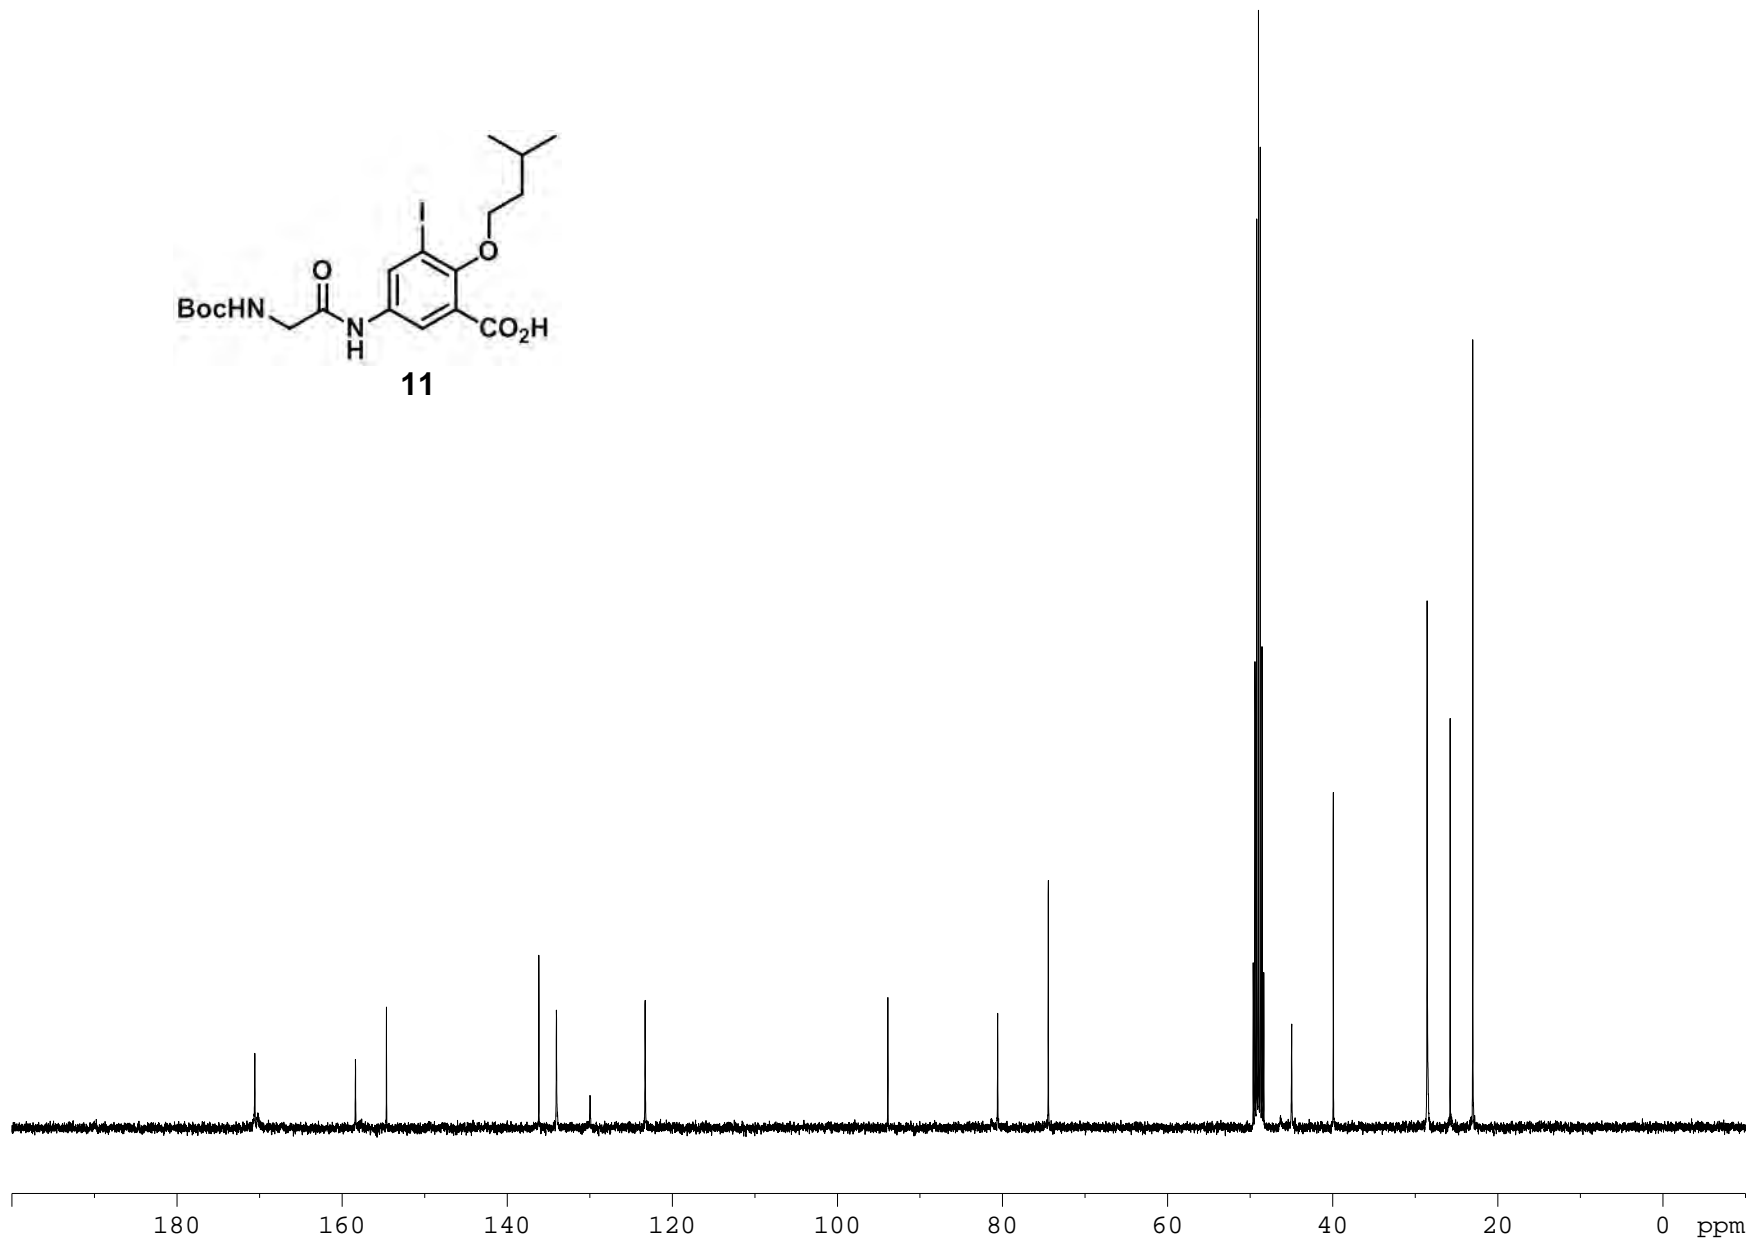

hfc2021 #1-2 RT: 0.15-0.23 AV: 2 SM: 5G NL: 7.96E5  
T: + p ESI Full ms [ 99.50-800.50]

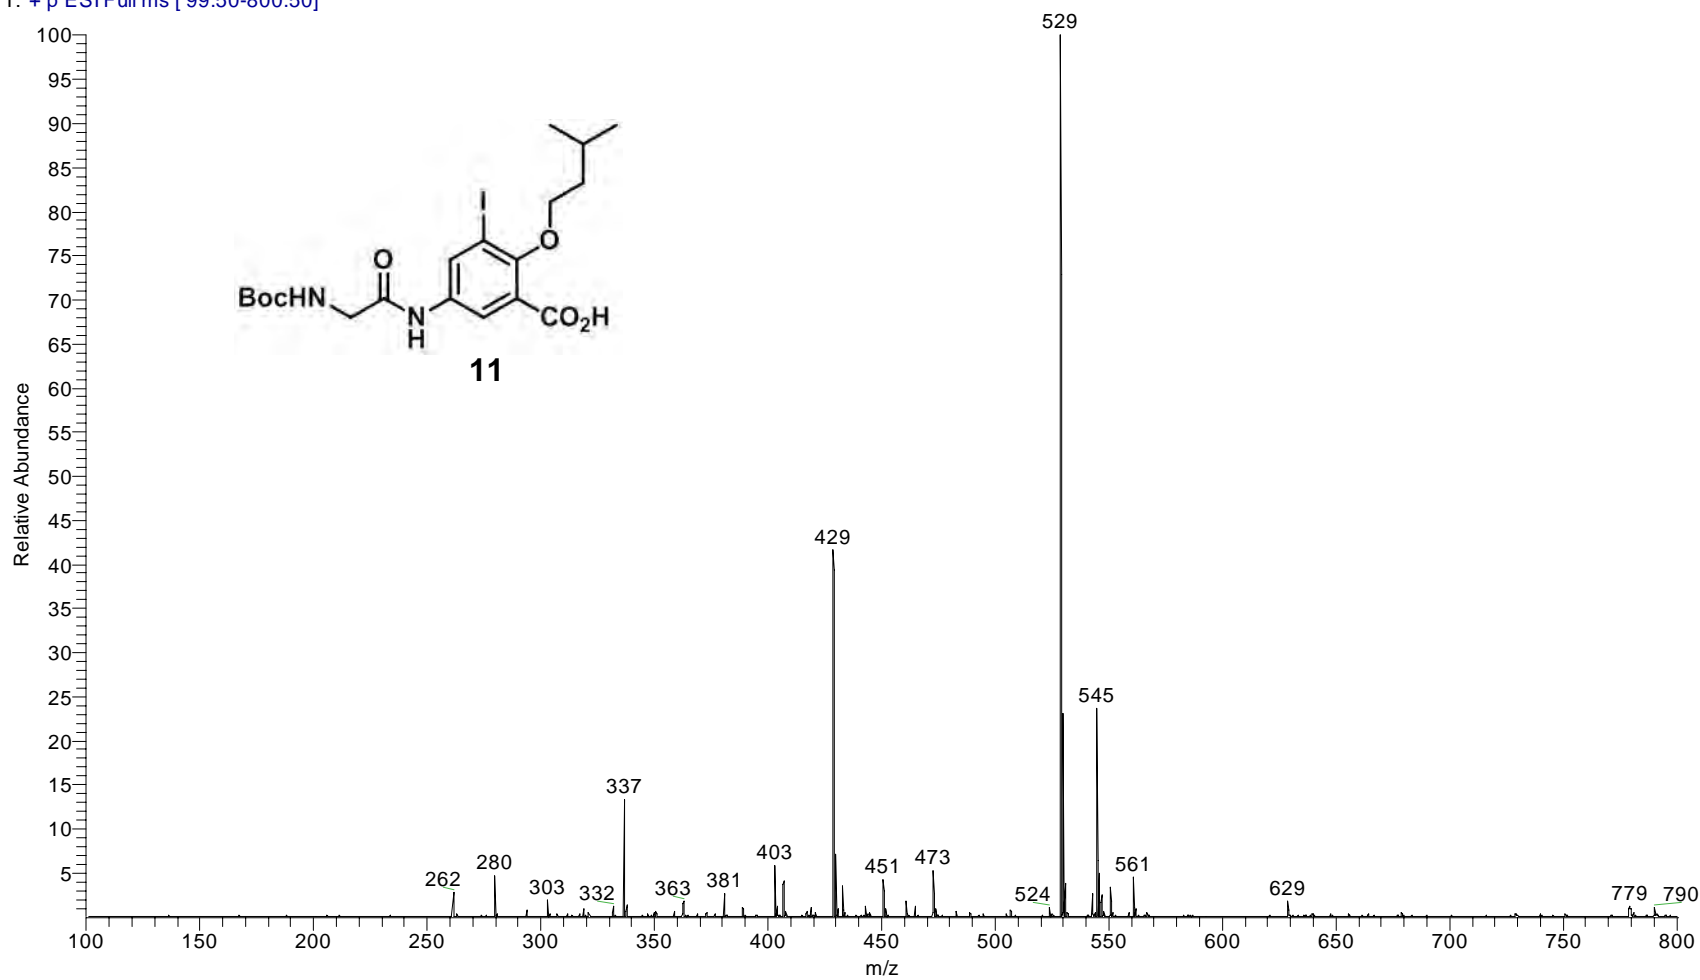



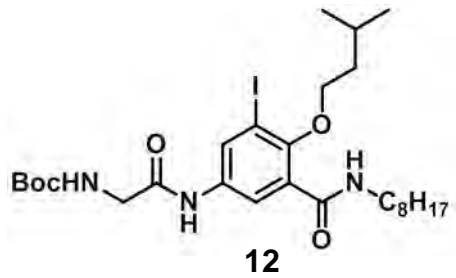

8.583  
8.576  
8.472

7.762  
7.755  
7.738  
7.725

7.260

5.249

3.949  
3.934  
3.912  
3.895  
3.877  
3.470  
3.453  
3.437  
3.420

1.862  
1.846  
1.829  
1.813  
1.797  
1.789  
1.772  
1.755  
1.738  
1.632  
1.616  
1.598  
1.584  
1.475  
1.375  
1.369  
1.355  
1.339  
1.316  
1.272  
0.989  
0.973  
0.895  
0.879  
0.861

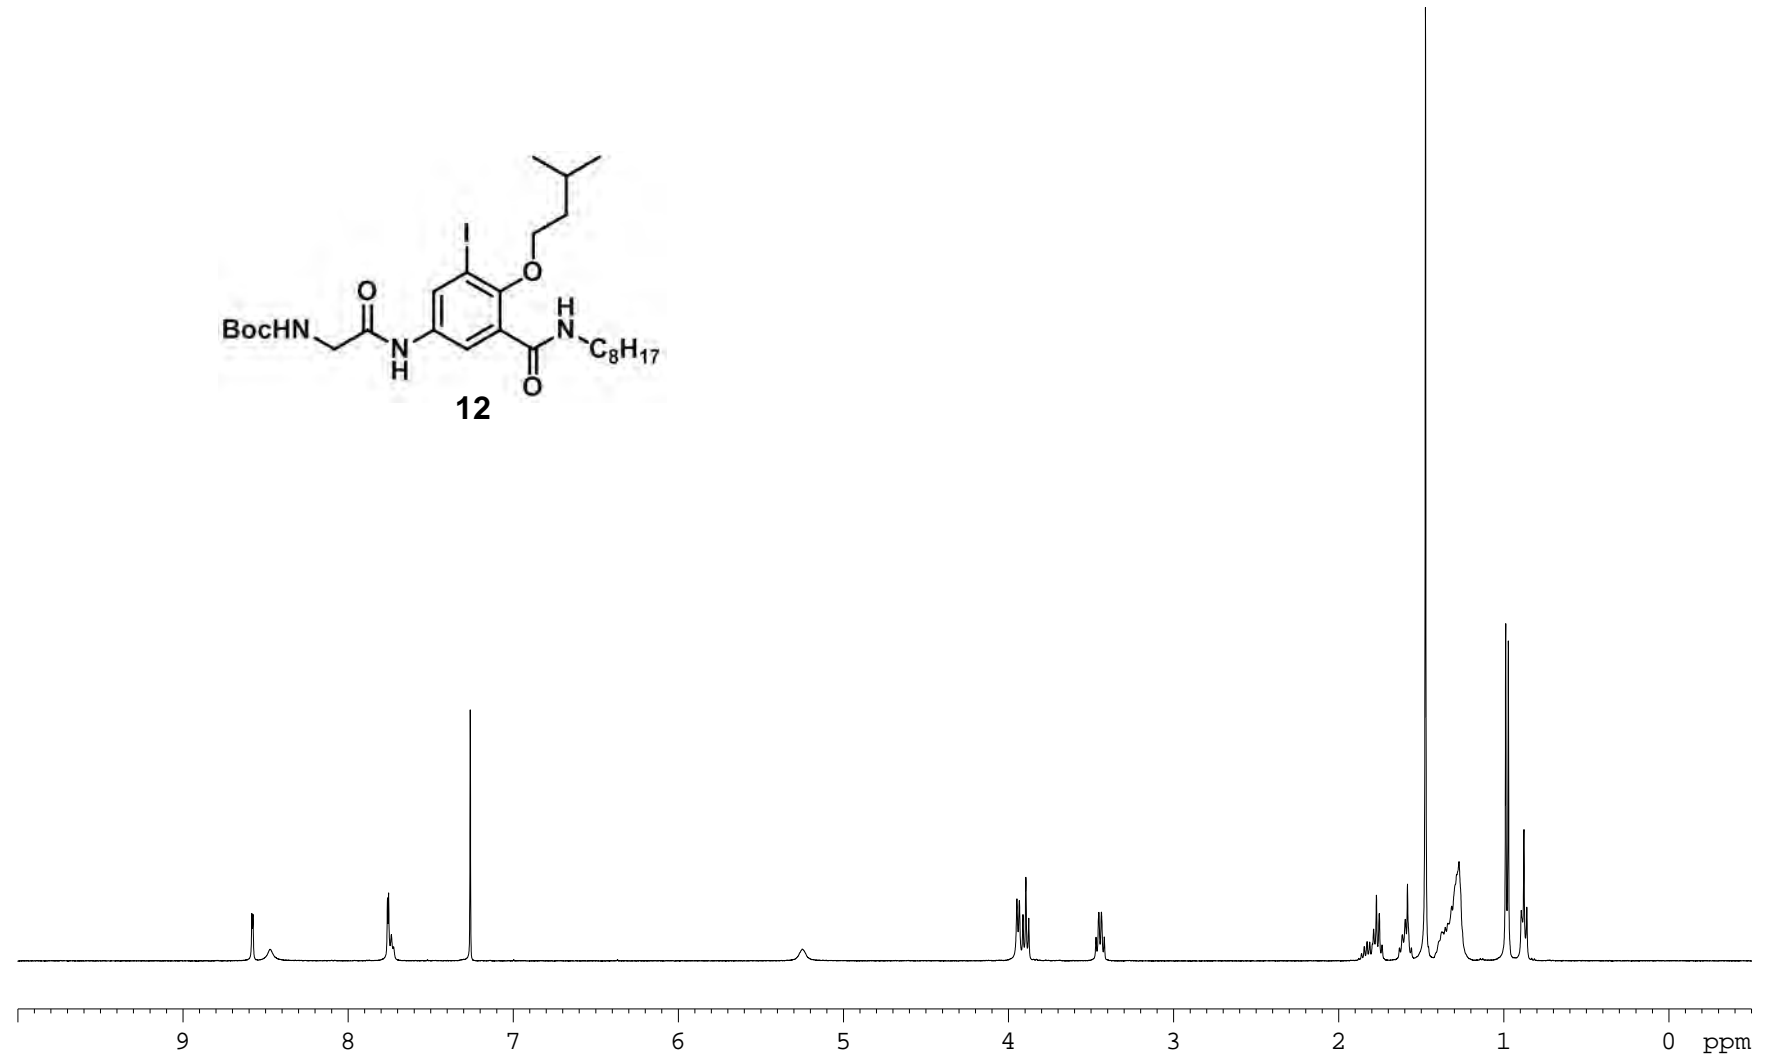

0.927  
0.824

1.904

0.922

1.892  
2.006

1.997

3.059  
2.671  
8.887  
10.486  
6.044  
3.000



```

NAME      Sun-09102012-(I)-BOC-C8
EXPNO     1
PROCNO    1
Date_     20130109
Time      15.56
INSTRUM   spect
PROBHD    5 mm PADUL 13C
PULPROG   zg30
TD        32768
SOLVENT   CDCl3
NS        16
DS        2
SWH       8223.685 Hz
FIDRES    0.250967 Hz
AQ        1.9923444 sec
RG        203
DW        60.800 usec
DE        6.50 usec
TE        295.3 K
D1        1.00000000 sec
TD0       1

===== CHANNEL f1 =====
NUC1      1H
P1        15.69 usec
PL1       0.00 dB
PL1W      8.31434441 W
SF01      400.1324710 MHz
SI        32768
SF        400.1300091 MHz
WDW       EM
SSB       0
LB        0.30 Hz
GB        0
PC        1.00

```

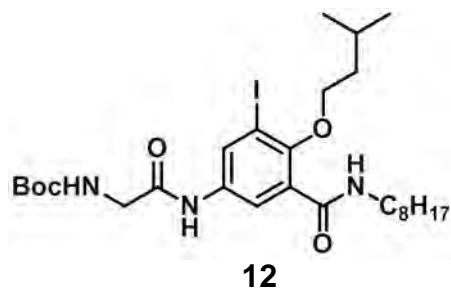

168.333  
164.446  
156.377  
152.604  
135.669  
133.922  
127.575  
122.896

93.230

80.346  
77.477  
77.160  
76.842  
74.569

45.033  
40.304  
39.020  
31.909  
29.605  
29.437  
29.303  
28.433  
27.249  
25.114  
22.875  
22.744  
14.198

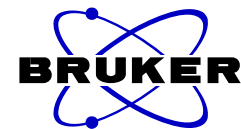

```

NAME      Sun-09102012-(I)-BOC-C8
EXPNO     2
PROCNO    1
Date_     20120921
Time      10.04
INSTRUM   spect
PROBHD    5 mm PABBI 1H/
PULPROG   zgpg30
TD         65536
SOLVENT   CDCl3
NS         3329
DS         4
SWH        24038.461 Hz
FIDRES     0.366798 Hz
AQ         1.3631988 sec
RG         203
DW         20.800 usec
DE         6.50 usec
TE         294.8 K
D1         2.0000000 sec
D11        0.0300000 sec
TD0        1
  
```

```

***** CHANNEL f1 *****
NUC1      13C
P1         14.50 usec
PL1        -4.00 dB
PL1W       90.2269819 W
SFO1      100.628298 MHz
  
```

```

***** CHANNEL f2 *****
CPDPRG2   waltz16
NUC2       1H
PCPD2     90.00 usec
PL2        -2.00 dB
PL12       20.06 dB
PL13       22.00 dB
PL2W       13.17734718 W
PL12W      0.08200268 W
PL13W      0.05245997 W
SFO2      400.1316005 MHz
SI         32768
SF         100.6127596 MHz
WDW        EM
SSB         0
LB         1.00 Hz
GB         0
PC         1.40
  
```

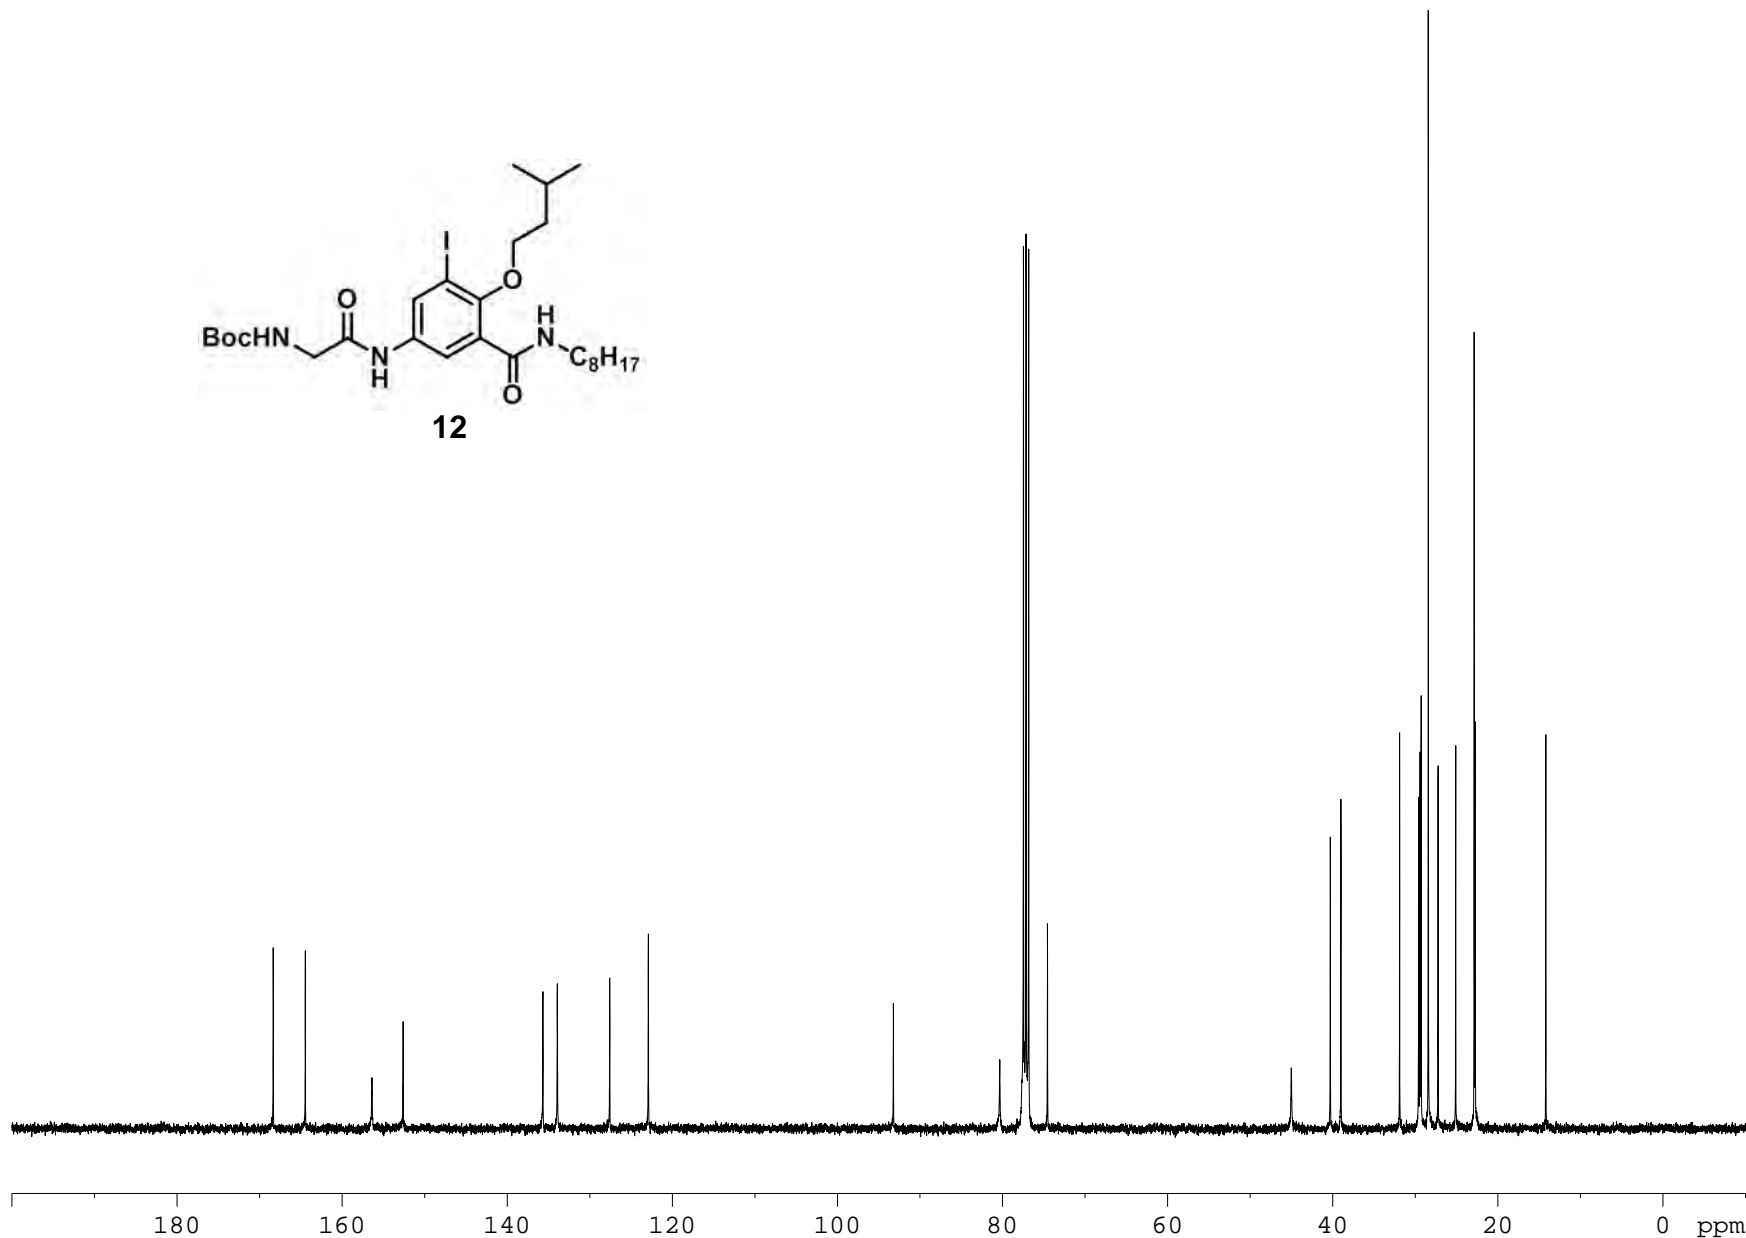

hfc1506\_120828120353 #1-3 RT: 0.12-0.29 AV: 3 SM: 5G NL: 1.43E6  
T: + p ESI Full ms [ 99.50-1500.50]

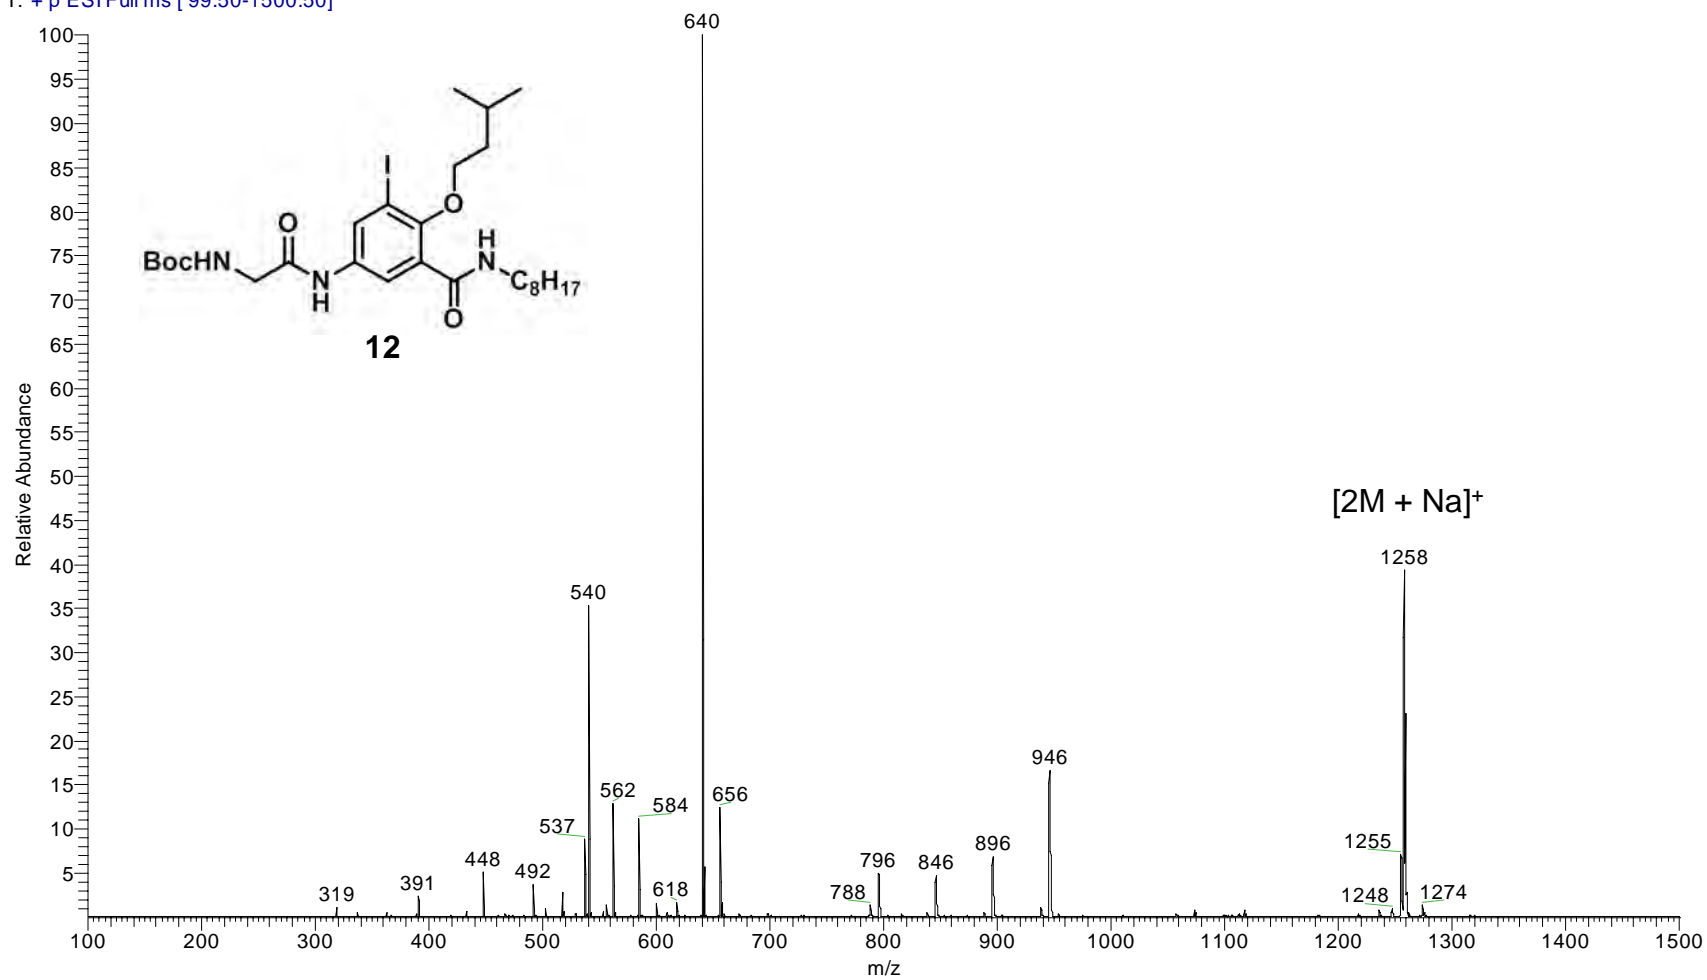

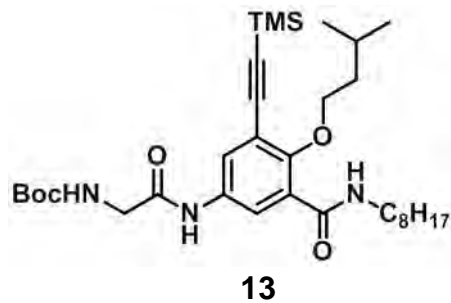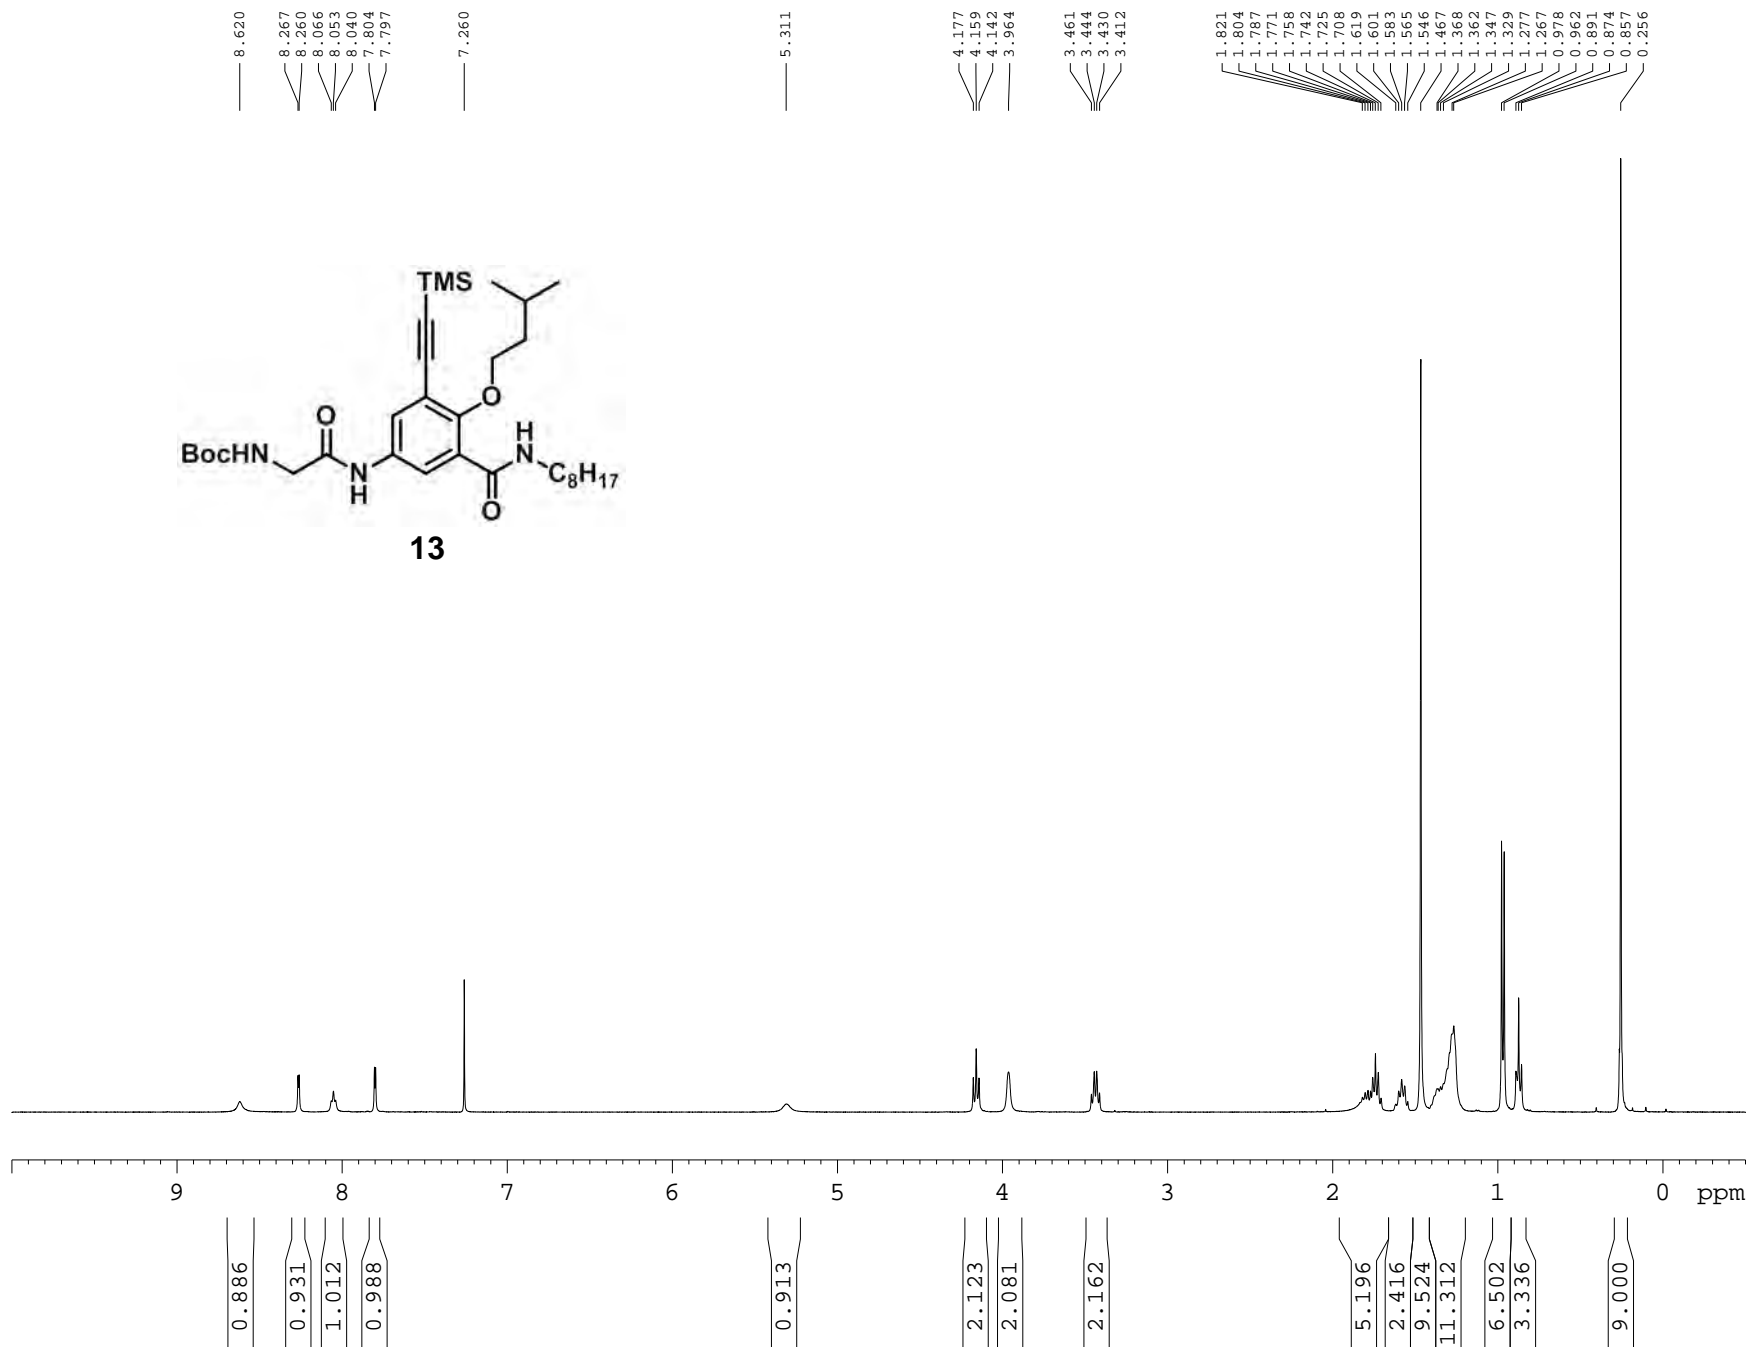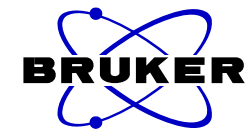

```

NAME      Sun-10072013-(TMS)-BOC-C8
EXPNO     1
PROCNO    1
Date_     20130710
Time      14.29
INSTRUM   spect
PROBHD    5 mm PADUL 13C
PULPROG   zg30
TD         32768
SOLVENT   CDCl3
NS         16
DS         2
SWH        8223.685 Hz
FIDRES     0.250967 Hz
AQ         1.9923444 sec
RG         203
DN         60.800 usec
DE         6.50 usec
TE         294.5 K
D1         1.0000000 sec
TDO        1

===== CHANNEL f1 =====
NUC1       1H
P1         15.69 usec
PL1        0.00 dB
PL1W       8.31434441 W
SFO1       400.1324710 MHz
SI         32768
SF         400.1300091 MHz
WDW        EM
SSB        0
LB         0.30 Hz
GB         0
PC         1.00

```

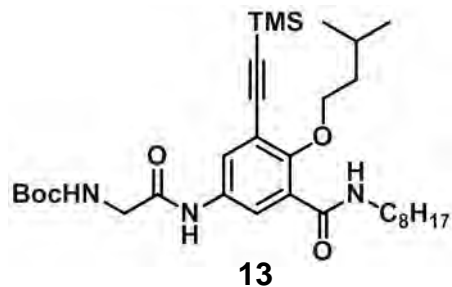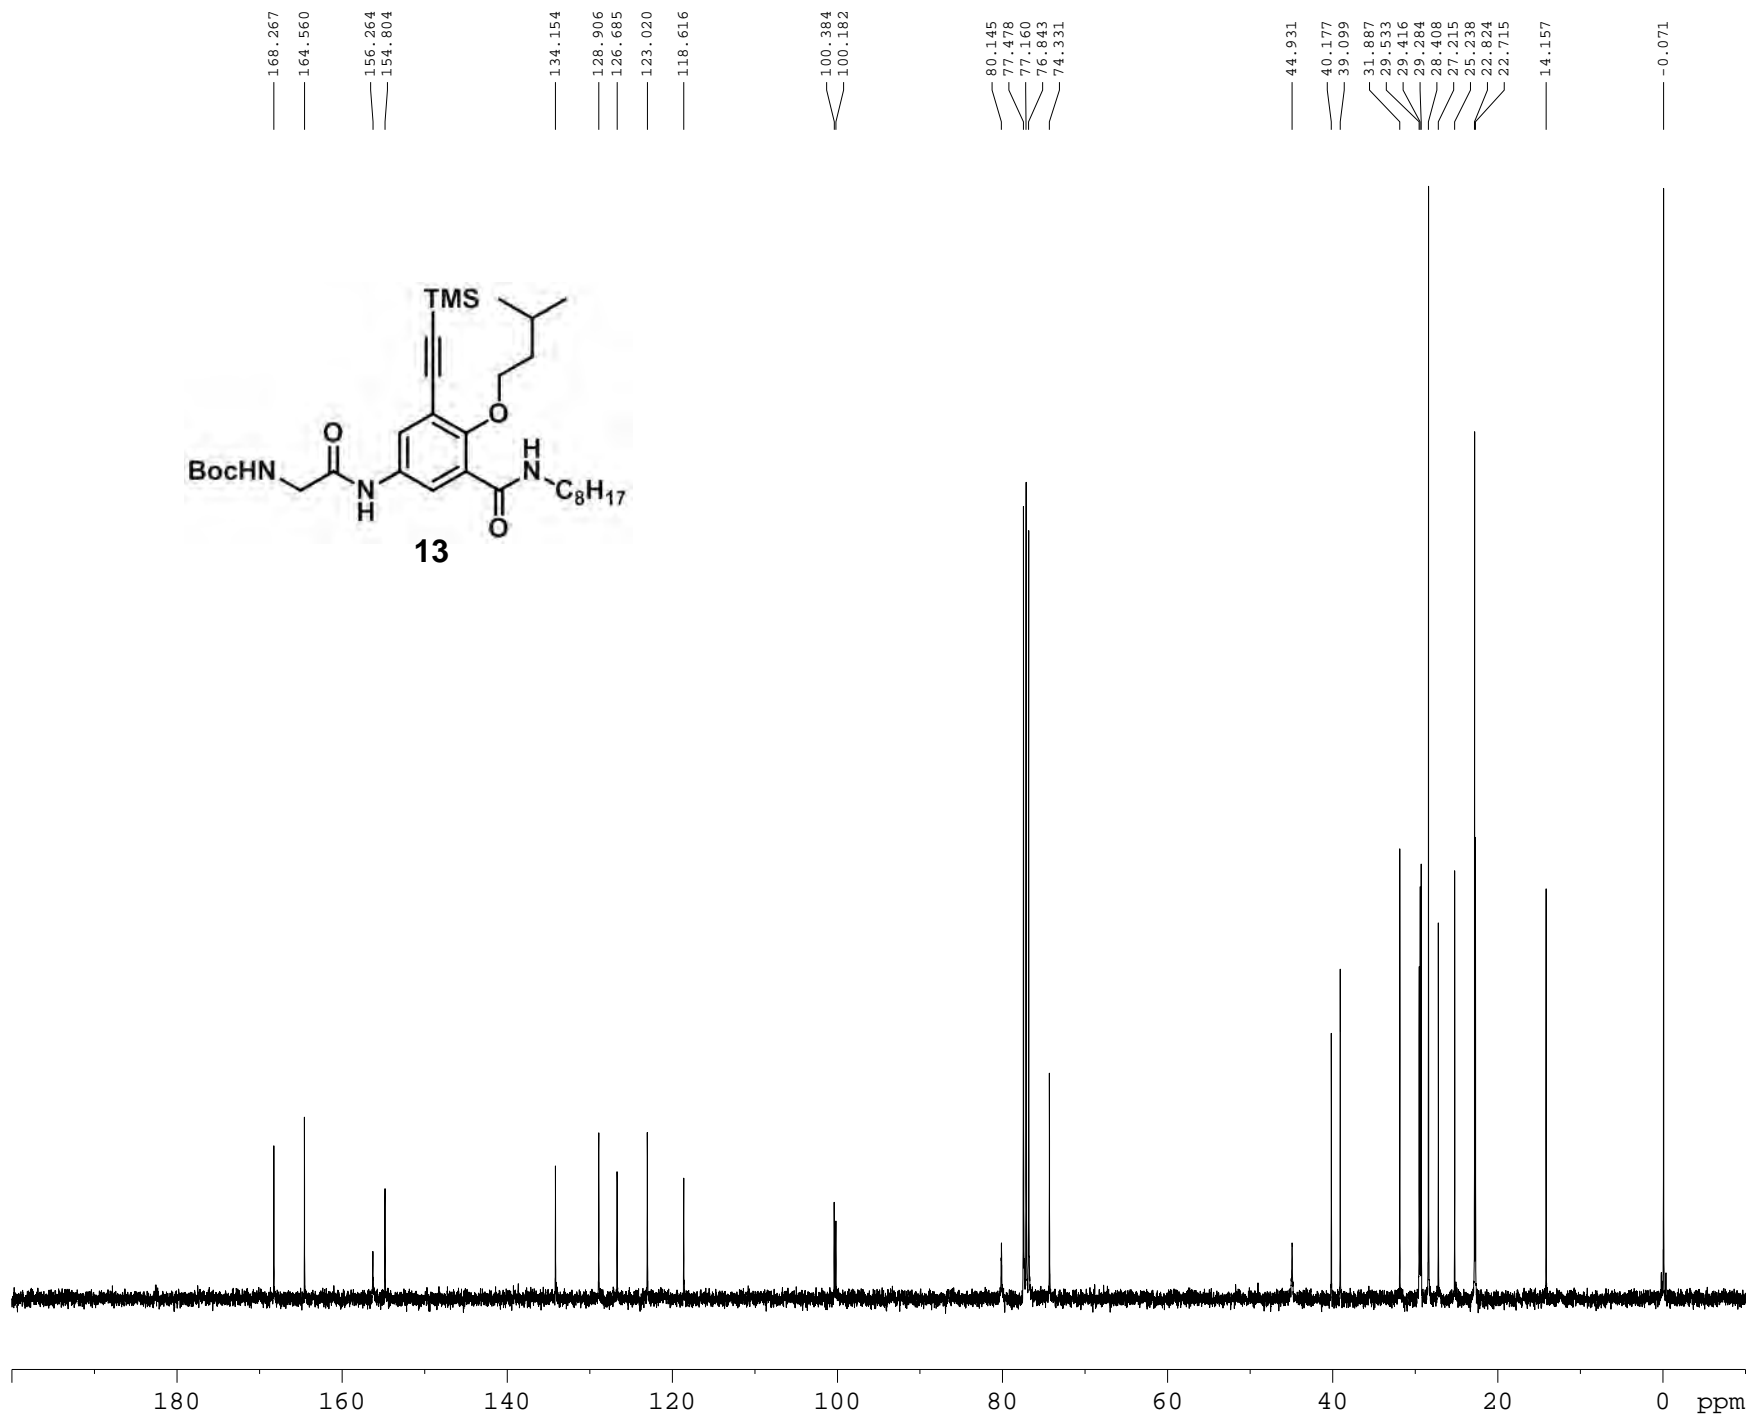

168.267  
 164.560  
 156.264  
 154.804  
 134.154  
 128.906  
 126.685  
 123.020  
 118.616  
 100.384  
 100.182  
 80.145  
 77.478  
 77.160  
 76.843  
 74.331  
 44.931  
 40.177  
 39.099  
 31.887  
 29.533  
 29.416  
 29.284  
 28.408  
 27.215  
 25.238  
 22.824  
 22.715  
 14.157  
 -0.071



```

NAME      Sun-10072013-(TMS)-BOC-C8
EXPNO     2
PROCNO    1
Date_     20130711
Time      11.57
INSTRUM   spect
PROBHD    5 mm PADUL 13C
PULPROG   zgpg30
TD         65536
SOLVENT   CDCl3
NS         170
DS         4
SWH        24038.461 Hz
FIDRES     0.366798 Hz
AQ          1.3631968 sec
RG          203
DW          20.800 usec
DE          6.50 usec
TE          294.7 K
D1          2.0000000 sec
D11         0.0300000 sec
TD0         1

***** CHANNEL f1 *****
NUC1       13c
P1          9.68 usec
PL1         -0.60 dB
PL1W        41.24164963 W
SF01       100.6228298 MHz

***** CHANNEL f2 *****
CPDPRG2    waltz16
NUC2        1H
PCPD2       90.00 usec
PL2          0.00 dB
PL12        15.17 dB
PL13        15.92 dB
PL2W        8.33434441 W
PL12W       0.25282964 W
PL13W       0.21272963 W
SF02       400.1316005 MHz
SI          32768
SF          100.6127599 MHz
WDW         EM
SSB         0
LB          1.00 Hz
GB          0
PC          1.40
  
```

hfc1528 #2-4 RT: 0.22-0.38 AV: 3 SM: 5G NL: 8.28E5  
T: + p ESI Full ms [ 79.50-1500.50]

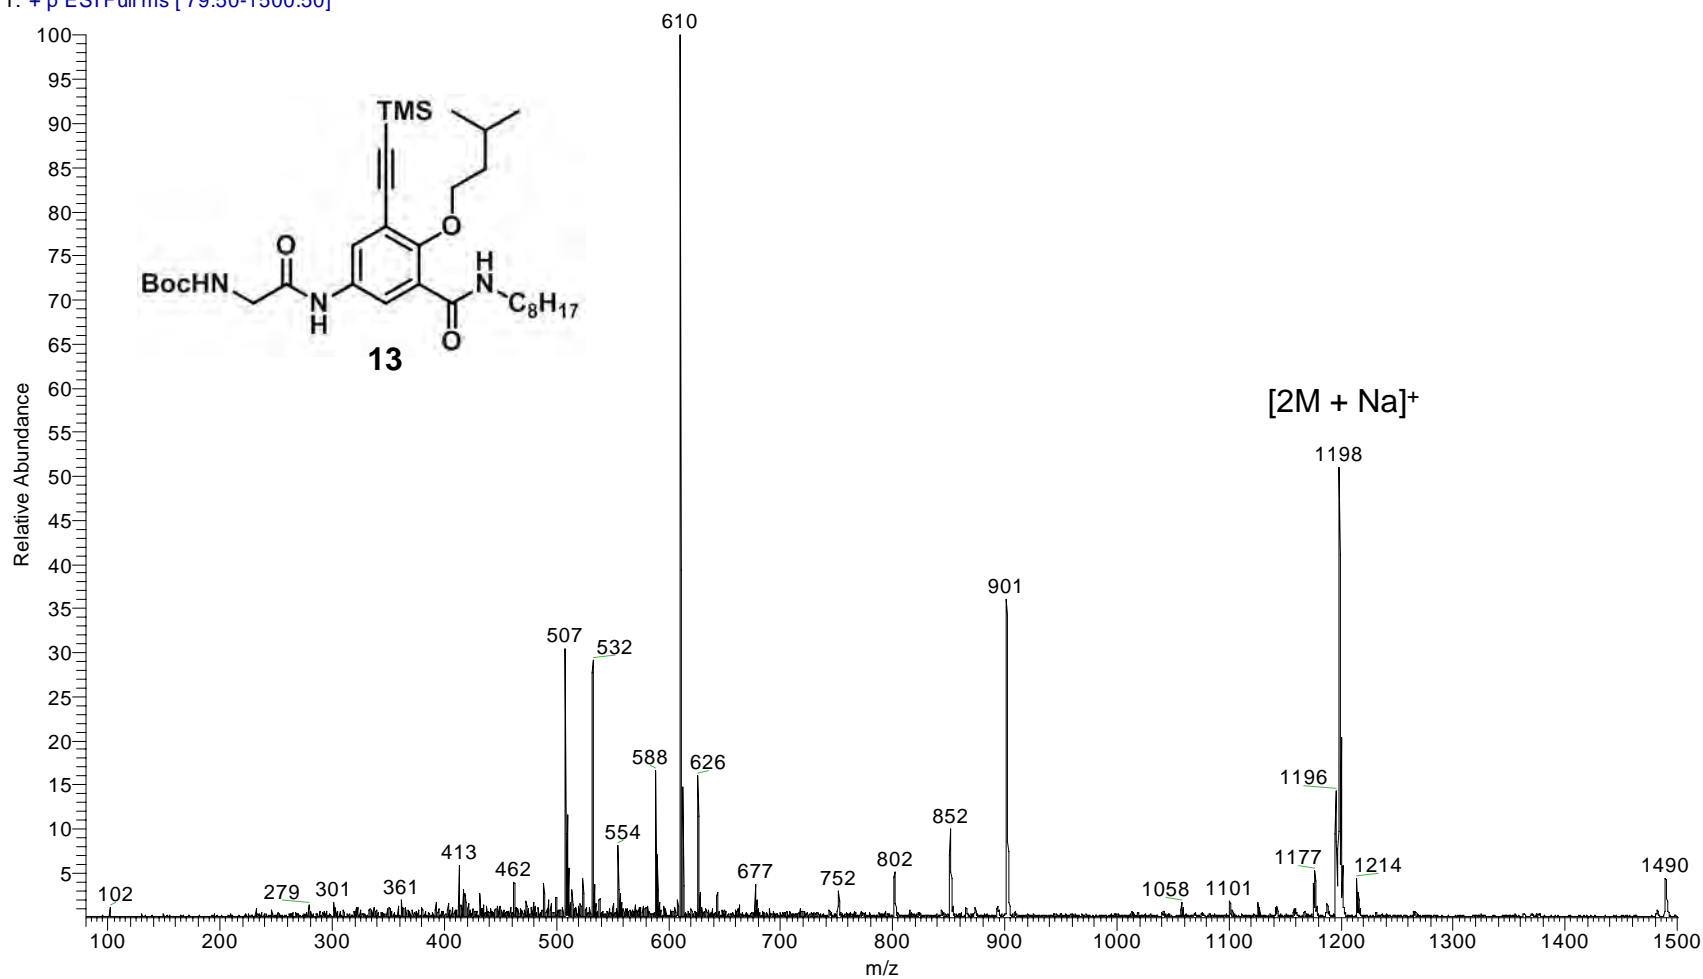

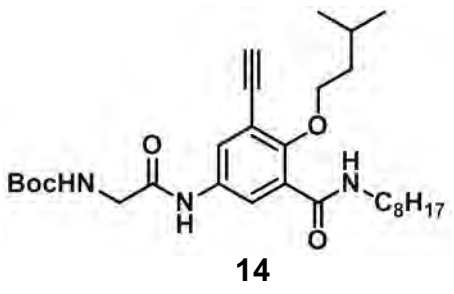

8.796  
 8.276  
 8.269  
 8.046  
 8.033  
 8.020  
 7.862  
 7.855  
 7.260

5.411

4.162  
 4.145  
 4.128  
 3.985  
 3.972  
 3.468  
 3.451  
 3.436  
 3.419  
 3.316

1.863  
 1.847  
 1.830  
 1.813  
 1.797  
 1.780  
 1.765  
 1.738  
 1.721  
 1.704  
 1.686  
 1.626  
 1.609  
 1.591  
 1.572  
 1.554  
 1.462  
 1.371  
 1.364  
 1.349  
 1.328  
 1.309  
 1.279  
 1.272  
 1.264  
 1.254  
 1.237  
 0.972  
 0.956  
 0.888  
 0.872  
 0.854

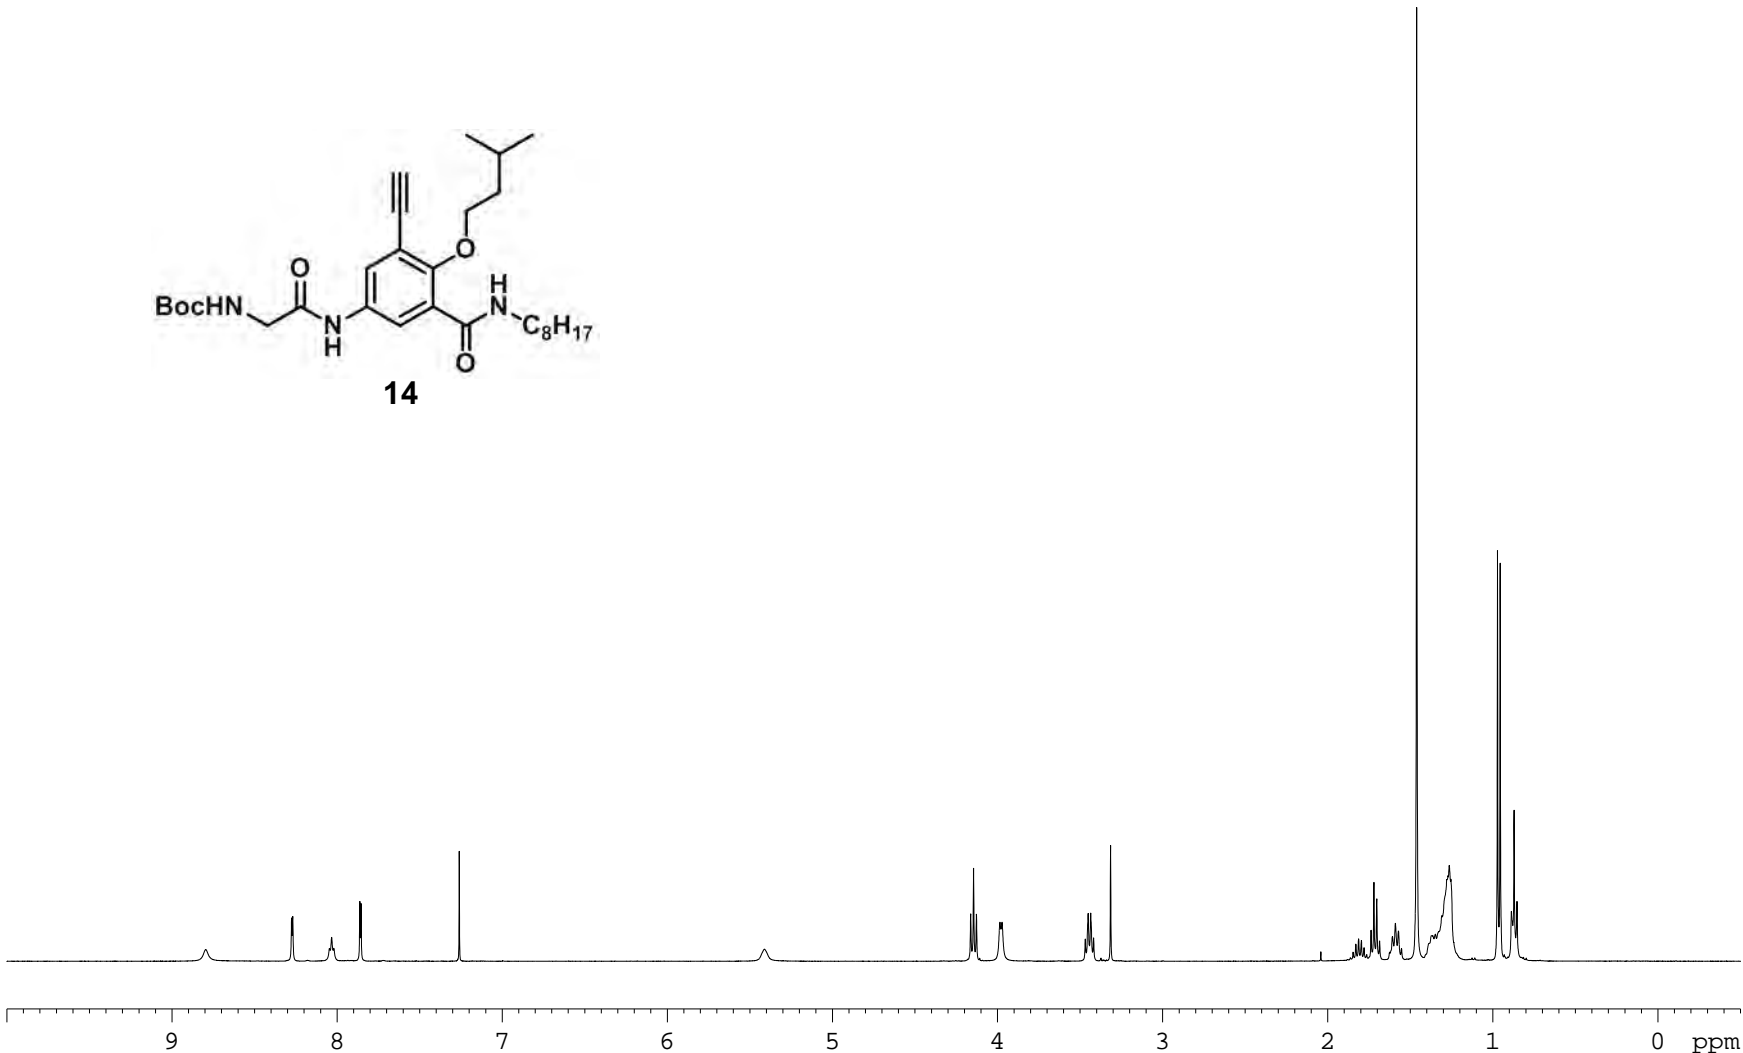

0.842  
 0.874  
 0.960  
 0.958

0.916

2.023  
 1.900

2.010  
 0.890

3.441  
 2.215  
 8.672  
 11.017  
 6.000  
 3.353

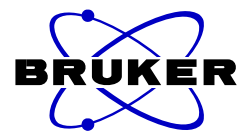

```

NAME      Sun-14052013-(CCH)-BOC-C8
EXPNO     3
PROCNO    1
Date_     20130514
Time      21.11
INSTRUM   spect
PROBHD    5 mm PADUL 13C
PULPROG   zg30
TD         32768
SOLVENT   CDCl3
NS         16
DS         2
SWH        8223.685 Hz
FIDRES     0.250967 Hz
AQ         1.9923444 sec
RG         161
DN         60.800 usec
DE         6.50 usec
TE         294.5 K
D1         1.0000000 sec
TDO        1

===== CHANNEL f1 =====
NUC1       1H
P1         15.69 usec
PL1        0.00 dB
PL1W       8.31434441 W
SFO1       400.1324710 MHz
SI         32768
SF         400.1300091 MHz
WDW        EM
SSB        0
LB         0.30 Hz
GB         0
PC         1.00
  
```

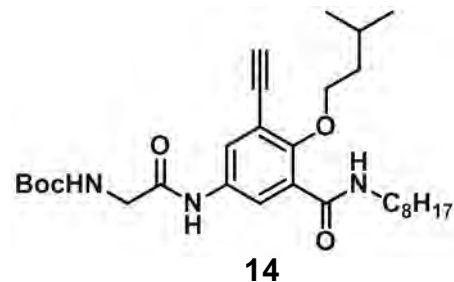

168.408  
164.468  
156.263  
154.863  
134.263  
128.769  
126.813  
123.272  
117.426

82.522  
79.843  
79.268  
77.479  
77.160  
76.841  
74.291

44.759  
40.097  
39.022  
31.801  
29.455  
29.343  
29.211  
28.317  
27.151  
24.951  
22.675  
22.627  
14.069



```

NAME      Sun-14052013-(CCH)-BOC-C8
EXPNO     1
PROCNO    1
Date_     20130514
Time      20.54
INSTRUM   spect
PROBHD    5 mm PADUL 13C
PULPROG   zgpg30
TD         65536
SOLVENT   CDCl3
NS         102
DS         4
SWH       24038.461 Hz
FIDRES    0.366798 Hz
AQ         1.3631968 sec
RG         203
DW         20.800 usec
DE         6.50 usec
TE         294.6 K
D1         2.0000000 sec
D11        0.0300000 sec
TD0        1
  
```

```

***** CHANNEL f1 *****
NUC1      13c
P1         9.68 usec
PL1        -0.60 dB
PL1W       41.24164963 W
SF01      100.6228298 MHz
  
```

```

***** CHANNEL f2 *****
CPDPRG2   waltz16
NUC2       1H
PCPD2     90.00 usec
PL2         0.00 dB
PL12       15.17 dB
PL13       15.92 dB
PL2W       8.31434441 W
PL12W      0.25282964 W
PL13W      0.21272963 W
SF02      400.1316005 MHz
SI         32768
SF         100.6127663 MHz
WDW        EM
SSB         0
LB          1.00 Hz
GB          0
PC          1.40
  
```

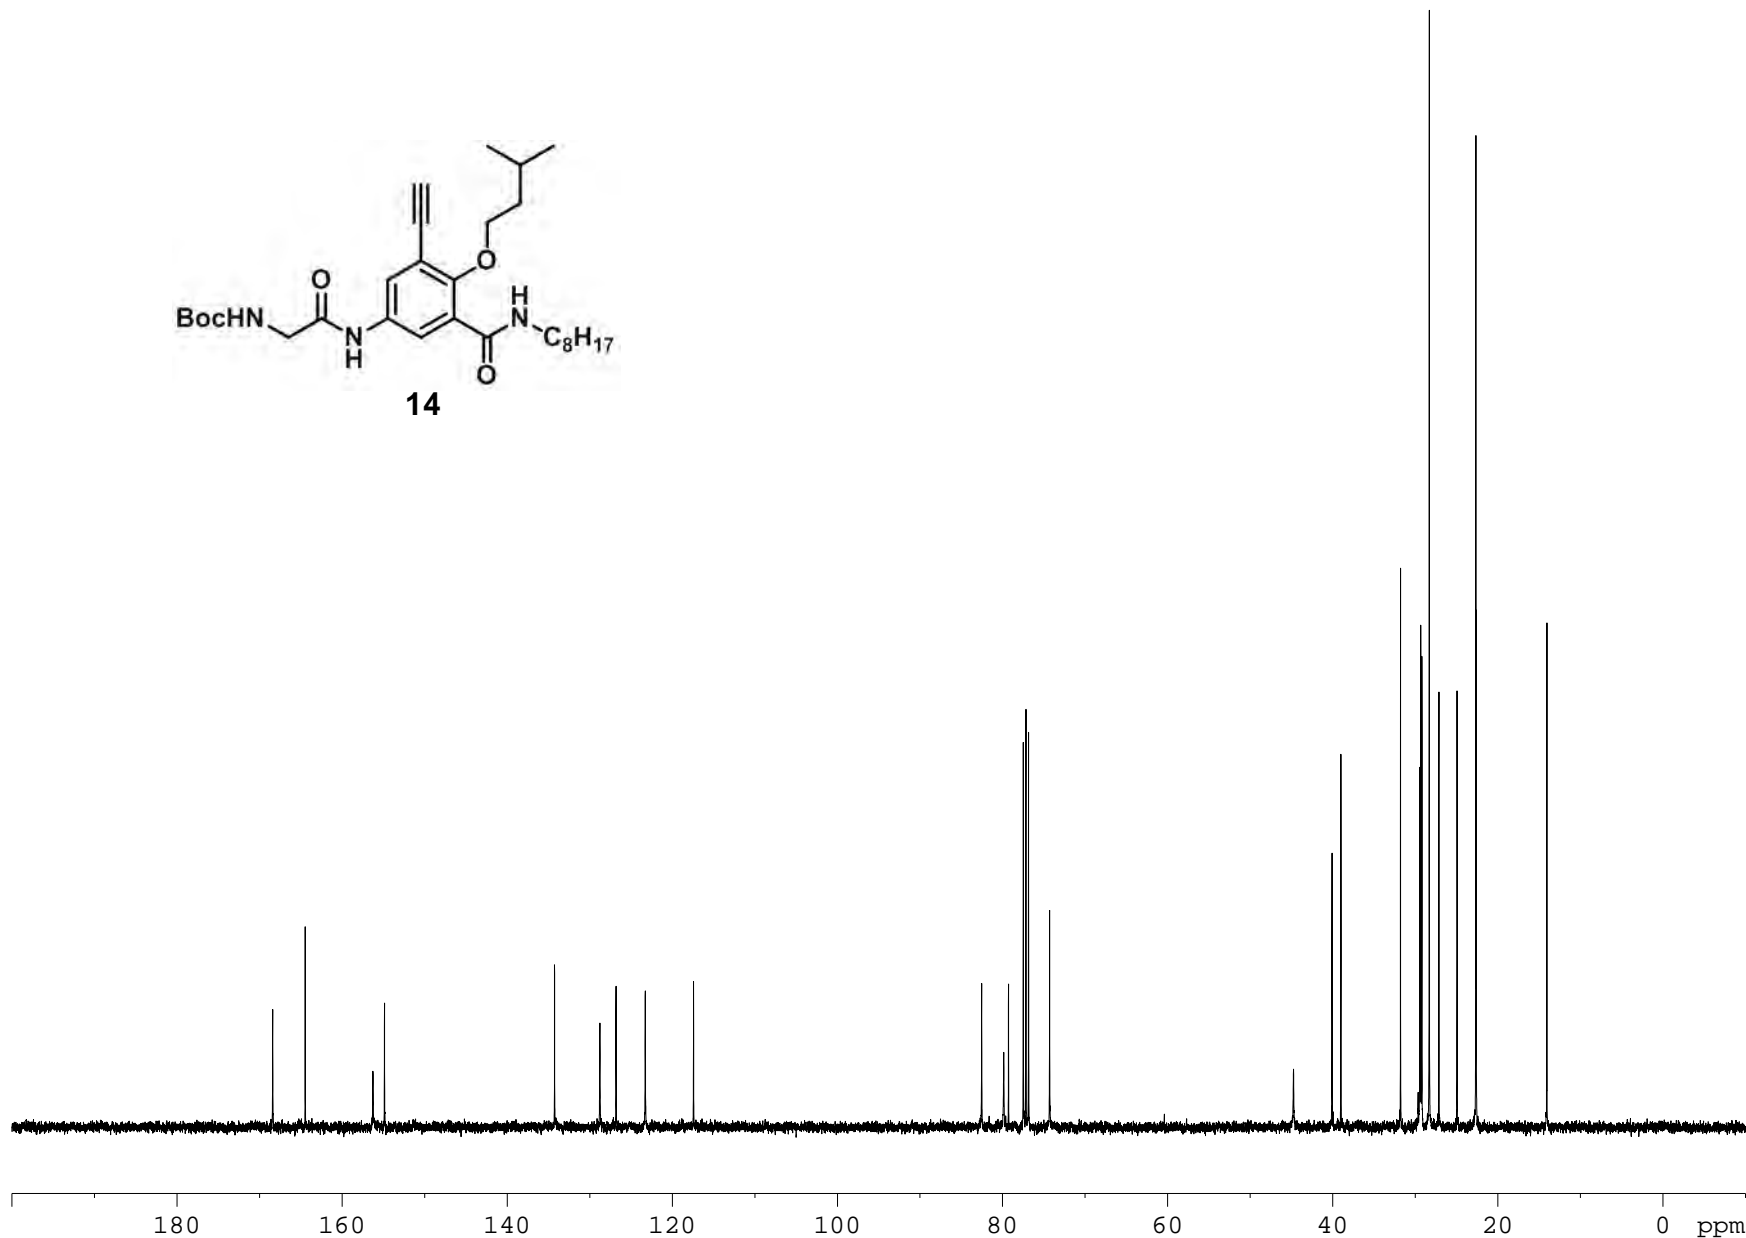



hfc1529\_121127153533 #1-2 RT: 0.14-0.22 AV: 2 SM: 5G NL: 1.62E6  
T: + p ESI Full ms [ 79.50-3000.50]

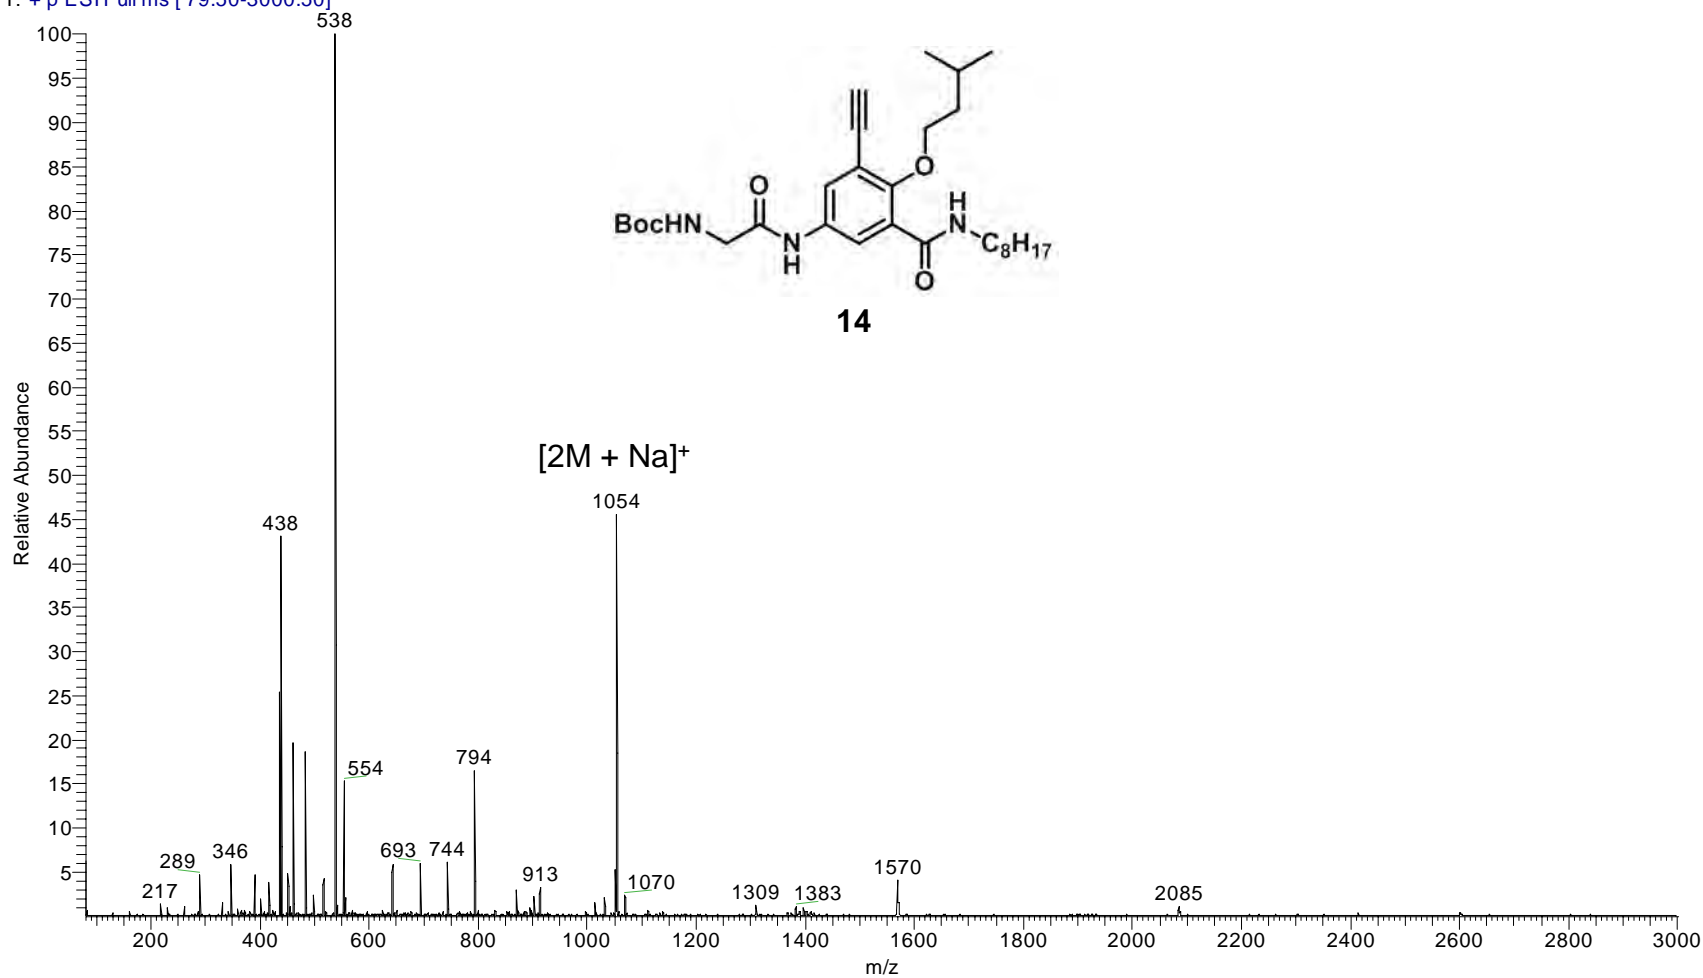

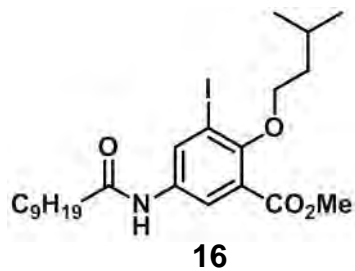

8.254  
 8.248  
 7.838  
 7.831  
 7.422  
 7.260

3.945  
 3.928  
 3.911  
 3.880

2.350  
 2.332  
 2.313  
 1.922  
 1.905  
 1.888  
 1.872  
 1.855  
 1.838  
 1.822  
 1.768  
 1.752  
 1.735  
 1.717  
 1.707  
 1.687  
 1.680  
 1.672  
 1.653  
 1.504  
 1.285  
 1.250  
 0.978  
 0.961  
 0.883  
 0.867  
 0.849

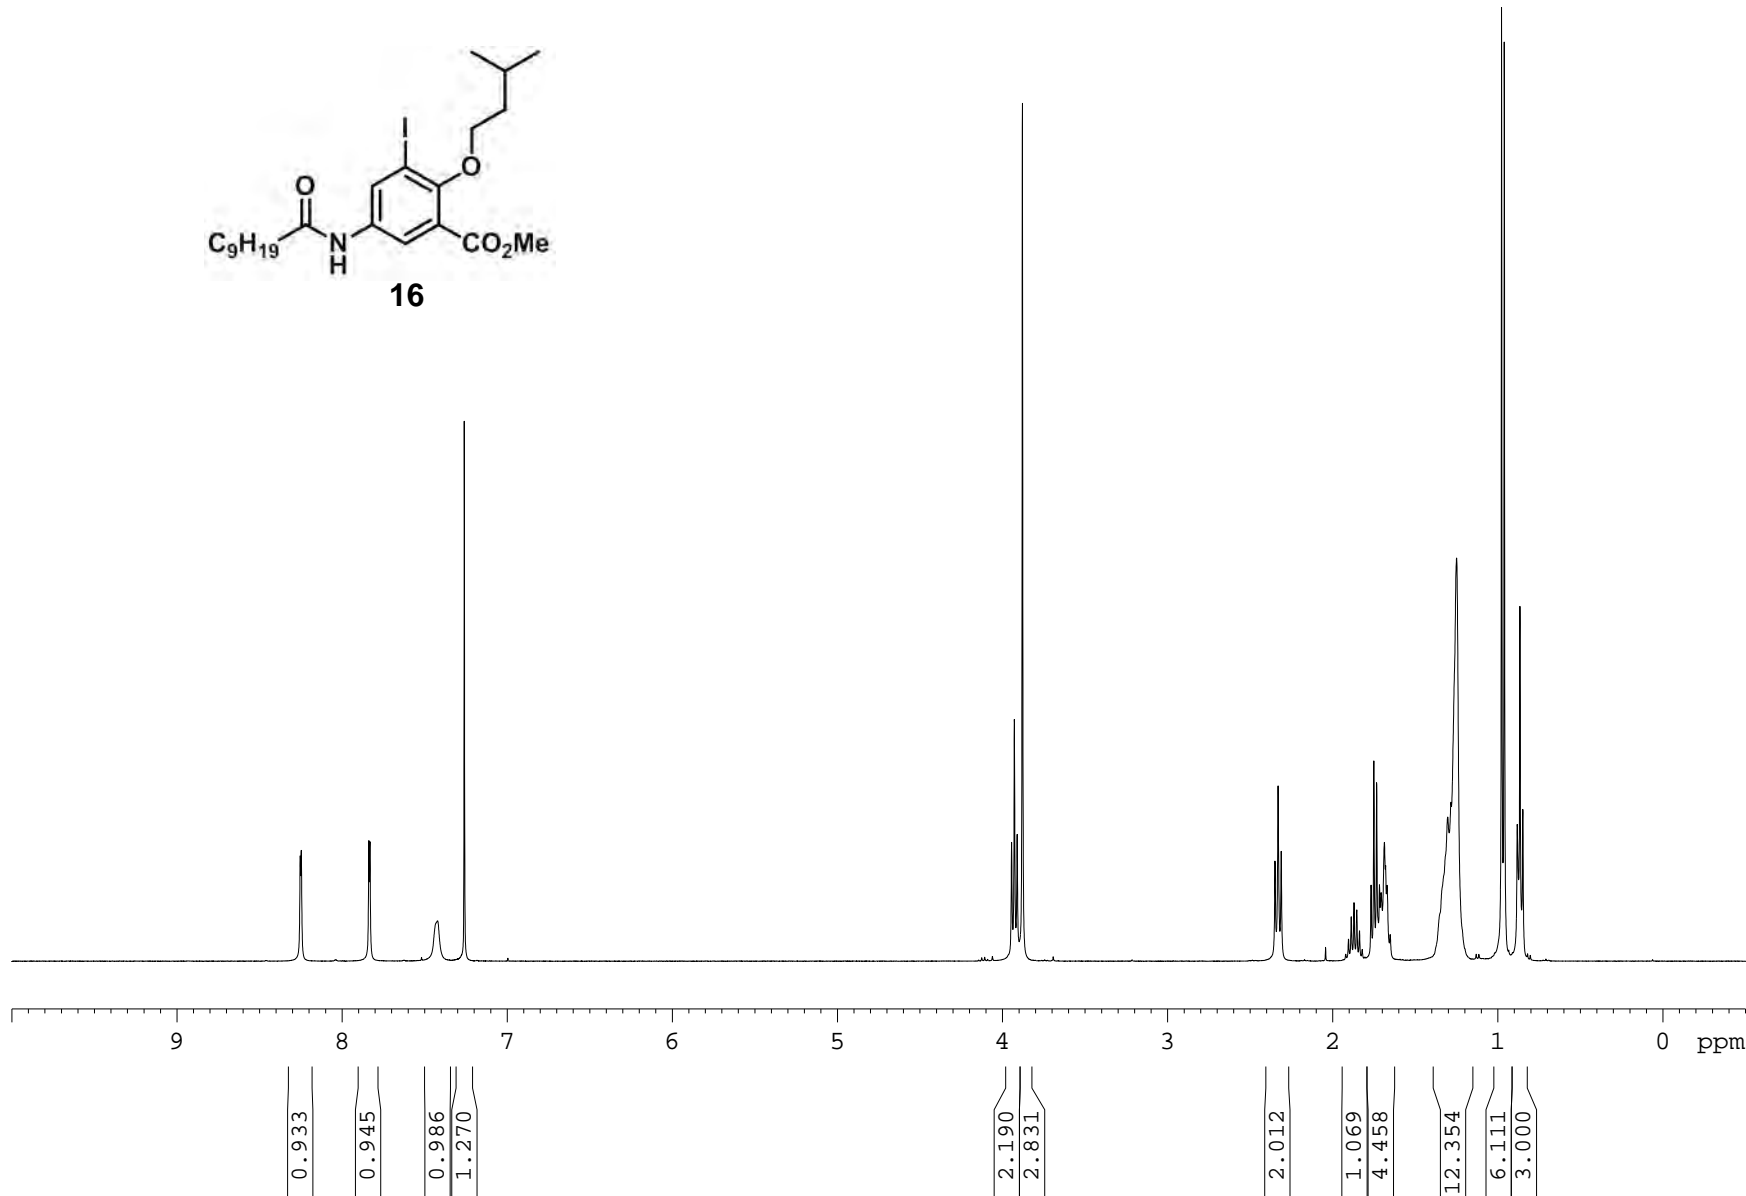

```

NAME      Sun-25032013-(1)-C9-CO2Me
EXPNO     1
PROCNO    1
Date_     20130325
Time      21.51
INSTRUM   spect
PROBHD    5 mm PADUL 13C
PULPROG   zg30
TD         32768
SOLVENT   CDCl3
NS         16
DS         2
SWH        8223.685 Hz
FIDRES     0.250967 Hz
AQ         1.9923444 sec
RG         114
DW         60.800 usec
DE         6.50 usec
TE         294.7 K
D1         1.0000000 sec
TDO        1

===== CHANNEL f1 =====
NUC1       1H
P1         15.69 usec
PL1        0.00 dB
PL1W       8.31434441 W
SFO1       400.1324710 MHz
SI         32768
SF         400.1300091 MHz
WDW        EM
SSB        0
LB         0.30 Hz
GB         0
PC         1.00
  
```

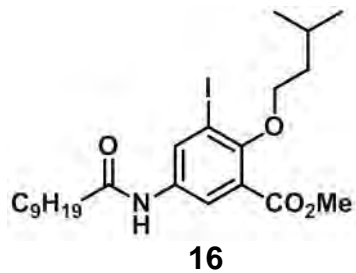

172.443  
 165.511  
 154.602  
 134.980  
 134.696  
 125.022  
 123.243  
 94.243  
 77.478  
 77.160  
 76.842  
 73.983  
 52.509  
 38.907  
 37.396  
 31.902  
 29.512  
 29.472  
 29.339  
 29.317  
 25.648  
 24.854  
 22.788  
 22.698  
 14.155

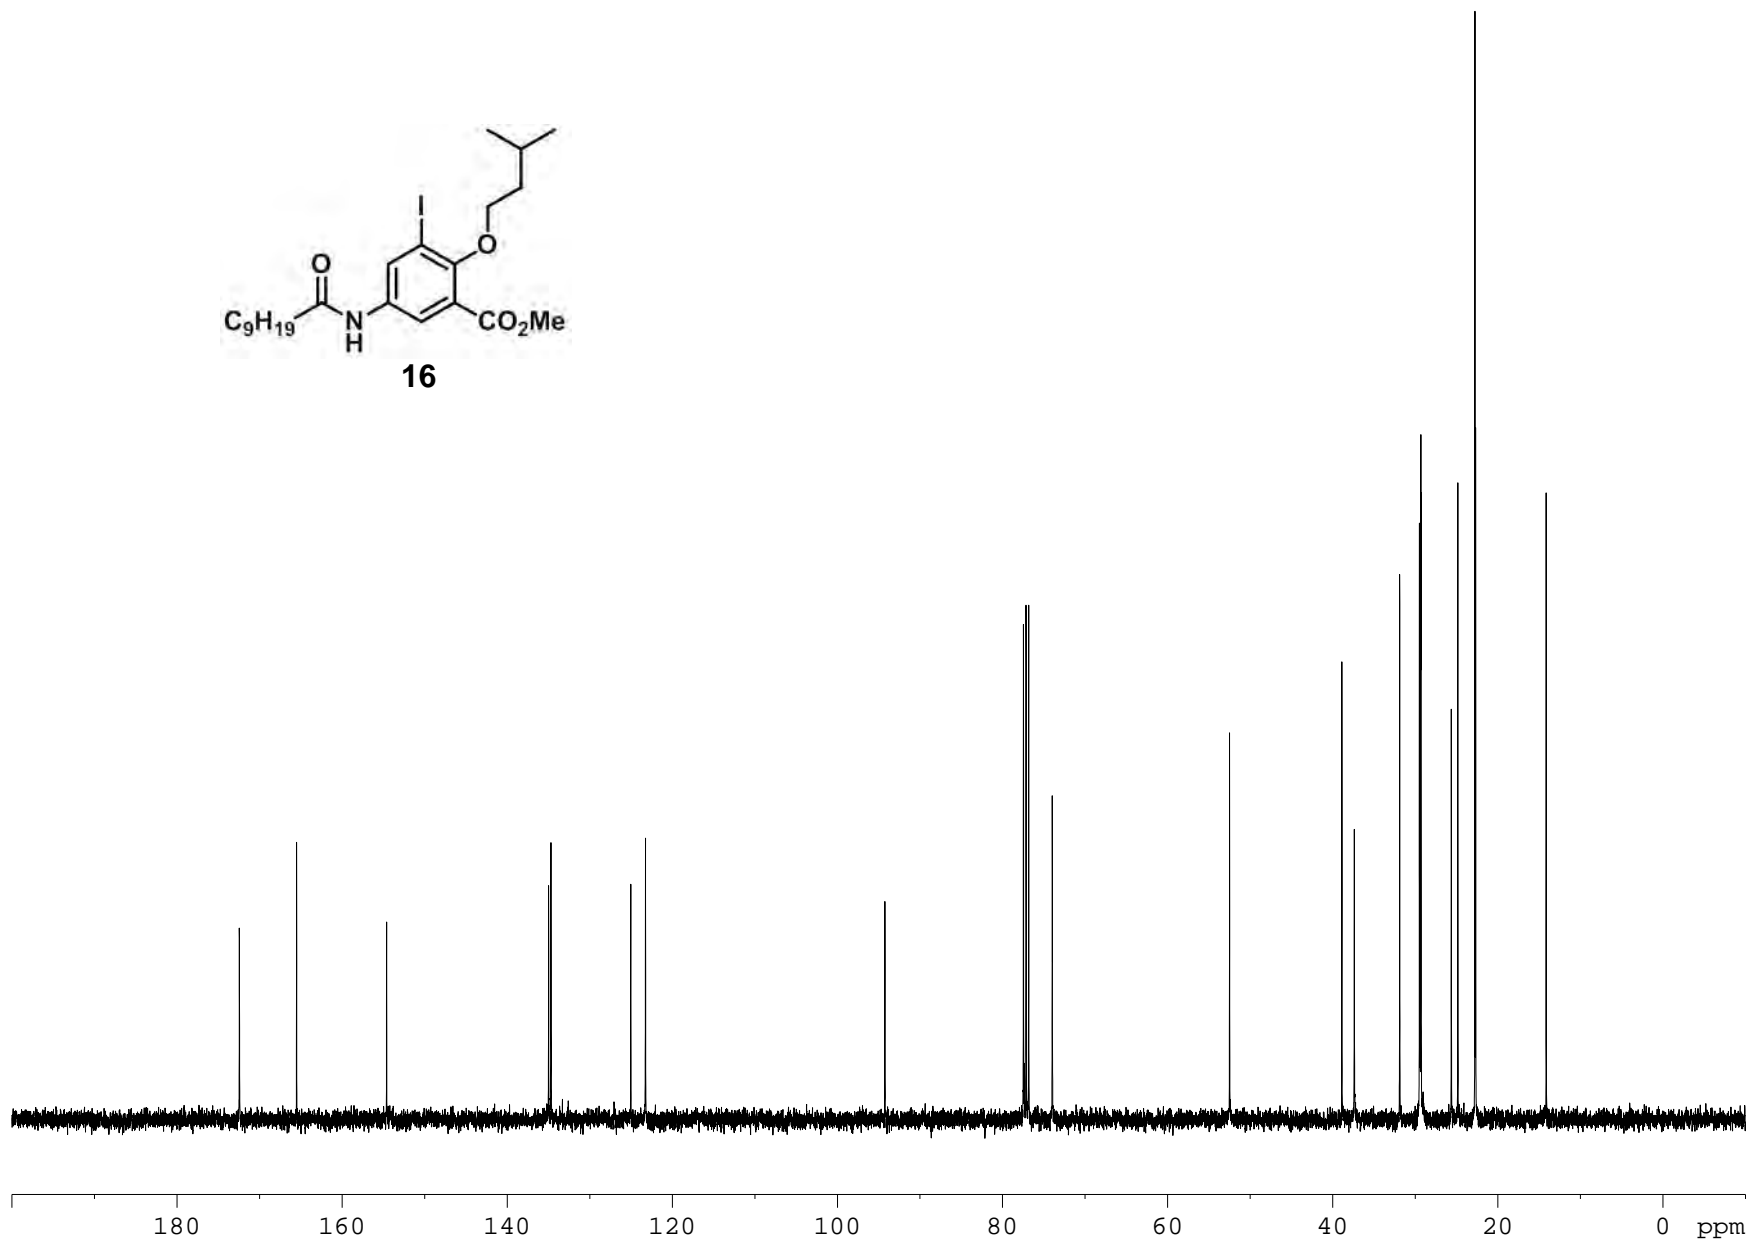

```

NAME      Sun-25032013-(1)-C9-CO2Me
EXPNO     4
PROCNO    1
Date_     20130314
Time      18.01
INSTRUM   spect
PROBHD    5 mm PABBO BB-
PULPROG   zgpg30
TD         65536
SOLVENT   CDCl3
NS         36
DS         4
SWH       24038.461 Hz
FIDRES    0.366798 Hz
AQ         1.3631968 sec
RG         575
DN         20.800 usec
DE         6.50 usec
TE         295.7 K
D1         2.0000000 sec
D11        0.0300000 sec
TD0
  
```

```

***** CHANNEL f1 *****
NUC1      13c
P1         9.90 usec
PL1        -2.00 dB
PL1W       55.33689499 W
SF01      100.6379183 MHz
  
```

```

***** CHANNEL f2 *****
CPDPRG2   waltz16
NUC2       1H
PCPD2     90.00 usec
PL2        -1.00 dB
PL12       15.16 dB
PL13       18.62 dB
PL2W       13.56617069 W
PL12W      0.32844096 W
PL13W      0.14806664 W
SF02      400.1916008 MHz
SI         32768
SF         100.6278535 MHz
WDW        EM
SSB         0
LB          1.00 Hz
GB          0
PC          1.40
  
```

hfc2007 #1-2 RT: 0.12-0.20 AV: 2 SM: 5G NL: 4.22E6  
T: + p ESI Full ms [ 99.50-800.50]

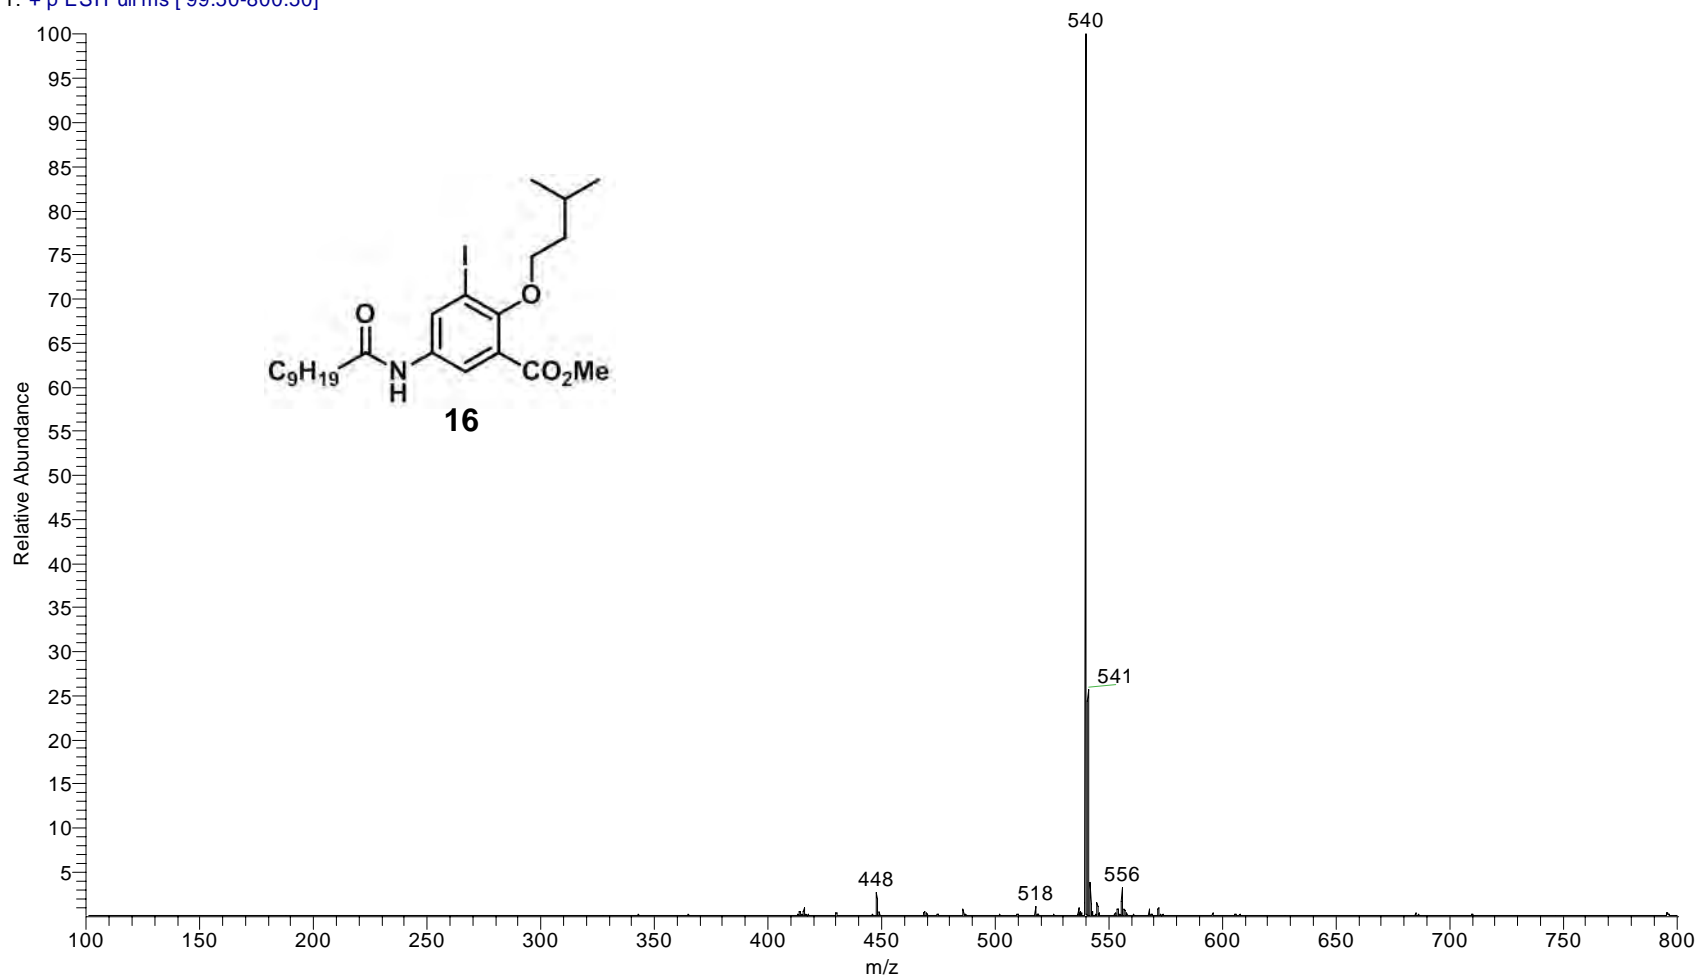

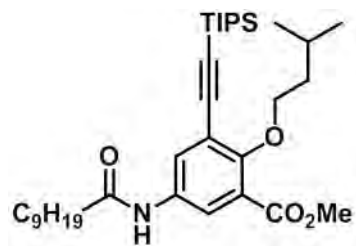

17

7.840  
7.833  
7.800  
7.793

7.260  
7.076

4.157  
4.140  
4.122  
3.882

2.349  
2.331  
2.312  
1.813  
1.797  
1.780  
1.763  
1.746  
1.734  
1.718  
1.702  
1.688  
1.671  
1.563  
1.326  
1.312  
1.251  
1.127  
0.927  
0.921  
0.891  
0.875  
0.858

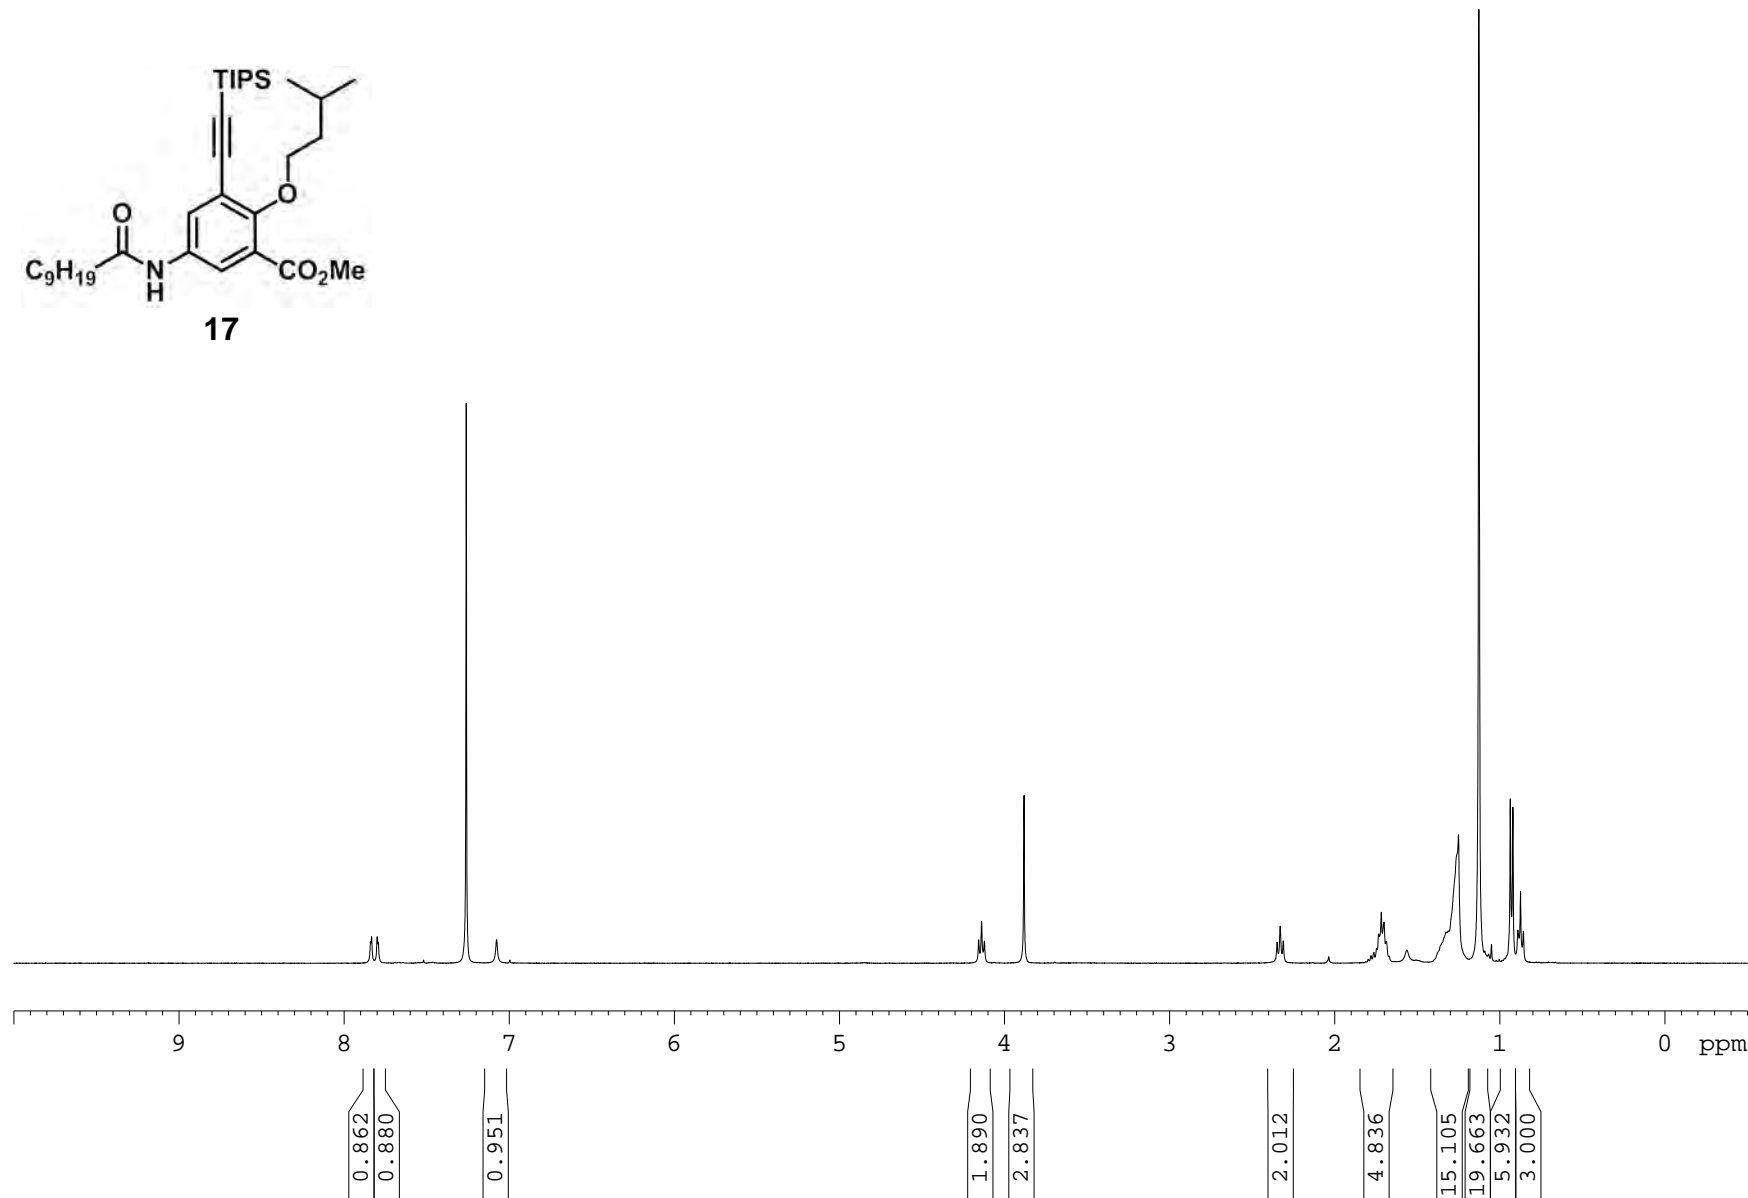

```

NAME Sun-11032013-(TIPS)-C9-CO2Me
EXPNO 1
PROCNO 1
Date_ 20130311
Time 16.55
INSTRUM spect
PROBHD 5 mm PABBO BB-
PULPROG zg30
TD 32768
SOLVENT CDCl3
NS 32
DS 2
SWH 8223.685 Hz
FIDRES 0.250967 Hz
AQ 1.9923444 sec
RG 101
DW 60.800 usec
DE 6.50 usec
TE 295.7 K
D1 1.00000000 sec
TD0 1

***** CHANNEL f1 *****
NUC1 1H
P1 14.00 usec
PL1 -1.00 dB
PLW 13.56617069 W
SFO1 400.1924713 MHz
SI 32768
SF 400.1900147 MHz
WDW EM
SSB 0
LB 0.30 Hz
GB 0
PC 1.00

```

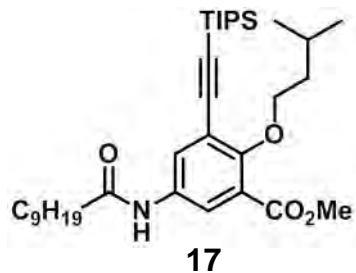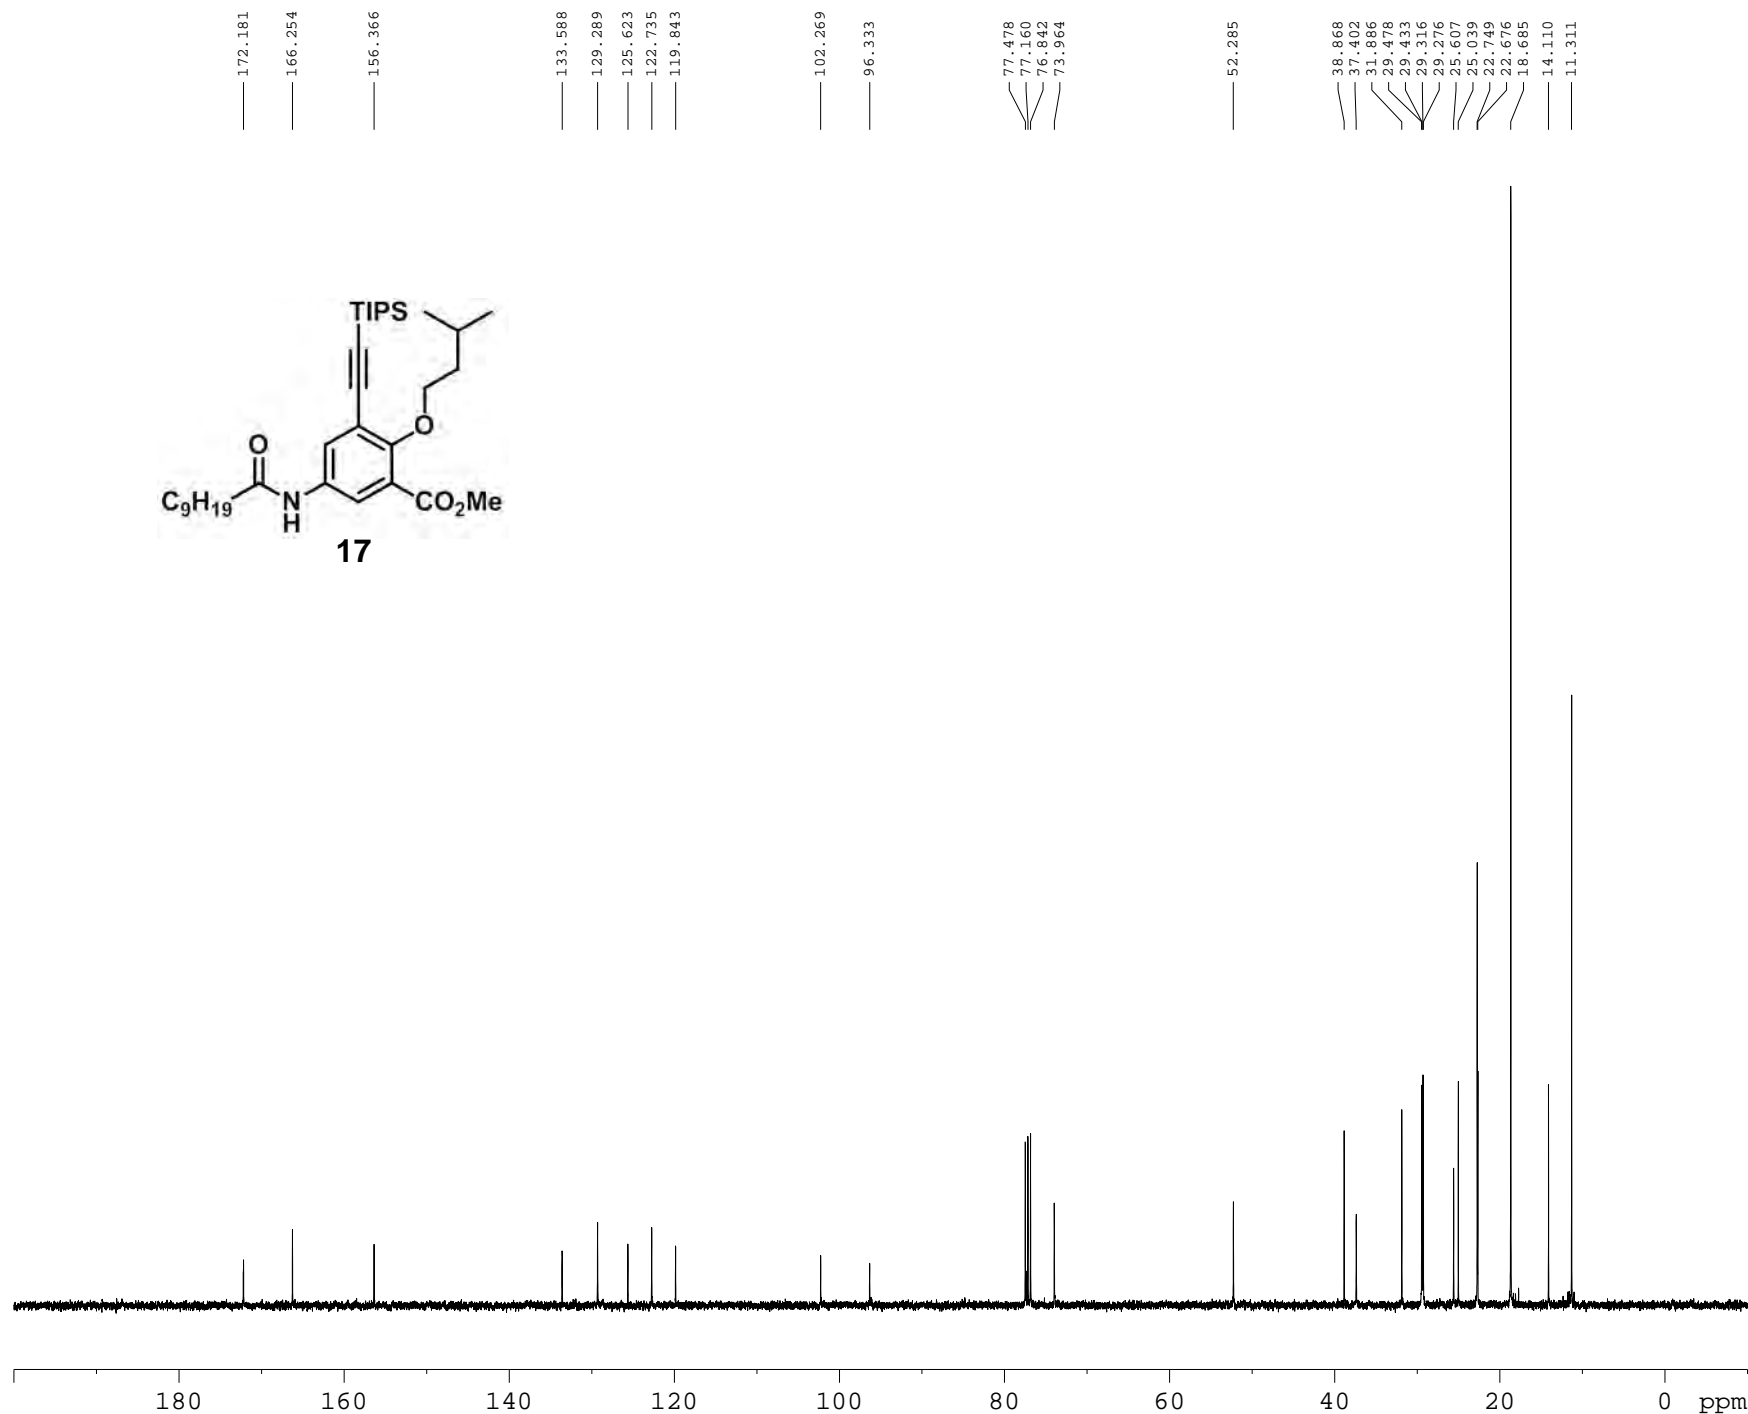

```
NAME Sun-11032013-(TIPS)-C9-CO2Me
EXPNO 3
PROCNO 1
Date_ 20130311
Time 17.19
INSTRUM spect
PROBHD 5 mm PABBO BB-
PULPROG zgpg30
TD 65536
SOLVENT CDCl3
NS 23
DS 4
SWH 24038.461 Hz
FIDRES 0.366798 Hz
AQ 1.3631988 sec
RG 575
DW 20.800 usec
DE 6.50 usec
TE 295.9 K
D1 2.0000000 sec
D11 0.0300000 sec
TD0 1
===== CHANNEL f1 =====
NUC1 13C
P1 9.90 usec
PL1 -2.00 dB
PLW 55.33689499 W
SFO1 100.6278527 MHz
===== CHANNEL f2 =====
PCPD2 waltz16
NUC2 1H
PCPD2 90.00 usec
PL2 -1.00 dB
PL12 15.16 dB
PL13 18.62 dB
PLW 13.56617069 W
PL12W 0.32844096 W
PL13W 0.14806664 W
SFO2 400.1315098 MHz
SI 32768
SF 100.6278527 MHz
WDW EM
SSB 0
LB 1.00 Hz
GB 0
PC 1.40
```

hfc1583\_130415142940 #1-3 RT: 0.14-0.31 AV: 3 SM: 5G NL: 4.04E5  
T: + p ESI Full ms [ 79.50-800.50]

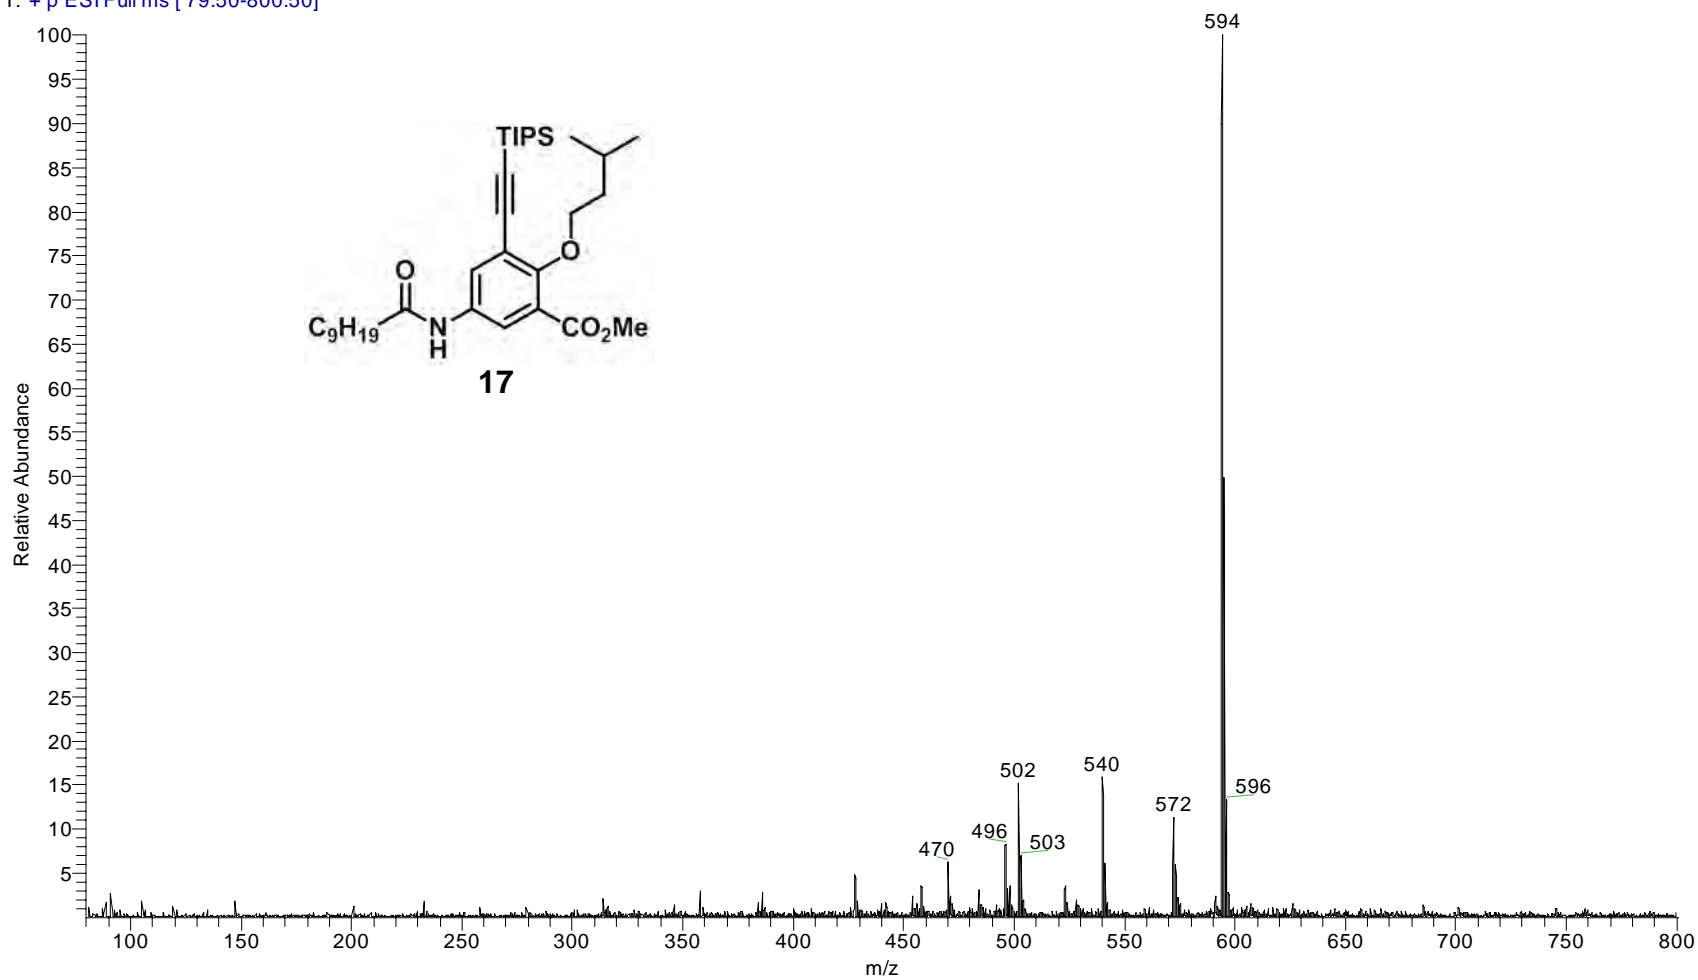

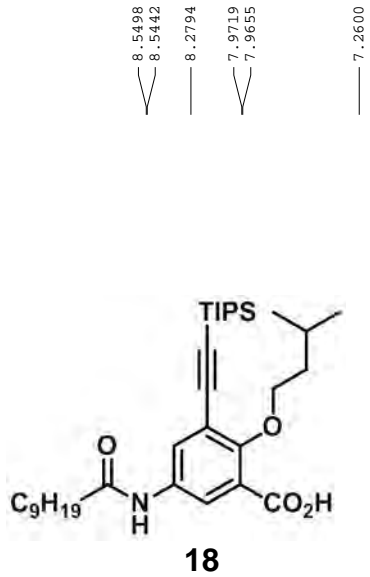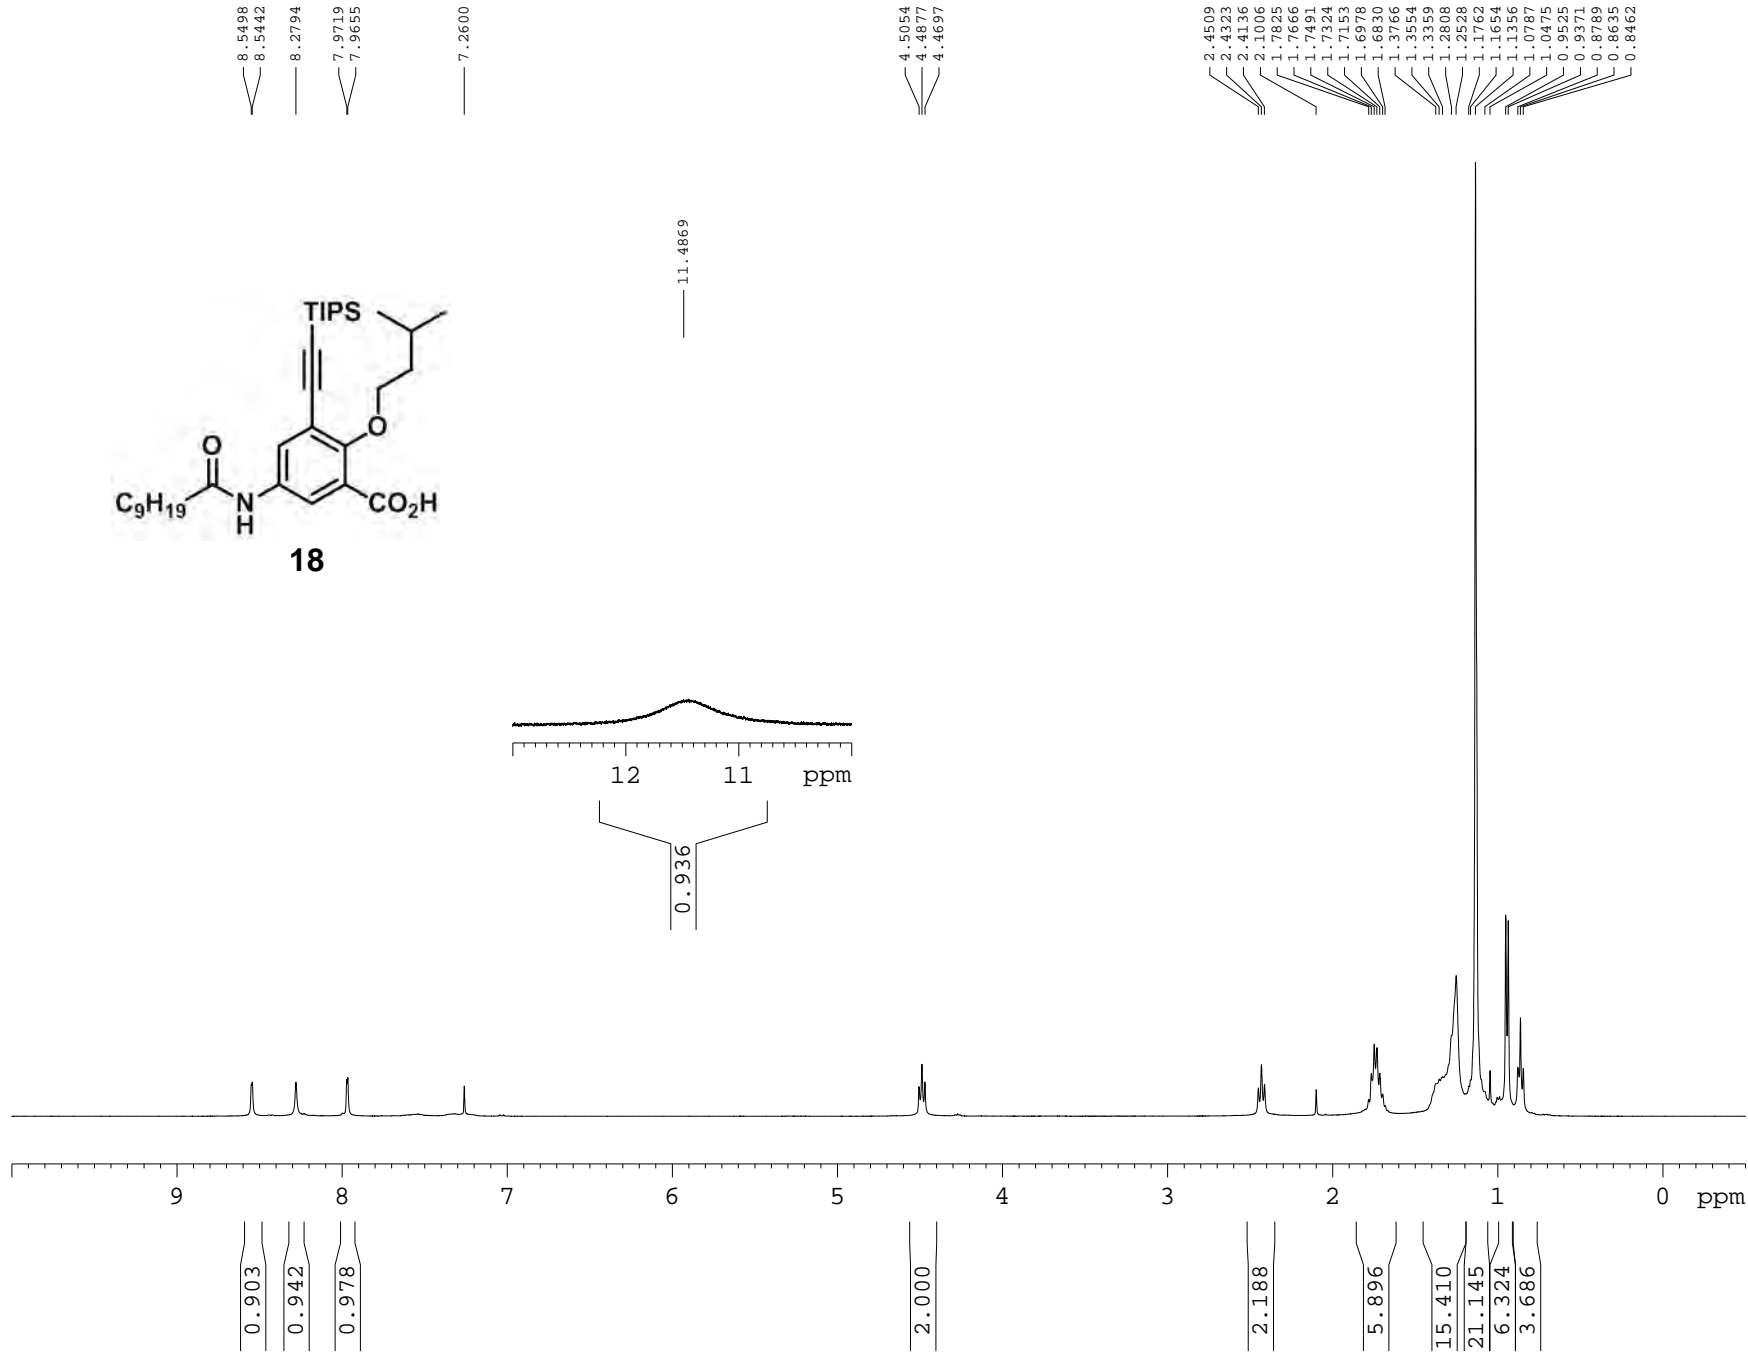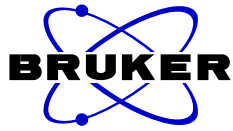

```

NAME Sun-22112013-(TIPS)-C9-COOH
EXPNO 1
PROCNO 1
Date_ 20111122
Time 21.20
INSTRUM spect
PROBHD 5 mm PADUL 13C
PULPROG zg30
TD 32768
SOLVENT CDCl3
NS 16
DS 2
SWH 8223.685 Hz
FIDRES 0.250967 Hz
AQ 1.9923444 sec
RG 101
DW 60.800 usec
DE 6.50 usec
TE 296.1 K
D1 1.0000000 sec
TDO 1

===== CHANNEL f1 =====
NUC1 1H
P1 15.69 usec
PL1 0.00 dB
PLW 8.31434441 W
SFO1 400.1324710 MHz
SI 32768
SF 400.1300087 MHz
WDW EM
SSB 0
LB 0.30 Hz
GB 0
PC 1.00
  
```



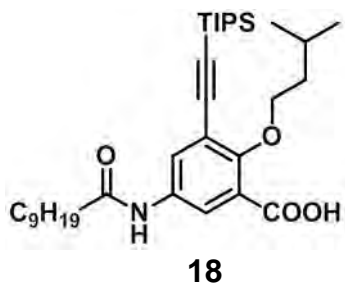

172.739

165.804

154.856

135.595

131.329

123.414

121.719

118.268

101.411

98.874

77.478

77.160

76.842

75.543

38.535

37.622

31.980

29.579

29.492

29.400

29.367

25.694

25.221

22.771

22.670

18.784

14.211

11.395

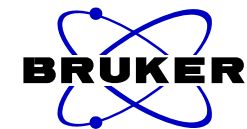

```

NAME      Sun-22112013-(TIPS)-C9-COOH
EXPNO     2
PROCNO    1
Date_     20131122
Time      21.33
INSTRUM   spect
PROBHD    5 mm PADD1 13C
PULPROG   zgpg30
TD         65536
SOLVENT   CDCl3
NS         65
DS         4
SWH        24038.461 Hz
FIDRES     0.366798 Hz
AQ         1.3631988 sec
RG         203
DW         20.800 usec
DE         6.50 usec
TE         296.3 K
D1         2.0000000 sec
D11        0.0300000 sec
TDO        1
  
```

```

***** CHANNEL f1 *****
NUC1       13C
P1         9.68 usec
PL1        -0.60 dB
PL1W       41.24164963 W
SFO1       100.6228298 MHz
  
```

```

***** CHANNEL f2 *****
CPDPRG2    waltz16
NUC2       1H
P2         90.00 usec
PL2        0.00 dB
PL2W       15.17 dB
PL13       15.92 dB
PL2W       8.31434441 W
PL12W      0.25282964 W
PL13W      0.21272963 W
SFO2       400.1316005 MHz
SI         32768
SF         100.6127573 MHz
WDW        EM
SSB        0
LB         1.00 Hz
GB         0
PC         1.40
  
```

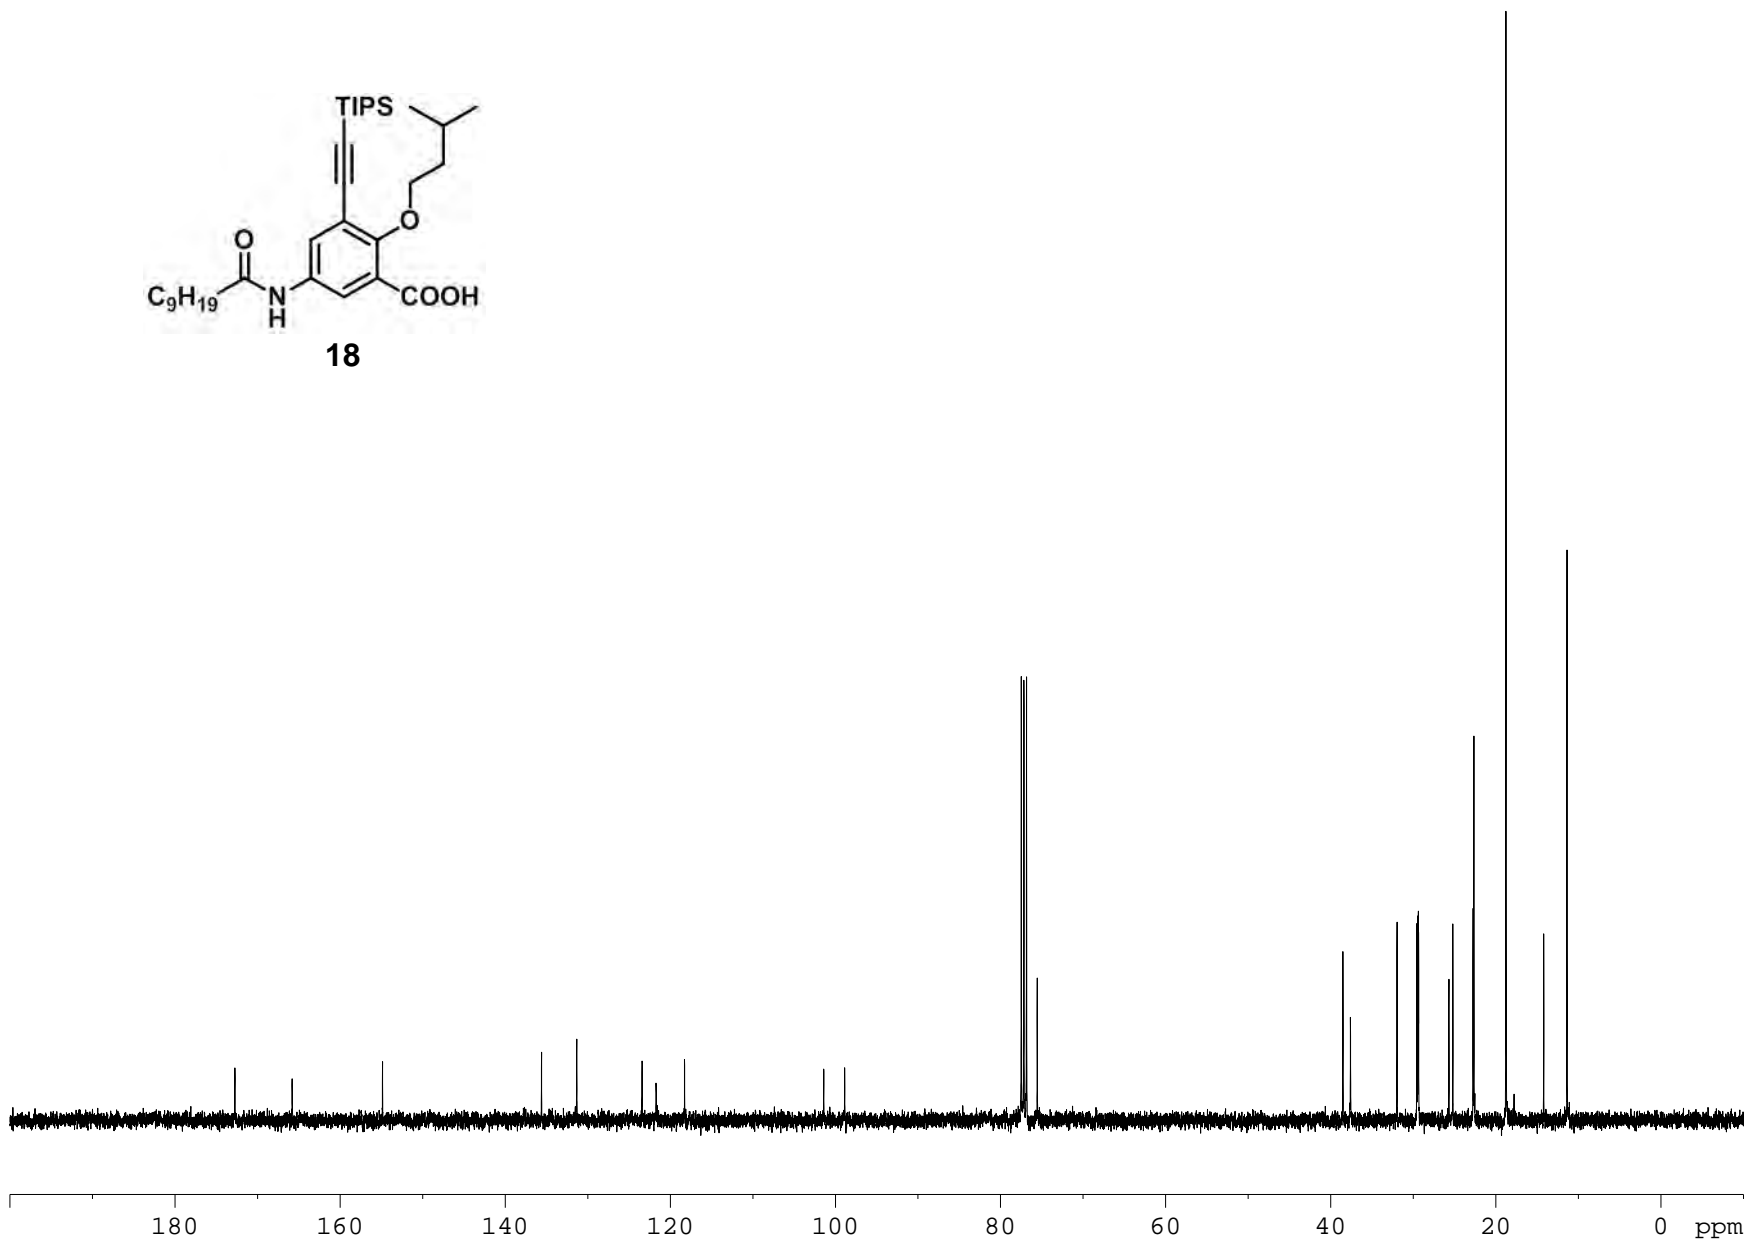

hfc2020 #2-4 RT: 0.22-0.38 AV: 3 SM: 5G NL: 2.42E5  
T: + p ESI Full ms [ 99.50-800.50]

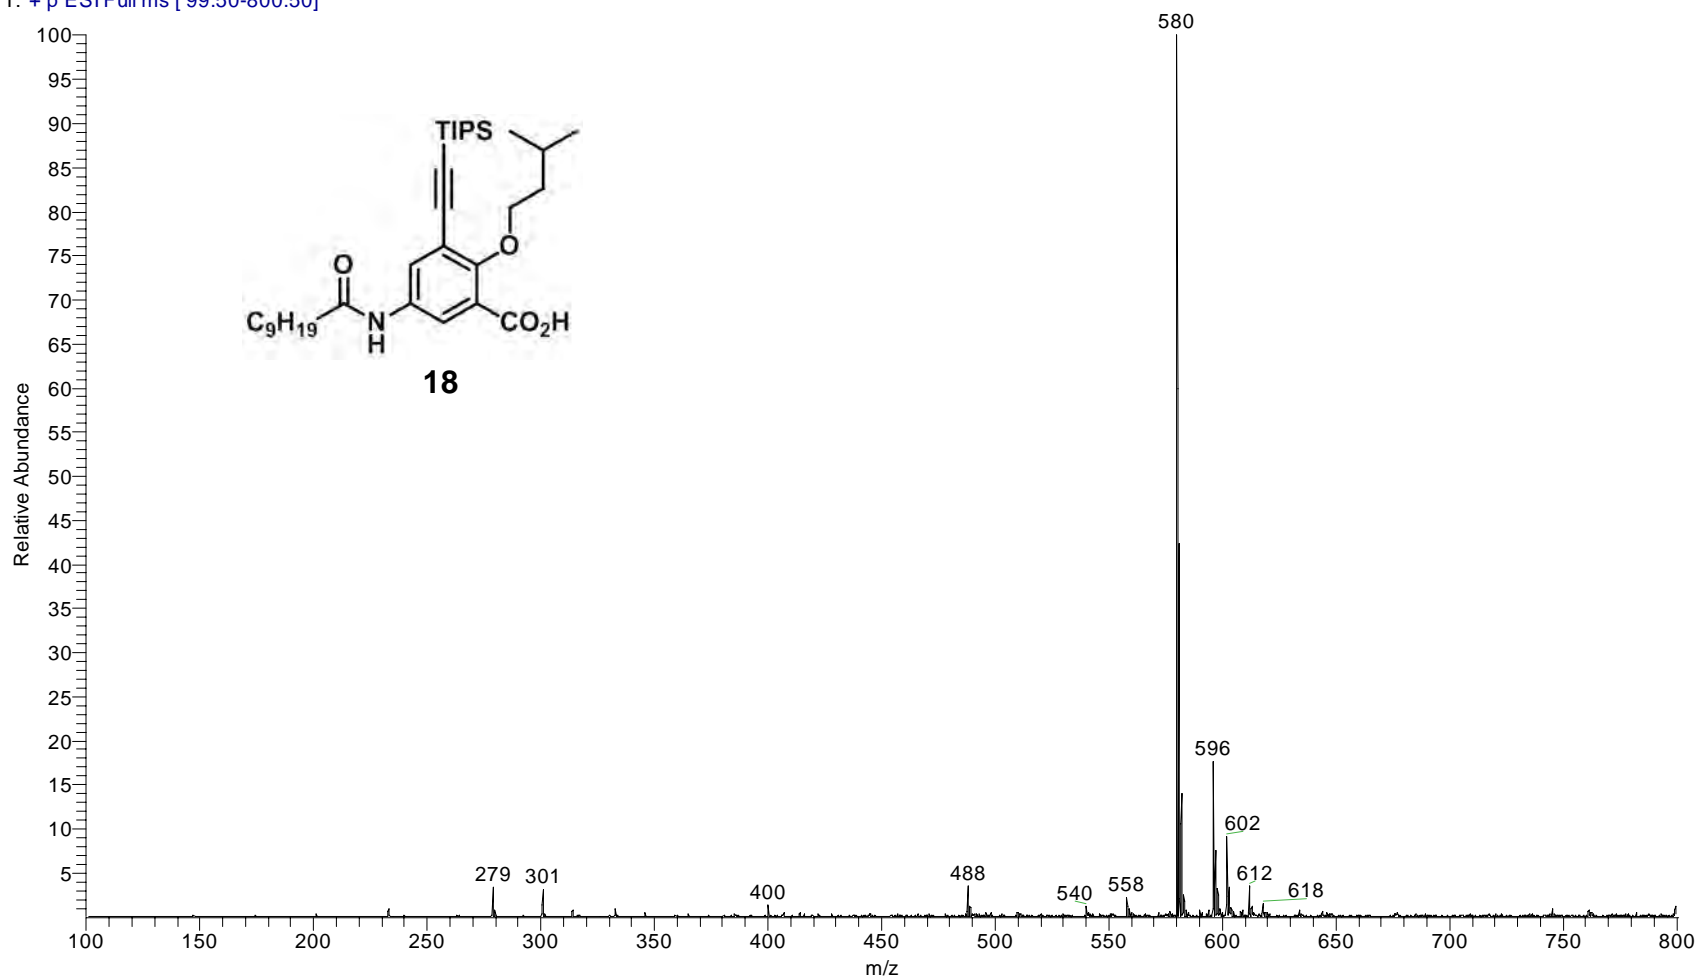

10.235  
 9.649  
 9.544  
 8.741  
 8.734  
 8.604  
 8.598  
 8.178  
 8.166  
 8.152  
 8.071  
 8.064  
 7.997  
 7.990  
 7.260

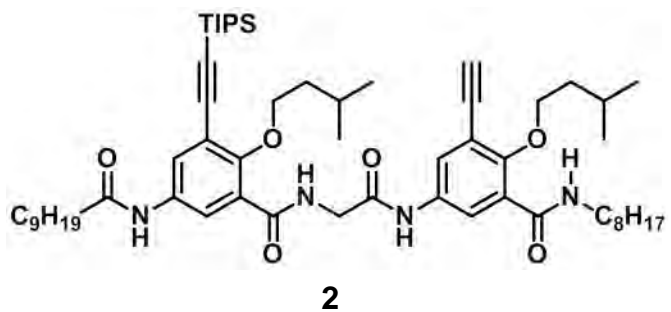

4.619  
 4.610  
 4.353  
 4.334  
 4.314  
 4.208  
 4.191  
 4.174  
 3.496  
 3.479  
 3.465  
 3.448  
 3.347  
 2.499  
 2.481  
 2.462  
 1.926  
 1.908  
 1.888  
 1.876  
 1.869  
 1.860  
 1.843  
 1.826  
 1.810  
 1.794  
 1.771  
 1.754  
 1.736  
 1.718  
 1.714  
 1.696  
 1.680  
 1.663  
 1.645  
 1.627  
 1.609  
 1.591  
 1.572  
 1.553  
 1.538  
 1.297  
 1.269  
 1.261  
 1.244  
 1.156  
 0.997  
 0.981  
 0.914



```

NAME Sun-18032013-(TIPS,CCH)-C9-C8
EXPNO 9
PROCNO 1
Date_ 20130911
Time 22.53
INSTRUM spect
PROBHD 5 mm PABBO BB-
PULPROG zg30
TD 32768
SOLVENT CDCl3
NS 16
DS 2
SWH 8223.685 Hz
FIDRES 0.250967 Hz
AQ 1.5923464 sec
RG 114
DW 60.800 usec
DE 6.50 usec
TE 297.0 K
D1 2.00000000 sec
TDO 1
***** CHANNEL f1 *****
NUC1 1H
P1 14.00 usec
PL1 -1.00 dB
PLW 13.56617069 W
SFO1 400.1924713 MHz
SI 32768
SF 400.1900151 MHz
WDW EM
SSB 0
LB 0.30 Hz
GB 0
PC 1.00
  
```

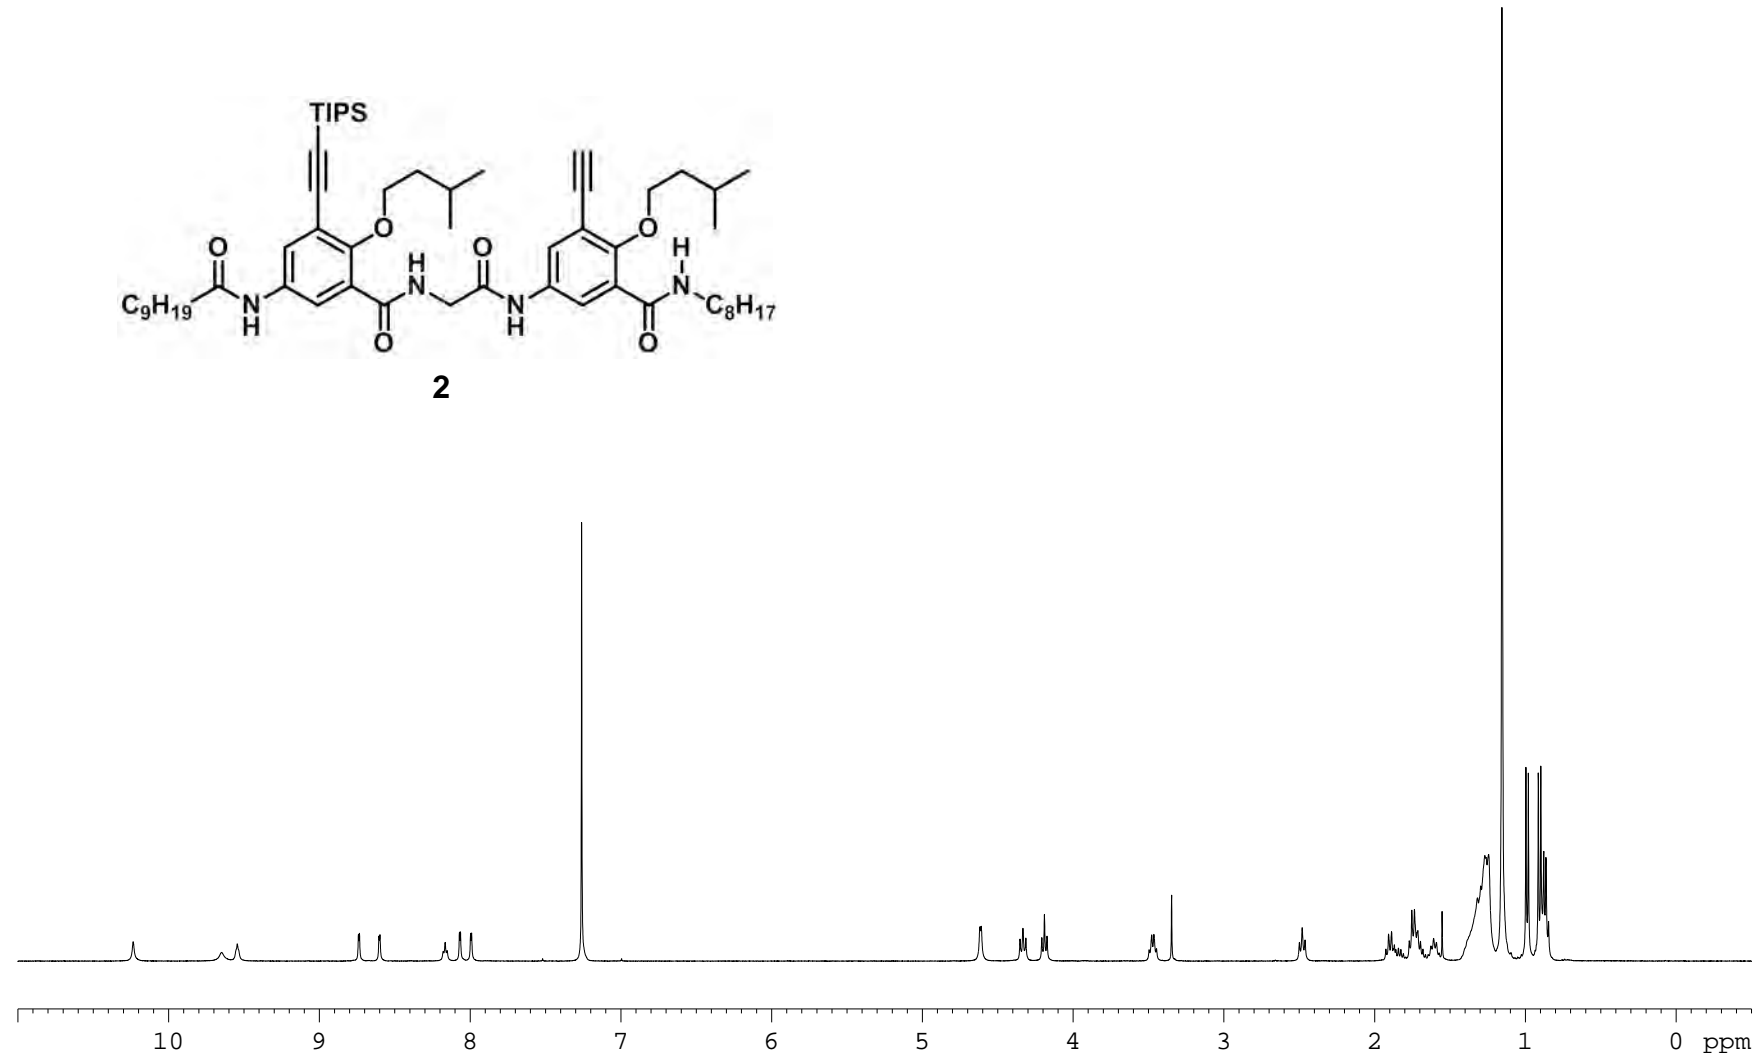

0.984  
 0.908  
 1.019  
 0.958  
 0.930  
 0.993  
 1.004  
 1.013  
 2.024  
 2.036  
 2.039  
 2.017  
 0.969  
 2.000  
 10.025  
 22.992  
 20.511  
 6.468  
 12.233



```
NAME Sun-18032013-(TIPS,CCH)-C9-C8
EXPNO 8
PROCNO 1
Data_ 20130319
Time 8.30
INSTRUM spect
PROBHD 5 mm PABUL 13C
PULPROG zgpg30
TD 65536
SOLVENT CDCl3
NS 4849
DS 4
SWH 24038.461 Hz
FIDRES 0.366798 Hz
AQ 1.363388 sec
RG 203
DW 20.800 usec
DE 6.50 usec
TE 295.7 K
D1 2.0000000 sec
D11 0.0300000 sec
TDO 1
===== CHANNEL f1 =====
NUC1 13C
P1 9.68 usec
PL1 -0.60 dB
PL1W 41.24164963 W
SFO1 100.6228298 MHz
===== CHANNEL f2 =====
CPDPRG2 waltz16
NUC2 1H
PCPD2 90.00 usec
PL2 0.00 dB
PL12 15.17 dB
PL13 15.92 dB
PL2W 8.31434441 W
PL1W 0.2528364 W
PL13W 0.21272963 W
SFO2 400.1316005 MHz
SI 32768
SF 100.6127558 MHz
WOW RM
SSB 0
LB 1.00 Hz
GB 0
PC 1.40
```

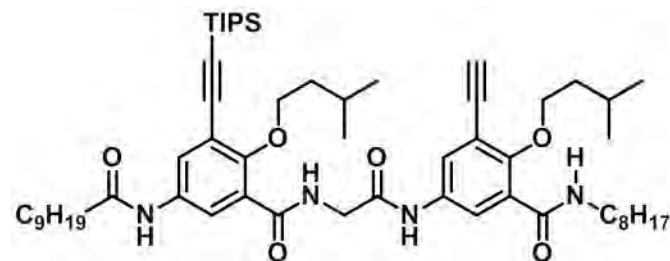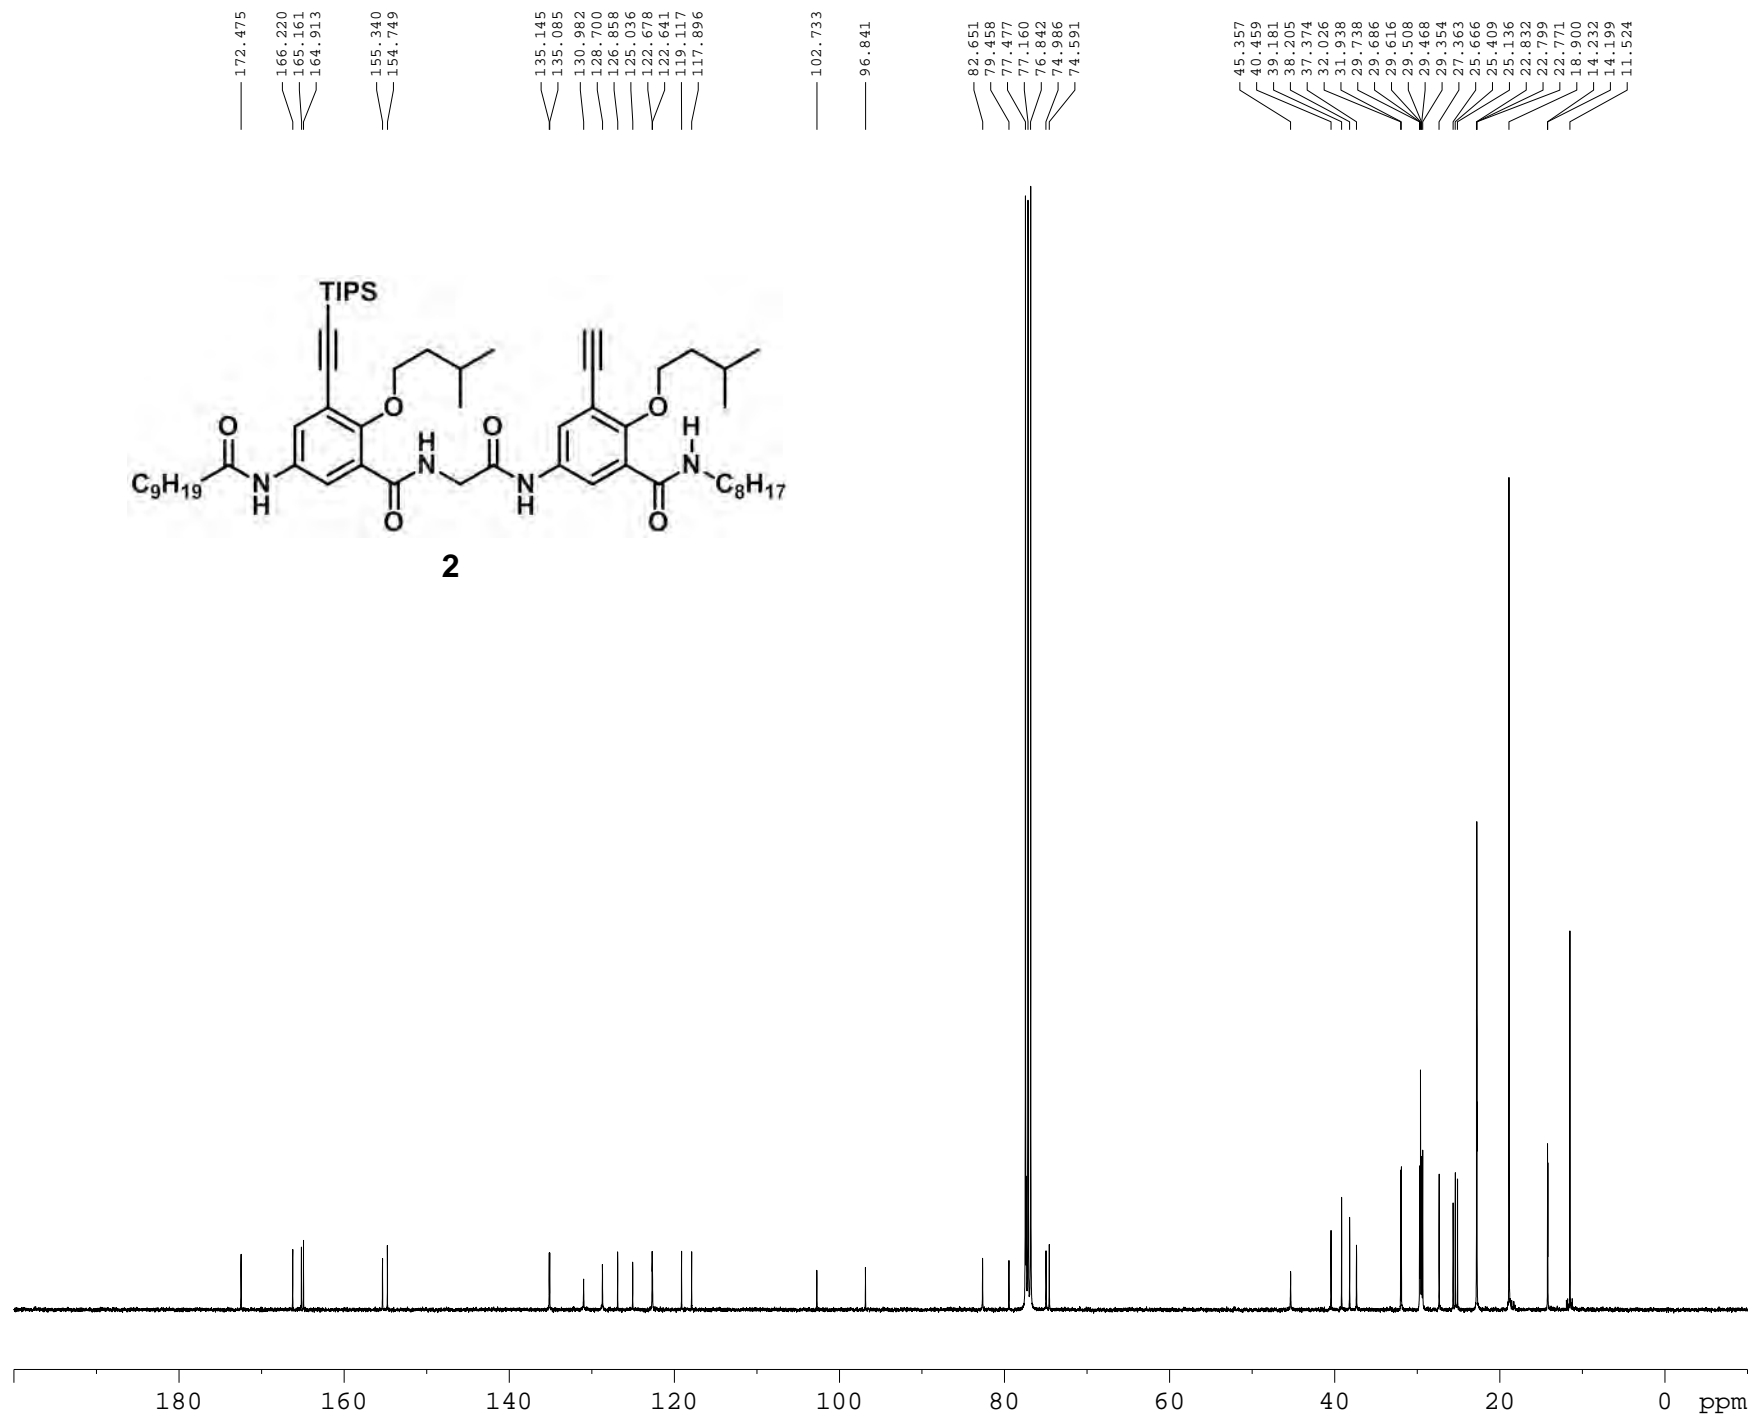

COSY spectrum of compound 2 in CDCl<sub>3</sub> at 10 mM

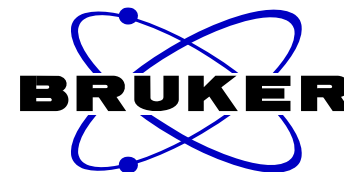

```

NAME          Sun-11092013-(TIPS,CCH)-C9-C8 10 mM
EXPNO         5
PROCNO        1
Date_         20130912
Time          4.45
INSTRUM       spect
PROBHD        5 mm PABBO BB-
PULPROG       cosygpmfzf
TD            2048
SOLVENT       CDCl3
NS            4
DS            8
SWH           5341.880 Hz
FIDRES        2.608340 Hz
AQ            0.1917428 sec
RG            2050
DW            93.600 usec
DE            6.50 usec
TE            296.5 K
D0            0.00000300 sec
D1            2.00000000 sec
Dl3           0.00000400 sec
Dl6           0.00020000 sec
INO           0.00018715 sec
    
```

```

===== CHANNEL f1 =====
NUC1          1H
P1            14.00 usec
PL1           -1.00 dB
PL1W          13.56617069 W
SFO1          400.1924060 MHz
    
```

```

===== GRADIENT CHANNEL =====
GPNAM1        SINE.100
GPNAM2        SINE.100
GPNAM3        SINE.100
GPZ1          16.00 %
GPZ2          12.00 %
GPZ3          40.00 %
P16           1000.00 usec
NDO           1
TD            128
SFO1          400.1924 MHz
FIDRES        41.739697 Hz
SW            13.350 ppm
FnMODE        QF
SI            1024
SF            400.1900132 MHz
WDW           SINE
SSB           0
LB            0.00 Hz
GB            0
PC            1.40
SI            1024
MC2           QF
SF            400.1900121 MHz
WDW           SINE
SSB           0
LB            0.00 Hz
GB            0
    
```

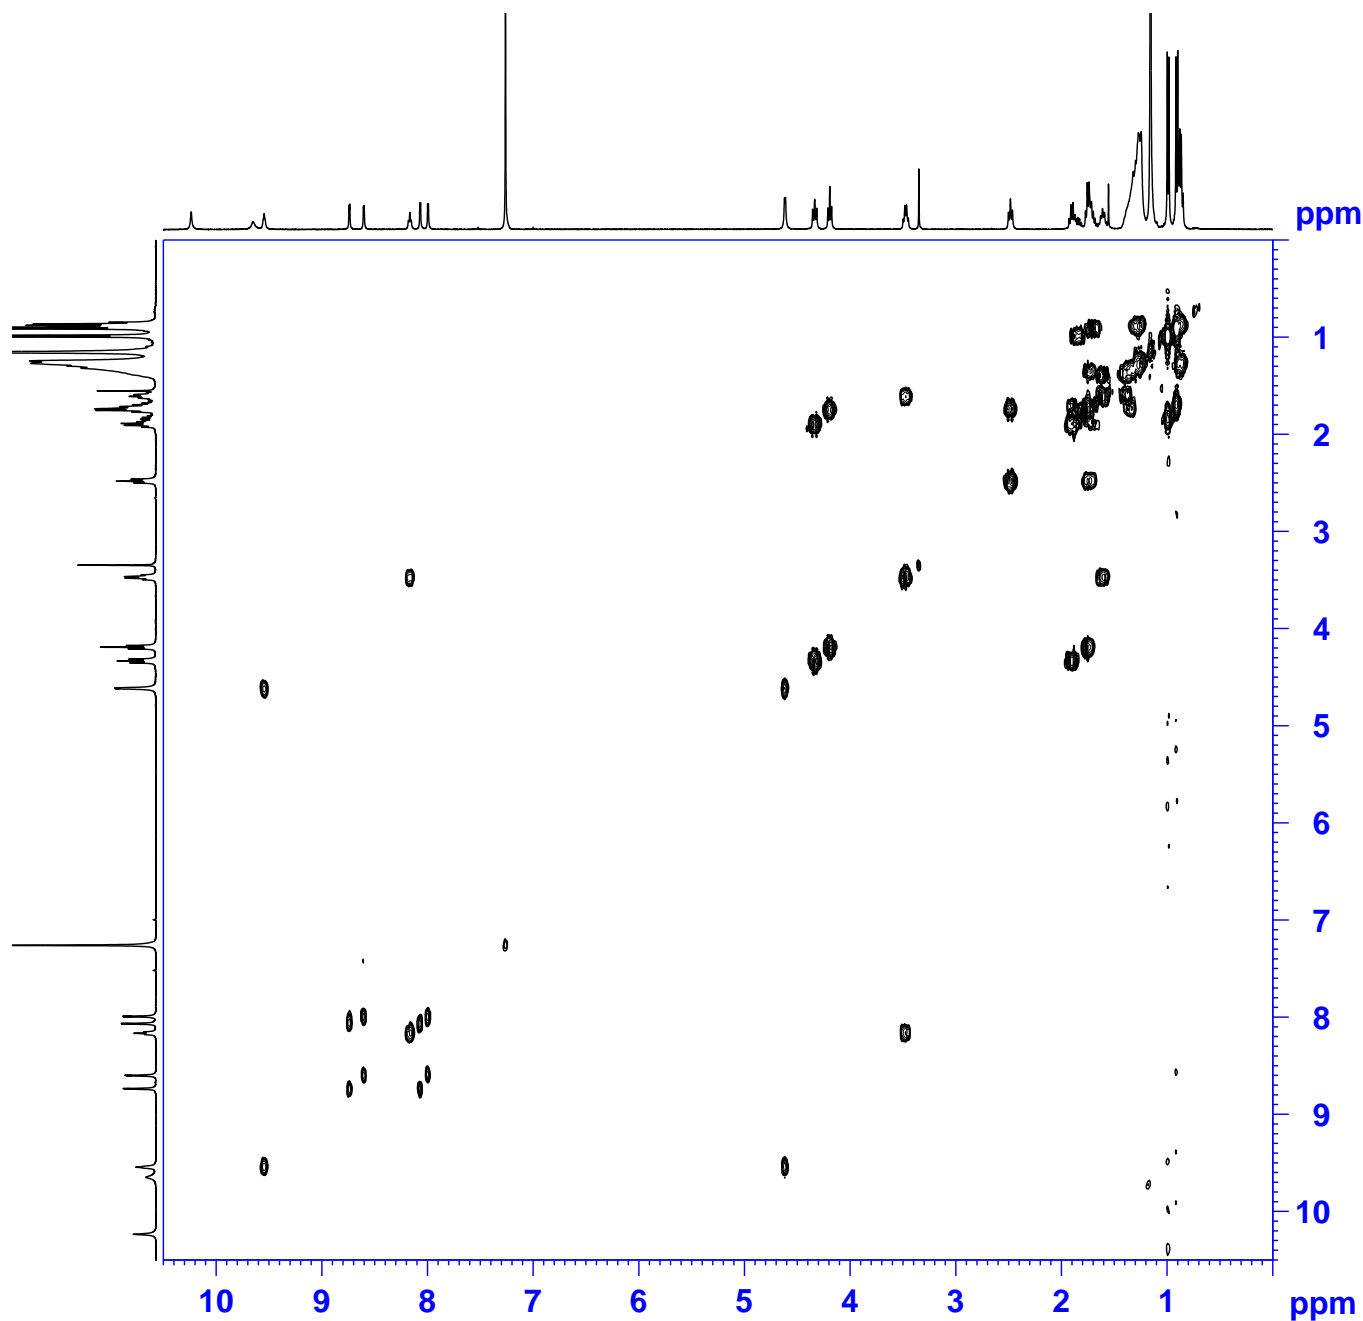

HSQC spectrum of compound 2

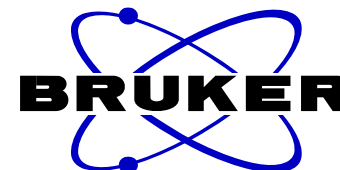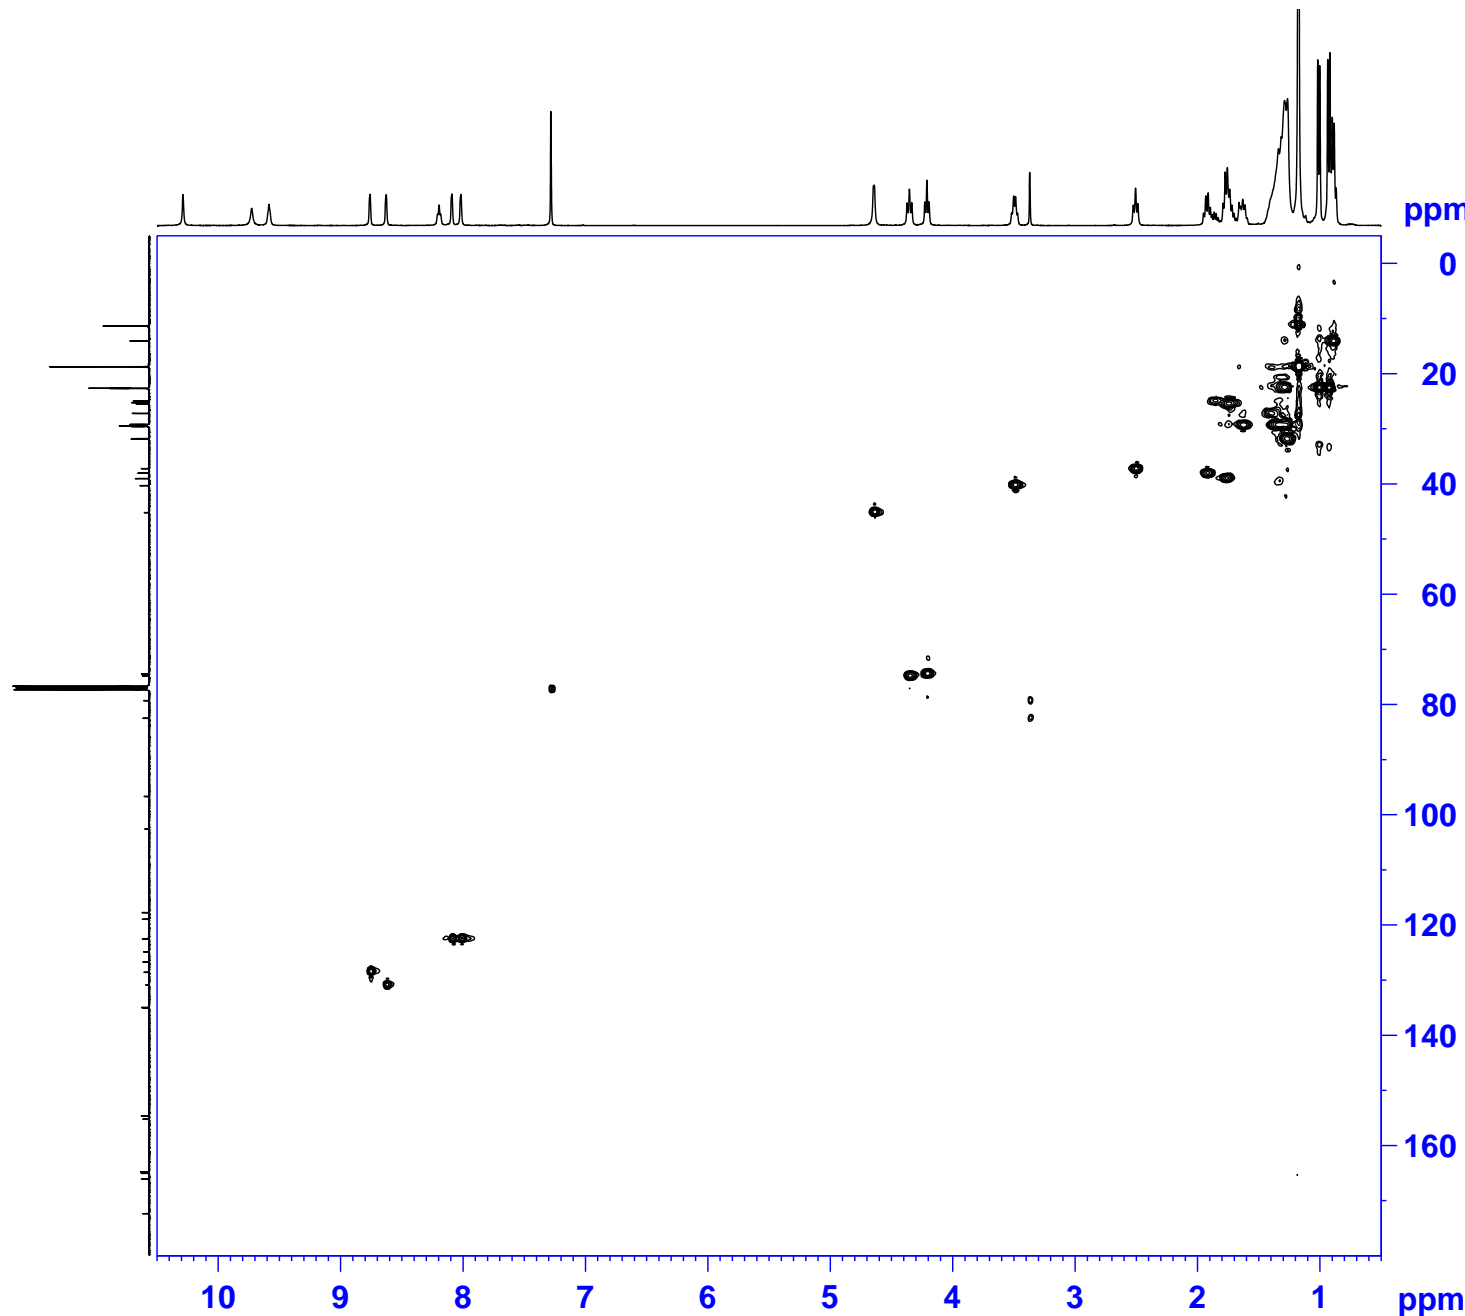

```

NAME Sun-18032013-(TIPS,CCH)-C9-C8
EXPNO 7
PROCNO 1
Date_ 20130319
Time 3.38
INSTRUM spect
PROBHD 5 mm PADUL 13C
PULPROG hsqcetgp
TD 1024
SOLVENT CDCl3
NS 2
DS 16
SWH 5341.880 Hz
FIDRES 5.216680 Hz
AQ 0.0958964 sec
RG 203
DW 93.600 usec
DE 6.50 usec
TE 294.8 K
CNST2 145.0000000
D0 0.00000300 sec
D1 1.50000000 sec
D4 0.00172414 sec
D11 0.03000000 sec
D13 0.00000400 sec
D16 0.00020000 sec
IN0 0.00002260 sec
ZGPTNS

===== CHANNEL f1 =====
NUC1 1H
P1 15.69 usec
P2 31.38 usec
P28 0.00 usec
PL1 0.00 dB
PL1W 8.31434441 W
SFO1 400.1324057 MHz

===== CHANNEL f2 =====
CPDPRG2 garp
NUC2 13C
P3 9.68 usec
P4 19.36 usec
PCPD2 80.00 usec
PL2 -0.60 dB
PL12 17.74 dB
PL2W 41.24164963 W
PL12W 0.60441613 W
SFO2 100.6202727 MHz

===== GRADIENT CHANNEL =====
GPNAM1 SINE.100
GPNAM2 SINE.100
GPZ1 80.00 %
GPZ2 20.10 %
P16 1000.00 usec
ND0 2
TD 256
SFO1 100.6203 MHz
FIDRES 86.470551 Hz
SW 220.000 ppm
FnMODE Echo-Antiecho
SI 1024
SF 400.1300000 MHz
WDW QSINE
SSB 2
LB 0.00 Hz
GB 0
PC 1.40
SI 1024
MC2 echo-antiecho
SF 100.6127690 MHz
WDW QSINE
SSB 2
LB 0.00 Hz
GB 0
    
```

ROESY spectrum of compound **2** in CDCl<sub>3</sub> at 10 mM

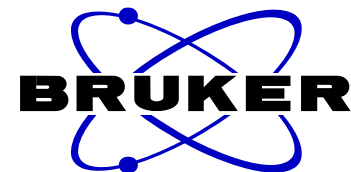

```

NAME      Sun-11092013-(TIPS,CCH)-C9-C8 10 mM
EXPNO     3
PROCNO    1
Date_     20130911
Time      23.02
INSTRUM   spect
PROBHD    5 mm PABBO BB-
PULPROG   roesyph
TD         2048
SOLVENT   CDCl3
NS         16
DS         4
SWH        4391.101 Hz
FIDRES     2.144092 Hz
AQ         0.2332489 sec
RG          287
DW         113.867 usec
DE         6.50 usec
TE         296.8 K
D0         0.00010095 sec
D1         2.00000000 sec
D12        0.00002000 sec
IN0        0.00022775 sec
    
```

```

===== CHANNEL f1 =====
NUC1      1H
P1        14.00 usec
P15       200000.00 usec
PL1       -1.00 dB
PL11      18.02 dB
PL1W      13.56617069 W
PL11W     0.17000327 W
SF01      400.1922156 MHz
ND0        1
TD         256
SF01      400.1922 MHz
FIDRES    17.152769 Hz
SW         10.973 ppm
FnMODE    States-TPPI
SI         1024
SF         400.1900153 MHz
WDW        QSINE
SSB        2
LB         0.00 Hz
GB         0
PC         1.00
SI         1024
MC2        States-TPPI
SF         400.1900124 MHz
WDW        QSINE
SSB        2
LB         0.00 Hz
GB         0
    
```

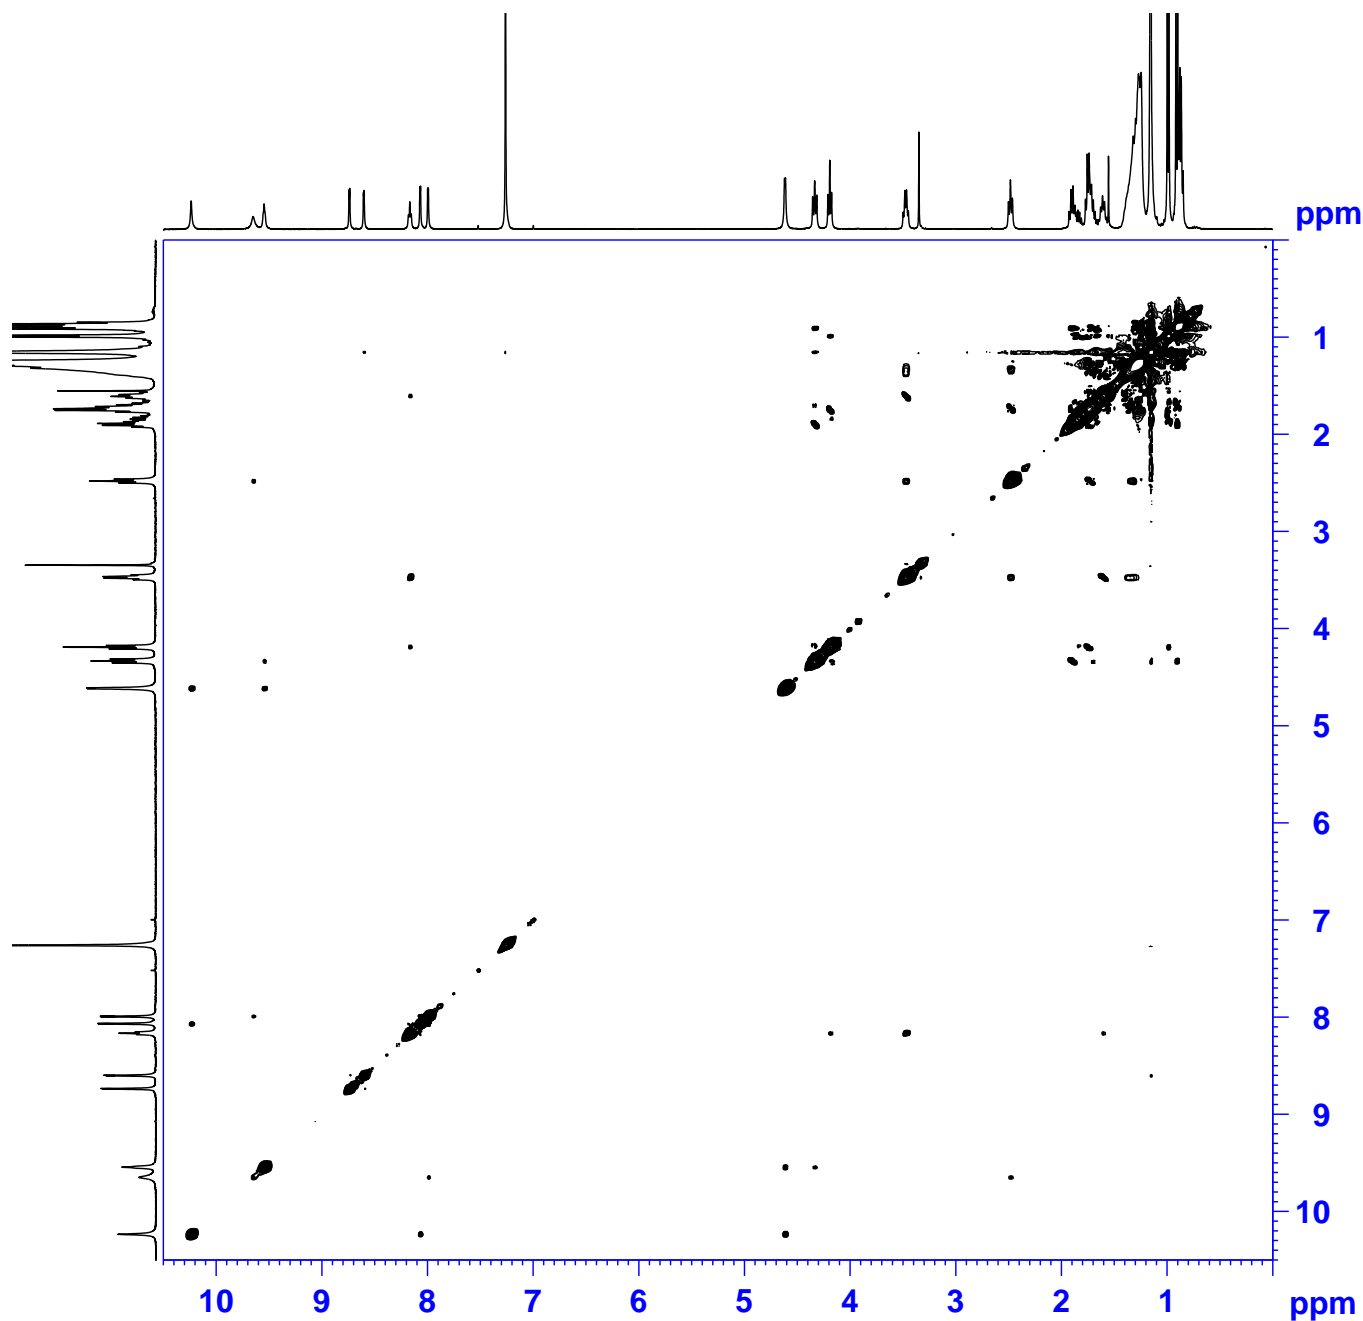

hfc1585 #1-4 RT: 0.13-0.36 AV: 4 SM: 5G NL: 2.04E6  
T: + p ESI Full ms [ 99.50-3000.50]

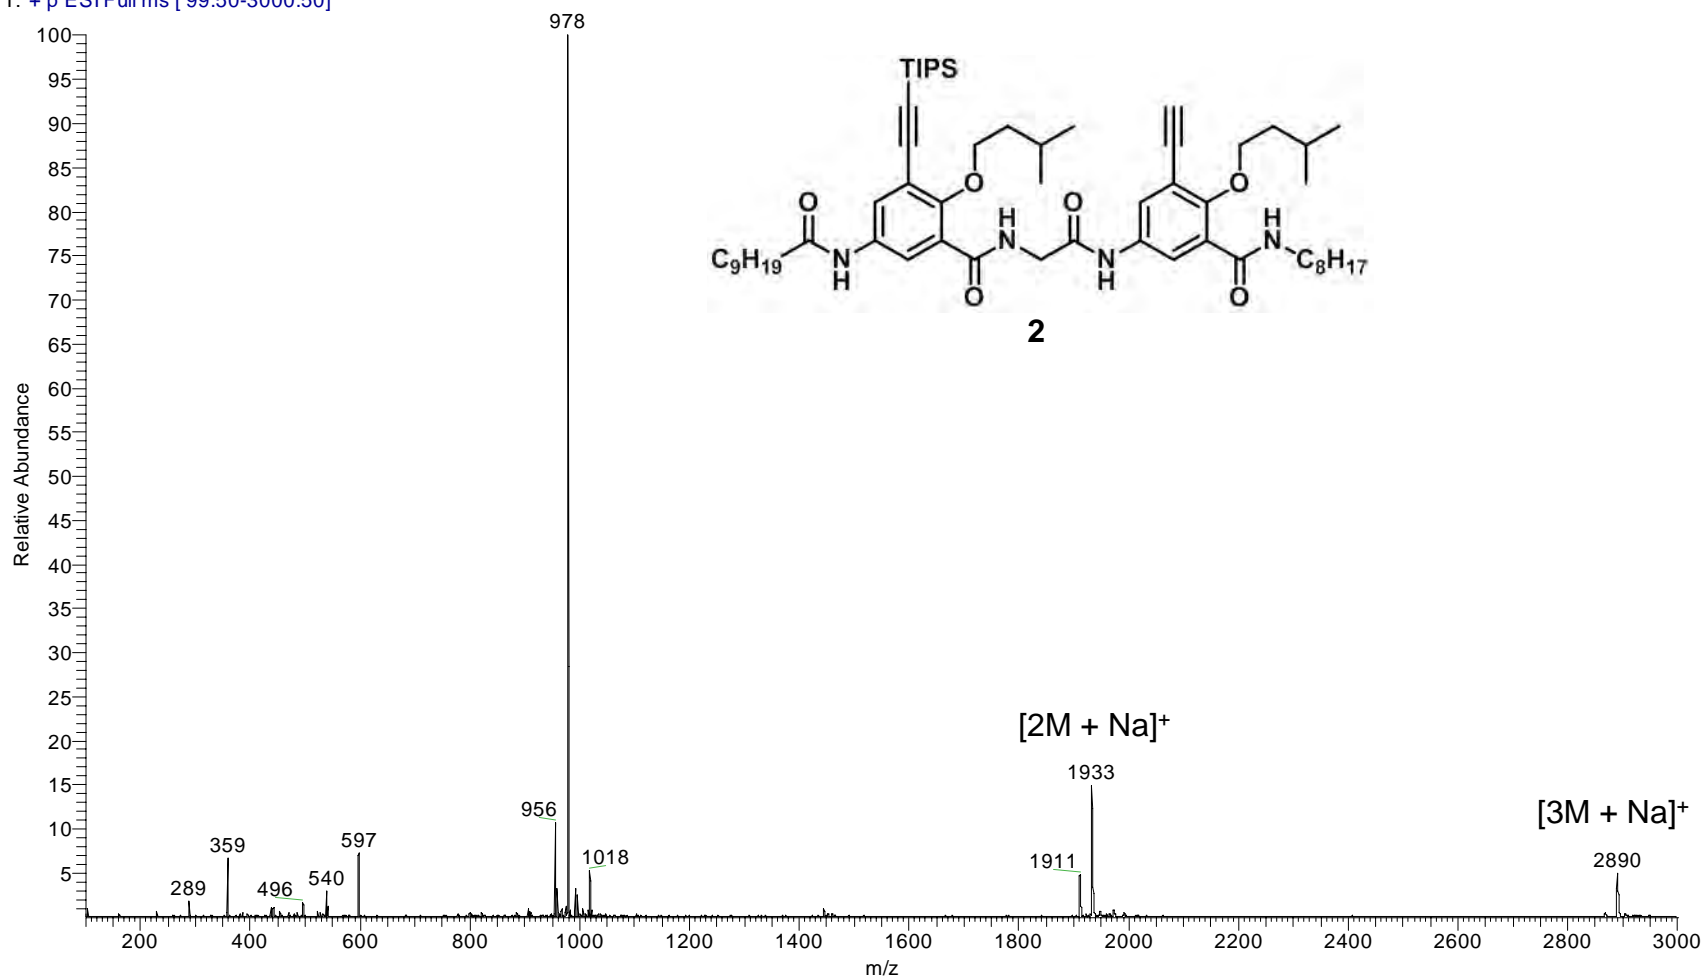



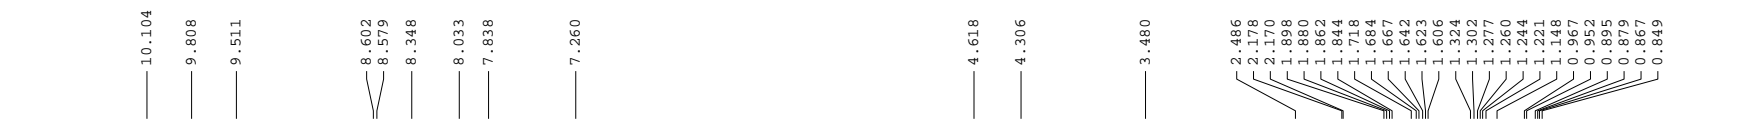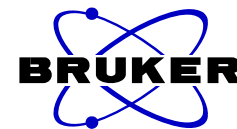

```

NAME      Sun-12032014-(TIPS,Pt)-C9-C8)2
EXPNO     1
PROCNO    1
DATE_     20140312
Time      20.37
INSTRUM   spect
PROBHD    5 mm PABBO BB-
PULPROG   zg30
TD         32768
SOLVENT   CDCl3
NS         16
DS         2
SWH        8223.685 Hz
FIDRES     0.250967 Hz
AQ         1.9923444 sec
RG         40.3
DW         60.800 usec
DE         6.50 usec
TE         296.5 K
D1         1.00000000 sec
TDO        1
===== CHANNEL f1 =====
NUC1       1H
P1         14.00 usec
PL1        -1.00 dB
SFO1       400.1924713 MHz
SF          32768
WDW         EM
SSB         0
LB          0.30 Hz
GB          1.00
  
```

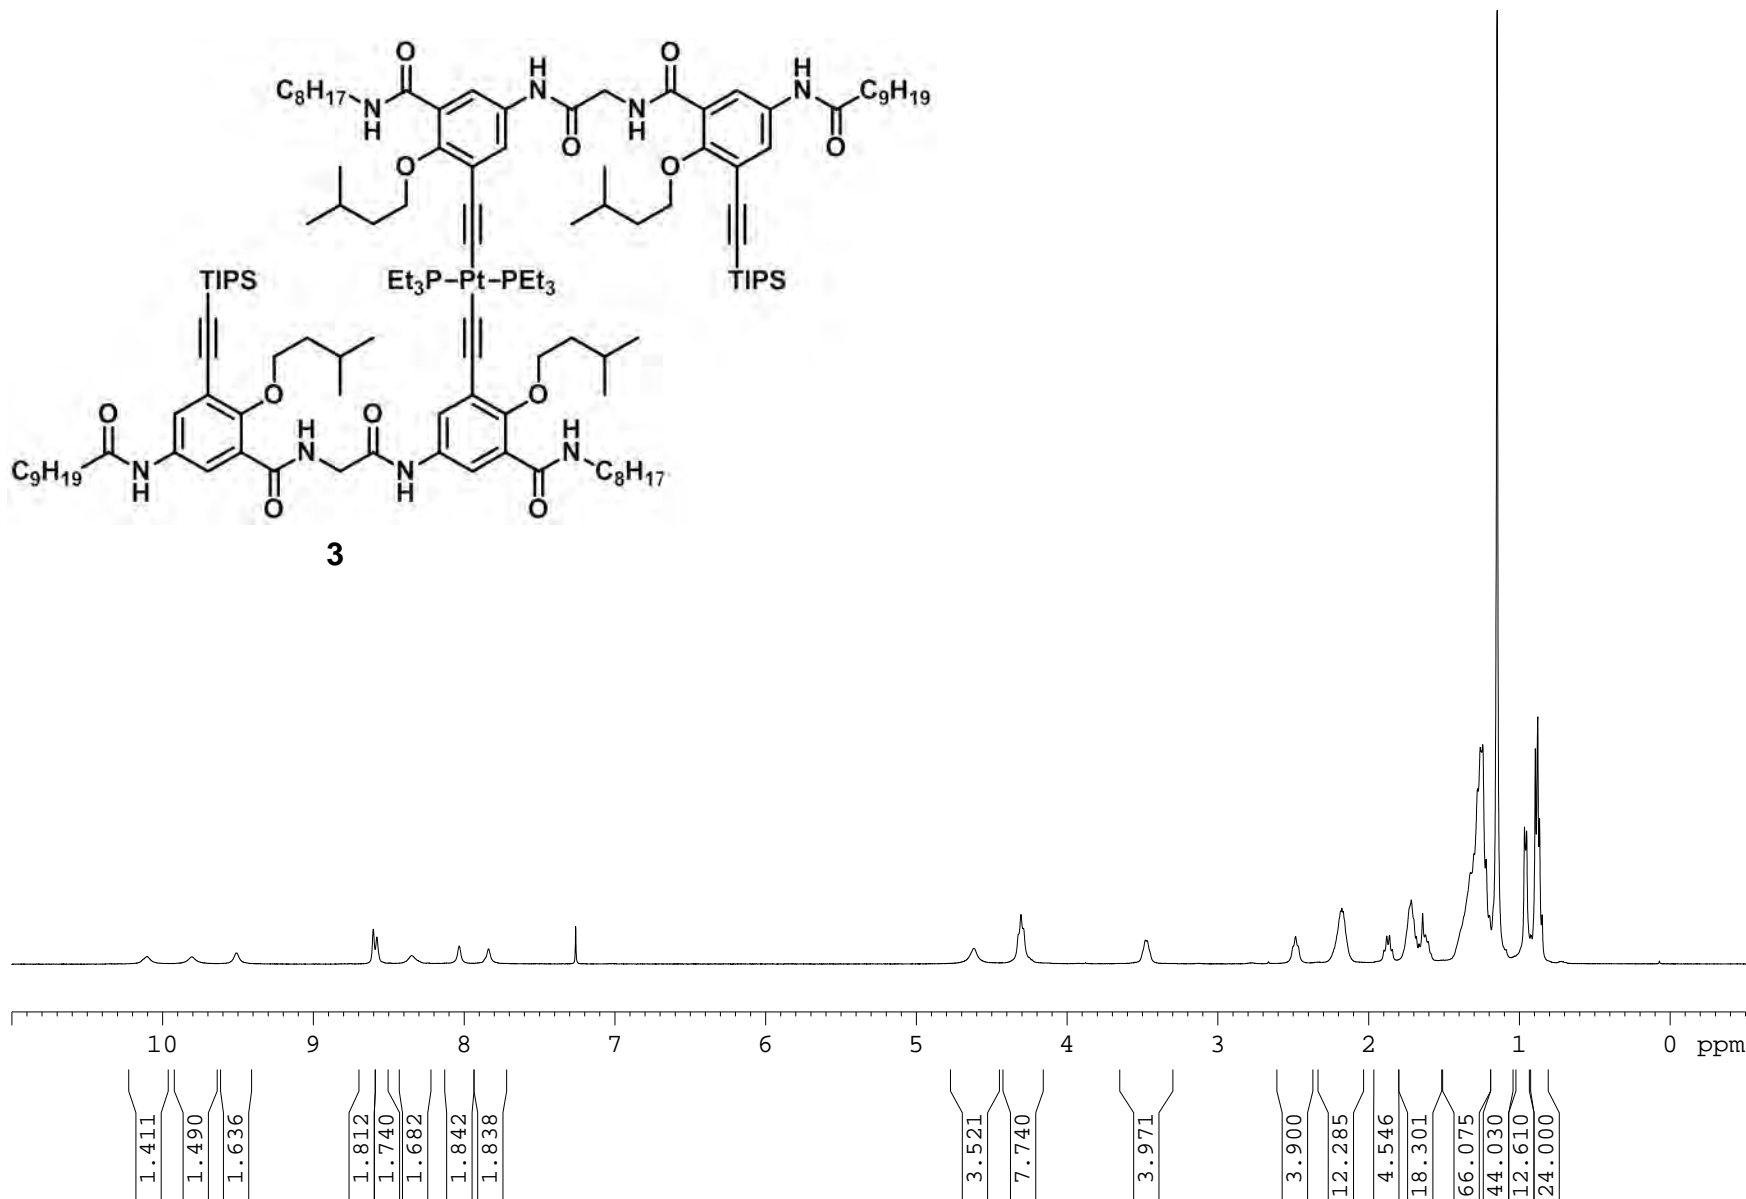

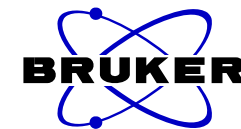

```

NAME      Sun-12032014-(TIPS,Pt)-C9-C812
EXPRO     3
PROCNO    20130906
Date_     20.44
Time      08:00
INSTRUM   spect
PROBHD    5 mm PABBO BB-
PULPROG   zgpg30
TD         65536
SOLVENT   CDCl3
NS         1664
DS         4
SWH        24038.461 Hz
FIDRES     0.366798 Hz
AQ         1.3631988 sec
RG         287
DW         20.800 usec
DE         6.50 usec
TE         297.4 K
D1         2.0000000 sec
D11        0.0300000 sec
TDO        1
===== CHANNEL f1 =====
NUC1       13C
P1         9.90 usec
PL1        -2.00 dB
PL1W       55.33689499 W
SFO1       100.6279183 MHz
===== CHANNEL f2 =====
CFOPRG2    waltz16
NUC2       1H
PCPD2      90.00 usec
PL2        -1.00 dB
PL12       15.16 dB
PL13       18.62 dB
PL2W       13.56617069 W
PL12W      0.32844096 W
PL13W      0.14806564 W
SFO2       400.1916008 MHz
SI         32768
SF         100.6278512 MHz
WDW        EM
SSB        0
LB         1.00 Hz
GB         0
PC         1.40
  
```

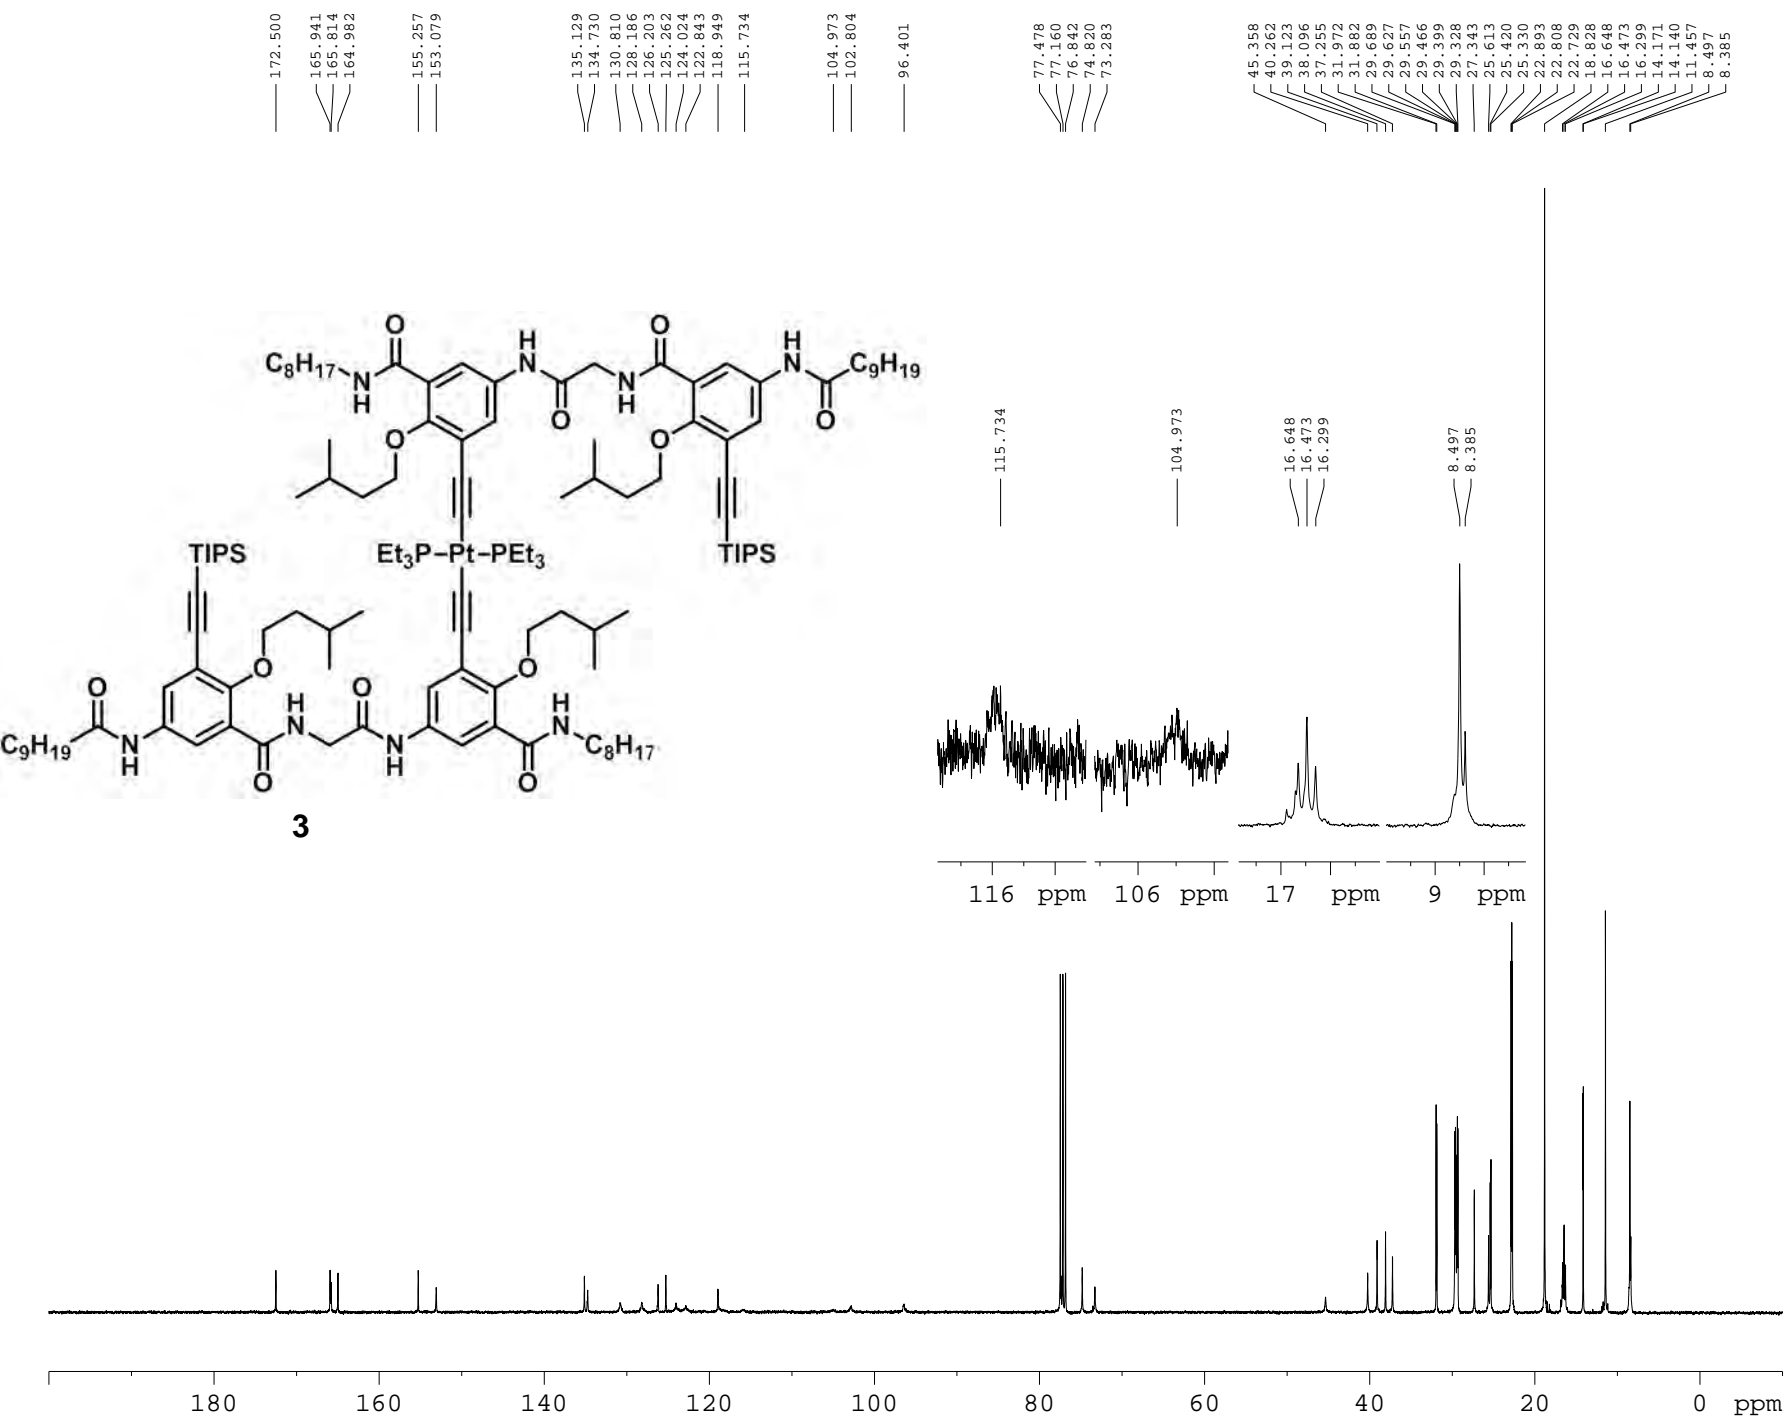

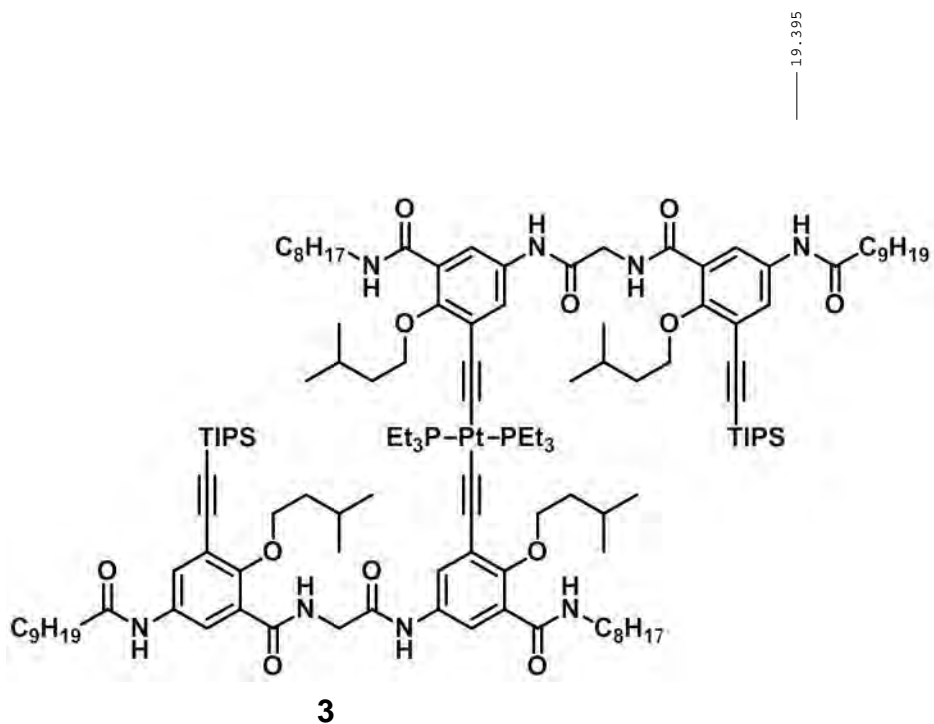

3

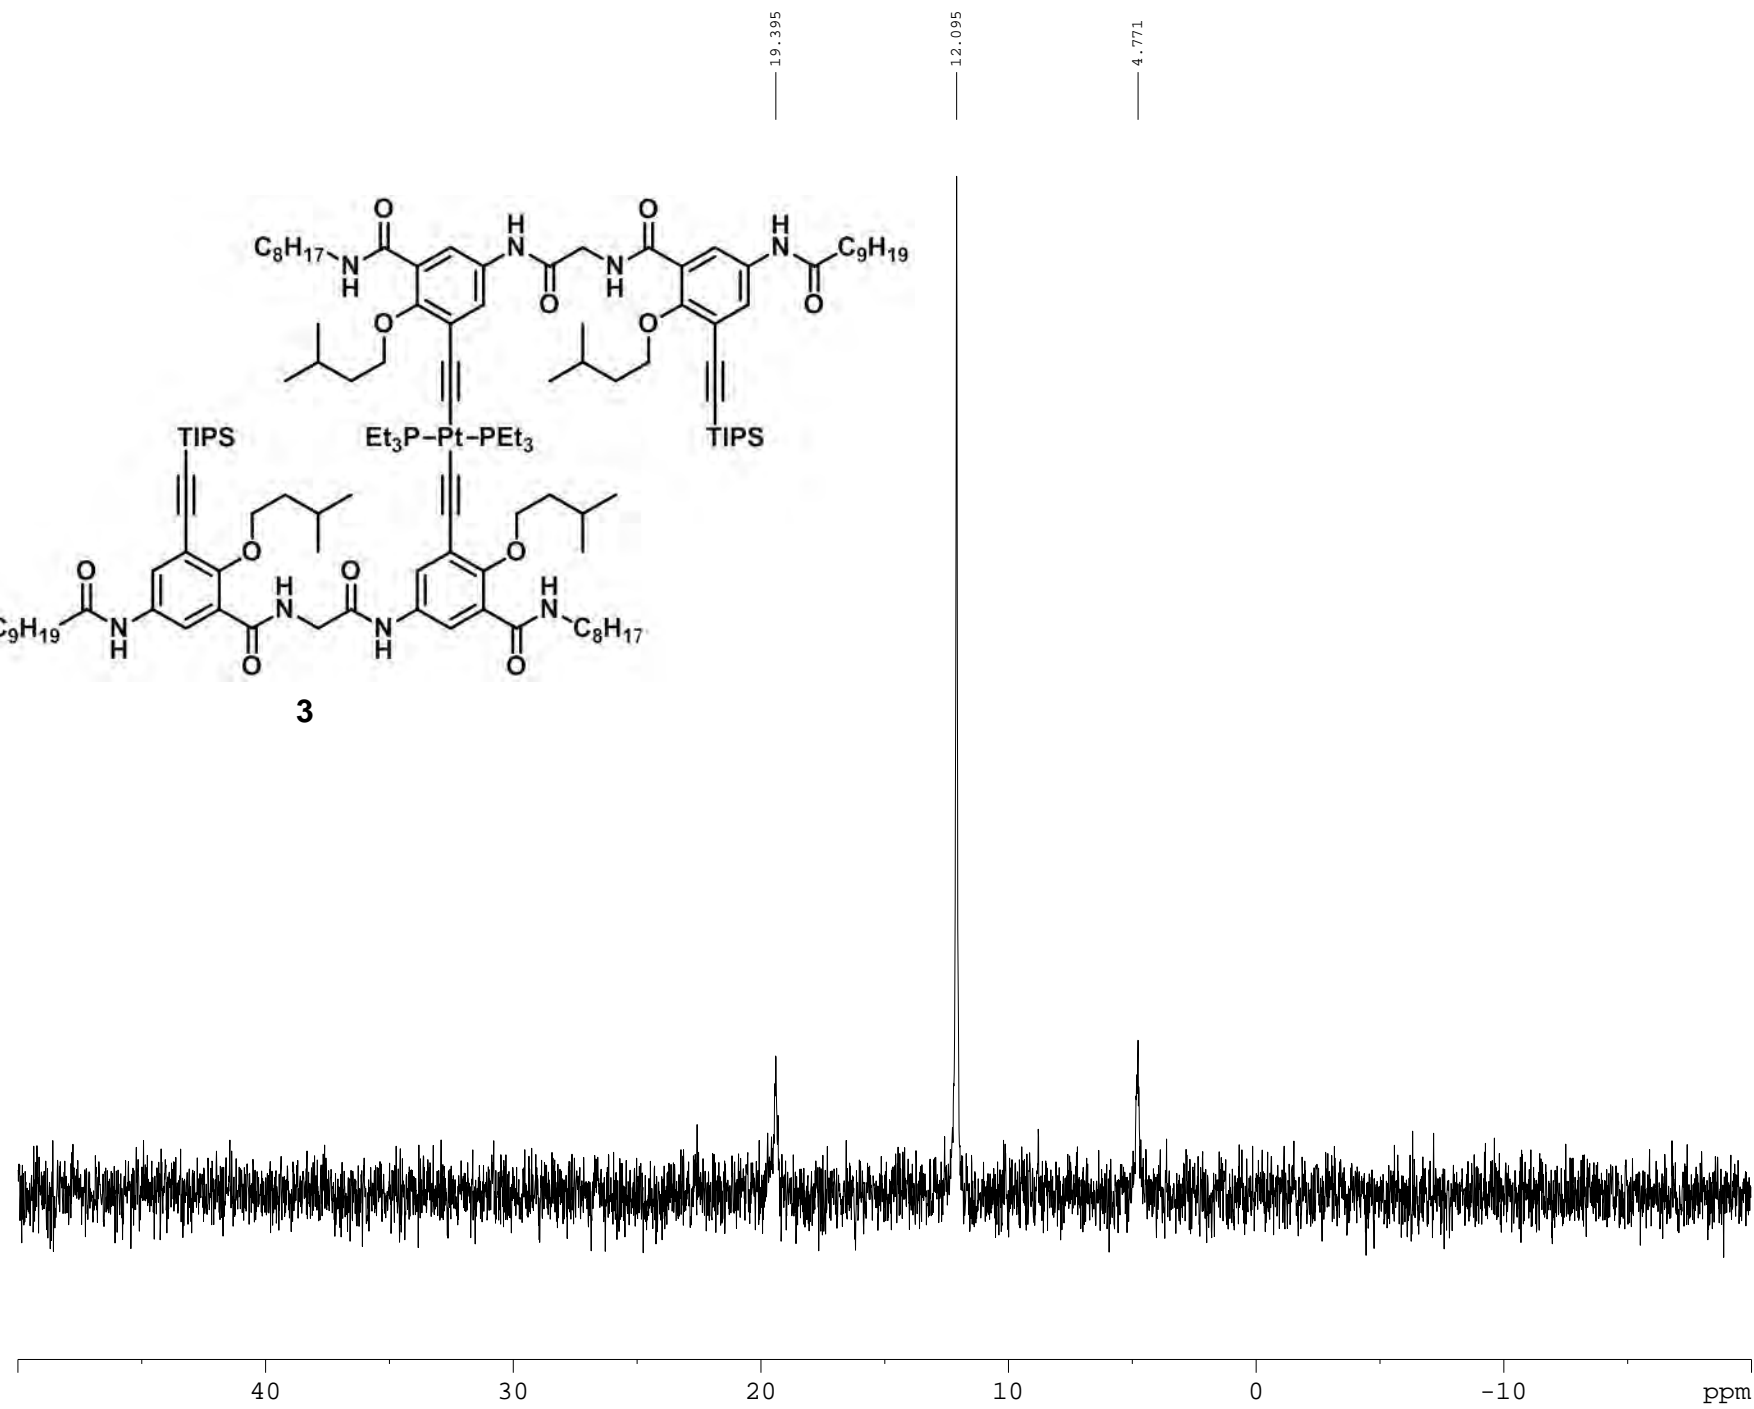

```
Sun-12032014-(TIPS,Pt)-C9-C8)2
NAME
EXPRO 2
PROCNO 20140701
Date_ 14.32
Time 14.32
INSTRUM spect
PROBHD 5 mm PABBO BB-
PULPROG zgpg30
TD 65536
SOLVENT CDCl3
NS 70
DS 4
SWH 64102.563 Hz
FIDRES 0.578127 Hz
AQ 0.5112308 sec
RG 2050
DW 7.500 usec
DE 6.50 usec
TE 296.8 K
D1 2.0000000 sec
D11 0.0300000 sec
TD0 1
===== CHANNEL f1 =====
NUC1 31P
P1 14.70 usec
PL1 4.00 dB
PL1W 10.30000019 W
SFO1 161.9917814 MHz
===== CHANNEL f2 =====
CPDPRG2 waltz16
NUC2 1H
PCPD2 90.00 usec
PL2 -1.00 dB
PL12 15.16 dB
PL2W 13.56637069 W
PL12W 0.32844096 W
SFO2 400.1916008 MHz
SI 32768
SF 161.9998899 MHz
WDW EM
SSB 0
LB 1.00 Hz
GB 0
PC 1.40
```

hfc2063\_140120154458 #1-20 RT: 0.15-1.85 AV: 20 SM: 5G NL: 7.43E4  
T: + p ESI Full ms [ 99.50-3000.50]

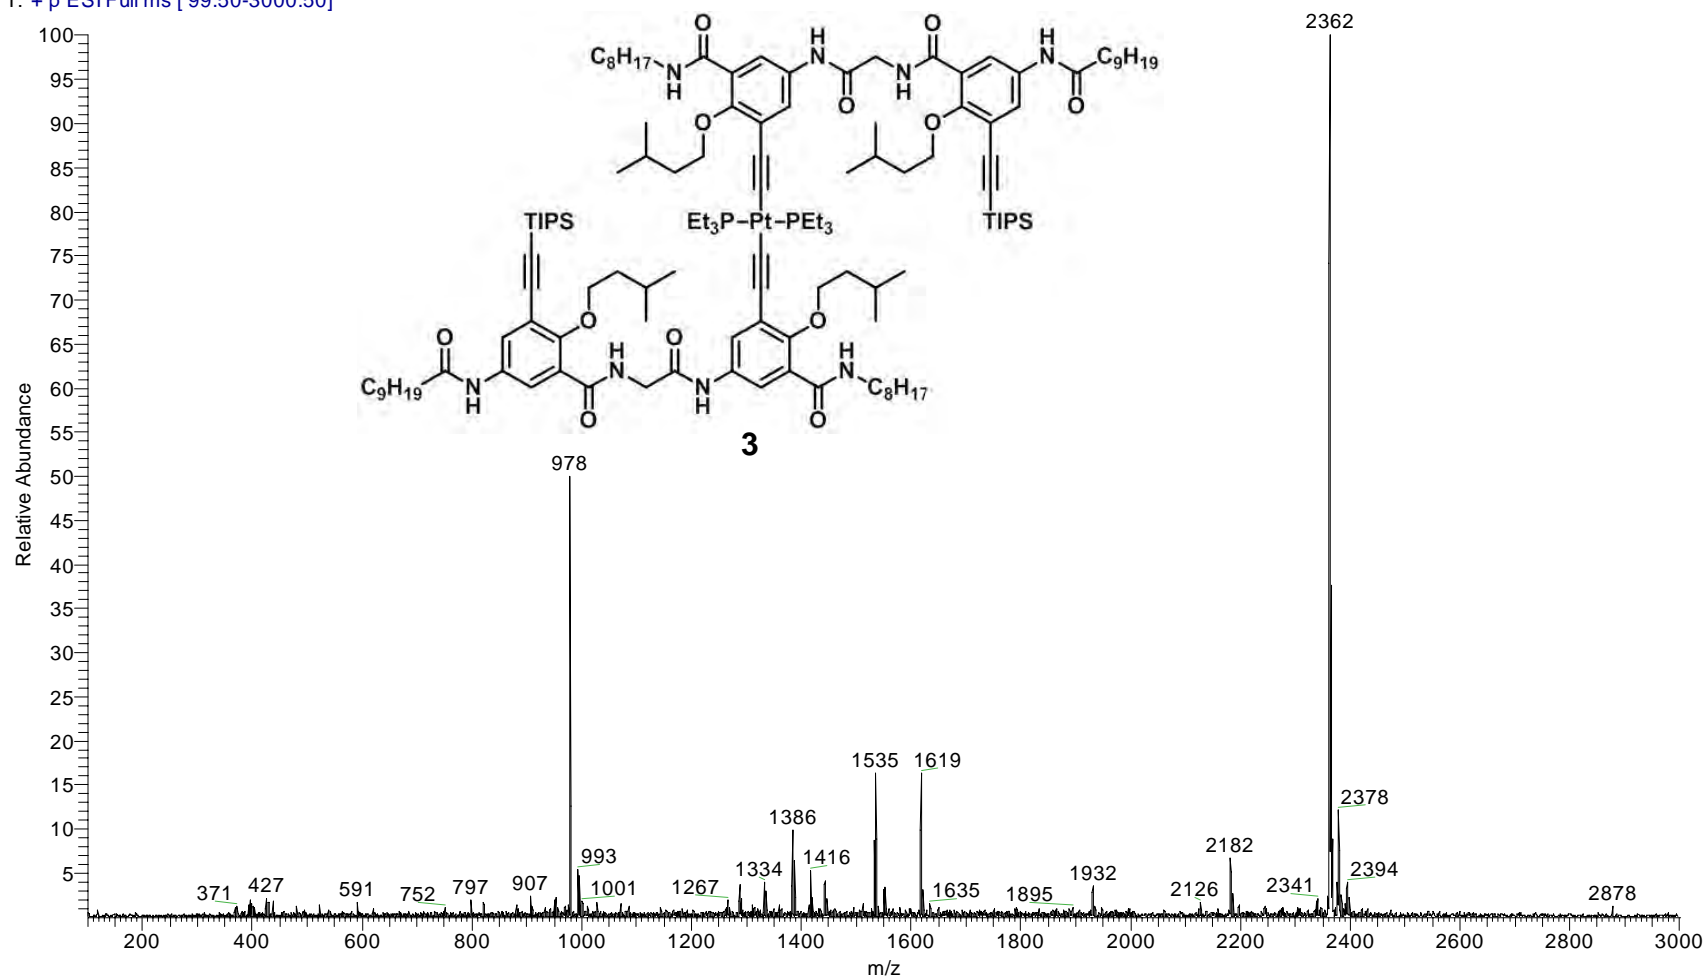

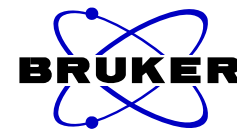

```
NAME Sun-22052013-(CCH,Pt)-(C9-C8)2
EXPNO 1
PROCNO 1
Date_ 20130522
Time 22.41
INSTRUM spect
PROBHD 5 mm PABBO BB-
PULPROG zg30
TD 32768
SOLVENT CDCl3
NS 32
DS 2
SWH 8223.685 Hz
FIDRES 0.250967 Hz
AQ 1.5921444 sec
RG 22.6
DW 60.800 usec
DE 6.50 usec
TE 295.9 K
D1 1.00000000 sec
TDO 1
***** CHANNEL f1 *****
NUC1 1H
P1 14.00 usec
PL -1.00 dB
PLW 13.56617069 W
SFO1 400.1924713 MHz
SI 32768
SF 400.1900150 MHz
WDW EM
SSB 0
LB 0.30 Hz
GB 0
PC 1.00
```

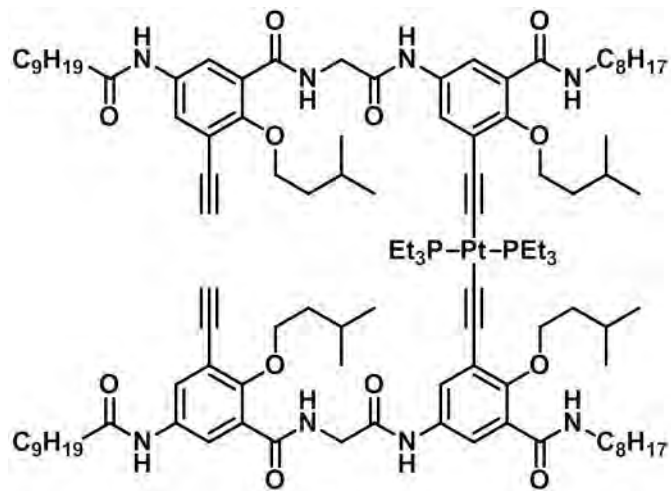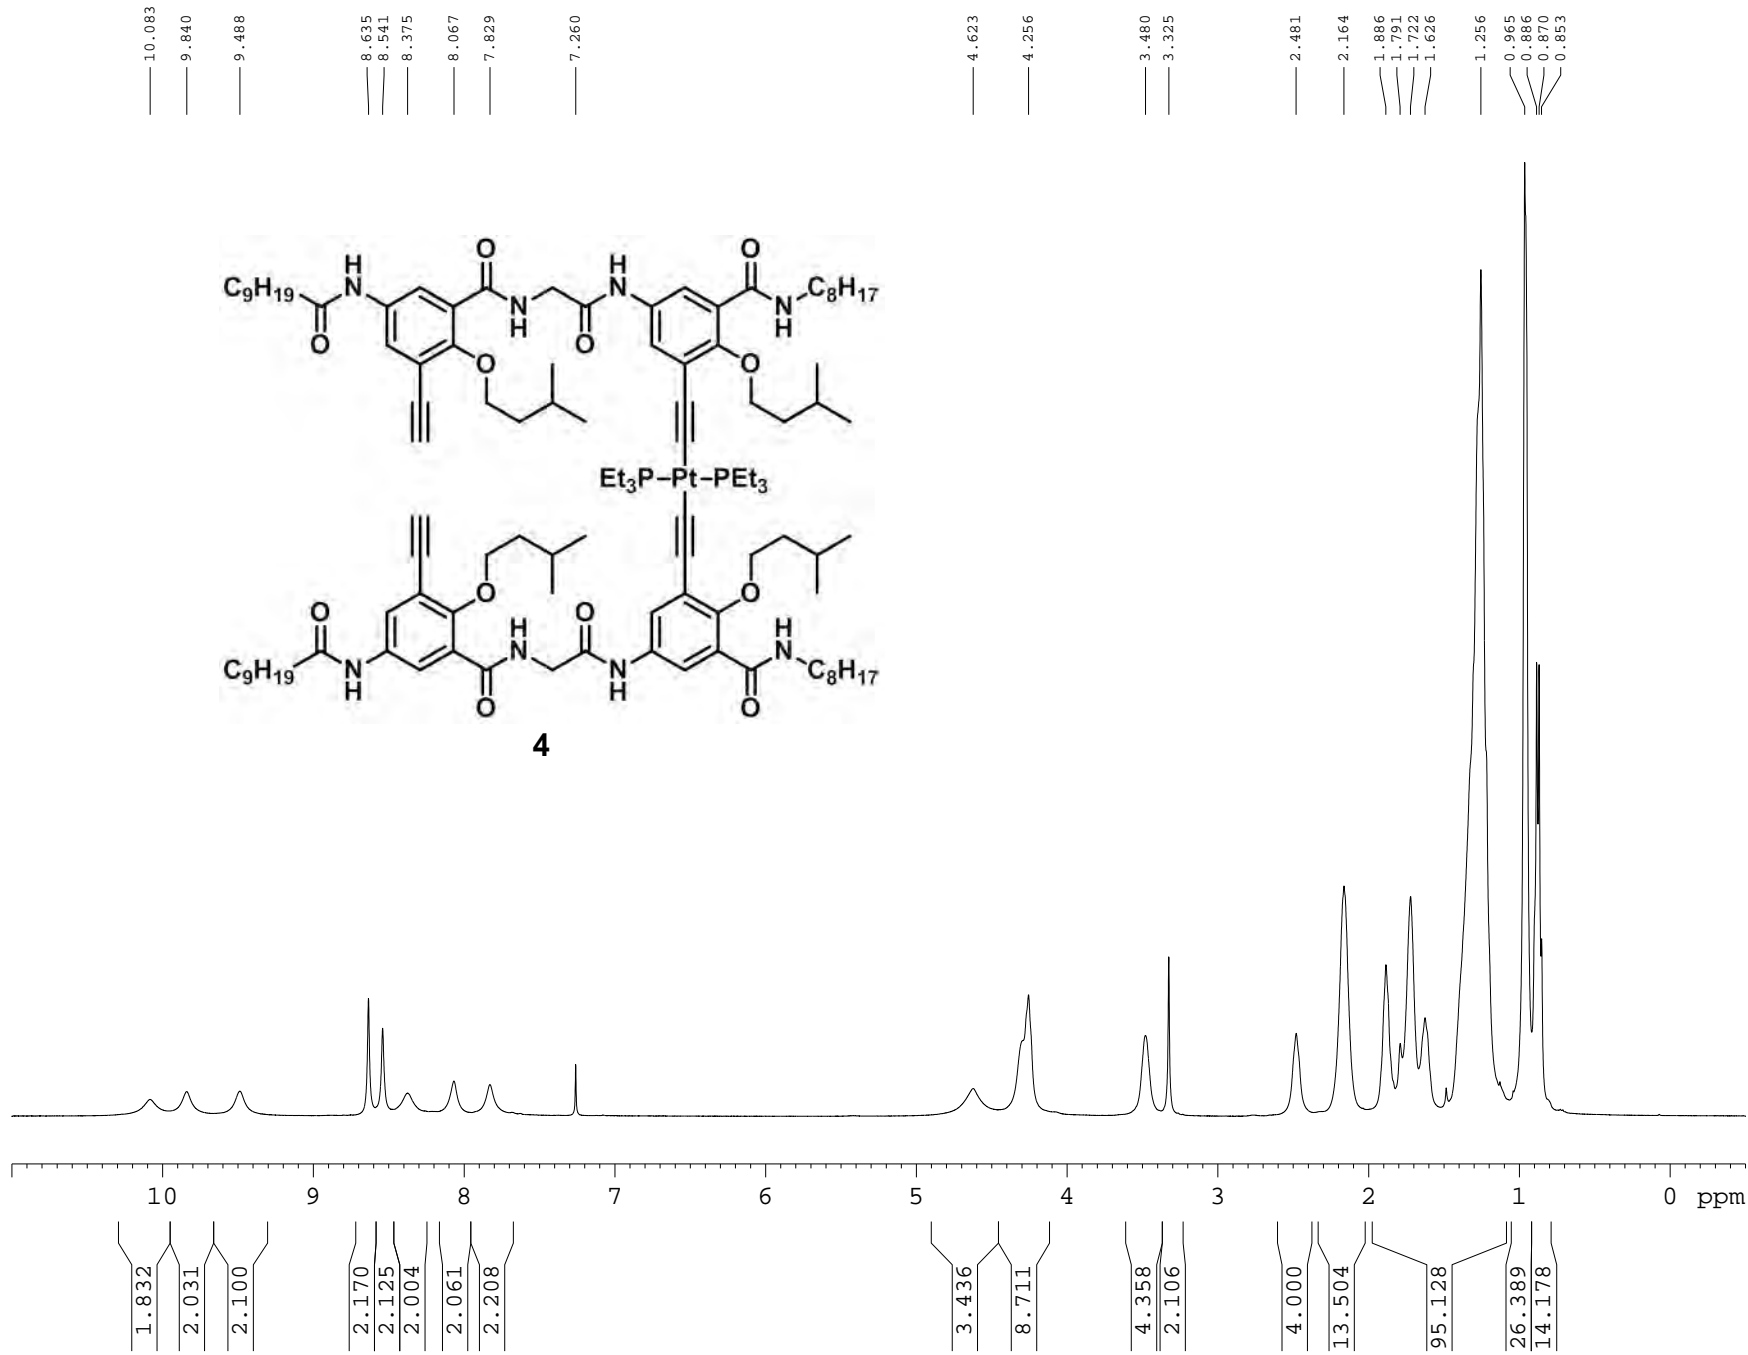

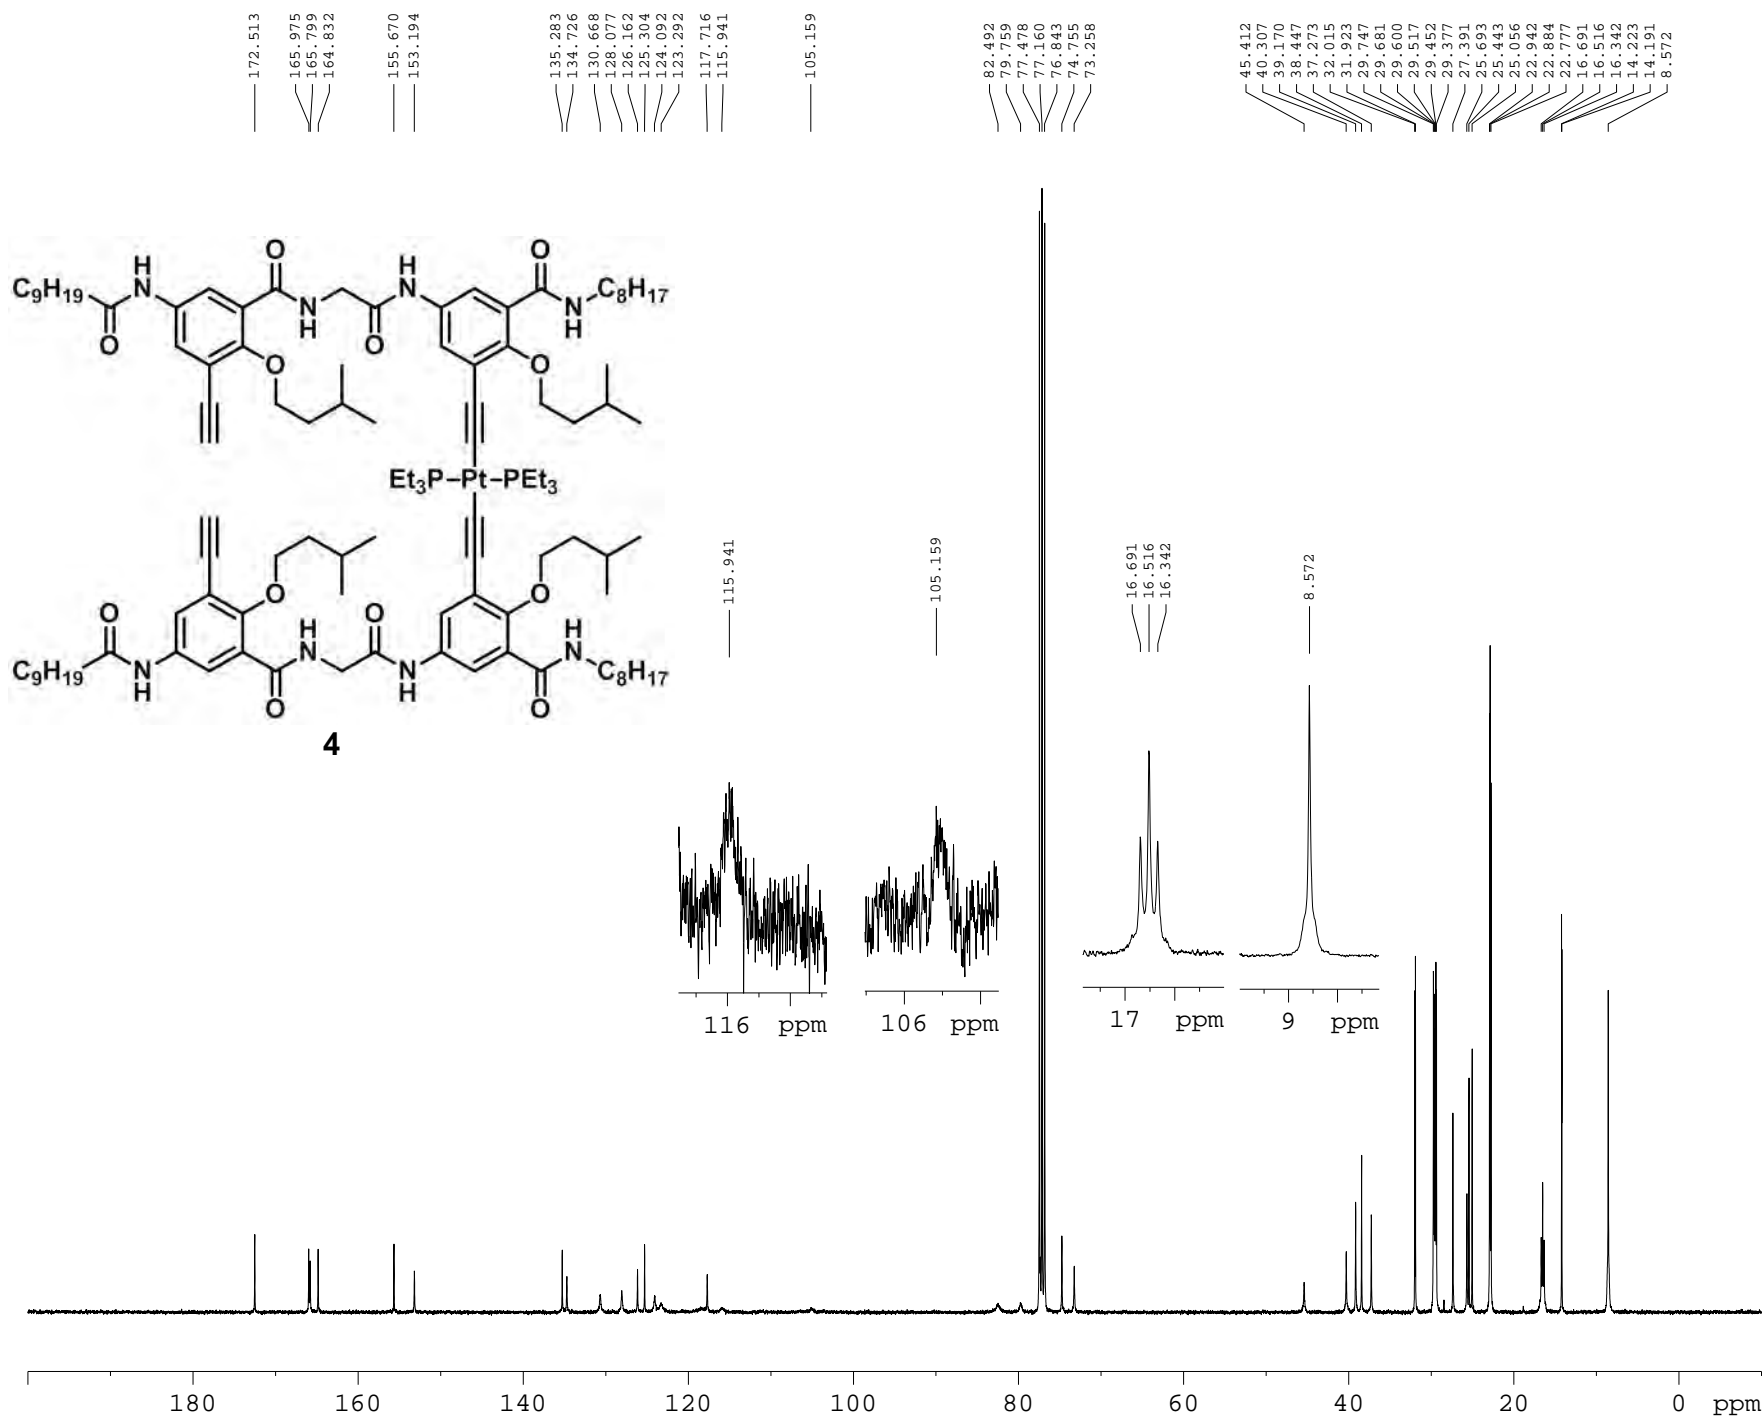

```

NAME Sun-22052013-(CCH,Pt)-C9-C8)2
EXPNO 6
PROCNO 1
Date_ 20130522
Time 23.47
INSTRUM spect
PROBHD 5 mm PABBO BB-
PULPROG zgpg30
TD 65536
SOLVENT CDCl3
NS 9277
DS 4
SWH 24038.461 Hz
FIDRES 0.366798 Hz
AQ 1.363388 sec
RG 203
DW 20.800 usec
DE 6.50 usec
TE 296.3 K
D1 2.0000000 sec
D11 0.0300000 sec
TDO 1
===== CHANNEL f1 =====
NUC1 13C
P1 9.90 usec
PL1 -2.00 dB
PL1W 55.33689499 W
SFO1 100.6279183 MHz
===== CHANNEL f2 =====
CPDPRG2 waltz16
NUC2 1H
PCPD2 90.00 usec
PL2 -1.00 dB
PL12 15.16 dB
PL13 18.62 dB
PL2W 13.56617059 W
PL1W 0.32841096 W
PL13W 0.14806664 W
SFO2 400.1516008 MHz
SI 32768
SF 100.6278472 MHz
WDW EM
SSB 0
LB 1.00 Hz
GB 0
PC 1.40

```

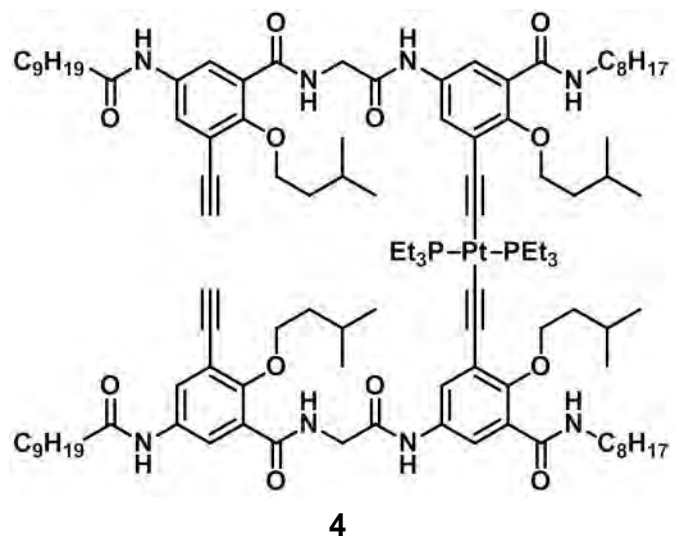

19.487

12.187

4.862

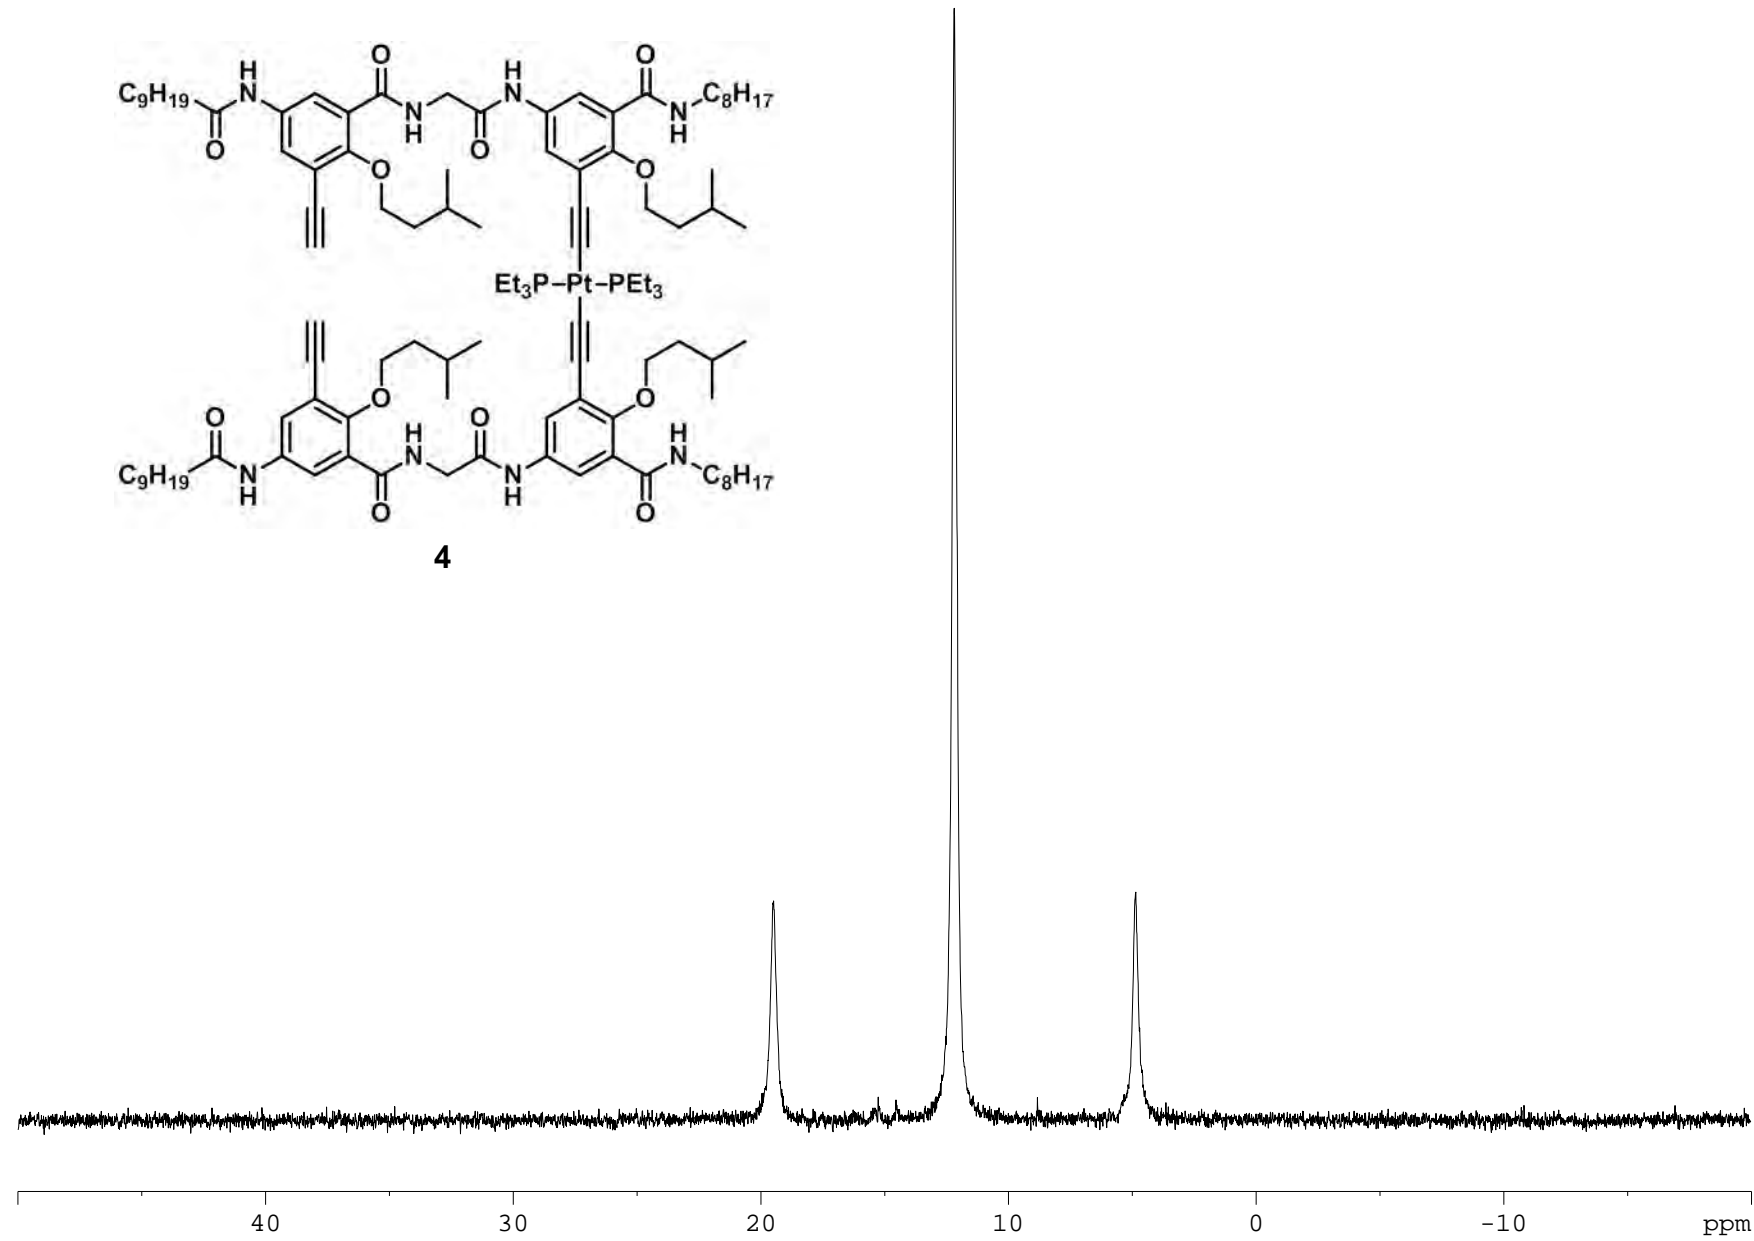

```
NAME Sun-22052013-(CCH,Pt)-C9-C8)2
EXPNO 2
PROCNO 1
Date_ 20130522
Time 22.46
INSTRUM spect
PROBHD 5 mm PABBO BB-
PULPROG zgpg30
TD 65536
SOLVENT CDCl3
NS 102
DS 4
SWH 64102.563 Hz
FIDRES 0.978127 Hz
AQ 0.5112308 sec
RG 2050
DW 7.800 usec
DE 6.50 usec
TE 296.6 K
D1 2.0000000 sec
D11 0.0300000 sec
TDO 1
===== CHANNEL f1 =====
NUC1 31P
P1 14.70 usec
PL1 4.00 dB
PL1W 10.30000019 W
SFO1 161.9917814 MHz
===== CHANNEL f2 =====
CPDPRG2 waltz16
NUC2 1H
PCPD2 90.00 usec
PL2 -1.00 dB
PL12 15.16 dB
PL2W 13.56617059 W
PL12W 0.32844096 W
SFO2 400.1315008 MHz
SI 32768
SF 161.9998999 MHz
WDW EM
SSB 0
LB 1.00 Hz
GB 0
PC 1.40
```

hfc1614\_130531165119 #1-2 RT: 0.15-0.24 AV: 2 NL: 2.10E4  
T: + p ESI Full ms [ 99.50-3000.50]

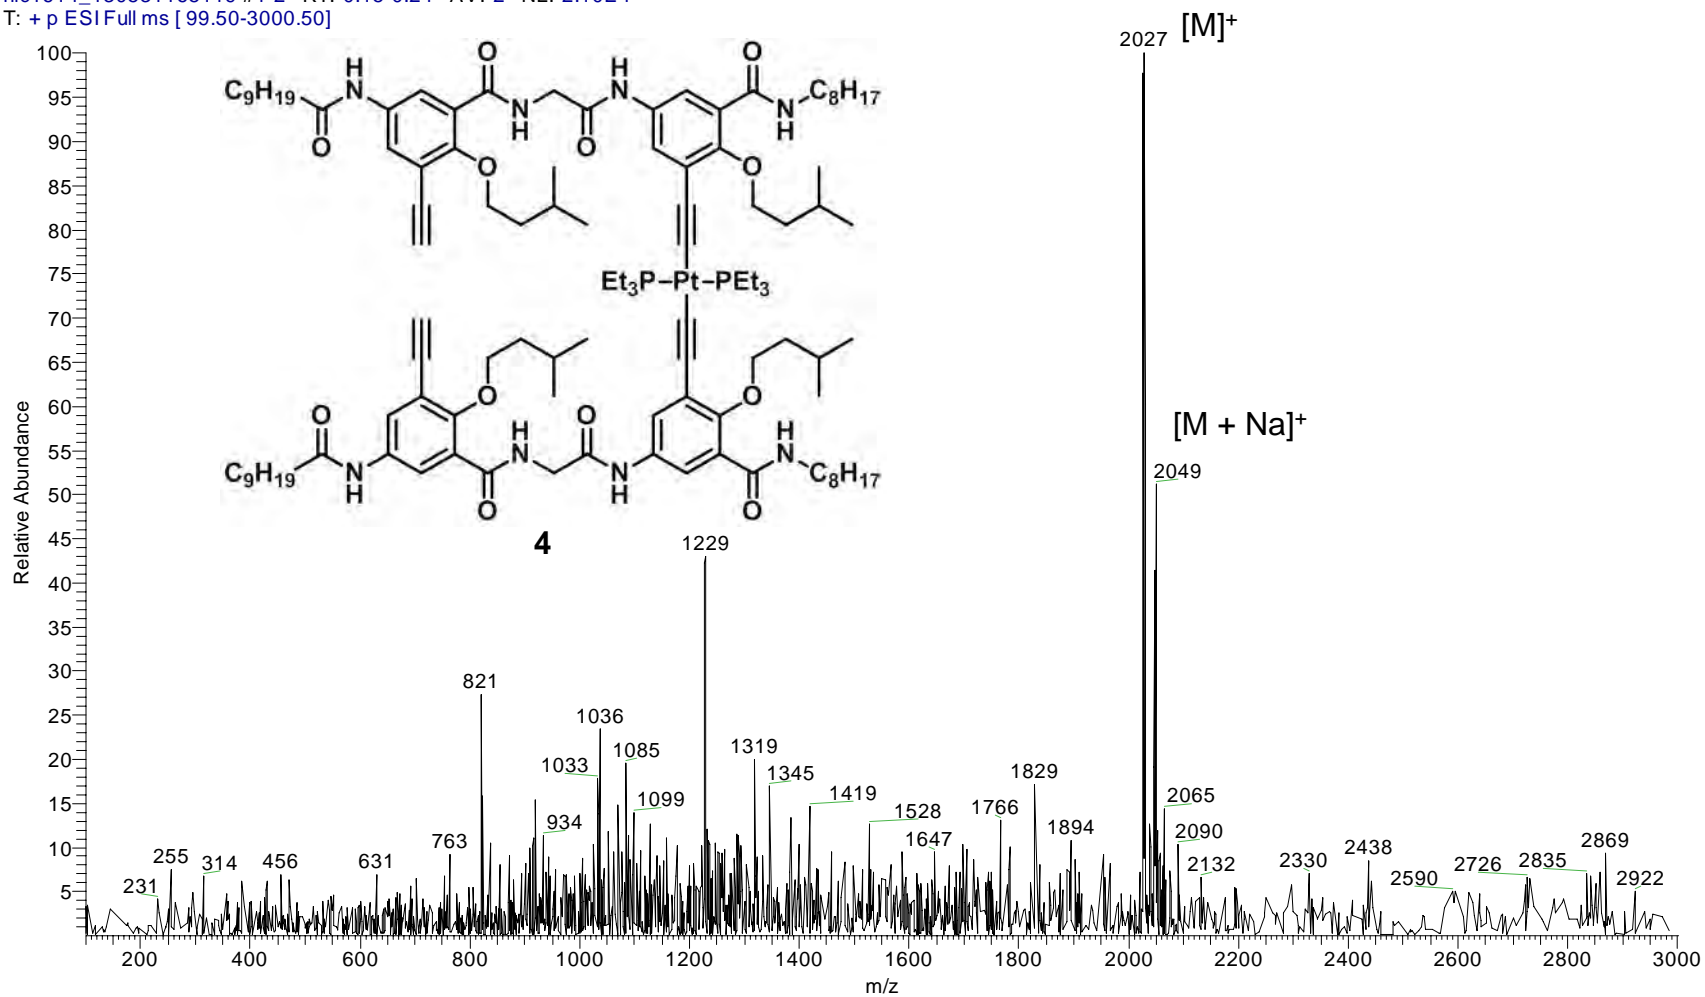



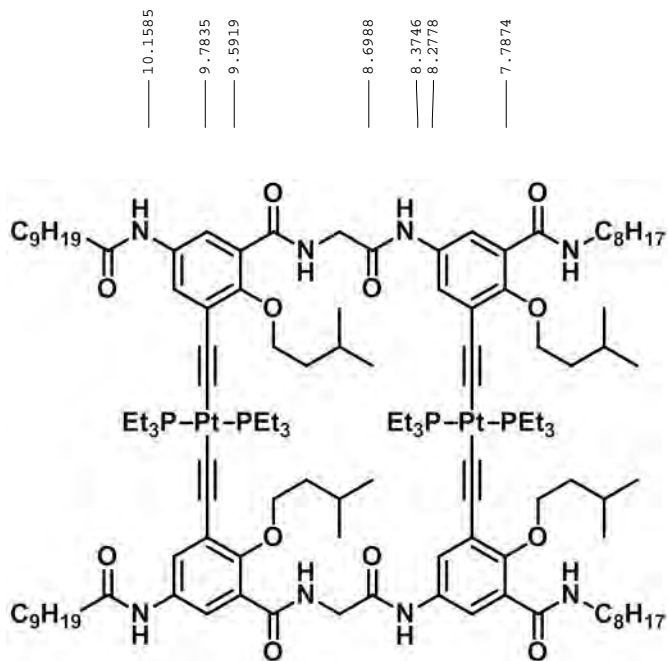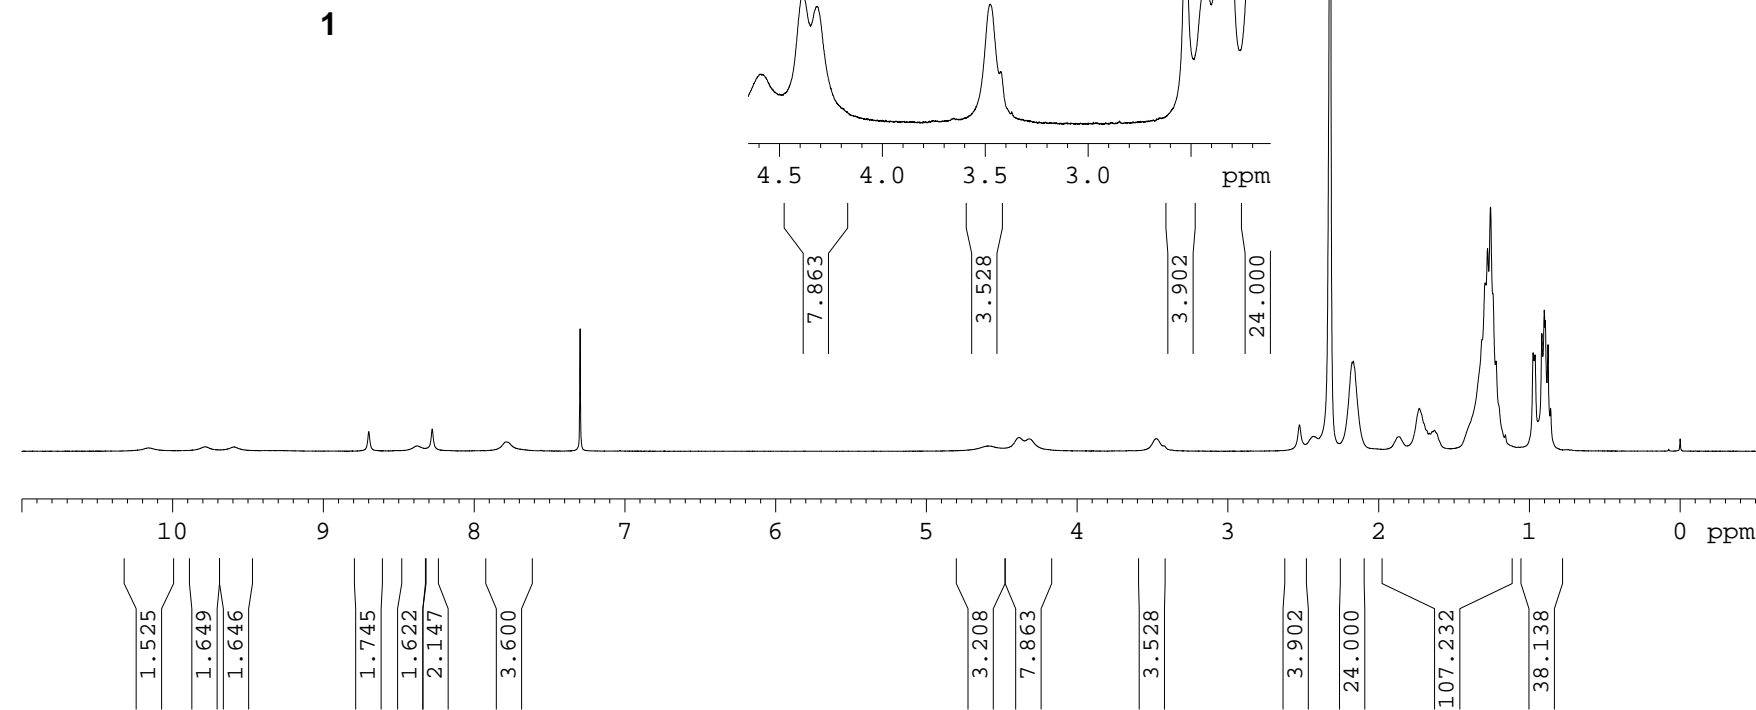

```

NAME Sun-24102013-(Pt,Pt)-C9-C6)2
EXPNO 3
PROCNO 1
Date_ 20131024
Time 23.27
INSTRUM spect
PROBHD 5 mm PABBO BB-
PULPROG zg30
TD 32768
SOLVENT CDCl3
NS 16
DS 2
SWH 8223.685 Hz
FIDRES 0.250967 Hz
AQ 1.9923444 sec
RG 57
DW 60.800 usec
DE 6.50 usec
TE 296.3 K
D1 1.0000000 sec
TDO 1

***** CHANNEL f1 *****
NUC1 1H
P1 14.00 usec
PL1 -1.00 dB
PLW 13.56617059 W
SFO1 400.1924713 MHz
SI 32768
SF 400.1899998 MHz
WDW EM
SSB 0
LB 0.30 Hz
GB 0
PC 1.00

```

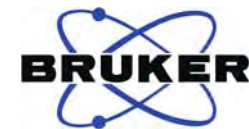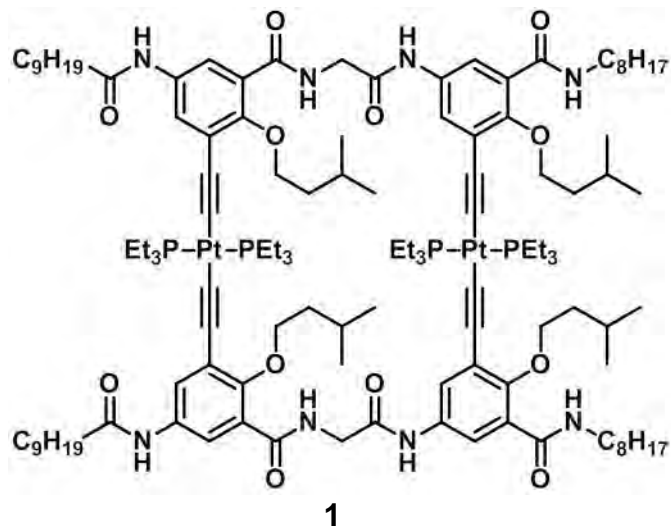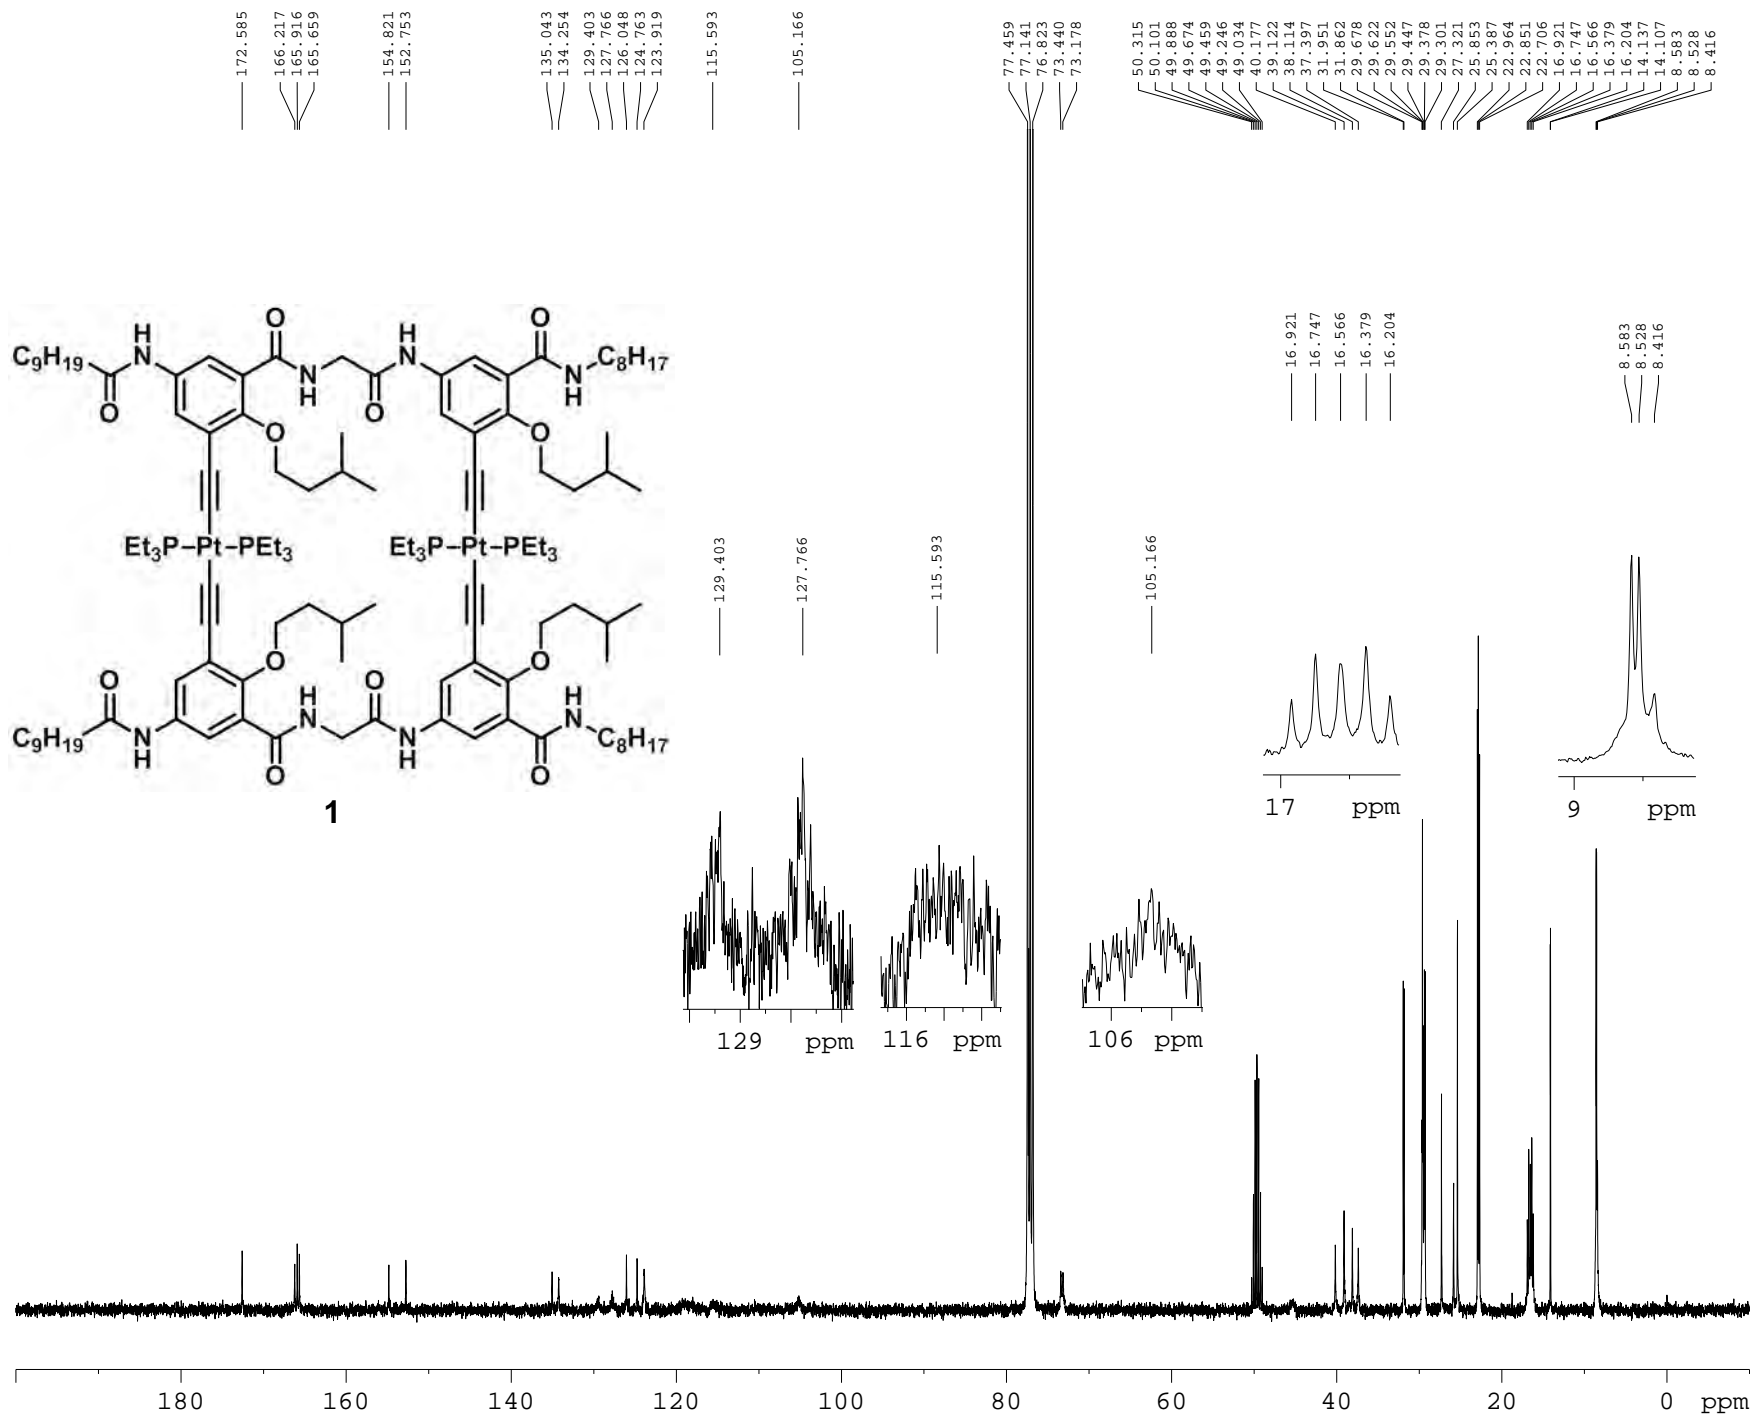

Current Data Parameters  
NAME Sun-24102013-(Pt,Pt)-C9-C8)2  
EXPNO 5  
PROCNO 1  
F2 - Acquisition Parameters  
Date\_ 20131025  
Time 9.15  
INSTRUM spect  
PROBHD 5 mm PABBO BB-  
PULPROG zgpg30  
TD 65536  
SOLVENT CDCl3  
NS 10138  
DS 4  
SWH 24038.461 Hz  
FIDRES 0.366798 Hz  
AQ 1.3631488 sec  
RG 203  
DW 20.800 usec  
DE 6.50 usec  
TE 296.4 K  
D1 2.00000000 sec  
D11 0.03000000 sec  
TDO 1  
===== CHANNEL f1 =====  
NUC1 13C  
P1 9.90 usec  
PL1 2.00 dB  
PLW 55.33689499 W  
SFO1 100.6279183 MHz  
===== CHANNEL f2 =====  
CPDPRG2 waltz16  
NUC2 1H  
PCPD2 90.00 usec  
PL2 -1.00 dB  
PL12 15.15 dB  
PL13 18.62 dB  
PL2W 13.56617069 W  
PL12W 0.3284096 W  
PL13W 0.14806664 W  
SFO2 400.1916008 MHz  
F2 - Processing parameters  
SI 32768  
SF 100.6279493 MHz  
WDW EM  
SSB 0  
LB 1.00 Hz  
GB 0  
PC 1.40

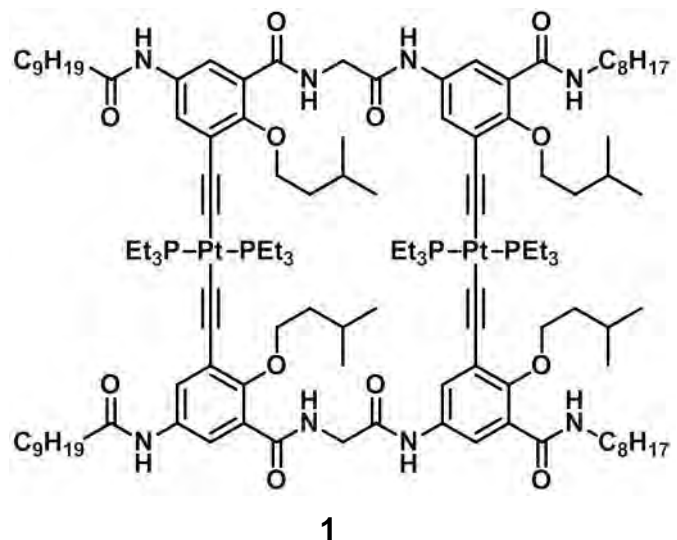

19.822  
19.171

12.503  
11.877

5.181  
4.583

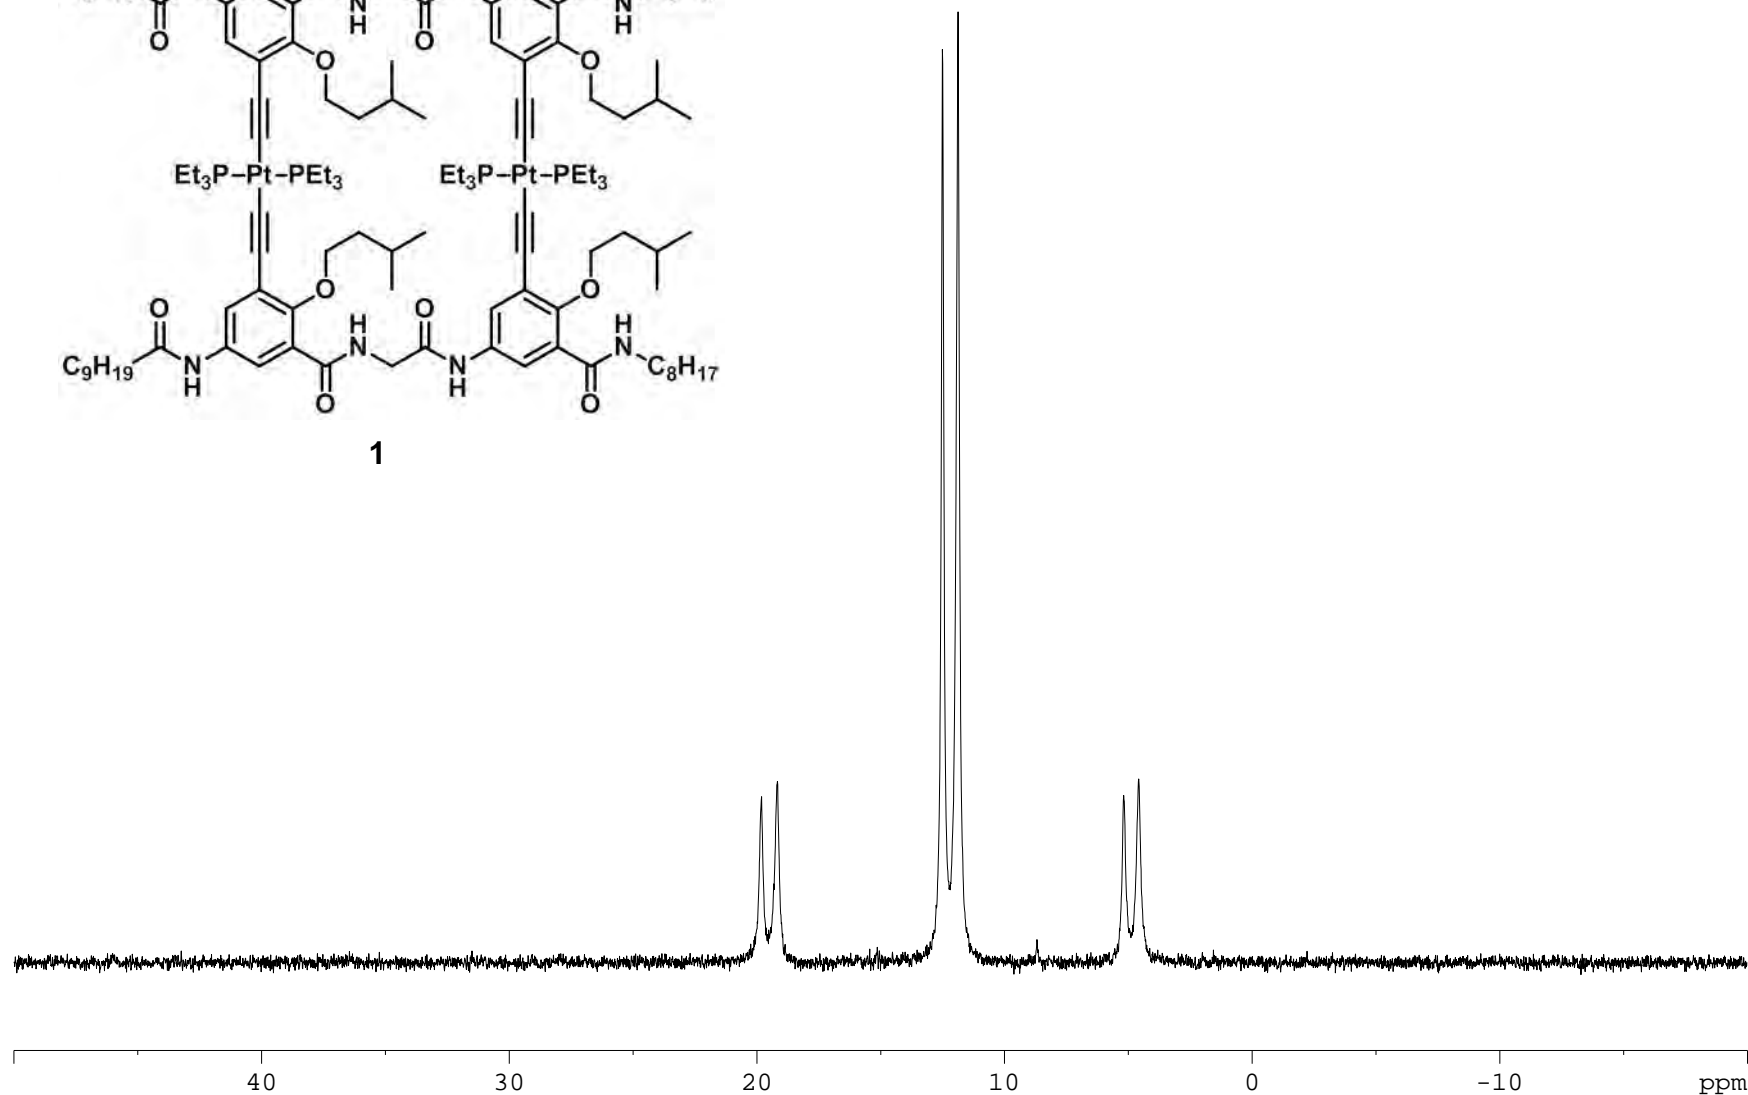

```
NAME Sun-24102013-[Pt,Pt]-C9-C8)2
EXPNO 4
PROCNO 1
Date_ 20131024
Time 23.30
INSTRUM spect
PROBHD 5 mm PABBO BB-
PULPROG zgpg30
TD 65536
SOLVENT CDCl3
NS 512
DS 4
SWH 64102.563 Hz
FIDRES 0.978127 Hz
AQ 0.5112308 sec
RG 2050
DW 7.800 usec
DE 6.50 usec
TE 296.8 K
D1 2.0000000 sec
D11 0.0300000 sec
TD0 1
===== CHANNEL f1 =====
NUC1 31P
P1 14.70 usec
PL1 4.00 dB
PLW 10.3000019 W
SFO1 161.9917814 MHz
===== CHANNEL f2 =====
PCPD2 waltr16
NUC2 1H
PCPD2 90.00 usec
PL2 -1.00 dB
PL12 15.16 dB
PL2W 13.56617069 W
PL1W 0.3384096 W
SFO2 400.1916008 MHz
SI 32768
SF 161.9998999 MHz
WDW EM
SSB 0
LB 1.00 Hz
GB 0
PC 1.40
```

ROESY spectrum of **1** in 2% CD<sub>3</sub>OH/CDCl<sub>3</sub> at 7 mM with water suppression



Sun-27082013-Pt2-CD MeOH 700  
NAME  
EXPNO 15  
PROCNO 1  
Date\_ 20130828  
Time 5.24  
INSTRUM spect  
PROBHD 5 mm CPTCI 1H-  
PULPROG roesyphpr  
TD 2048  
SOLVENT CDCl3  
NS 16  
DS 16  
SWH 14097.744 Hz  
FIDRES 6.883664 Hz  
AQ 0.0726857 sec  
RG 64  
DW 35.467 usec  
DE 10.00 usec  
TE 298.0 K  
D0 0.00002638 sec  
D1 2.00000000 sec  
D11 0.03000000 sec  
D12 0.00002000 sec  
D13 0.00000400 sec  
INO 0.00007100 sec

==== CHANNEL f1 =====  
SFO1 700.2120824 MHz  
NUC1 1H  
P1 8.04 usec  
P15 200000.00 usec  
ND0 1  
TD 256  
SFO1 700.2121 MHz  
FIDRES 55.017605 Hz  
SW 20.115 ppm  
FnMODE States-TPPI  
SI 2048  
SF 700.2100000 MHz  
WDW QSINE  
SSB 2  
LB 0.00 Hz  
GB 0  
PC 1.00  
SI 1024  
MC2 States-TPPI  
SF 700.2100000 MHz  
WDW QSINE  
SSB 2  
LB 0.00 Hz  
GB 0

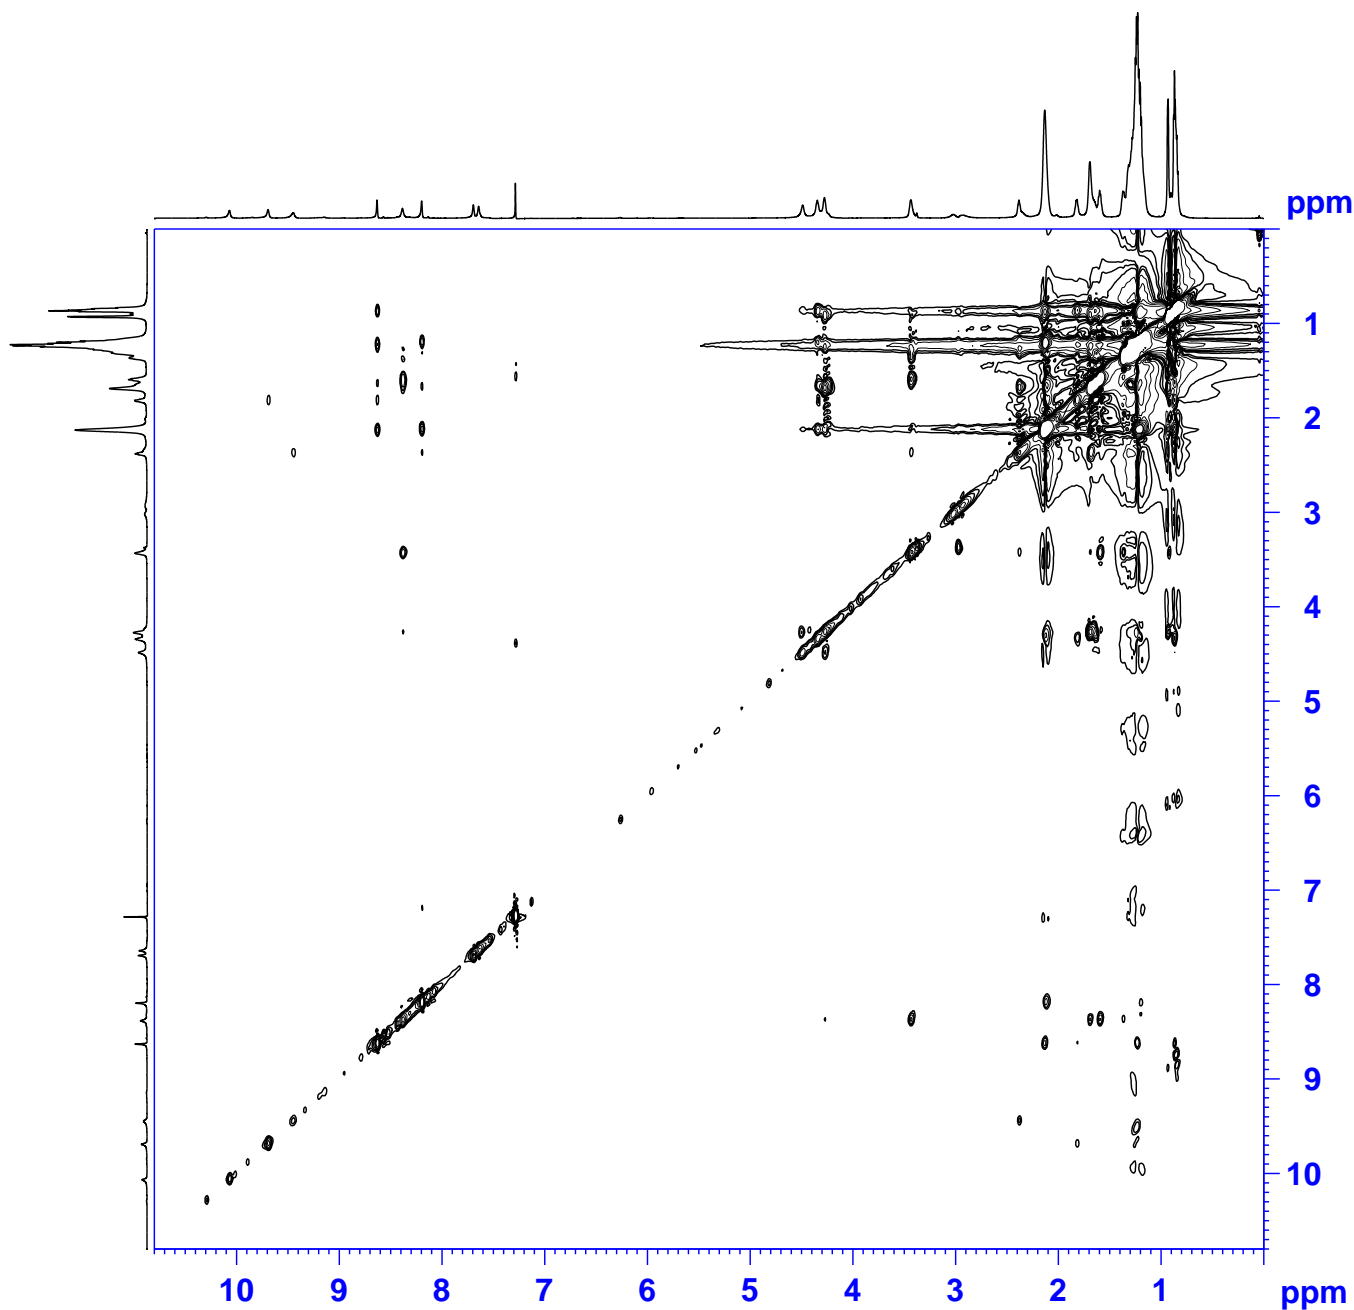

hfc2000\_130916163036 #1-39 RT: 0.13-3.25 AV: 39 SM: 5G NL: 2.85E4  
T: + p ESI Full ms [ 79.50-3000.50]

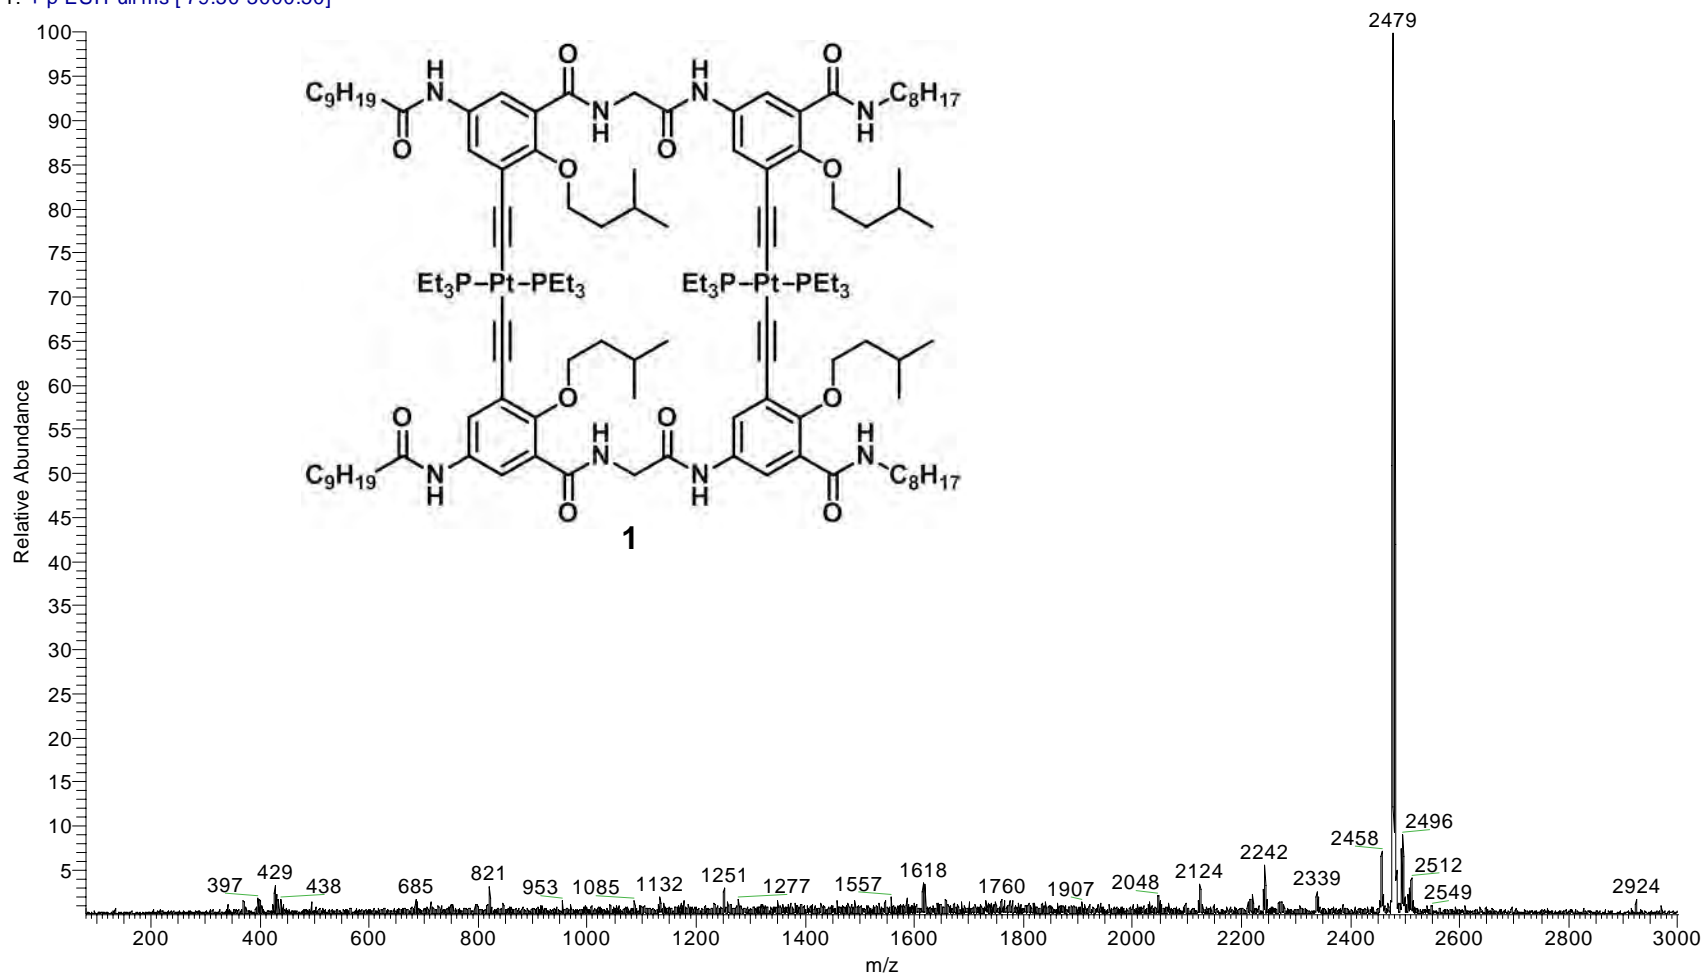

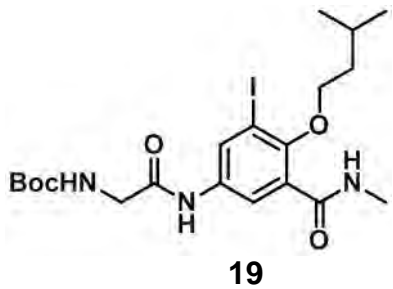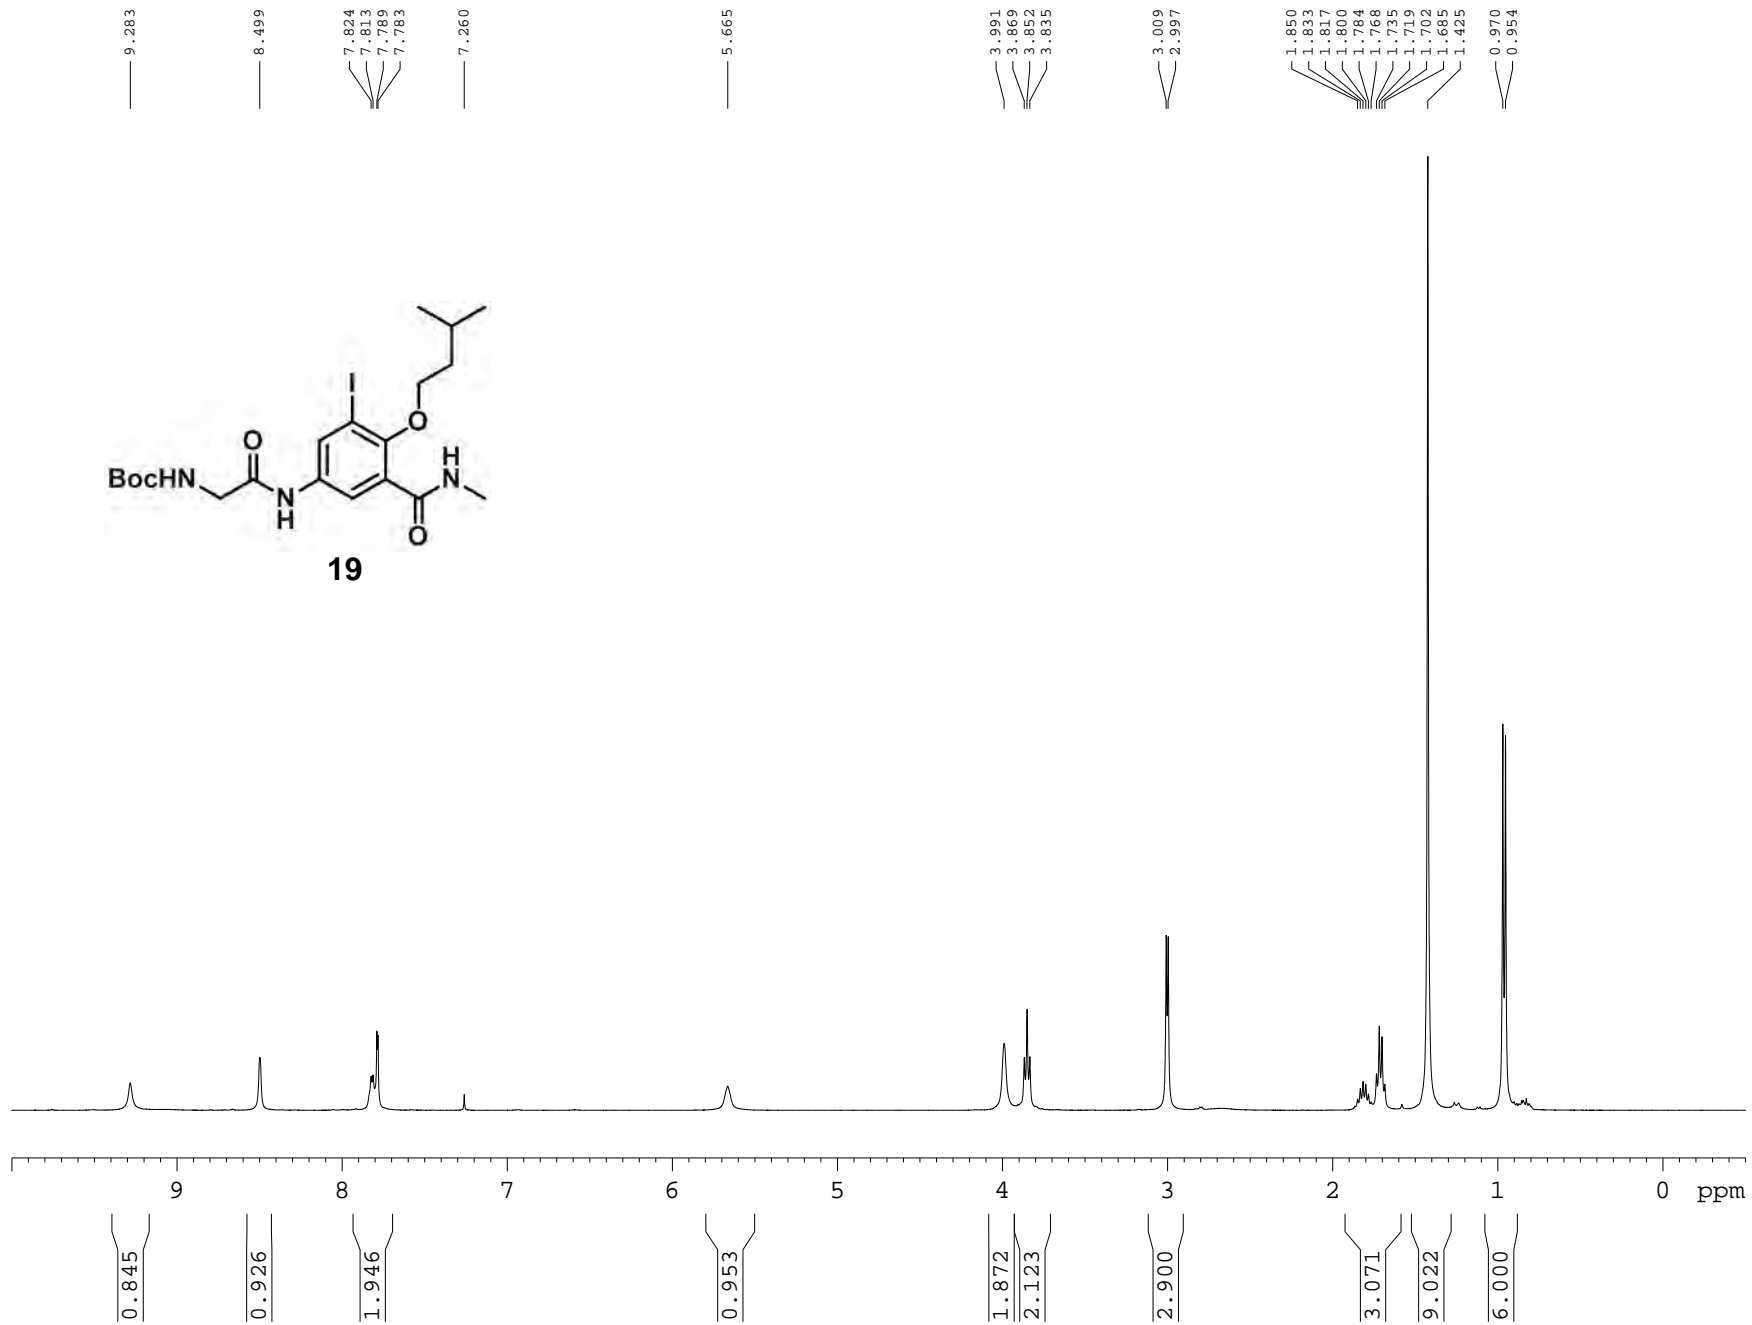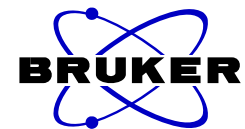

```

NAME      Sun-01052014-(I)-BOC-Cl
EXPNO     1
PROCNO    1
Date_     20140501
Time      16.34
INSTRUM   spect
PROBHD    5 mm PADUL 13C
PULPROG   zg30
TD         65536
SOLVENT   CDCl3
NS         16
DS         2
SWH       8223.695 Hz
FIDRES    0.125483 Hz
AQ        3.9846387 sec
RG         64
DW        60.800 usec
DE        6.50 usec
TE        294.3 K
D1        1.00000000 sec
TDO       1

===== CHANNEL f1 =====
NUC1      1H
P1        14.83 usec
PL1       0.00 dB
PL1W      8.31434441 W
SF01      400.1324710 MHz
SI        32768
SF        400.1300079 MHz
WDW       EM
SSB       0
LB        0.30 Hz
GB        0
PC        1.00
  
```

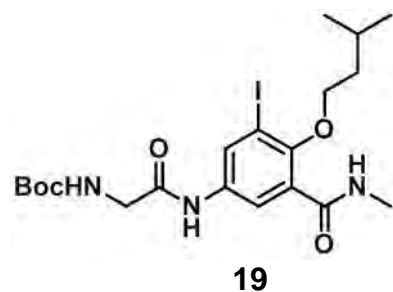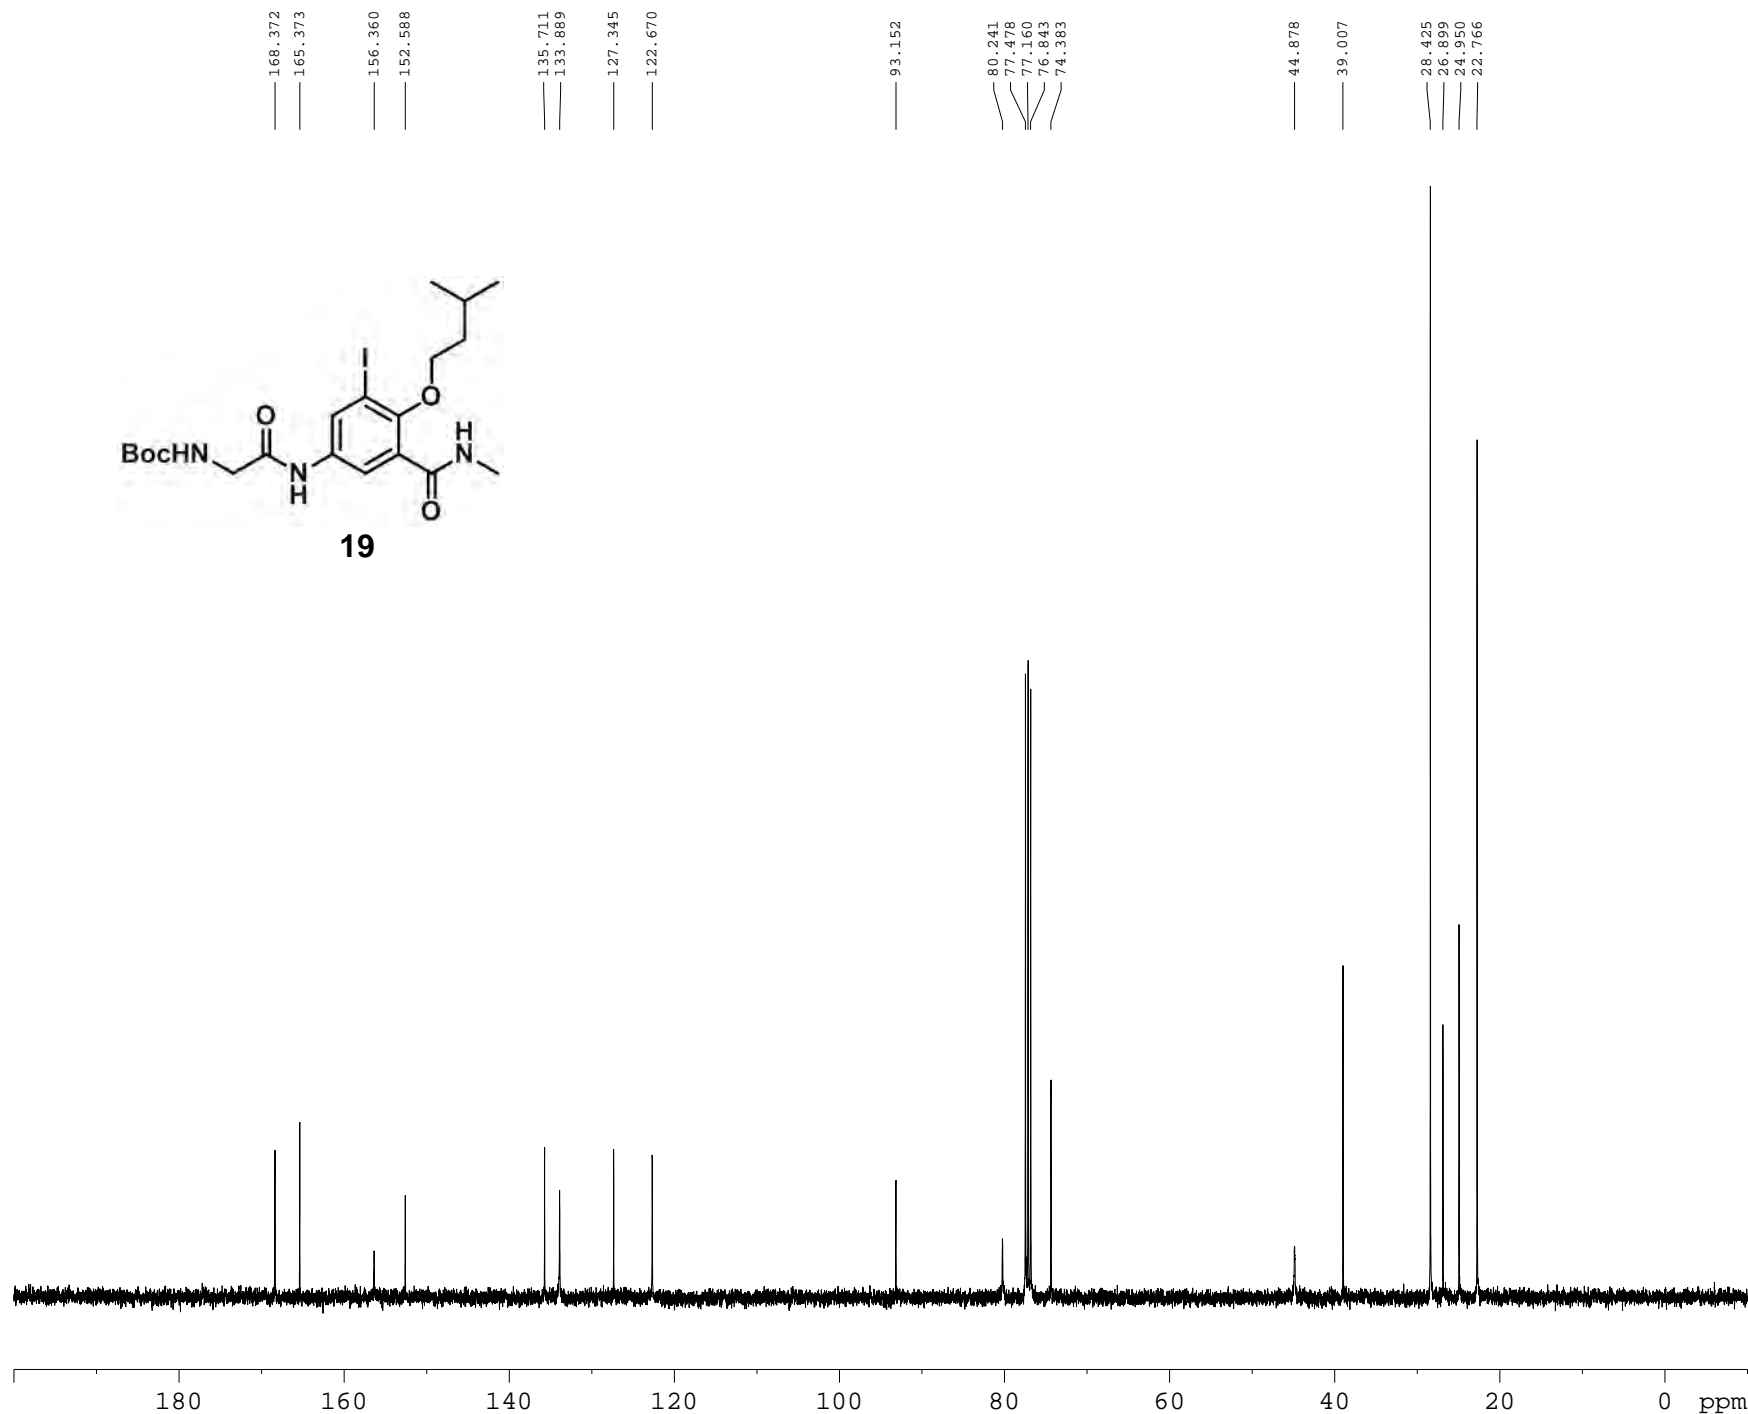

```
NAME Sun-01052014-(I)-BOC-C1
EXPNO 5
PROCNO 1
Date_ 20140501
Time 16.37
INSTRUM spect
PROBHD 5 mm PADUL 13C
PULPROG zgpg30
TD 65536
SOLVENT CDCl3
NS 181
DS 4
SWH 24038.461 Hz
FIDRES 0.366798 Hz
AQ 1.3631988 sec
RG 203
DW 20.800 usec
DE 6.50 usec
TE 294.5 K
D1 2.00000000 sec
D11 0.03000000 sec
TD0 1
```

```
***** CHANNEL f1 *****
NUC1 13C
P1 9.68 usec
PL1 -0.60 dB
PLW 41.24164963 W
SFO1 100.6228298 MHz
```

```
***** CHANNEL f2 *****
CPDPRG2 waltz16
NUC2 1H
PCPD2 90.00 usec
PL2 0.00 dB
PL12 15.66 dB
PL13 15.92 dB
PL2W 8.31434441 W
PL12W 0.22585411 W
PL13W 0.21272963 W
SFO2 400.1316005 MHz
SI 32768
SF 100.6127605 MHz
WDW EM
SSB 0
LB 1.00 Hz
GB 0
PC 1.40
```

hfc1994 #2-4 RT: 0.21-0.37 AV: 3 SM: 5G NL: 3.73E6  
T: + p ESI Full ms [ 79.50-800.50]

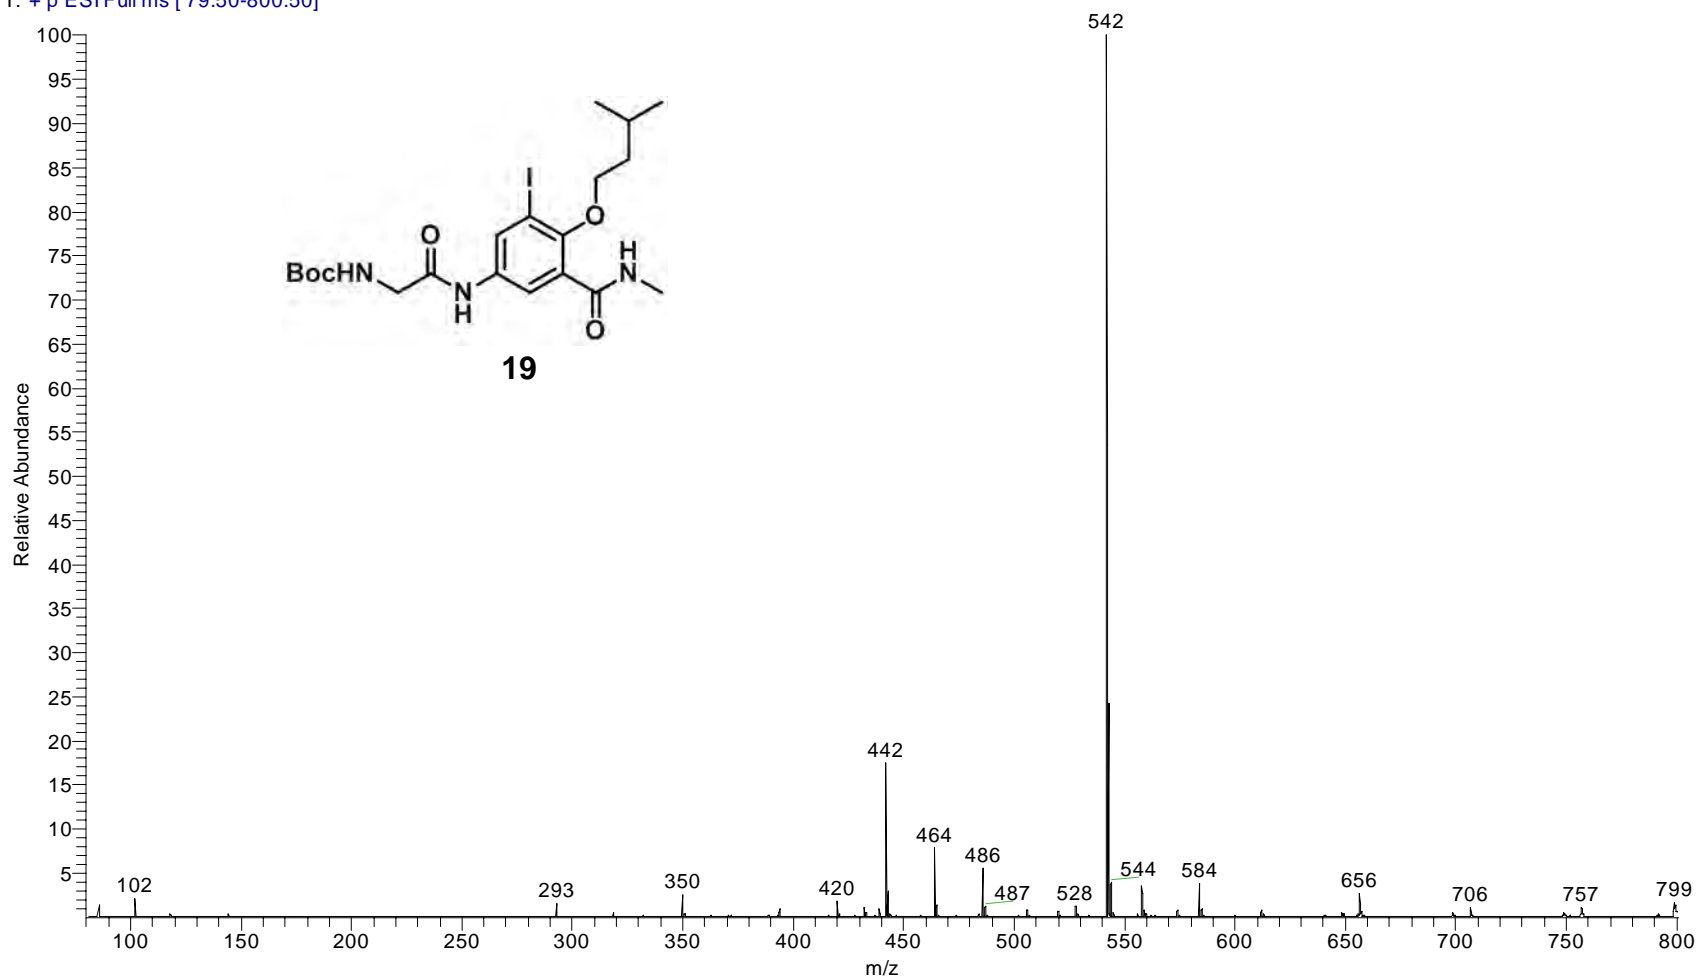



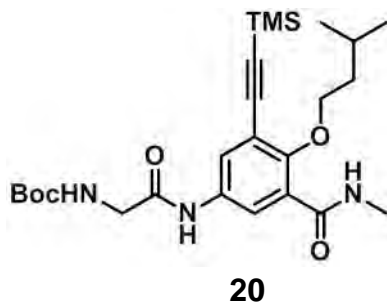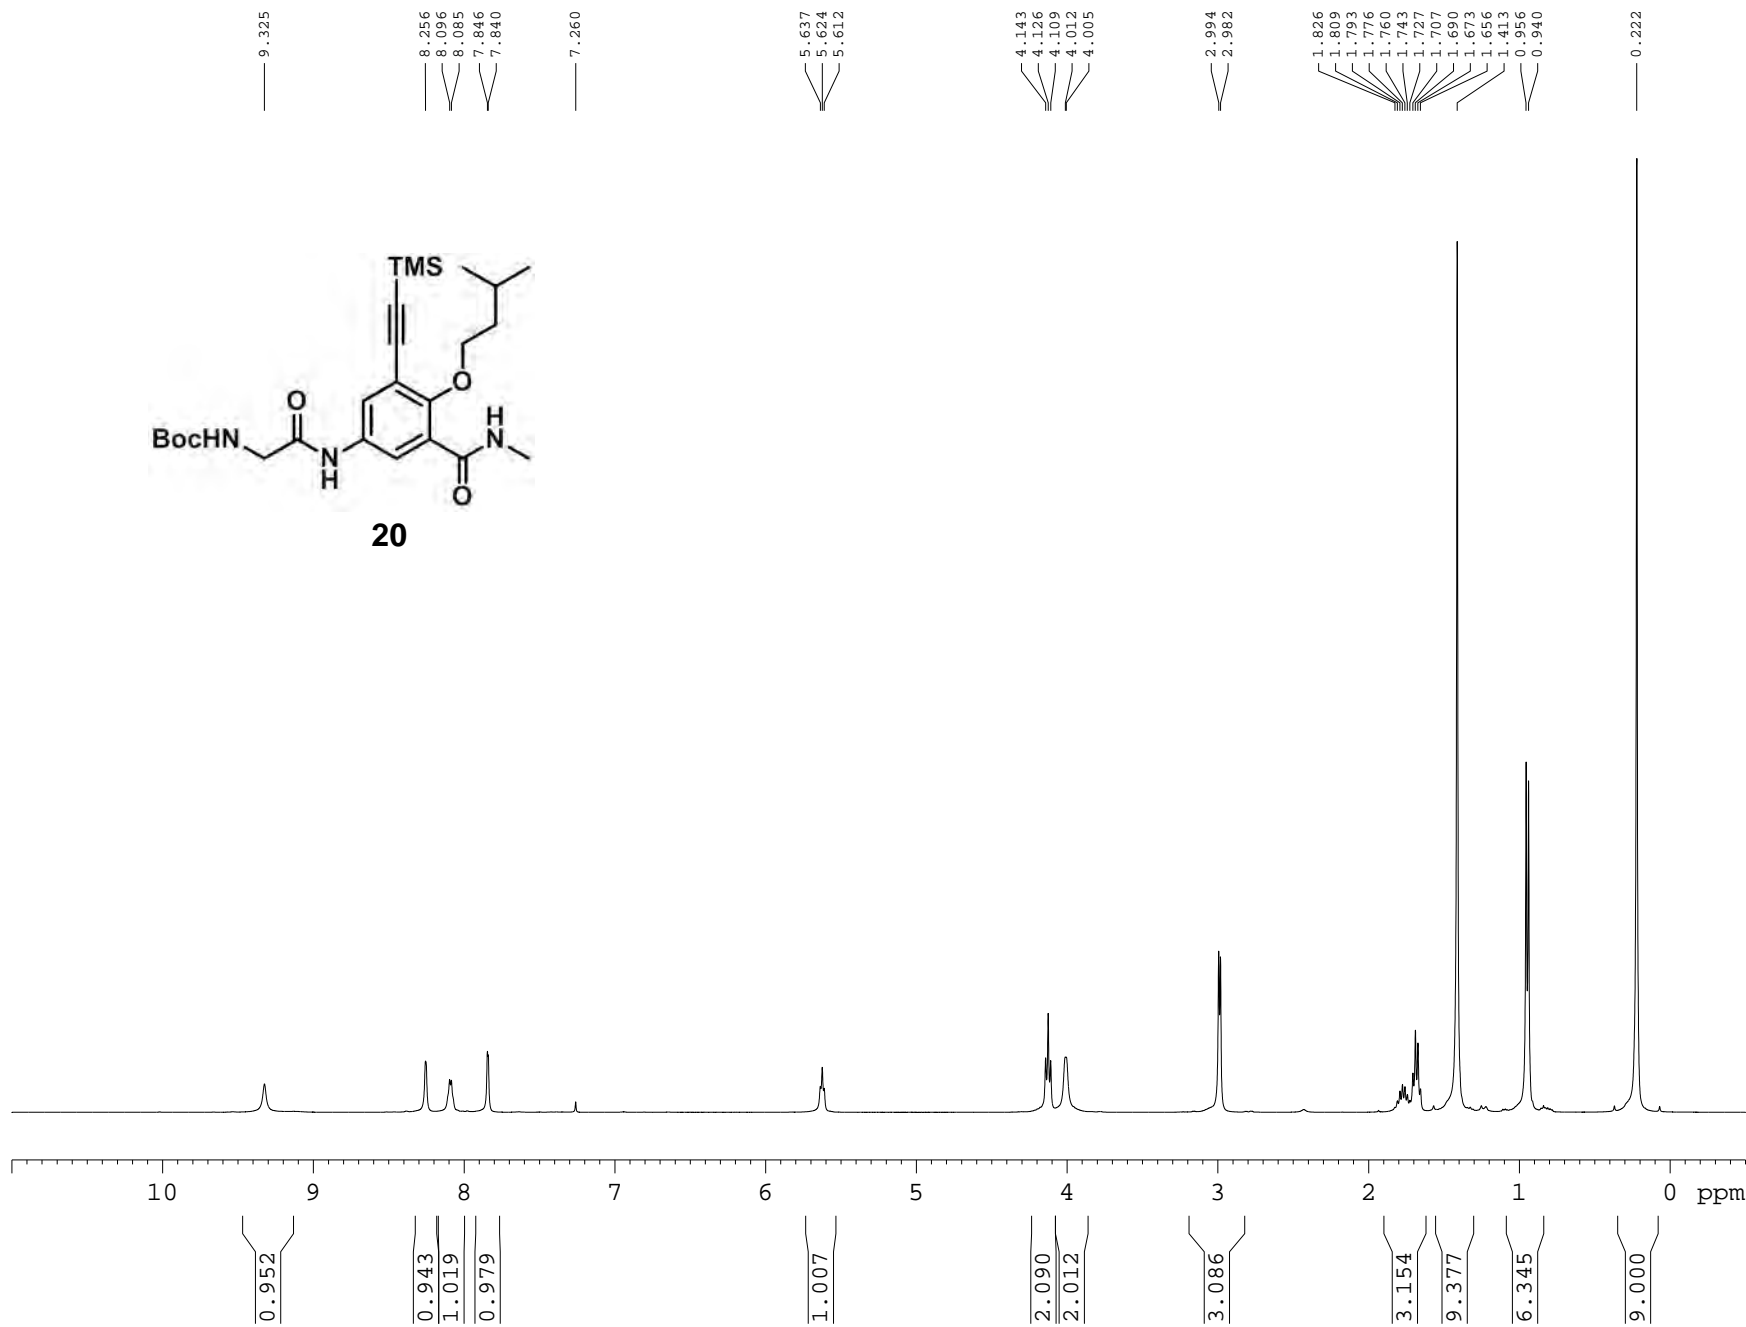

```

NAME      Sun-02052014-(TMS)-BOC-Cl
EXPNO     1
PROCNO    1
Date_     20140502
Time      23.09
INSTRUM   spect
PROBHD    5 mm PABBO BB-
PULPROG   zg30
TD         32768
SOLVENT   CDCl3
NS         16
DS         2
SWH       8223.685 Hz
FIDRES    0.250967 Hz
AQ         1.9923444 sec
RG         18
DM         60.800 usec
DE         6.50 usec
TE         295.8 K
D1         1.0000000 sec
TDO        1

===== CHANNEL f1 =====
NUC1       1H
P1         14.00 usec
PL1        -1.00 dB
PL1W       13.56617069 W
SFO1       400.1924713 MHz
SI         32768
SF         400.1900155 MHz
WDW        EM
SSB        0
LB         0.30 Hz
GB         0
PC         1.00

```

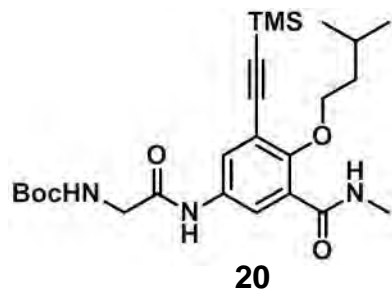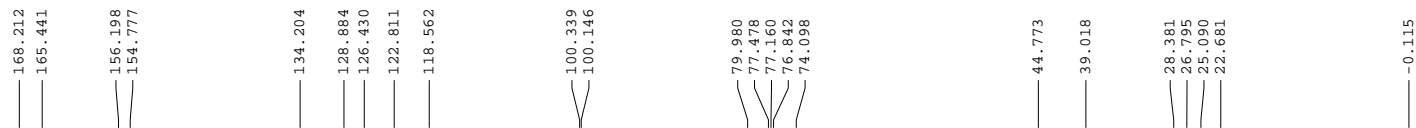

```

NAME      Sun-02052014-(TMS)-BOC-Cl
EXPNO     4
PROCNO    1
Date_     20140503
Time      14.04
INSTRUM   spect
PROBHD    5 mm PABBO BB-
PULPROG   zgpg30
TD         65536
SOLVENT   CDCl3
NS         200
DS         4
SWH        24038.461 Hz
FIDRES     0.366798 Hz
AQ         1.3631968 sec
RG         71.8
DW         20.800 usec
DE         6.50 usec
TE         296.7 K
D1         2.0000000 sec
D11        0.0300000 sec
TD0        1
  
```

```

***** CHANNEL f1 *****
NUC1       13c
P1         9.90 usec
PL1        -2.00 dB
PL1W       55.33689499 W
SF01       100.6379183 MHz
  
```

```

***** CHANNEL f2 *****
CPDPRG2    waltz16
NUC2       1H
PCPD2      90.00 usec
PL2        -1.00 dB
PL12       15.16 dB
PL13       18.62 dB
PL2W       13.56617069 W
PL12W      0.32844096 W
PL13W      0.14806664 W
SF02       400.1916008 MHz
SI         32768
SF         100.6278515 MHz
WDW        EM
SSB        0
LB         1.00 Hz
GB         0
PC         1.40
  
```

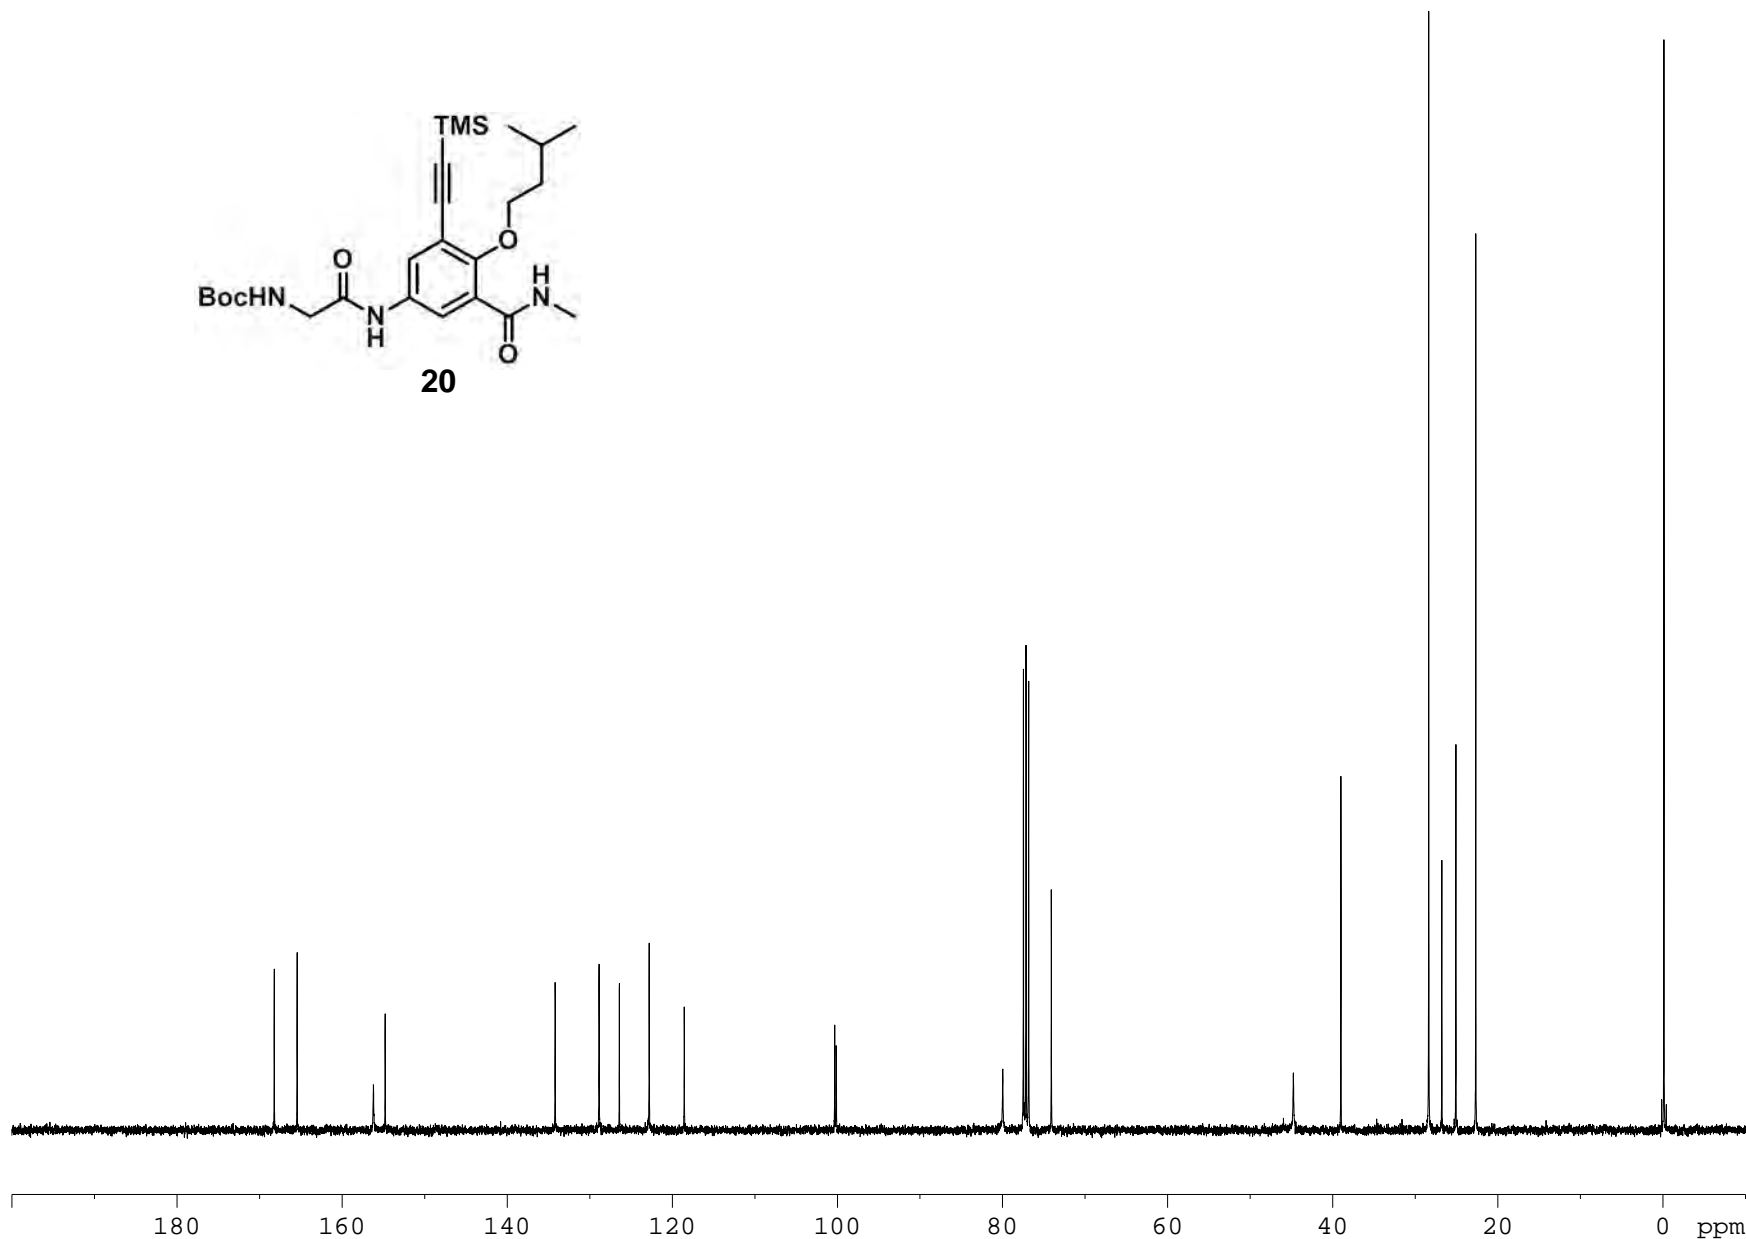

hfc2114\_140613170333 #1-2 RT: 0.13-0.21 AV: 2 SM: 5G NL: 1.05E6  
T: + p ESI Full ms [ 99.50-800.50]

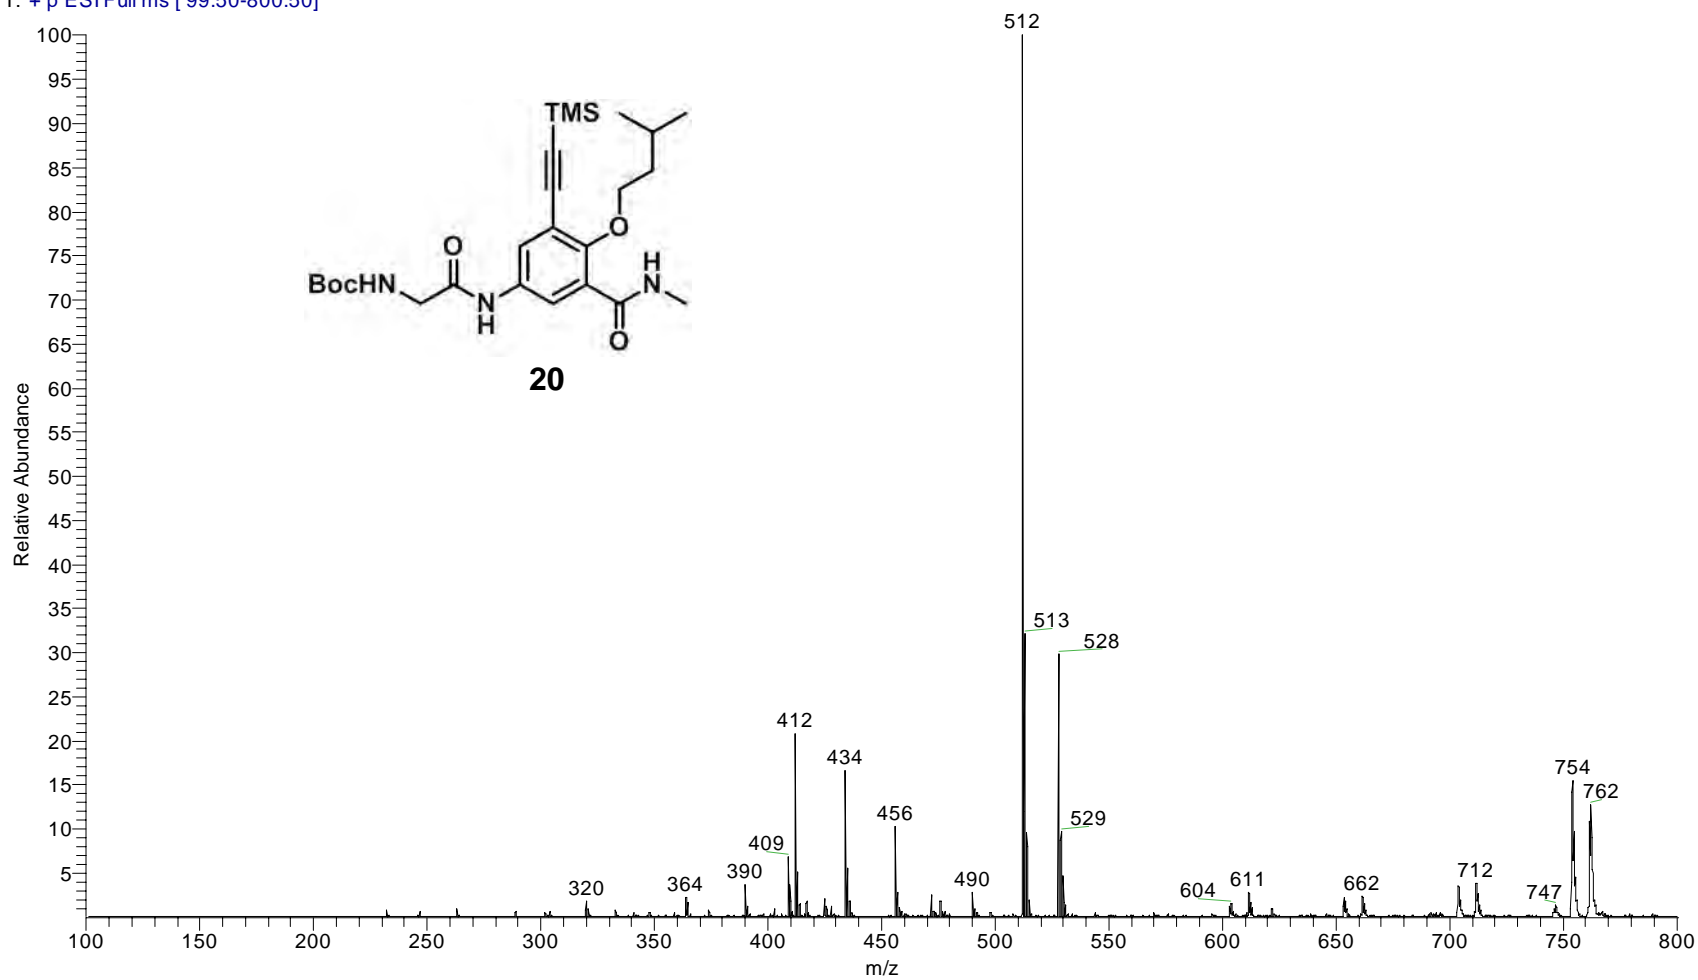

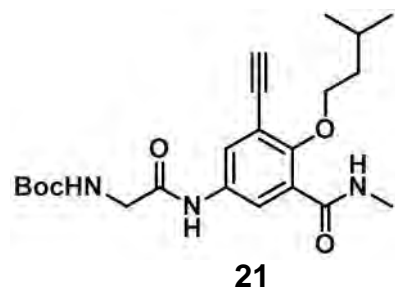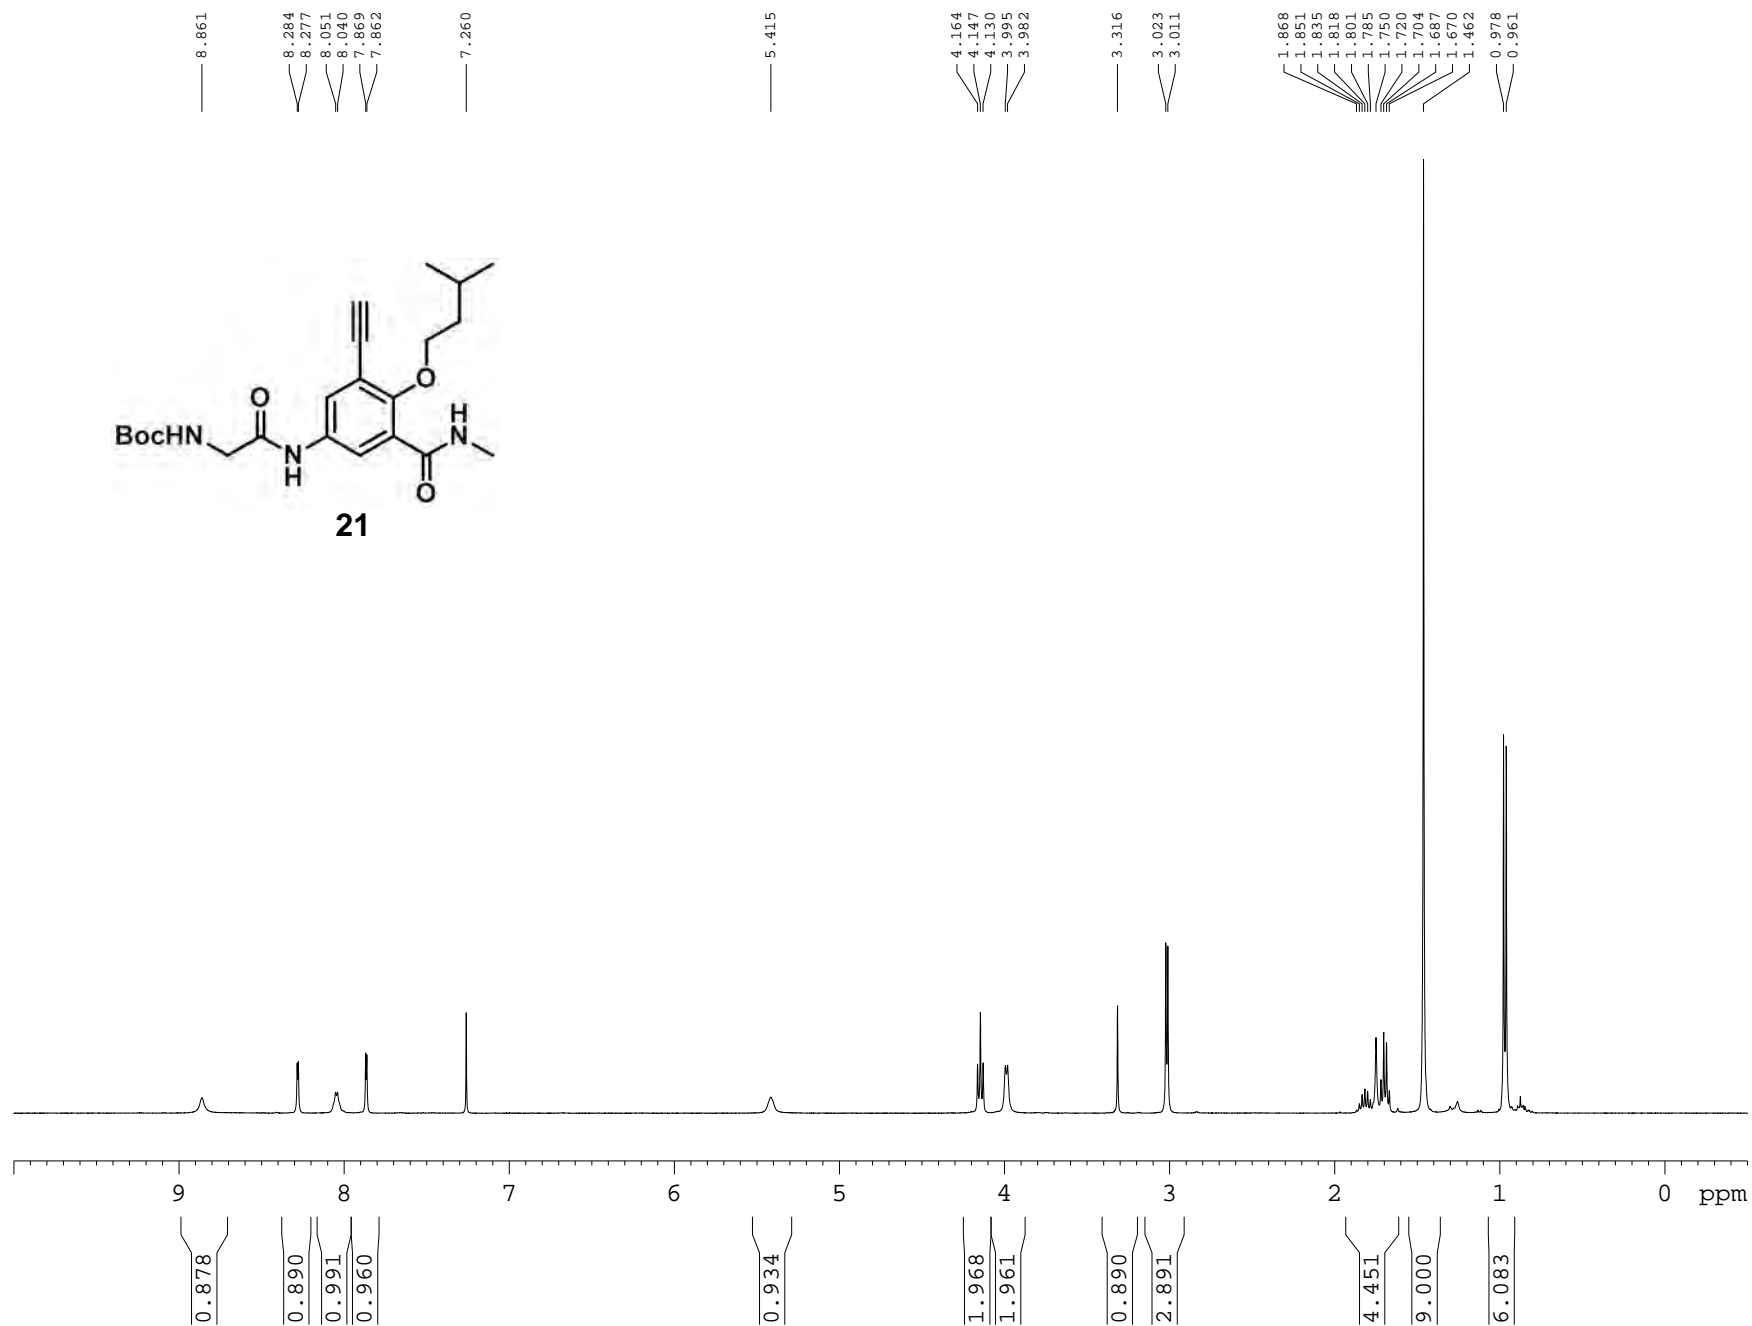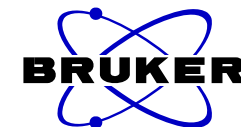

```

NAME      Sun-05052014-(CCH)-BOC-Cl
EXPNO     1
PROCNO    1
Date_     20140505
Time      14.07
INSTRUM   spect
PROBHD    5 mm PADUL 13C
PULPROG   zg30
TD         32768
SOLVENT   CDCl3
NS         16
DS         2
SWH        8223.685 Hz
FIDRES     0.250967 Hz
AQ         1.9923444 sec
RG         203
DM         60.800 usec
DE         6.50 usec
TE         294.2 K
D1         1.0000000 sec
TDO        1

===== CHANNEL f1 =====
NUC1       1H
P1         14.83 usec
PL1        0.00 dB
PL1W       8.31434441 W
SFO1       400.1324710 MHz
SI         32768
SF         400.1300087 MHz
WDW        EM
SSB        0
LB         0.30 Hz
GB         0
PC         1.00

```

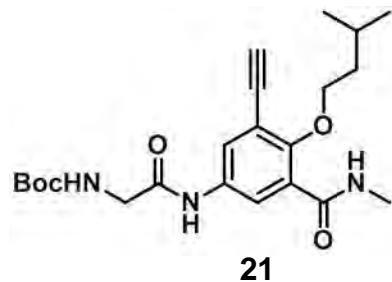

168.346  
165.376  
156.279  
154.982  
134.263  
128.871  
126.683  
123.129  
117.537

82.615  
80.036  
79.264  
77.479  
77.160  
76.842  
74.242

44.825  
39.021

28.379  
26.782  
24.926  
22.634

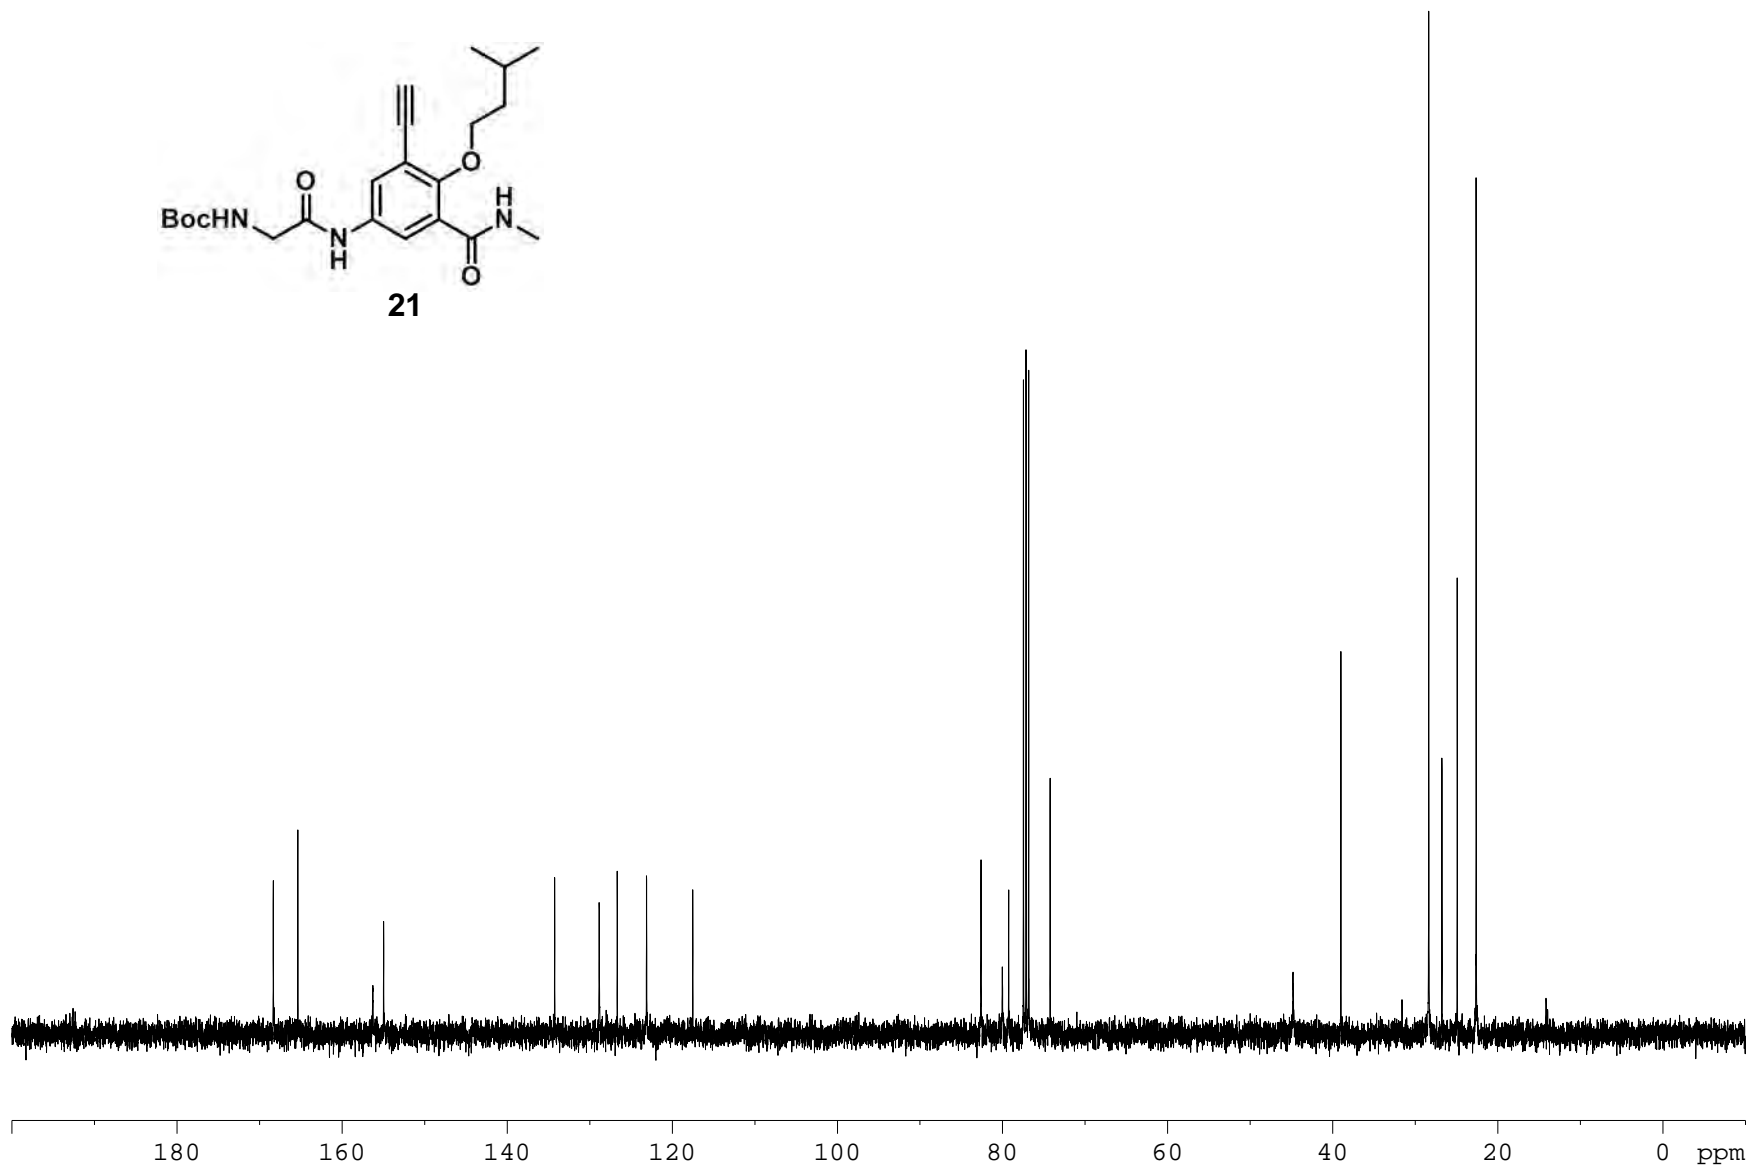

```
NAME Sun-05052014-(CCH)-BOC-Cl
EXPNO 6
PROCNO 1
Date_ 20140505
Time 20.55
INSTRUM spect
PROBHD 5 mm PADUL 13C
PULPROG zgpg30
TD 65536
SOLVENT CDCl3
NS 32
DS 4
SWH 24038.461 Hz
FIDRES 0.366798 Hz
AQ 1.3631968 sec
RG 203
DN 20.800 usec
DE 6.50 usec
TE 294.9 K
D1 2.0000000 sec
D11 0.0300000 sec
TDO 1
```

```
***** CHANNEL f1 *****
NUC1 13c
P1 9.68 usec
PL1 -0.60 dB
PL1W 41.24164963 W
SF01 100.6228298 MHz
```

```
***** CHANNEL f2 *****
CPDPRG2 waltz16
NUC2 1H
PCPD2 90.00 usec
PL2 0.00 dB
PL12 15.66 dB
PL13 15.92 dB
PL2W 8.31434441 W
PL12W 0.22585411 W
PL13W 0.21272963 W
SF02 400.1316005 MHz
SI 32768
SF 100.6127626 MHz
WDW EM
SSB 0
LB 1.00 Hz
GB 0
PC 1.40
```

hfc1996 #1-3 RT: 0.13-0.29 AV: 3 SM: 5G NL: 1.35E6  
T: + p ESI Full ms [ 99.50-800.50]

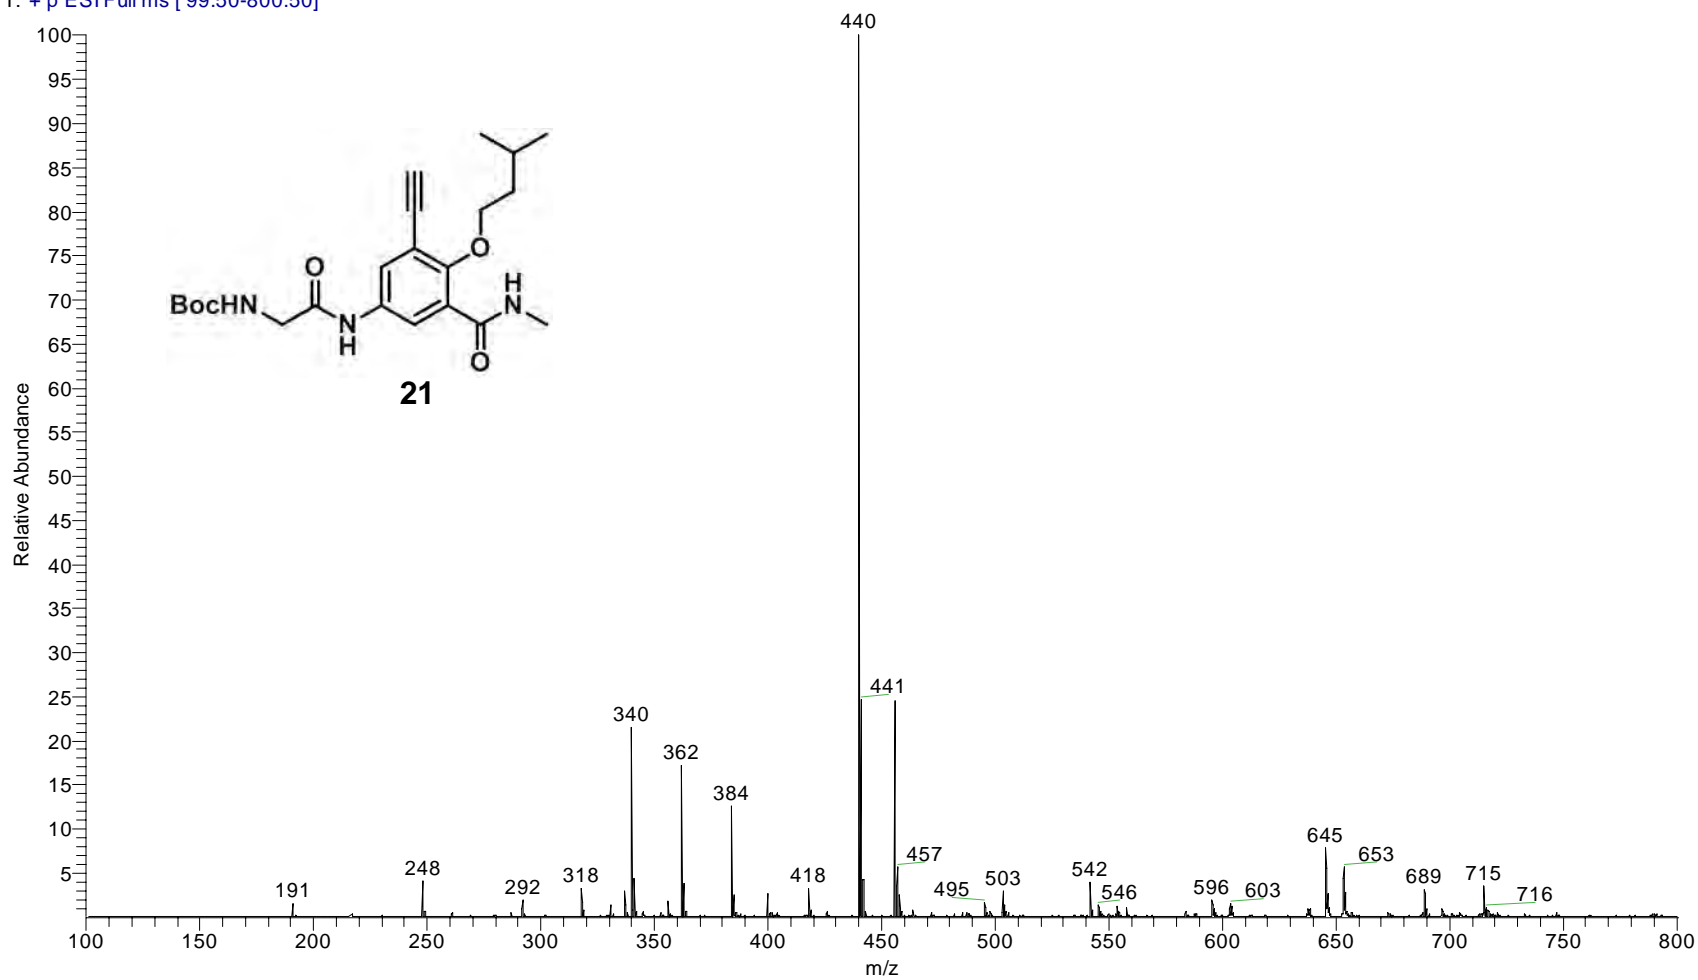

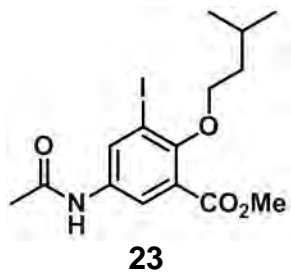

8.801  
 8.143  
 8.138  
 7.855  
 7.845  
 7.260

3.873  
 3.856  
 3.839  
 3.810

2.139  
 2.022  
 1.864  
 1.847  
 1.831  
 1.814  
 1.798  
 1.781  
 1.765  
 1.748  
 1.707  
 1.691  
 1.674  
 1.657  
 0.928  
 0.911

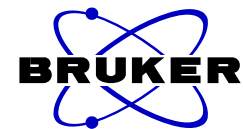

```

NAME      Sun-11092013-(I)-C1-CO2Me
EXPNO     1
PROCNO    1
Date_     20130911
Time      21.47
INSTRUM   spect
PROBHD    5 mm PABBO BB-
PULPROG   zg30
TD         32768
SOLVENT   CDCl3
NS         16
DS         2
SWH        8223.685 Hz
FIDRES     0.250967 Hz
AQ         1.9923444 sec
RG         18
DW         60.800 usec
DE         6.50 usec
TE         296.6 K
D1         1.0000000 sec
TDO        1

===== CHANNEL f1 =====
NUC1       1H
P1         14.00 usec
PL1        -1.00 dB
PL1W       13.56617069 W
SFO1       400.1924713 MHz
SI         32768
SF         400.1900157 MHz
WDW        EM
SSB        0
LB         0.30 Hz
GB         0
PC         1.00
  
```

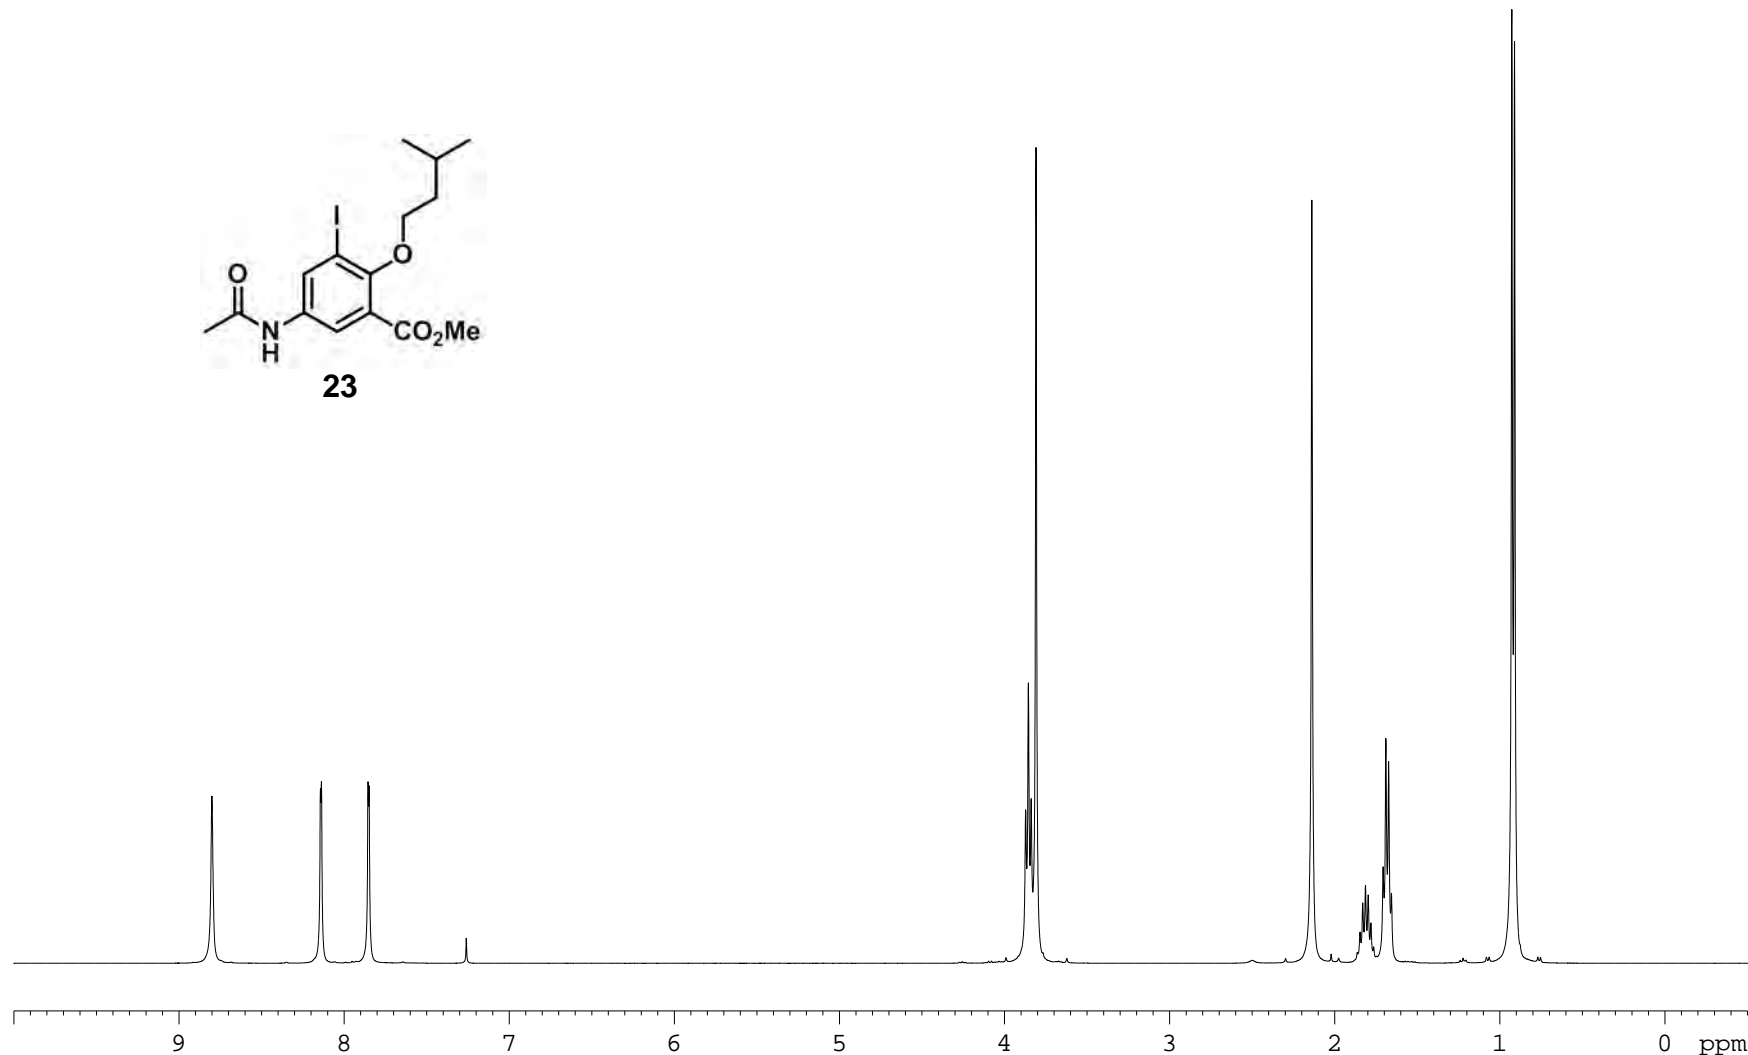

0.981

0.956

0.972

2.039  
 2.723

2.868

0.989

1.954

6.000

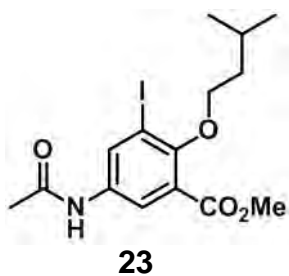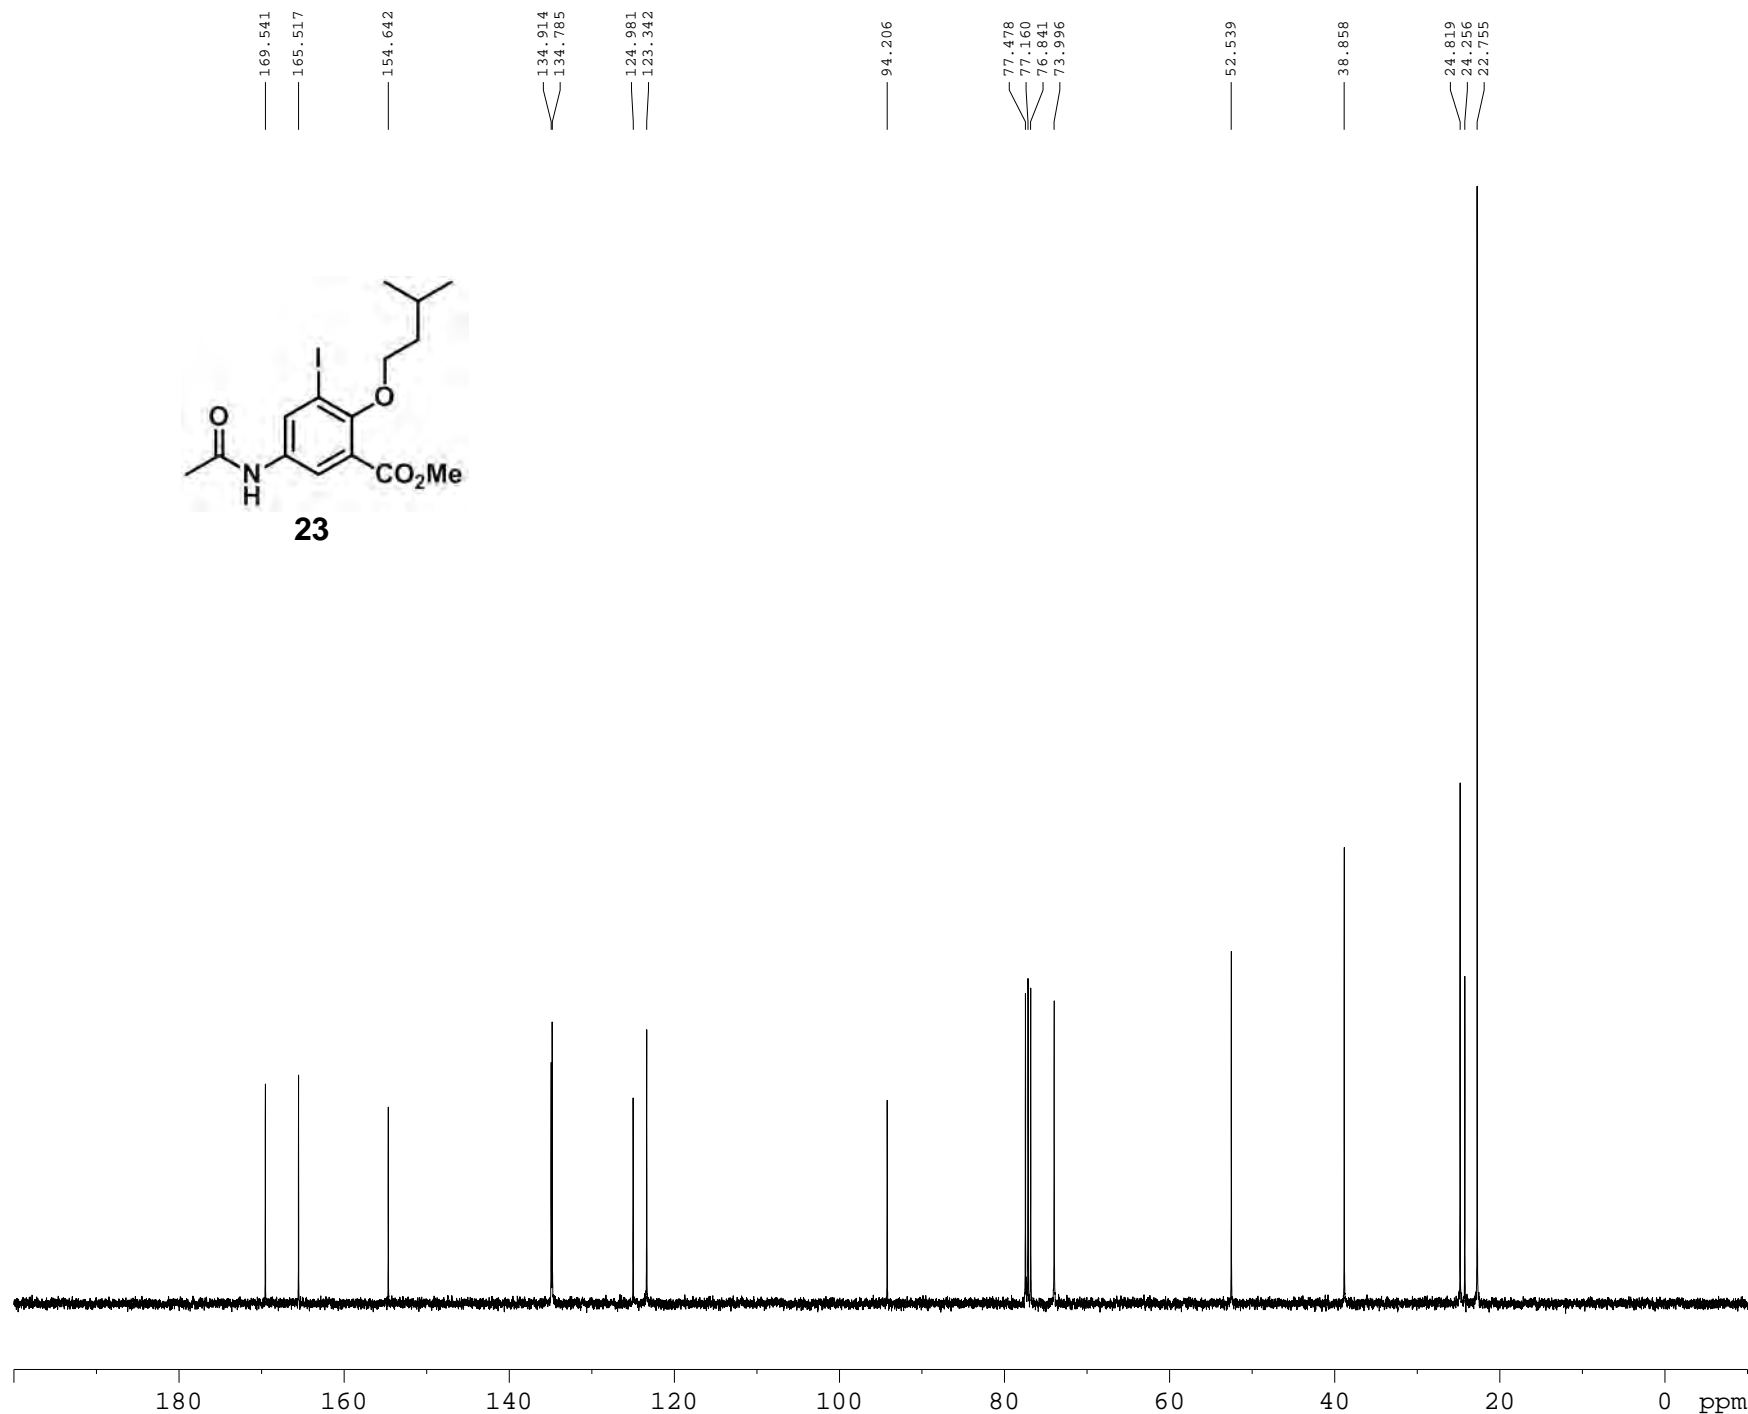

```

NAME      Sun-11092013-(1)-C1-CO2Me
EXPNO     2
PROCNO    1
Date_     20130911
Time      21.50
INSTRUM    spect
PROBHD     5 mm PABBO BB-
PULPROG    zgpg30
TD          65536
SOLVENT    CDCl3
NS          65
DS          4
SWH        24038.461 Hz
FIDRES     0.366798 Hz
AQ         1.3631968 sec
RG          1290
DM         20.800 usec
DE         6.50 usec
TE         296.9 K
D1         2.0000000 sec
D11        0.0300000 sec
TD0        1

***** CHANNEL f1 *****
NUC1       13c
P1         9.90 usec
PL1        -2.00 dB
PL1W       55.33689499 W
SFO1       100.6379183 MHz

***** CHANNEL f2 *****
CPDPRG2    waltz16
NUC2       1H
PCPD2     90.00 usec
PL2        -1.00 dB
PL12       15.16 dB
PL13       18.62 dB
PL2W       13.56617069 W
PL12W      0.32844096 W
PL13W      0.14806664 W
SFO2       400.1916008 MHz
SI         32768
SF         100.6278572 MHz
WDW        EM
SSB        0
LB         1.00 Hz
GB         0
PC         1.40

```



hfc2116 #1-2 RT: 0.14-0.27 AV: 2 SM: 5G NL: 2.15E6  
T: + p ESI Full ms [ 99.50-800.50]

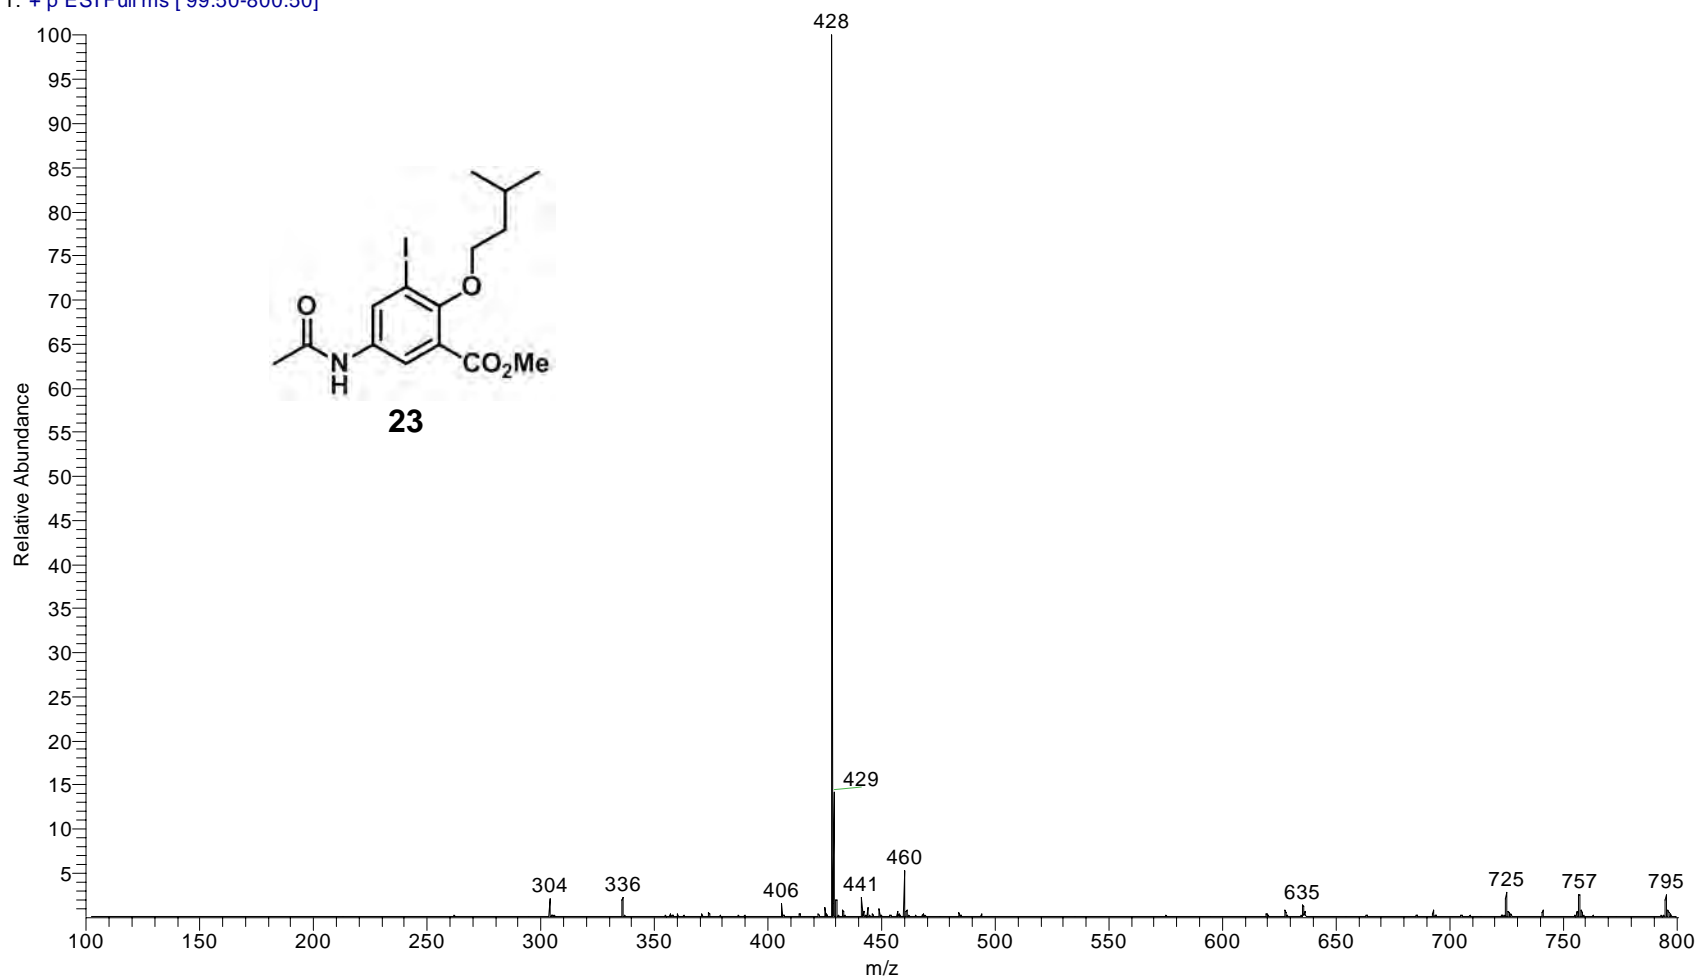

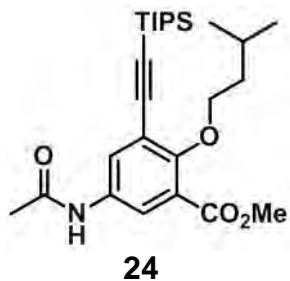

7.798  
7.791  
7.781  
7.775

7.260  
7.118

4.162  
4.145  
4.128

3.885

2.163  
1.799  
1.782  
1.765  
1.749  
1.736  
1.719  
1.702  
1.686  
1.560  
1.276  
1.250  
1.128  
0.938  
0.922

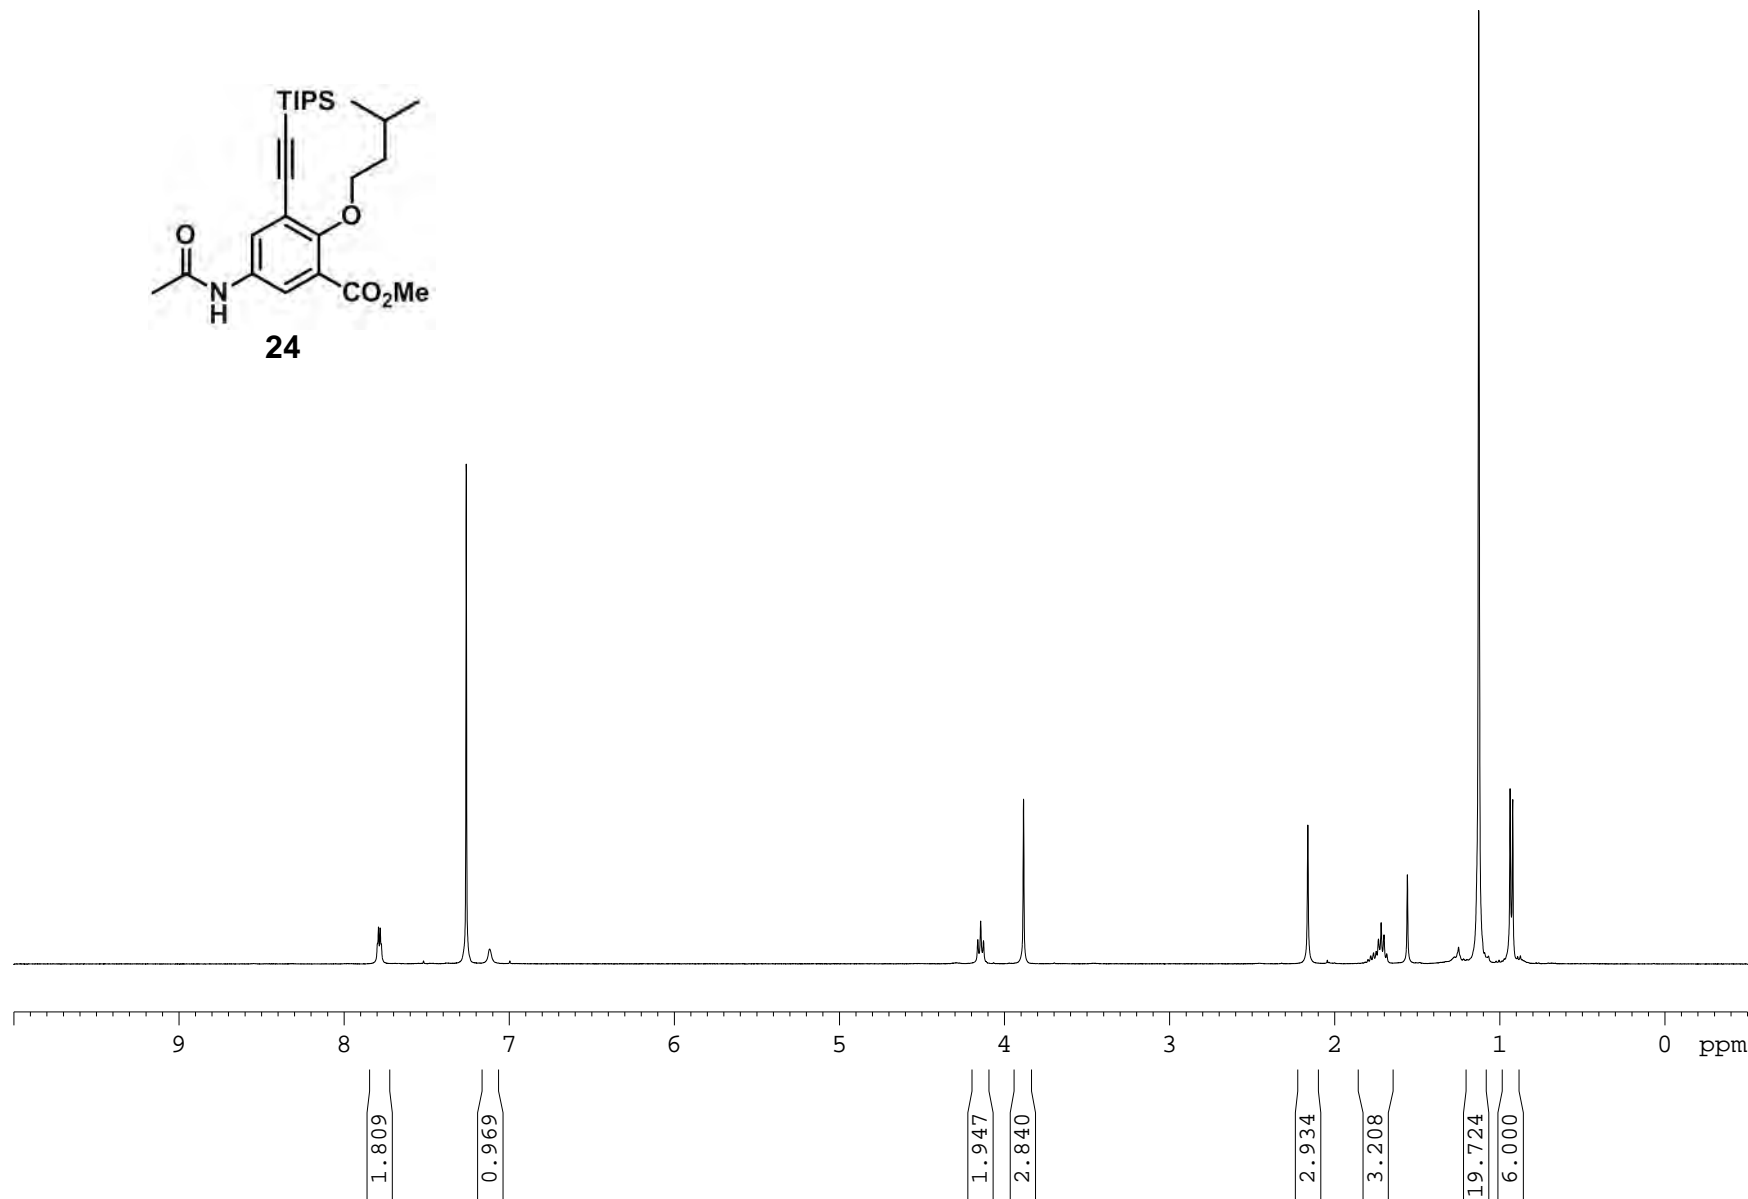

```

NAME      Sun-18102013-[TIPS]-C1-CO2Me
EXPNO     1
PROCNO    1
Date_     20131018
Time      17.00
INSTRUM   spect
PROBHD    5 mm PABBO BB-
PULPROG   zg30
TD         32768
SOLVENT   CDCl3
NS         32
DS         2
SWH        8223.685 Hz
FIDRES     0.250967 Hz
AQ         1.9923444 sec
RG         144
DW         60.800 usec
DE         6.50 usec
TE         296.1 K
D1         1.00000000 sec
TD0        1

***** CHANNEL f1 *****
NUC1       1H
P1         14.00 usec
PL1        -1.00 dB
PL1W       13.56617069 W
SFO1       400.1924713 MHz
SI         32768
SF         400.1900151 MHz
WDW        EM
SSB        0
LB         0.30 Hz
GB         0
PC         1.00

```

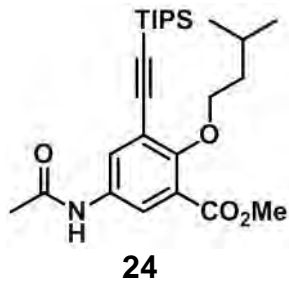

169.350  
166.241  
156.405  
133.523  
129.551  
125.597  
122.961  
119.774  
102.216  
96.419  
77.478  
77.160  
76.841  
73.978  
52.306  
38.836  
25.010  
24.111  
22.722  
18.651  
11.271

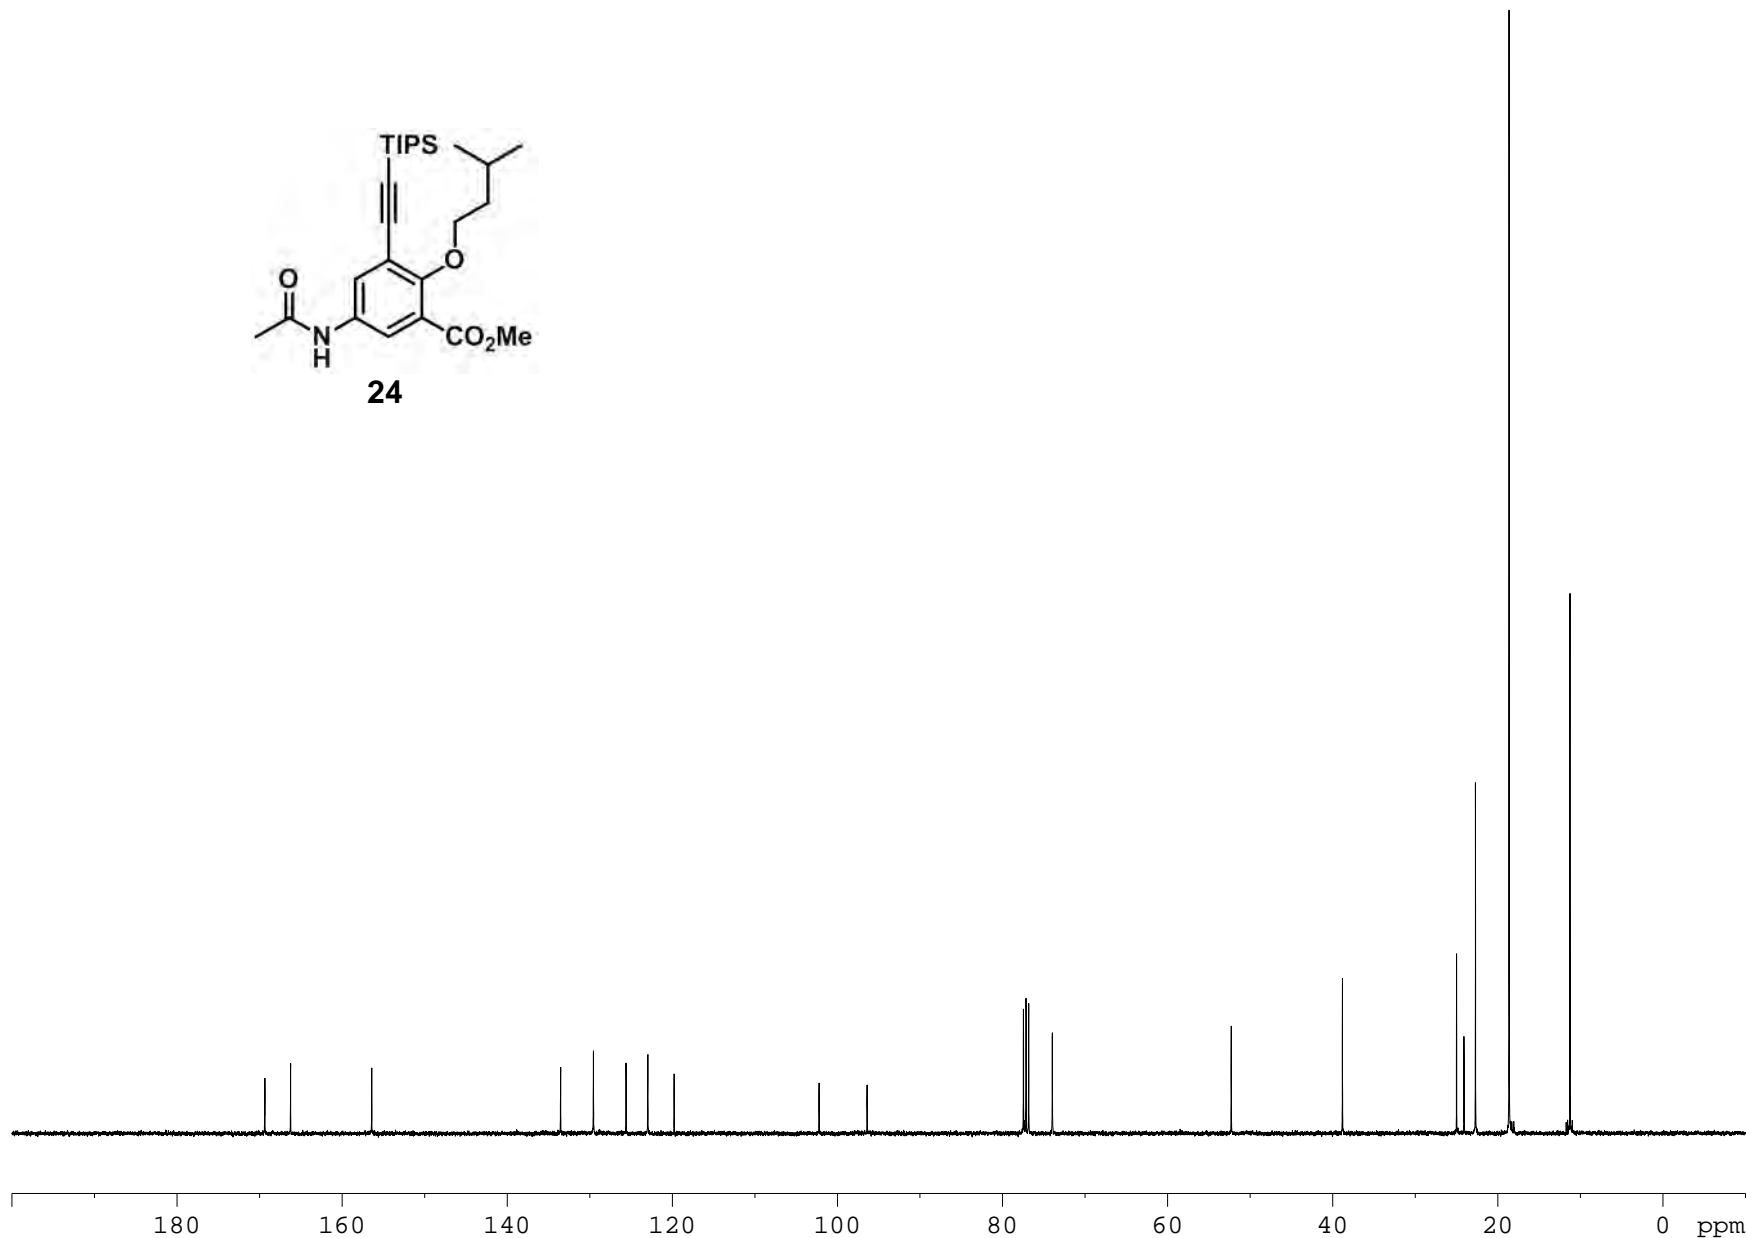

```
NAME Sun-18102013-(TIPS)-Cl-CO2Me
EXPNO 2
PROCNO 1
Date_ 20131018
Time 21.17
INSTRUM spect
PROBHD 5 mm PABBO BB-
PULPROG zgpg30
TD 65536
SOLVENT CDCl3
NS 64
DS 4
SWH 24038.461 Hz
FIDRES 0.366798 Hz
AQ 1.3631988 sec
RG 812
DW 20.800 usec
DE 6.50 usec
TE 296.2 K
D1 2.0000000 sec
D11 0.0300000 sec
TDO 1
===== CHANNEL f1 =====
NUC1 13C
P1 9.90 usec
PL1 -2.00 dB
PLW 55.33689499 W
SFO1 100.6278550 MHz
===== CHANNEL f2 =====
PCPD2 walrx16
NUC2 1H
PCPD2 90.00 usec
PL2 -1.00 dB
PL12 15.16 dB
PL13 18.62 dB
PLW 13.56617069 W
PL12W 0.32844096 W
PL13W 0.14806664 W
SFO2 400.1315098 MHz
SI 32768
SF 100.6278550 MHz
WDW EM
SSB 0
LB 1.00 Hz
GB 0
PC 1.40
```

hfc1993 #1-2 RT: 0.14-0.22 AV: 2 SM: 5G NL: 3.92E6  
T: + p ESI Full ms [ 79.50-800.50]

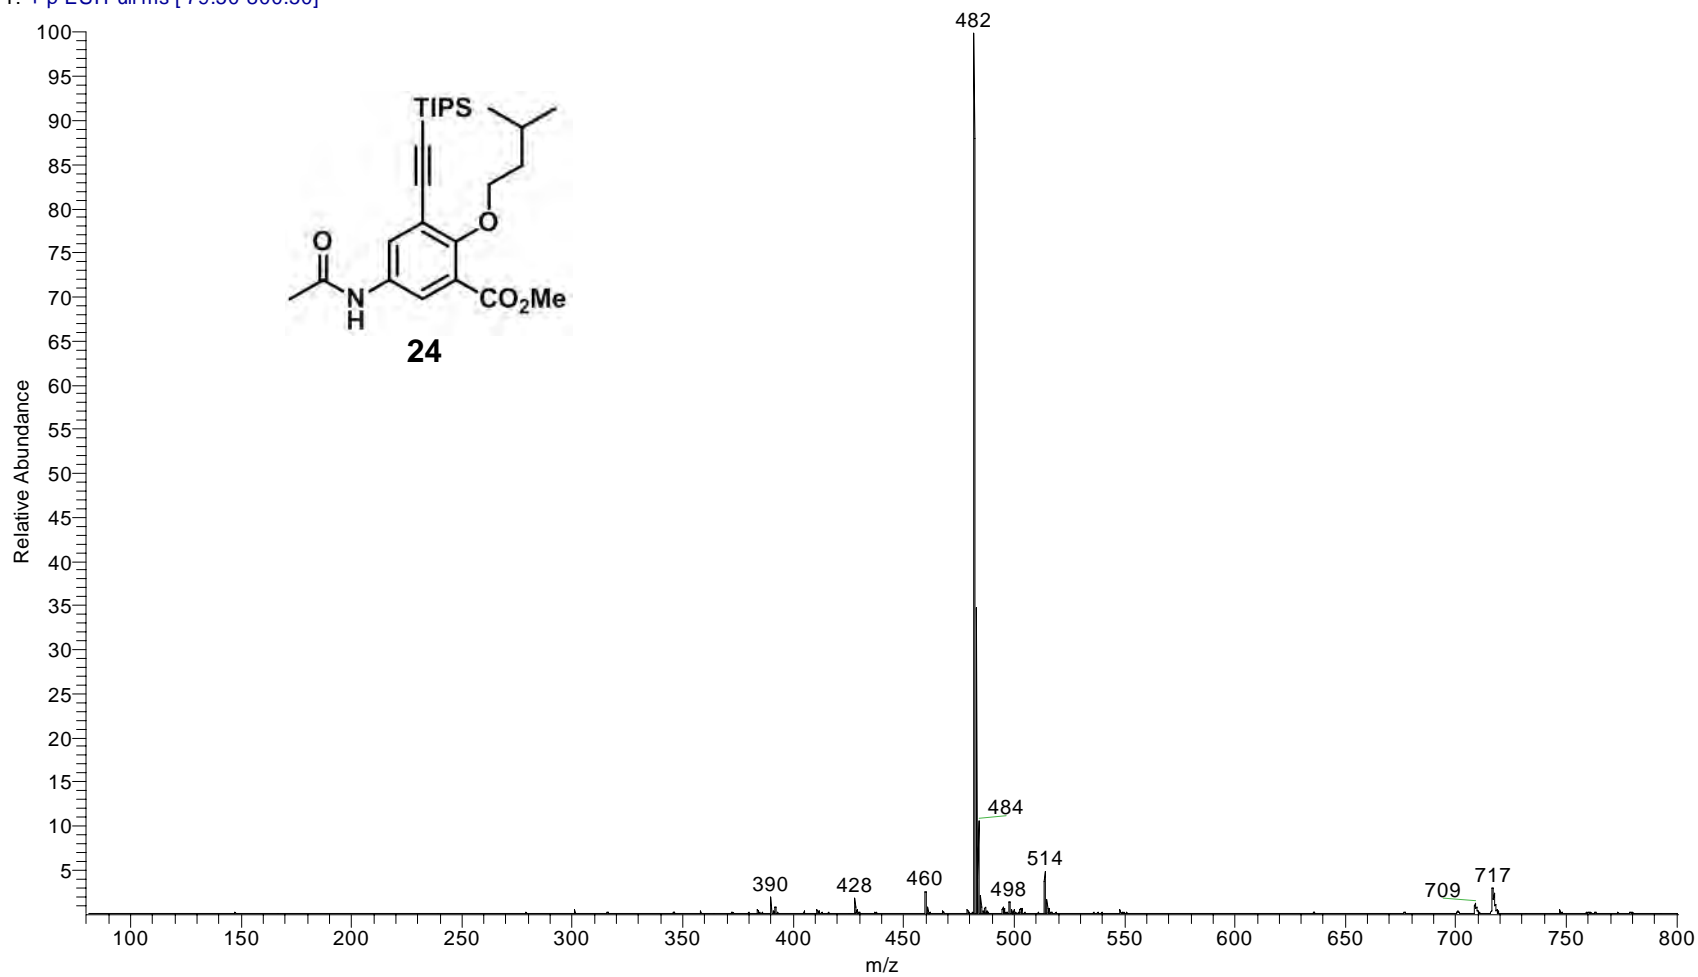

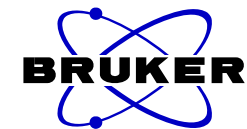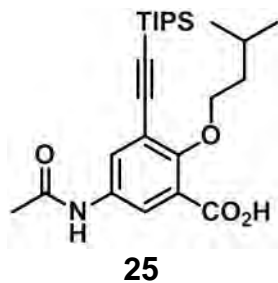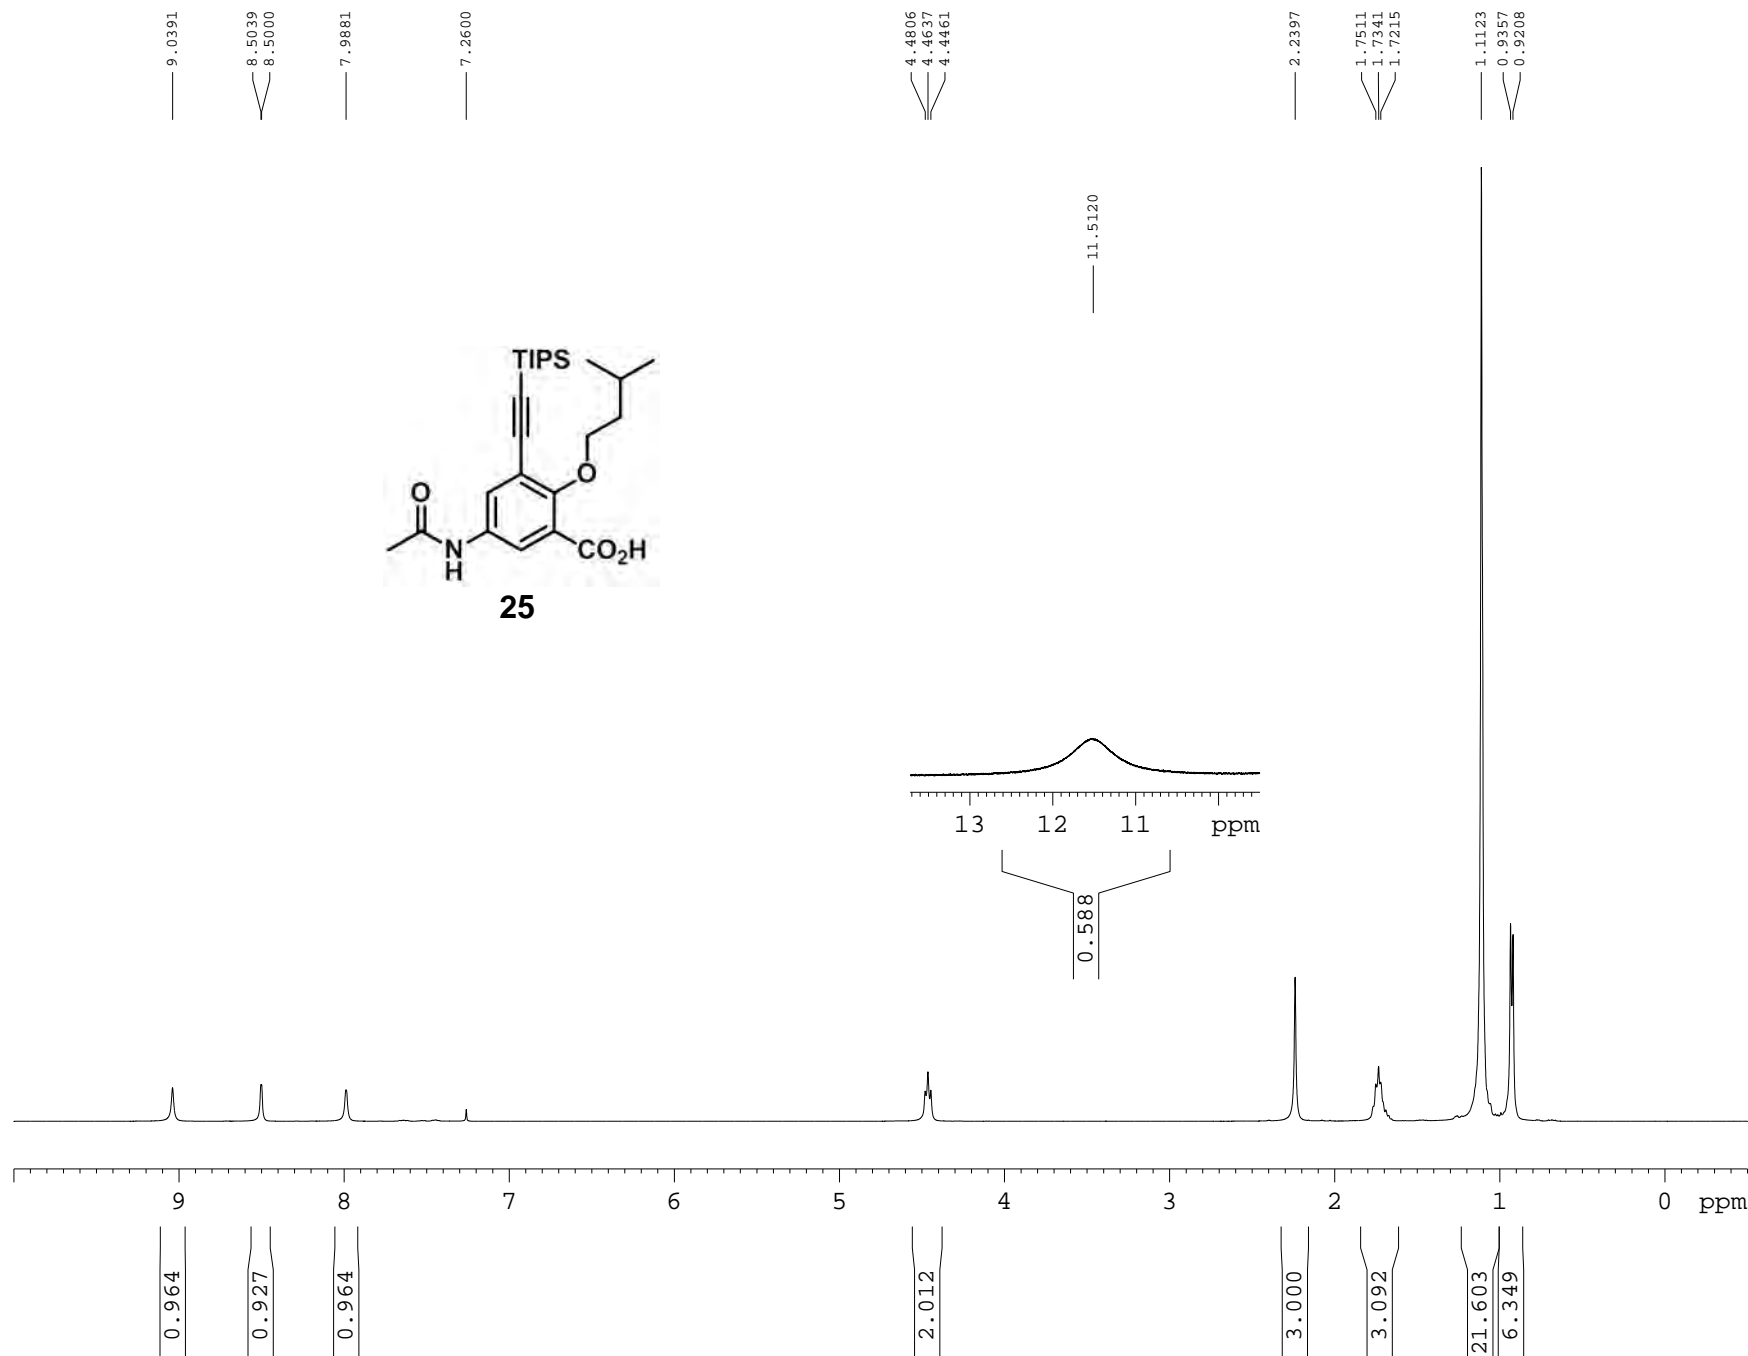

```
NAME Sun-11092013-(TIPS)-Cl-COOH
EXPNO 1
PROCNO 1
Date_ 20130911
Time 21.38
INSTRUM spect
PROBHD 5 mm PABBO BB-
PULPROG zg30
TD 32768
SOLVENT CDCl3
NS 16
DS 2
SWH 8223.685 Hz
FIDRES 0.250967 Hz
AQ 1.9923444 sec
RG 16
DW 60.800 usec
DE 6.50 usec
TE 296.6 K
D1 1.00000000 sec
TDO 1
===== CHANNEL f1 =====
NUC1 1H
P1 14.00 usec
PL1 -1.00 dB
PLW 13.56617069 MHz
SFO1 400.1924713 MHz
SI 32768
SF 400.1900155 MHz
WDW EM
SSB 0
LB 0.30 Hz
GB 0
PC 1.00
```

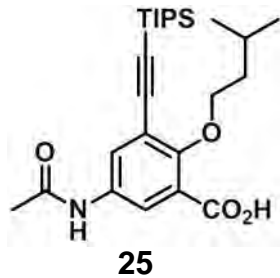

— 169.764  
 — 165.874  
 — 154.947

— 135.457  
 — 131.439  
 — 123.503  
 — 121.774  
 — 118.217

— 101.437  
 — 98.804

77.478  
 77.160  
 76.842  
 75.486

— 38.533

25.177  
 24.339  
 22.643  
 18.734

— 11.349

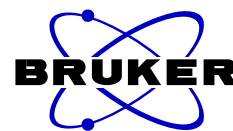

```

NAME Sun-11092013-(TIPS)-Cl-COOH
EXPNO 2
PROCNO 1
Date_ 20130911
Time 21.41
INSTRUM spect
PROBHD 5 mm PABBO BB-
PULPROG zgpg30
TD 65536
SOLVENT CDCl3
NS 64
DS 4
SWH 24038.461 Hz
FIDRES 0.366798 Hz
AQ 1.3631988 sec
RG 222
DW 20.800 usec
DE 6.50 usec
TE 296.9 K
D1 2.0000000 sec
D11 0.0300000 sec
TDO 1
  
```

```

***** CHANNEL f1 *****
NUC1 13C
P1 9.90 usec
PL1 -2.00 dB
PLW 55.33689499 W
SFO1 100.6379183 MHz
  
```

```

***** CHANNEL f2 *****
CPDPRG2 waltz16
NUC2 1H
PCPD2 90.00 usec
PL2 -1.00 dB
PL12 15.16 dB
PL13 18.62 dB
PL2W 13.56617069 W
PL12W 0.32844096 W
PL13W 0.14806654 W
SFO2 400.1916008 MHz
SI 32768
SF 100.6278488 MHz
WDW EM
SSB 0
LB 1.00 Hz
GB 0
PC 1.40
  
```

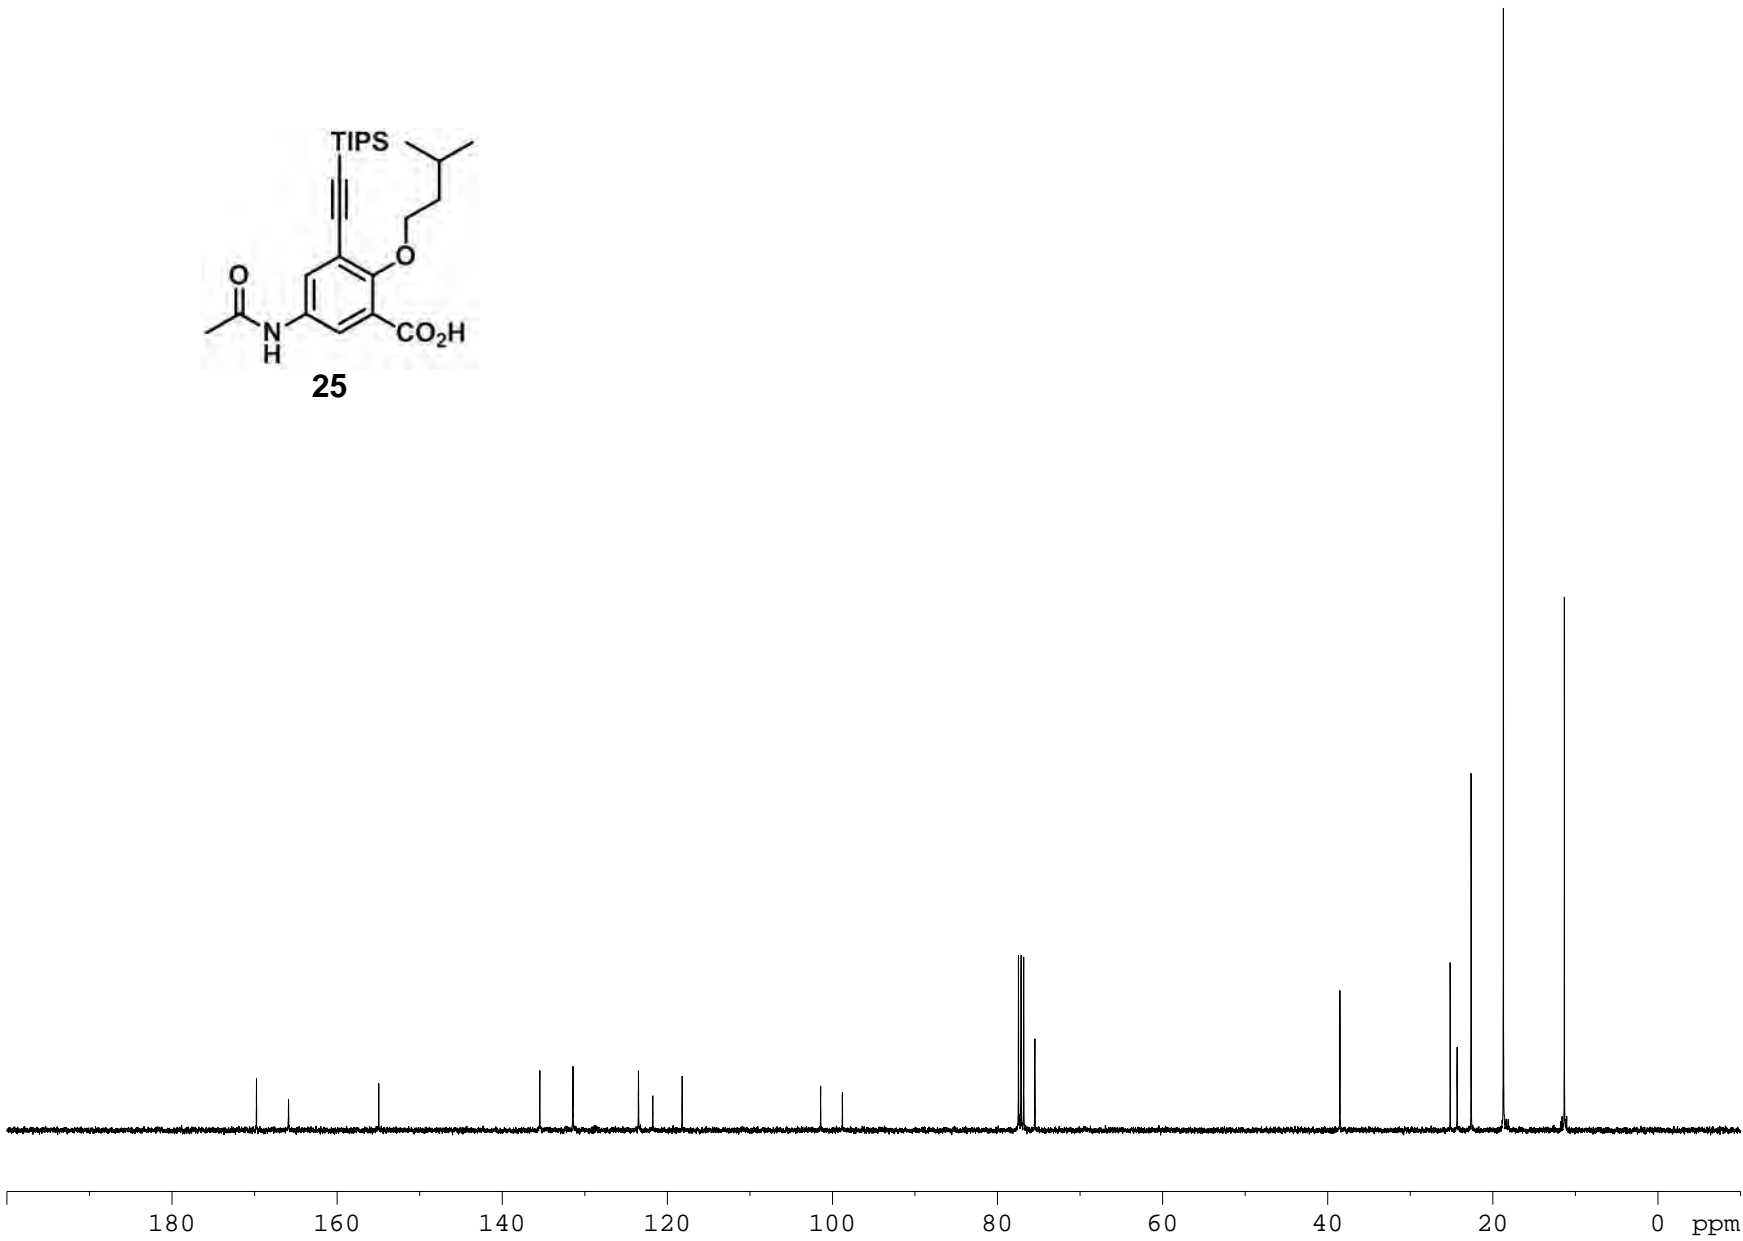

hfc2115 #10 RT: 0.85 AV: 1 SM: 5G NL: 1.11E6  
T: + p ESI Full ms [ 99.50-800.50]

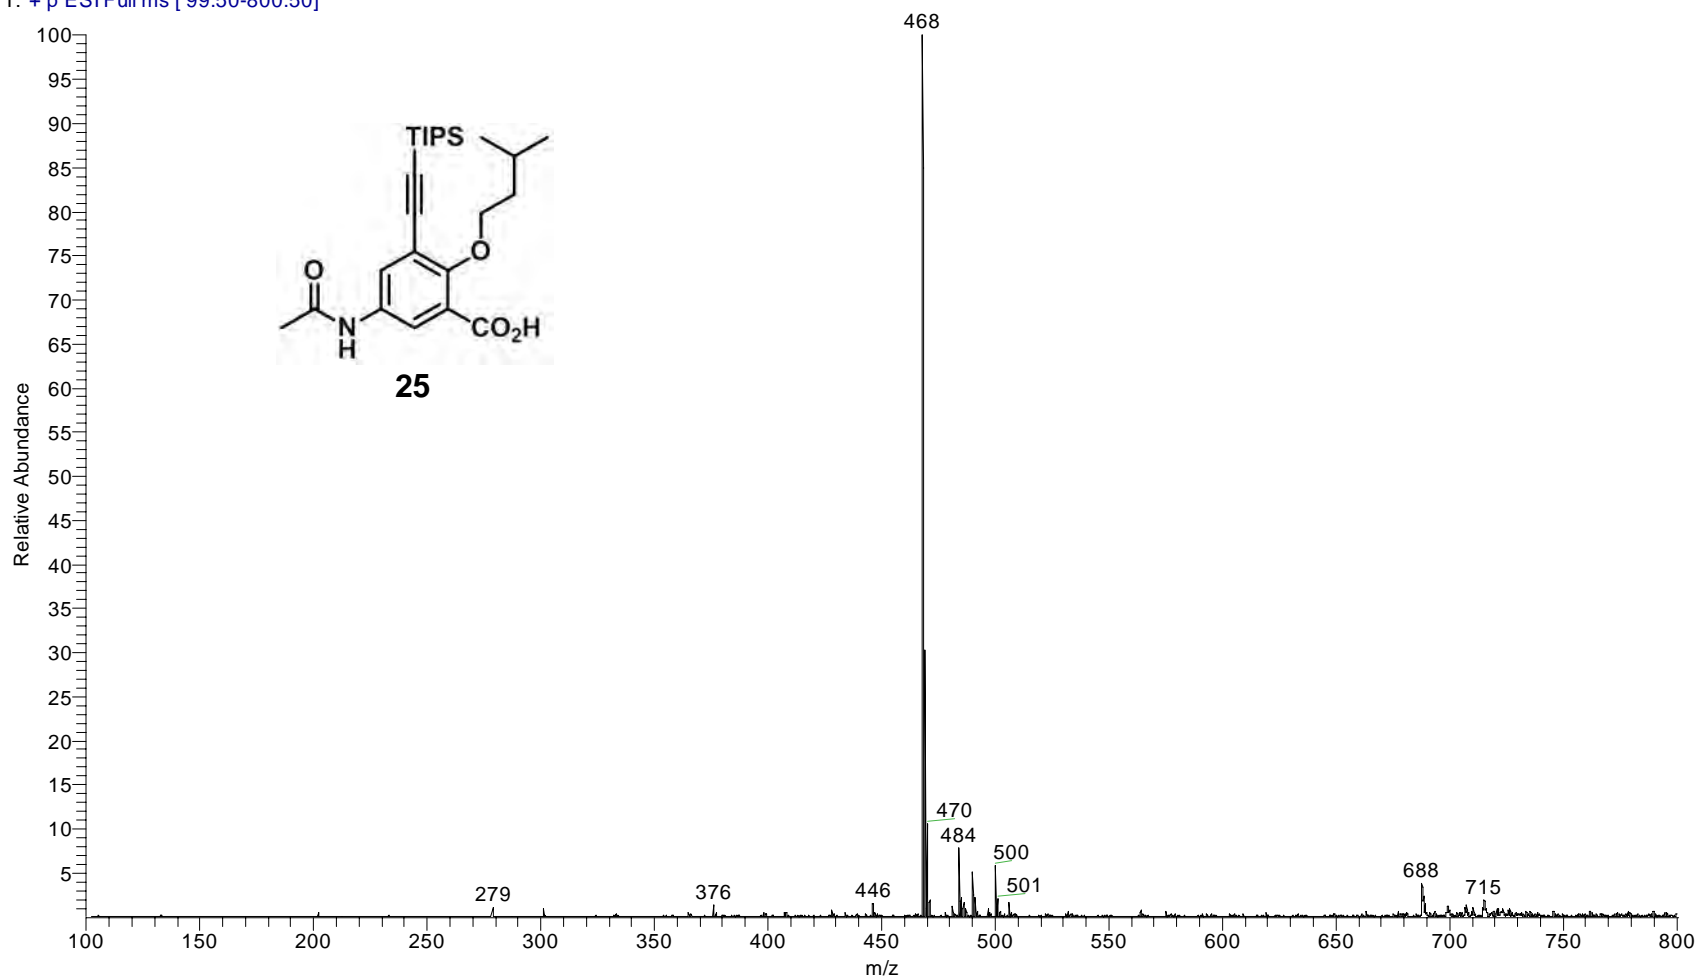



```
NAME Sun-30042014-(TIPS,CCH)-C1-C1
EXPNO 1
PROCNO 1
Date_ 20140430
Time 14.53
INSTRUM spect
PROBHD 5 mm PABBO BB-
PULPROG zg30
TD 32768
SOLVENT CDCl3
NS 16
DS 2
SWH 8223.685 Hz
FIDRES 0.250967 Hz
AQ 1.5923444 sec
RG 114
DW 60.800 usec
DE 5.50 usec
TE 296.0 K
D1 1.0000000 sec
TDO 1
***** CHANNEL f1 *****
NUC1 1H
P1 14.00 usec
PL1 -1.00 dB
PL1W 13.56617069 W
SFO1 400.1924713 MHz
SI 32768
SF 400.1900150 MHz
WDW EM
SSB 0
LB 0.30 Hz
GB 0
PC 1.00
```

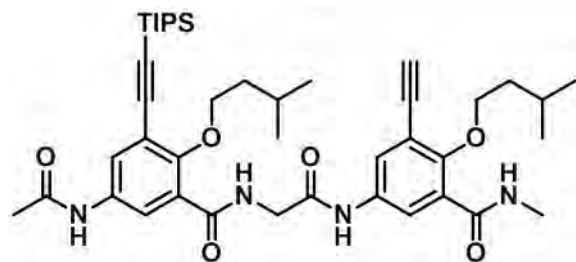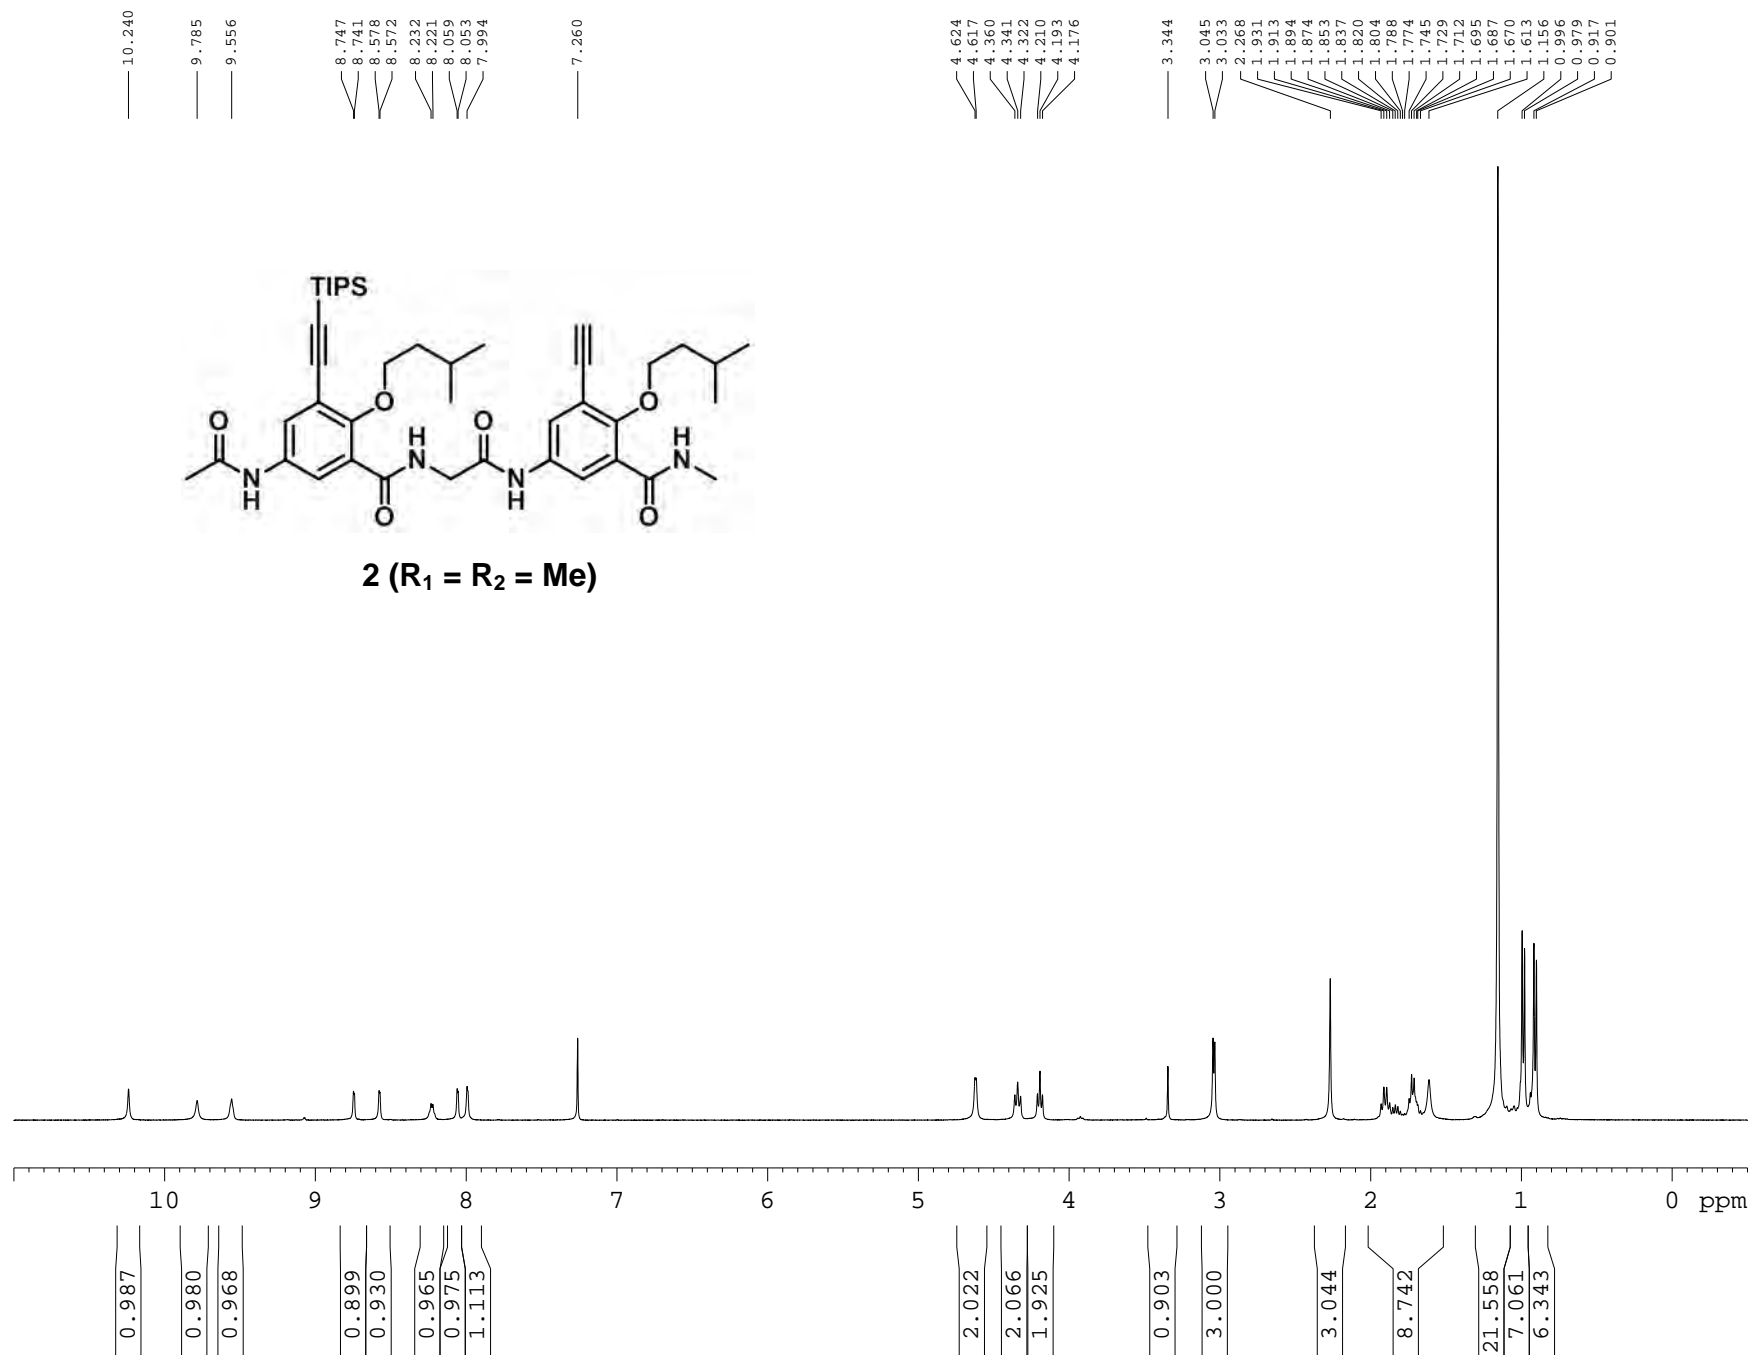





```
NAME Sun-30042014-(TIPS,CCH)-C1-C1
EXPNO 3
PROCNO 1
Data_ 20140430
Time 20.38
INSTRUM spect
PROBHD 5 mm PABBO BB-
PULPROG zgpg30
TD 65536
SOLVENT CDCl3
NS 1147
DS 4
SWH 24038.461 Hz
FIDRES 0.366798 Hz
AQ 1.353388 sec
RG 161
DM 20.800 usec
DE 6.50 usec
TE 296.8 K
D1 2.0000000 sec
D11 0.0300000 sec
TDO 1
===== CHANNEL f1 =====
NUC1 13C
P1 9.90 usec
PL1 -2.00 dB
PL1W 55.33689499 W
SFO1 100.6379183 MHz
===== CHANNEL f2 =====
CPDPRG2 waltz16
NUC2 1H
PCPD2 90.00 usec
PL2 -1.00 dB
PL12 15.16 dB
PL13 18.62 dB
PL2W 13.56617059 W
PL1W 0.32841096 W
PL13W 0.14806664 W
SFO2 400.1516008 MHz
SI 32768
SF 100.6278446 MHz
WDM RM
SSB 0
LB 1.00 Hz
GB 0
PC 1.40
```

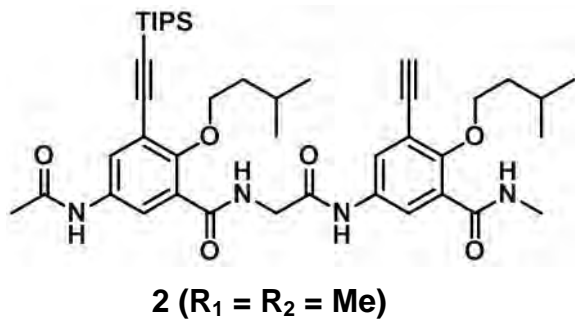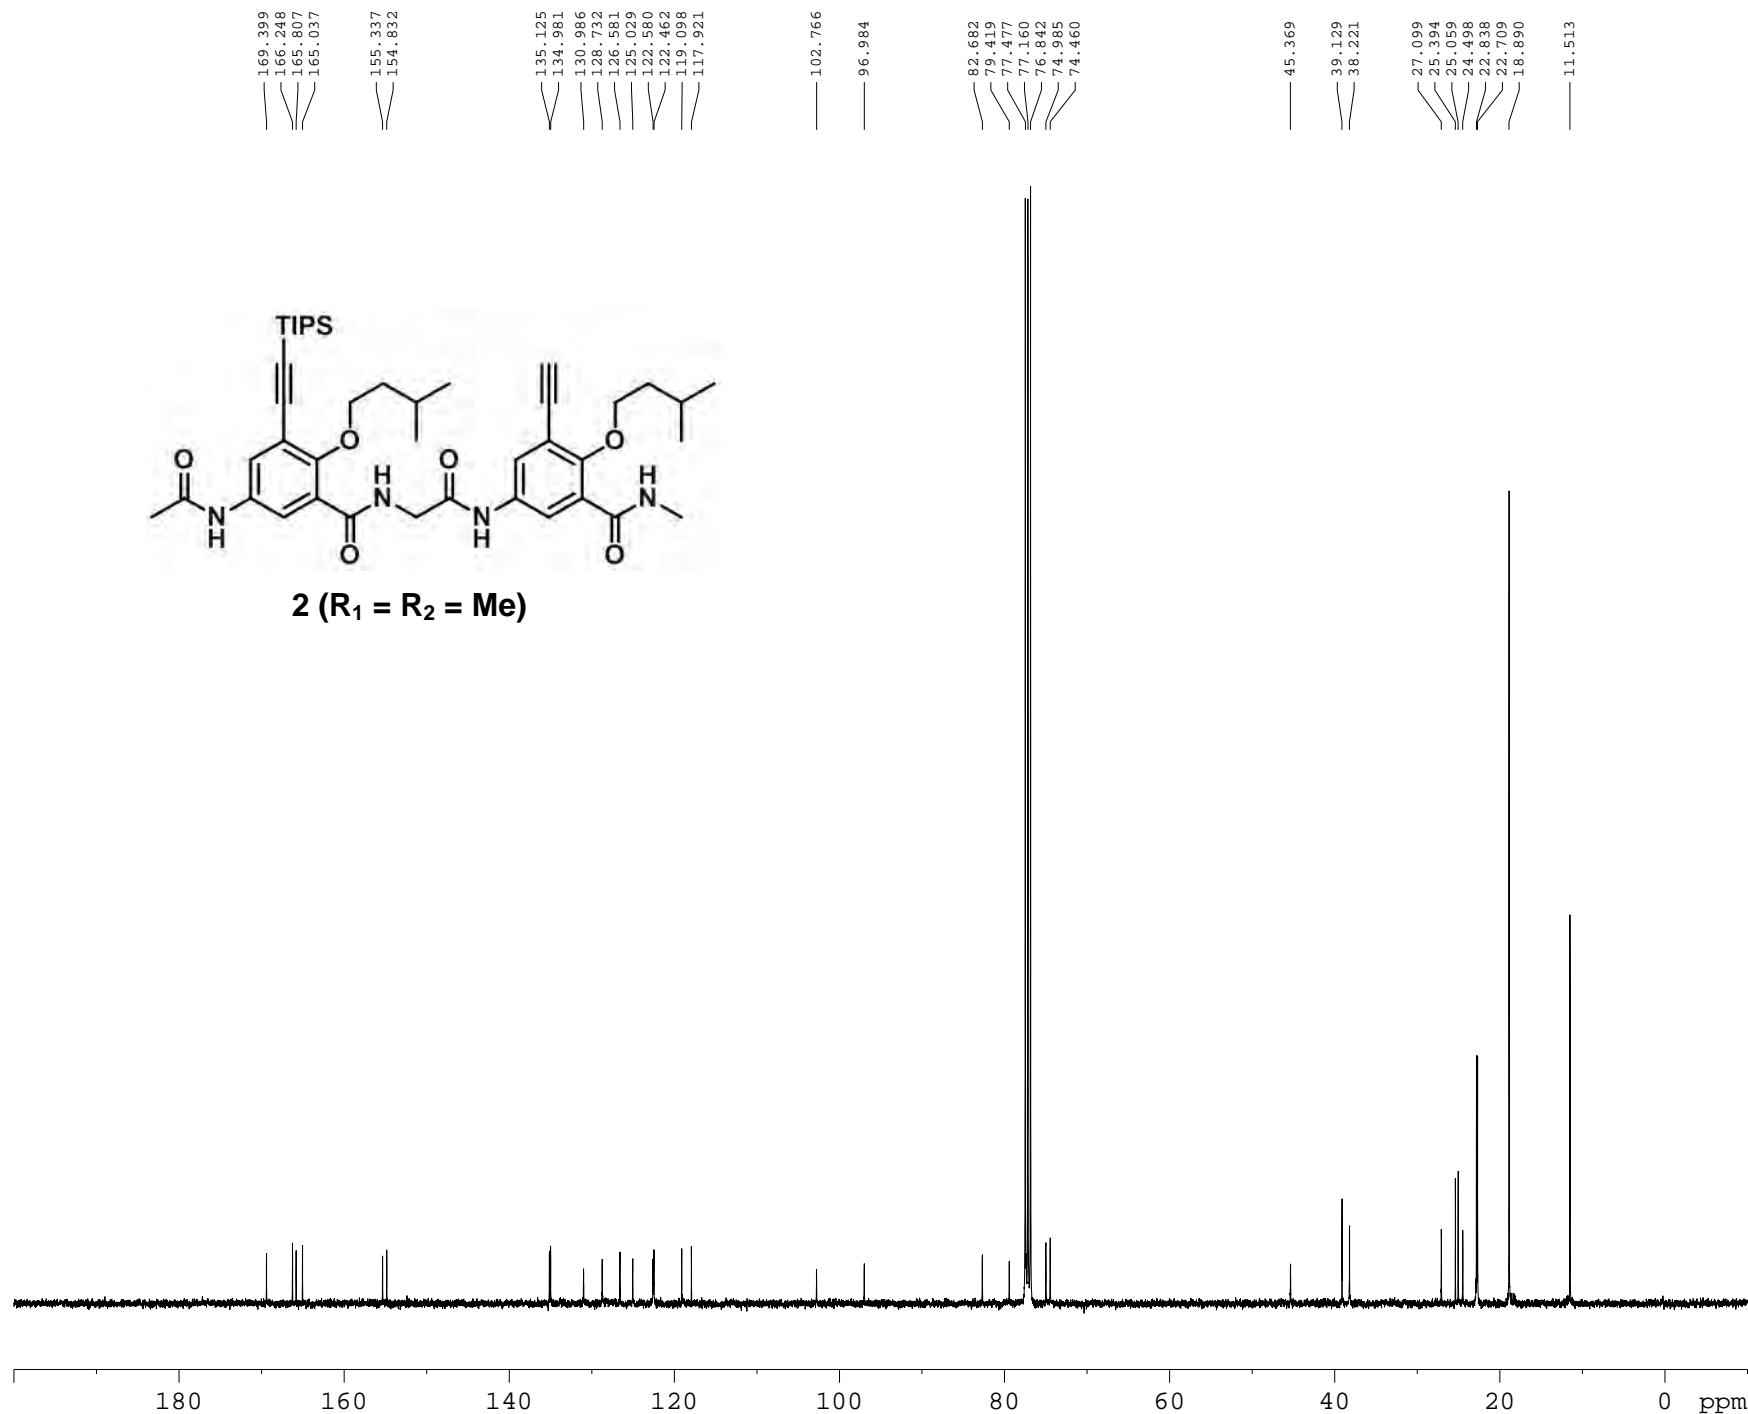

hfc1997 #2-4 RT: 0.26-0.44 AV: 3 SM: 5G NL: 8.91E5  
T: + p ESI Full ms [ 99.50-2000.50]

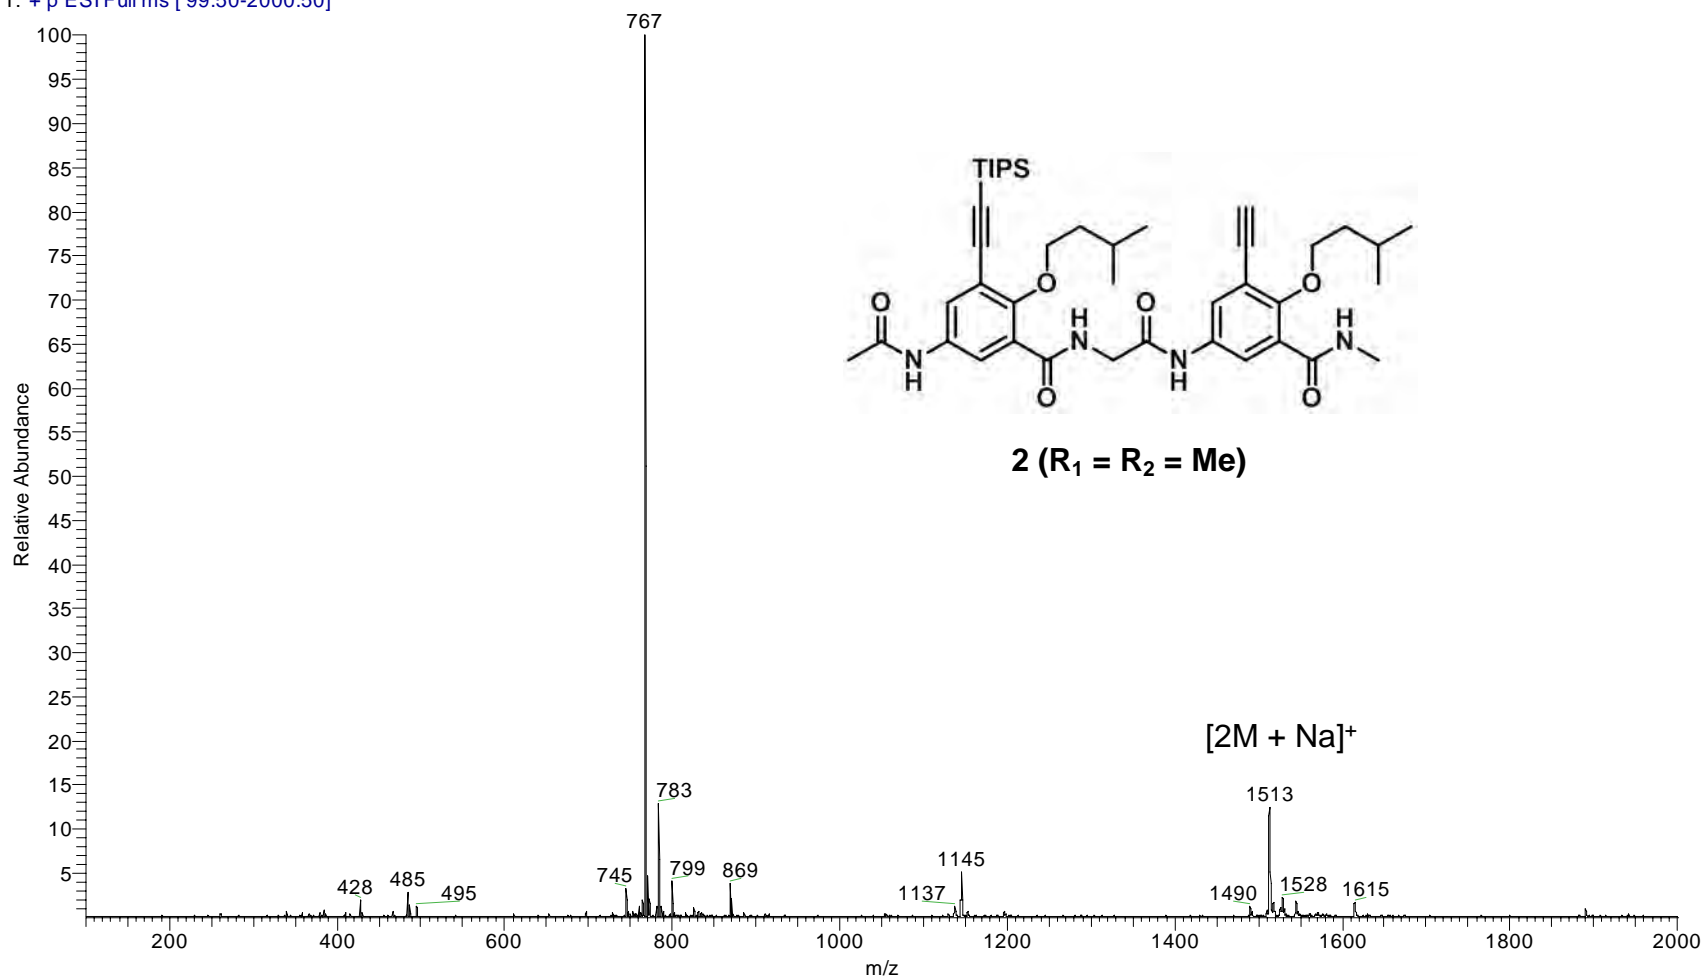



```
NAME Sun-21012014-(TIPS,CC)-C9-C812
EXPRO 1
PROCNO 20140121
Date_ 23.23
Time 23.23
INSTRUM spect
PROBHD 5 mm PABBO BB-
PULPROG zg30
TD 32768
SOLVENT MeOD
NS 16
DS 2
SWH 8223.685 Hz
FIDRES 0.250967 Hz
AQ 1.9923444 sec
RG 25.4
DW 60.800 usec
DE 6.50 usec
TE 296.4 K
D1 1.00000000 sec
TDO 1
===== CHANNEL f1 =====
NUC1 1H
P1 14.00 usec
PL1 -1.00 dB
SFLN 13.56617069 W
SFO1 400.1898686 MHz
SI 32768
SF 400.18984016 MHz
WDW EM
SSB 0
LB 0.30 Hz
GB 0
PC 1.00
```

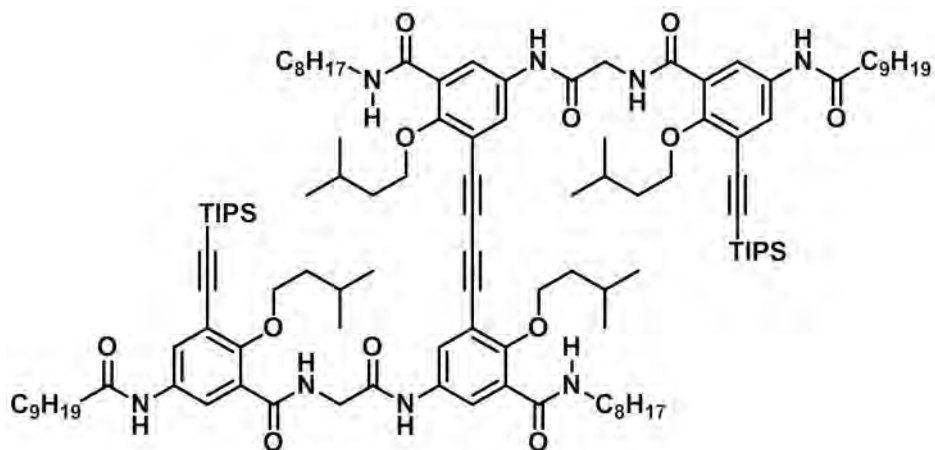

26

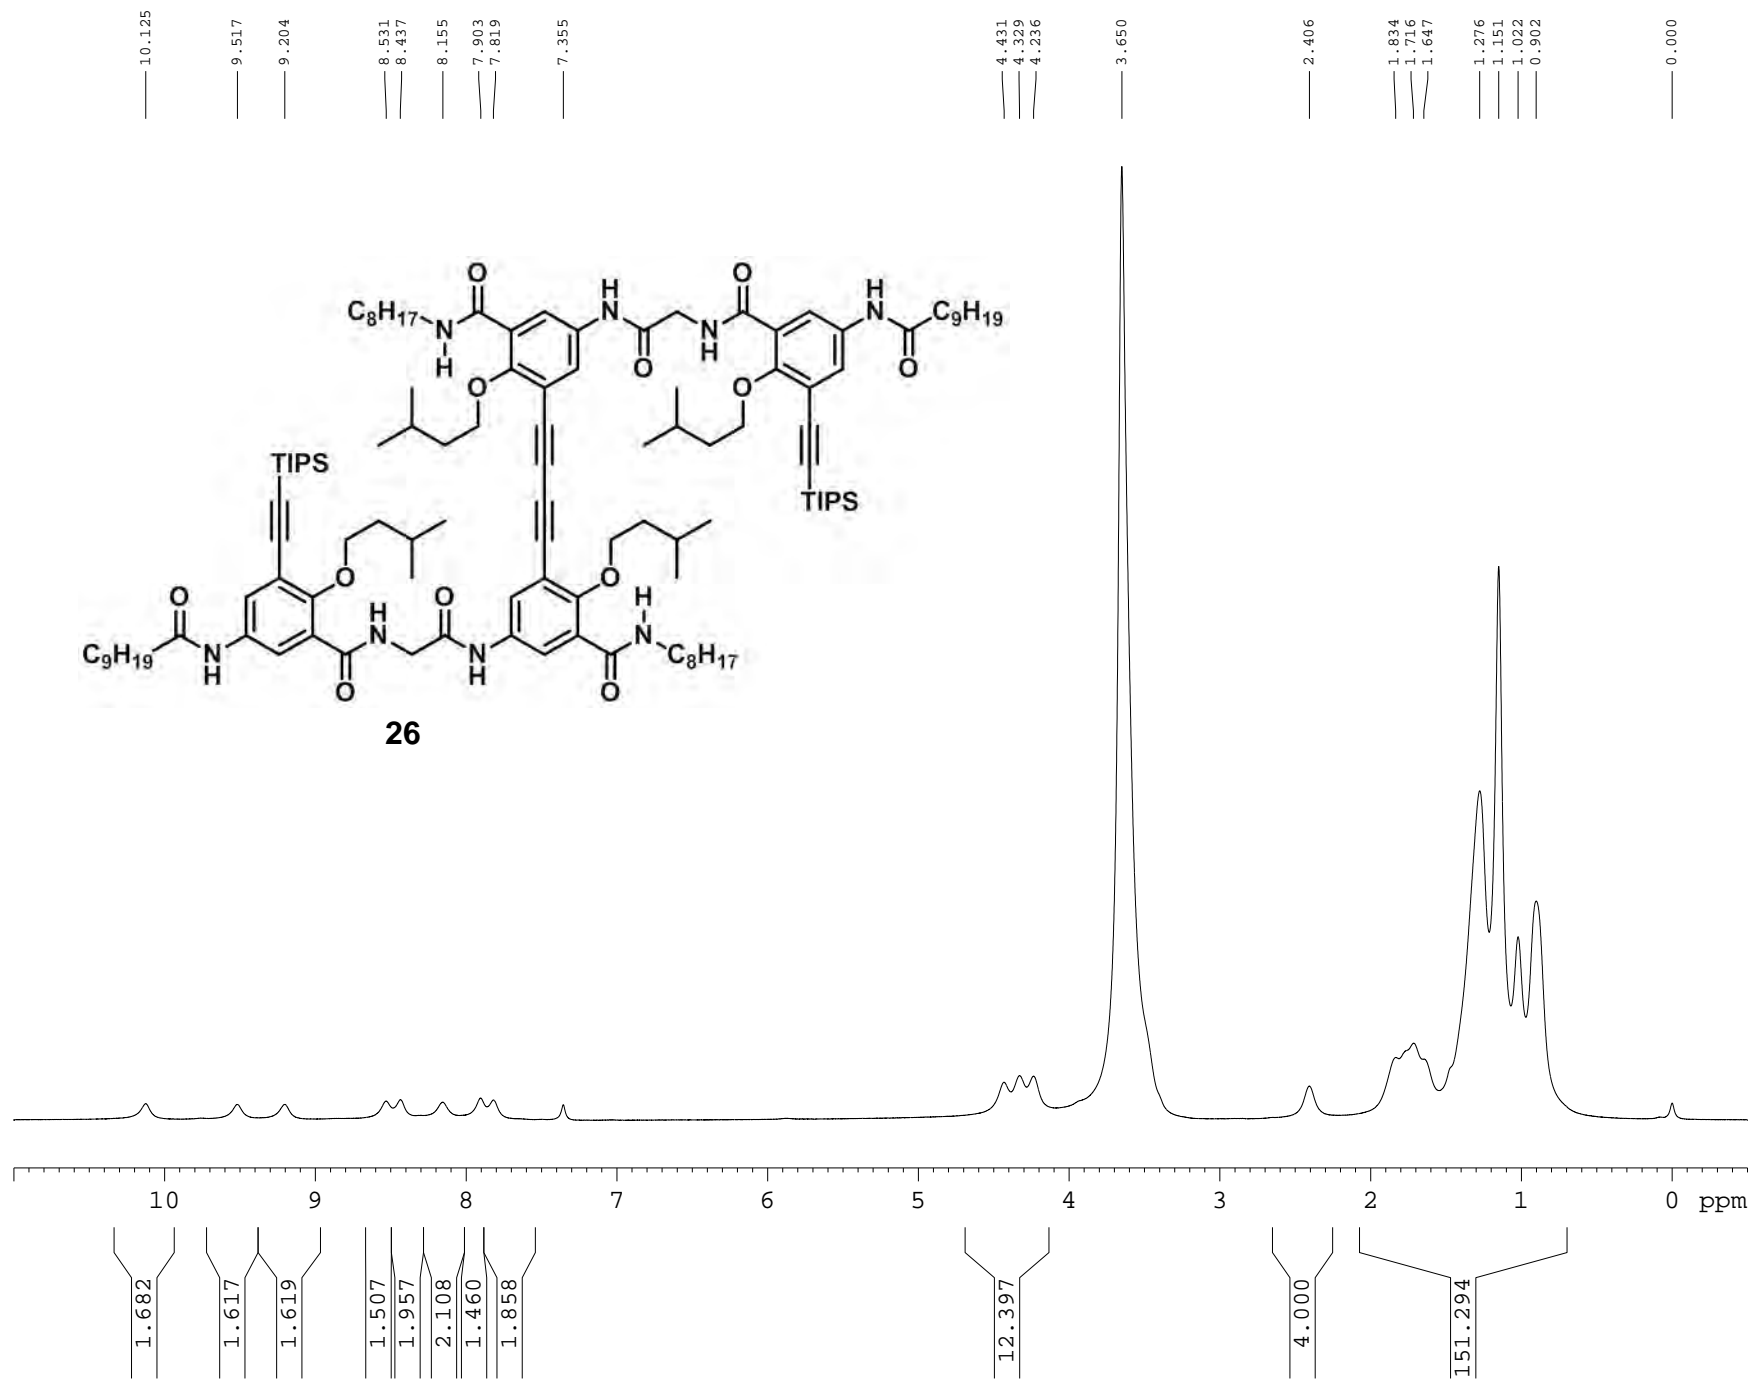

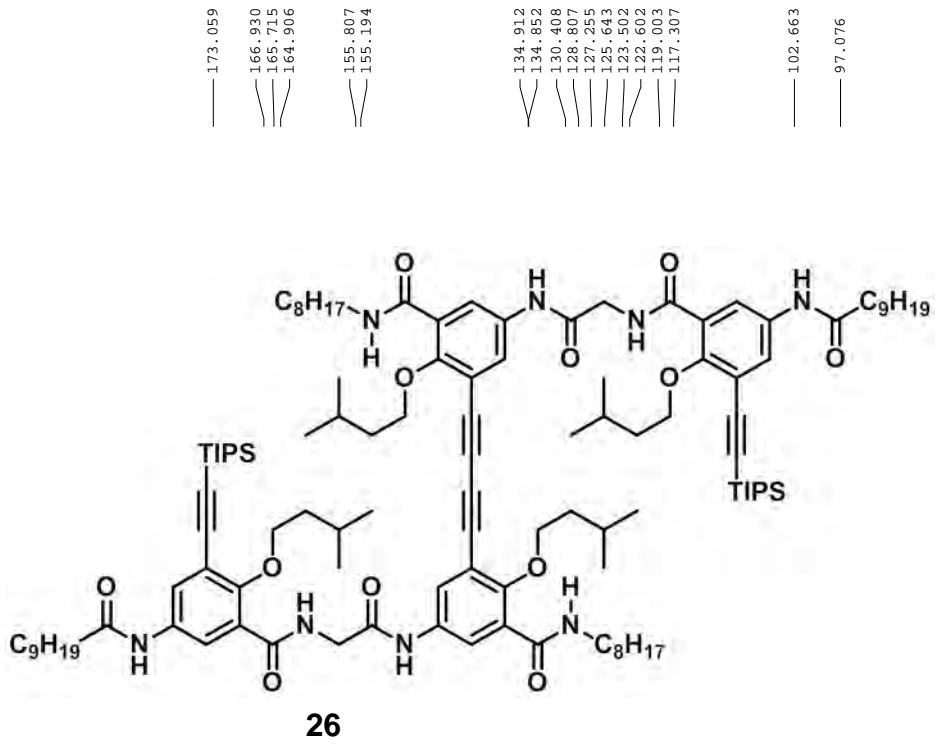

- 173.059
- 166.930
- 165.715
- 164.306
- 155.807
- 155.194
- 134.912
- 134.852
- 130.408
- 128.807
- 127.255
- 125.643
- 123.502
- 122.602
- 119.003
- 117.307
- 102.663
- 97.076
- 78.698
- 78.591
- 77.649
- 77.330
- 77.011
- 75.028
- 74.887
- 50.018
- 49.802
- 49.589
- 49.376
- 49.162
- 48.948
- 48.735
- 44.651
- 40.361
- 39.223
- 38.478
- 37.408
- 31.990
- 31.931
- 29.583
- 29.486
- 29.455
- 29.402
- 29.327
- 27.308
- 25.751
- 25.392
- 25.205
- 22.781
- 22.749
- 18.790
- 14.098
- 11.527
- 0.000

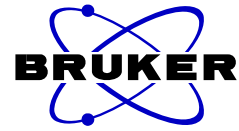

```

NAME      Sun-21012014-(TIPS,CC)-C9-C812
EXPNO     5
PROCNO    1
DATE_     20140121
Time      23.42
INSTRUM   spect
PROBHD    5 mm PABBO BB-
PULPROG   zgpg30
TD         65536
SOLVENT   MeOD
NS         10558
DS         4
SWH        24038.461 Hz
FIDRES     0.366798 Hz
AQ         1.3631988 sec
RG         256
DW         20.800 usec
DE         6.50 usec
TE         308.4 K
D1         2.00000000 sec
D11        0.03000000 sec
TDO        1

***** CHANNEL f1 *****
NUC1       13C
P1         9.90 usec
PL1        -2.00 dB
PL1W       55.33689499 W
SFO1       100.6279183 MHz

***** CHANNEL f2 *****
CFOPRG2    waltz16
NUC2       1H
PCPD2      90.00 usec
PL2        -1.00 dB
PL12       15.16 dB
PL13       18.62 dB
PL2W       13.56617069 W
PL12W      0.32844096 W
PL13W      0.14806564 W
SFO2       400.1916008 MHz
SI         32768
SF         100.6274354 MHz
WDW        EM
SSB        0
LB         1.00 Hz
GB         0
PC         1.40
  
```

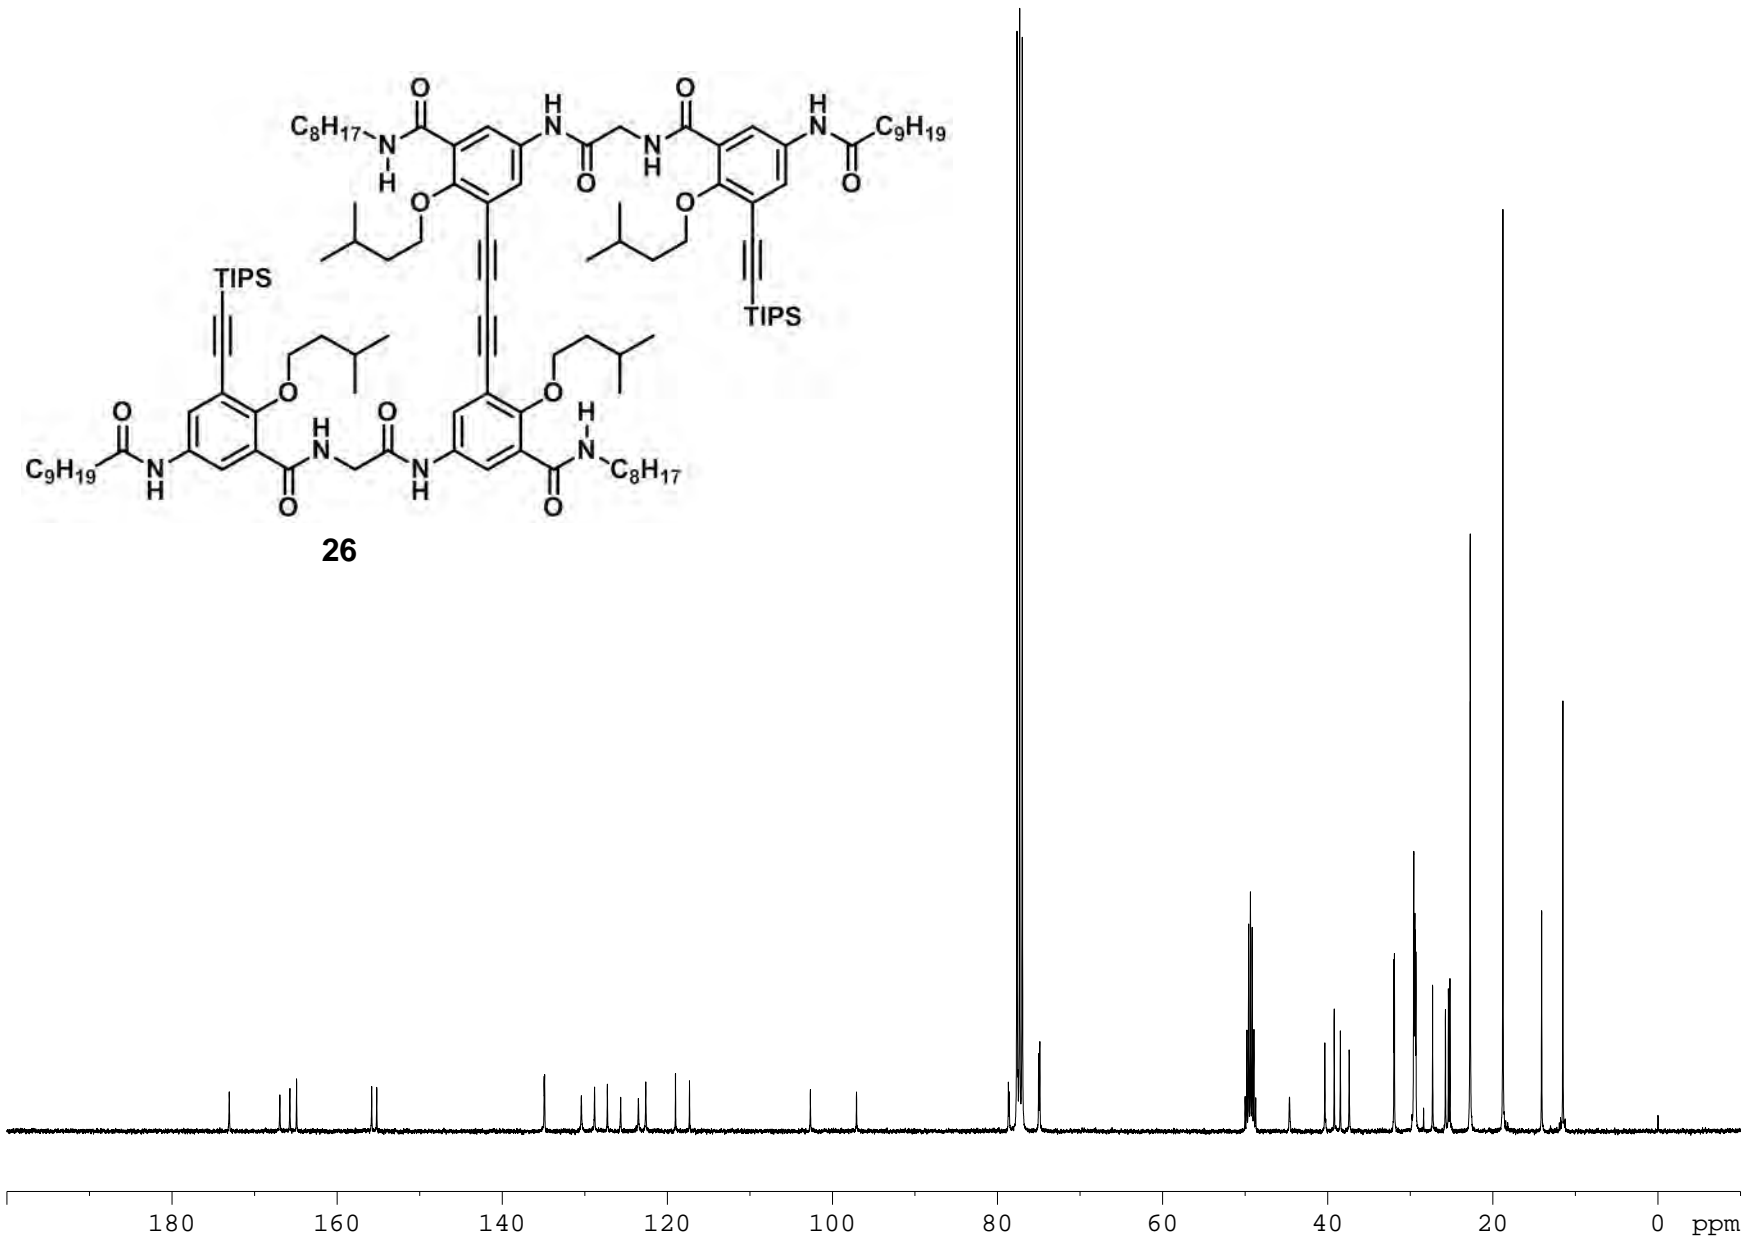

hfc2028\_131115152329 #2-12 RT: 0.23-1.12 AV: 11 SM: 5G NL: 4.11E4  
T: + p ESI Full ms [ 99.50-3000.50]

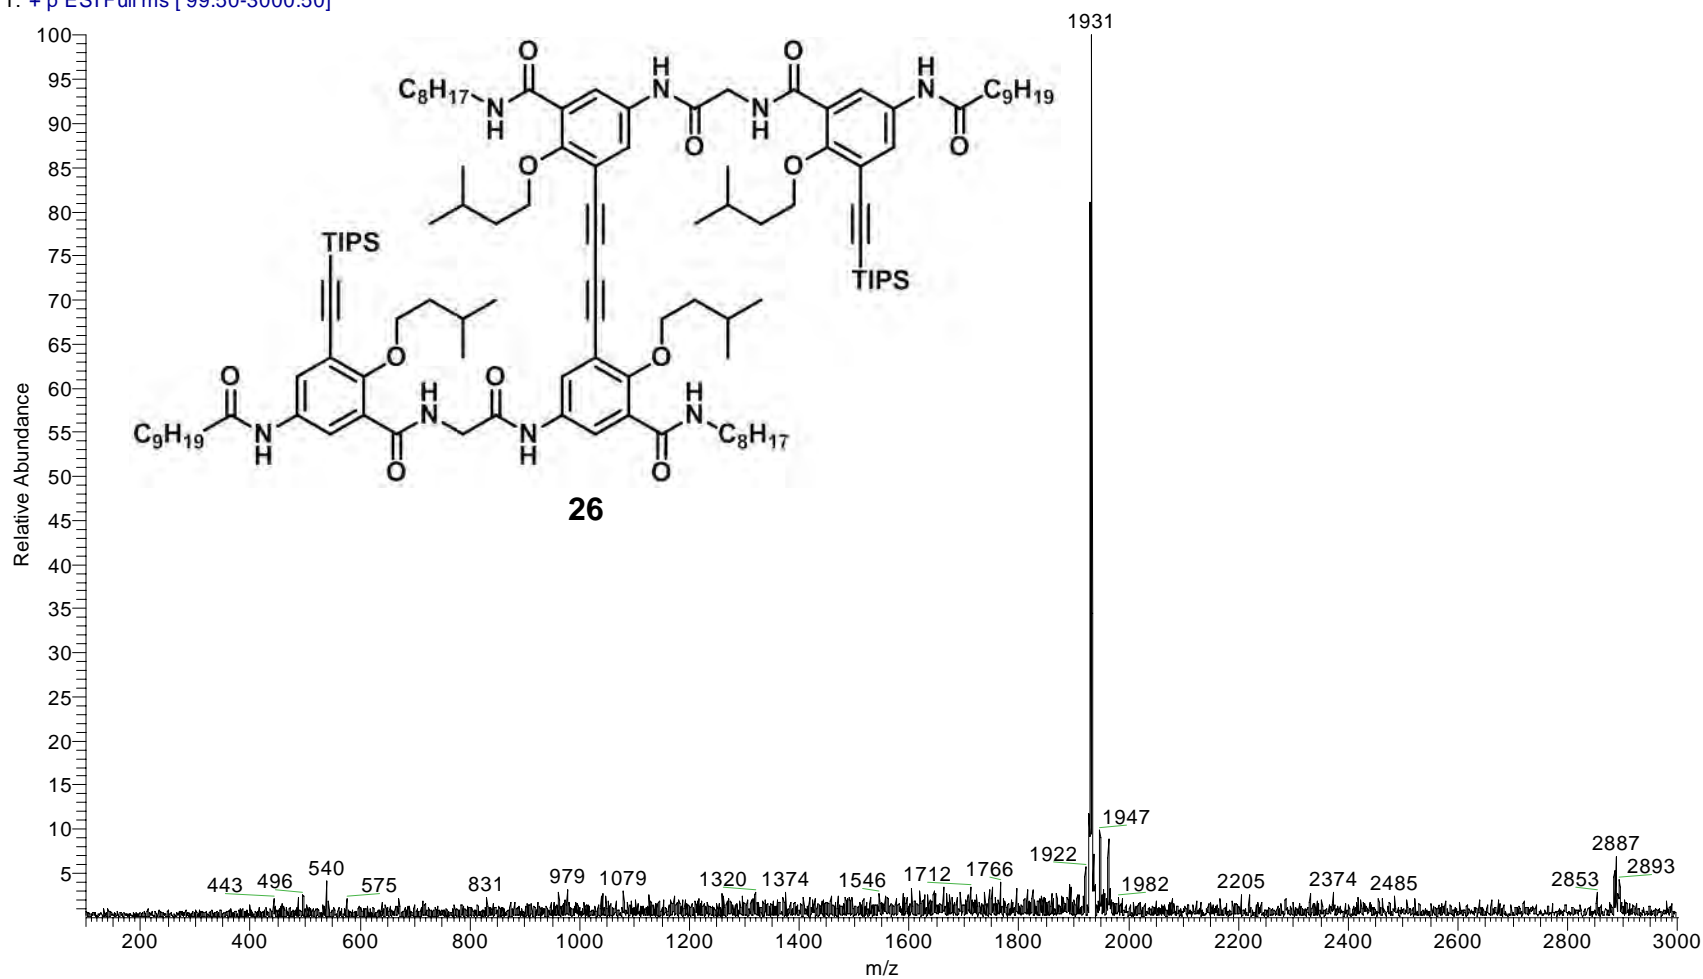



```
NAME Sun-17012014-(CCH,CC)-C9-C8)2
EXPNO 1
PROCNO 1
Date_ 20140117
Time 23.50
INSTRUM spect
PROBHD 5 mm PADUL 13C
PULPROG zg30
TD 65536
SOLVENT MeOD
NS 16
DS 2
SWH 8223.685 Hz
FIDRES 0.125483 Hz
AQ 3.5845387 sec
RG 57
DW 60.800 usec
DE 6.50 usec
TE 308.3 K
D1 1.0000000 sec
TDO 1
***** CHANNEL f1 *****
NUC1 1H
P1 14.83 usec
PL 0.00 dB
PL1W 8.31434441 W
SFO1 400.1324710 MHz
SI 32768
SF 400.1299757 MHz
WDW EM
SSB 0
LB 0.30 Hz
GB 0
PC 1.00
```

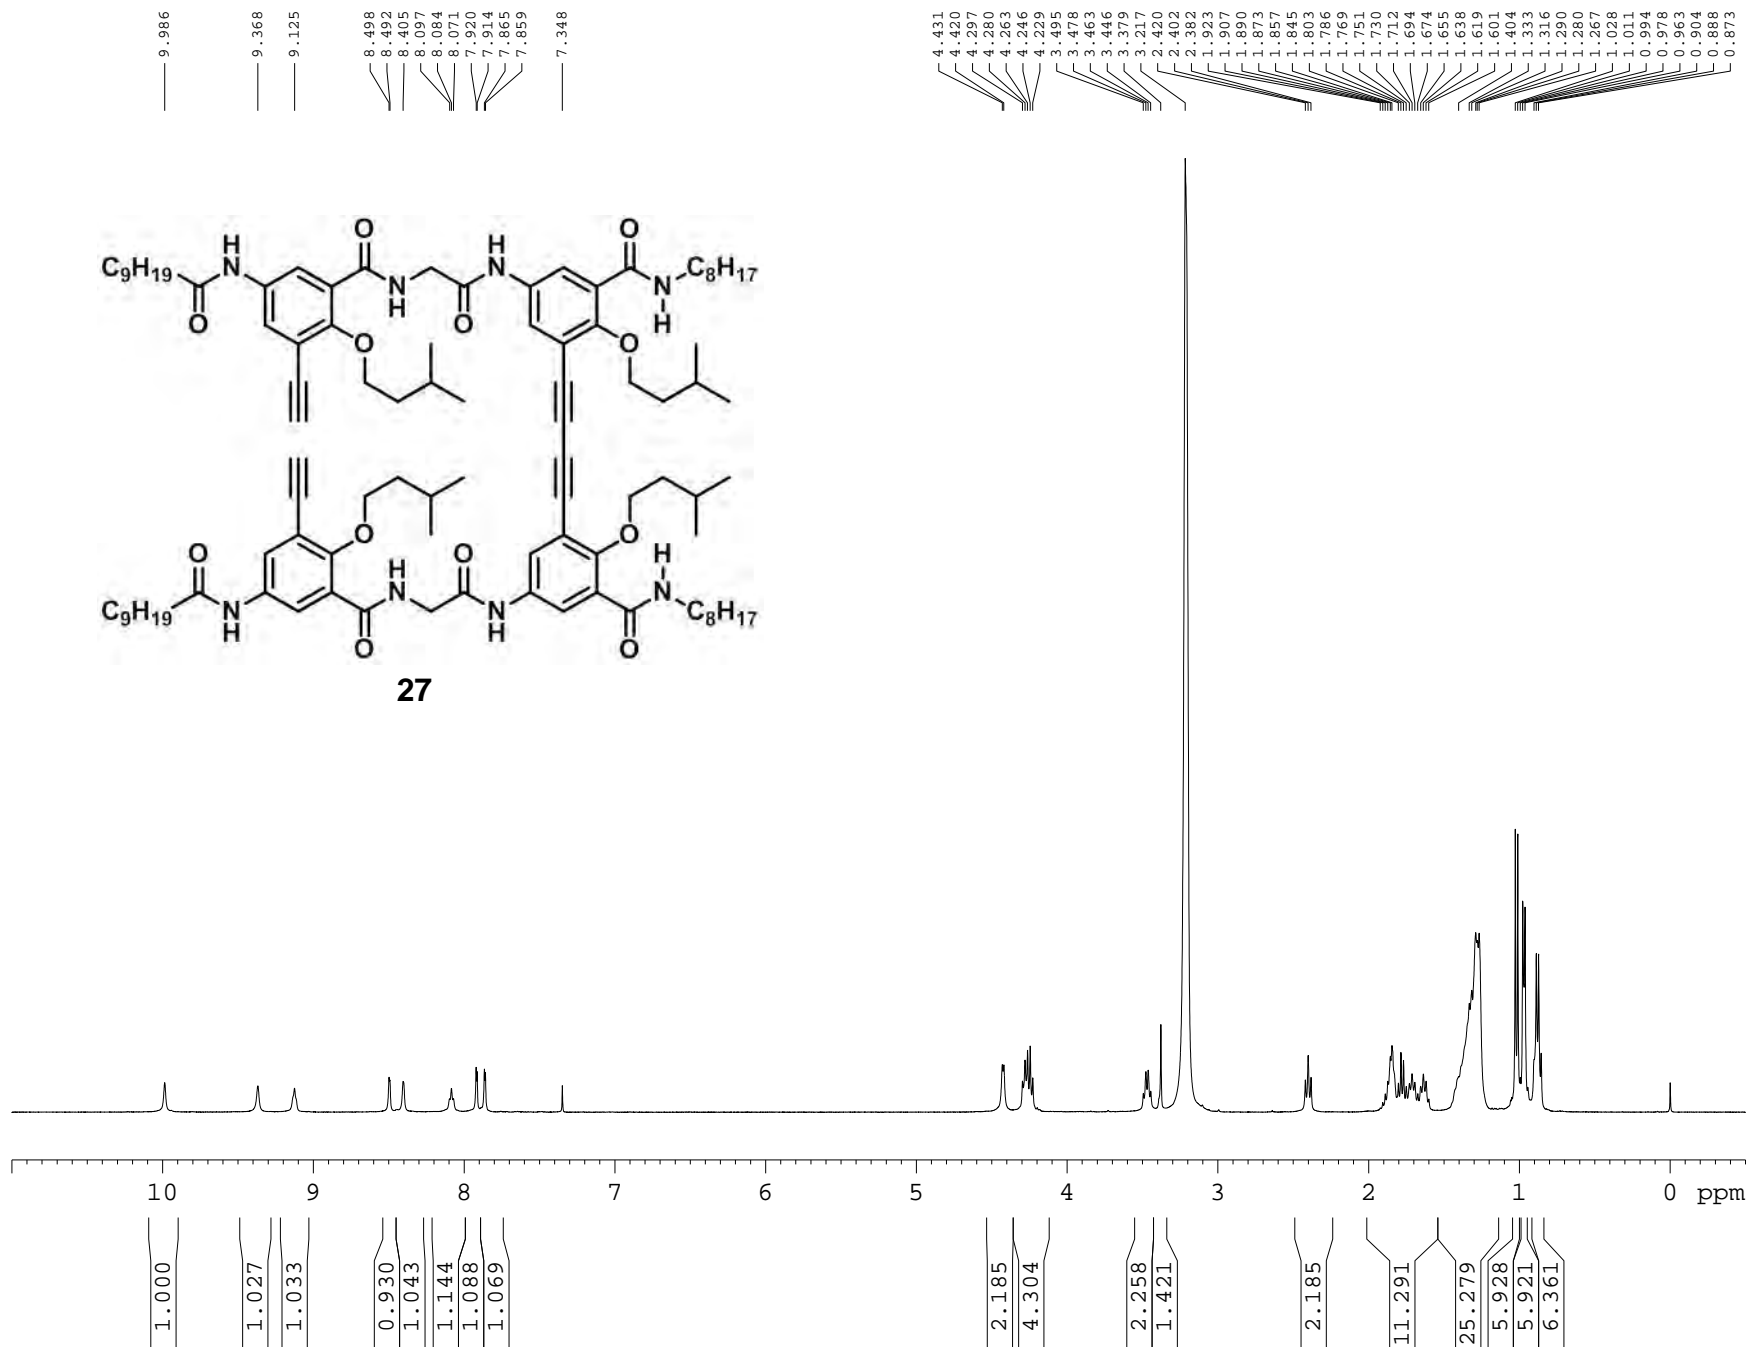

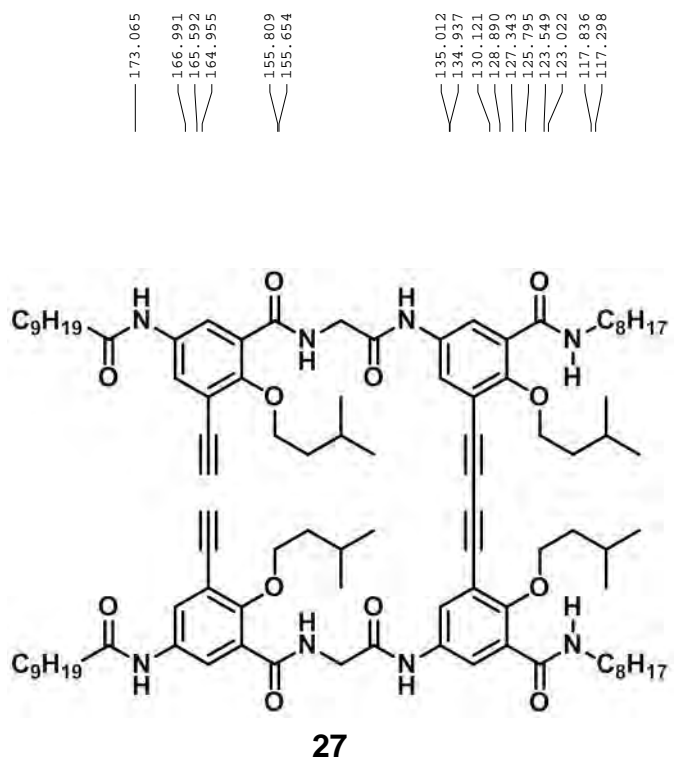

173.065  
 166.991  
 165.592  
 164.955  
 155.809  
 155.654  
 135.012  
 134.937  
 130.121  
 128.890  
 127.343  
 125.795  
 123.549  
 123.022  
 117.836  
 117.298  
 82.886  
 79.582  
 78.718  
 77.663  
 77.345  
 77.026  
 75.034  
 74.833  
 50.022  
 49.808  
 49.595  
 49.381  
 49.167  
 48.955  
 48.741  
 44.684  
 40.402  
 39.266  
 38.751  
 37.420  
 32.005  
 31.945  
 29.621  
 29.592  
 29.501  
 29.474  
 29.336  
 27.337  
 25.791  
 25.245  
 25.166  
 22.788  
 22.753  
 14.090  
 14.073  
 0.000



```

NAME Sun-17012014-(CCH,CC)-C9-C8)2
EXPNO 3
PROCNO 1
Date_ 20140117
Time 23.57
INSTRUM spect
PROBHD 5 mm PABUL 13C
PULPROG zgpg30
TD 65536
SOLVENT MeOD
NS 10713
DS 4
SWH 24038.461 Hz
FIDRES 0.366798 Hz
AQ 1.363388 sec
RG 203
DM 20.800 usec
DE 6.50 usec
TE 308.3 K
D1 2.0000000 sec
D11 0.0300000 sec
TDO 1

===== CHANNEL f1 =====
NUC1 13C
P1 9.68 usec
PL1 -0.60 dB
PL1W 41.24164963 W
SFO1 100.6228298 MHz

===== CHANNEL f2 =====
CPDPRG2 waltz16
NUC2 1H
PCPD2 90.00 usec
PL2 0.00 dB
PL12 15.66 dB
PL13 15.92 dB
PL2W 8.31434441 W
PL1W 0.22858411 W
PL13W 0.21272963 W
SFO2 400.1316005 MHz
SI 32768
SF 100.6127401 MHz
WDW EM
SSB 0
LB 1.00 Hz
GB 0
PC 1.40
  
```

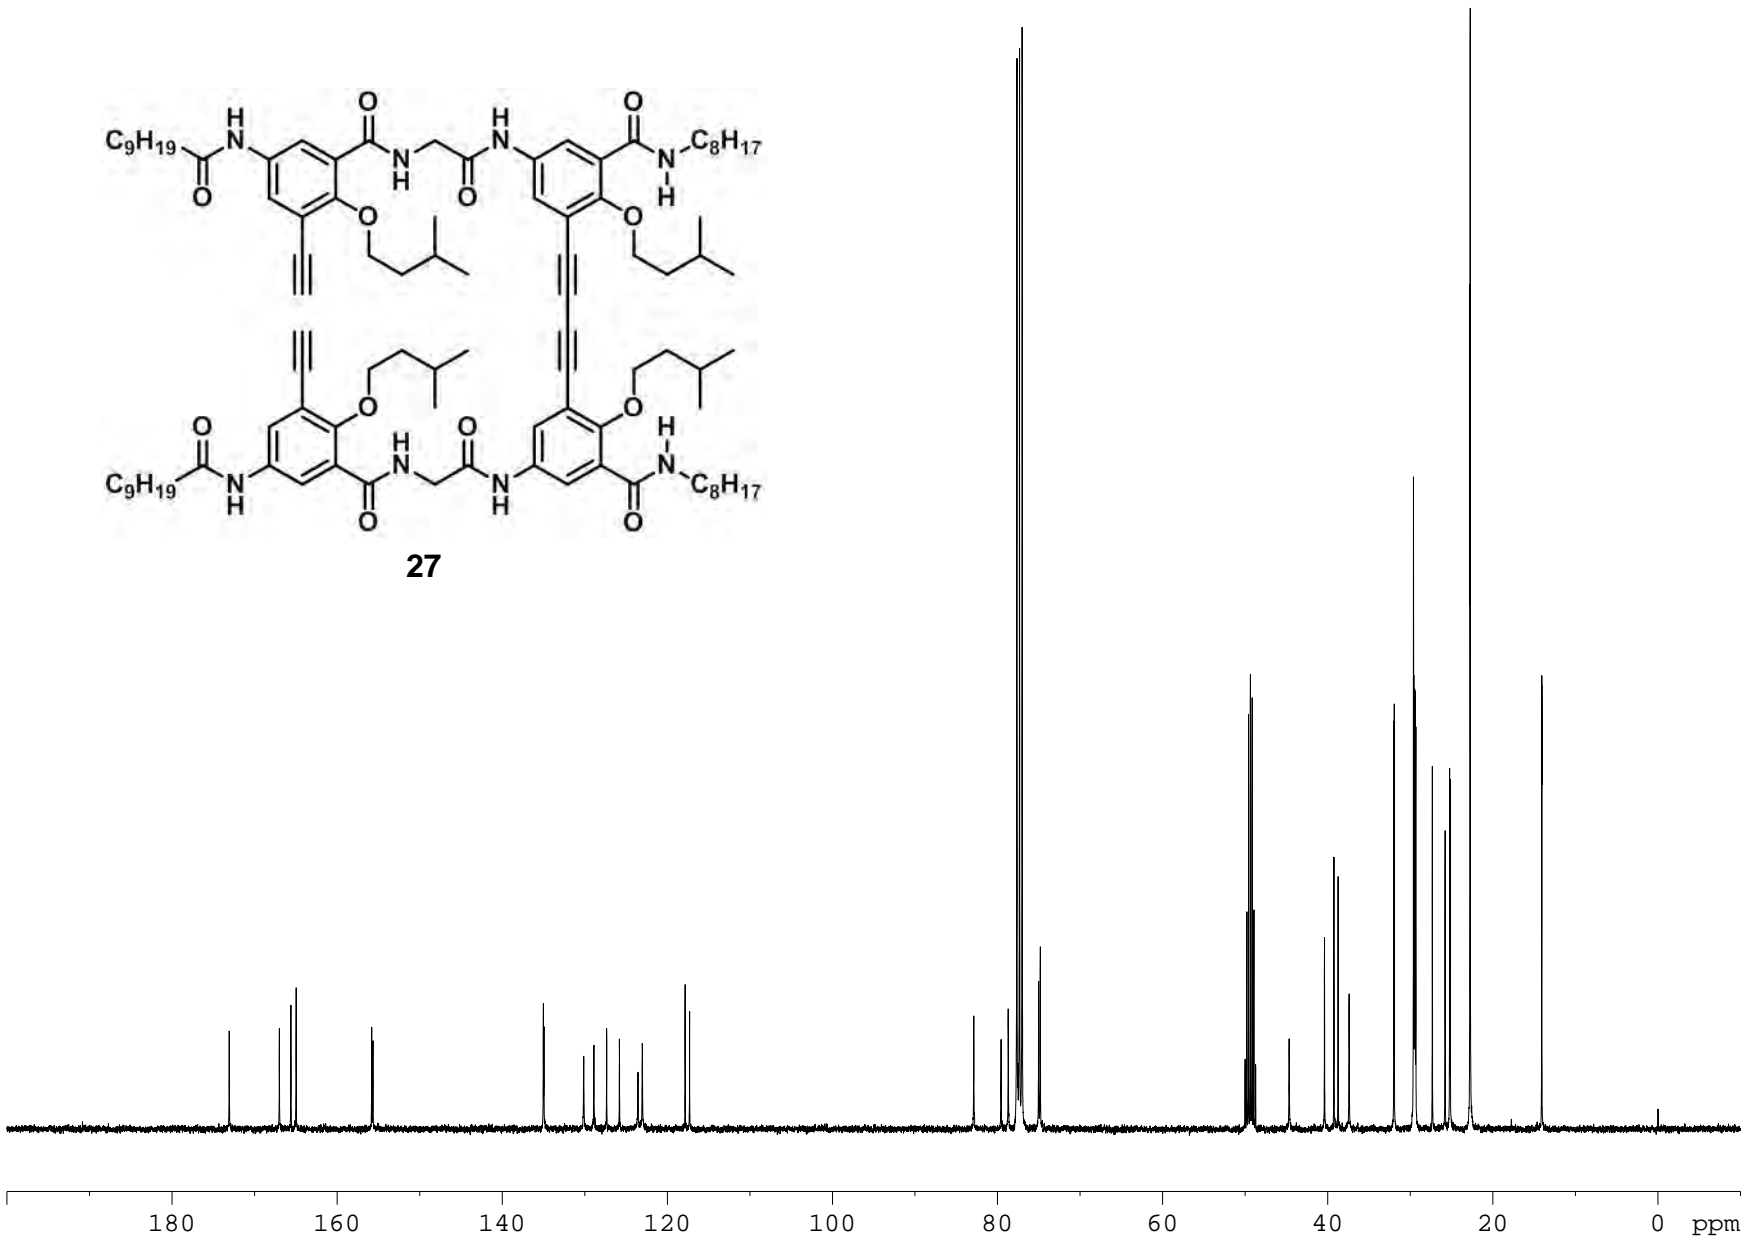

hfc2062 #1-9 RT: 0.16-0.87 AV: 9 SM: 5G NL: 3.70E5  
T: + p ESI Full ms [ 99.50-3000.50]

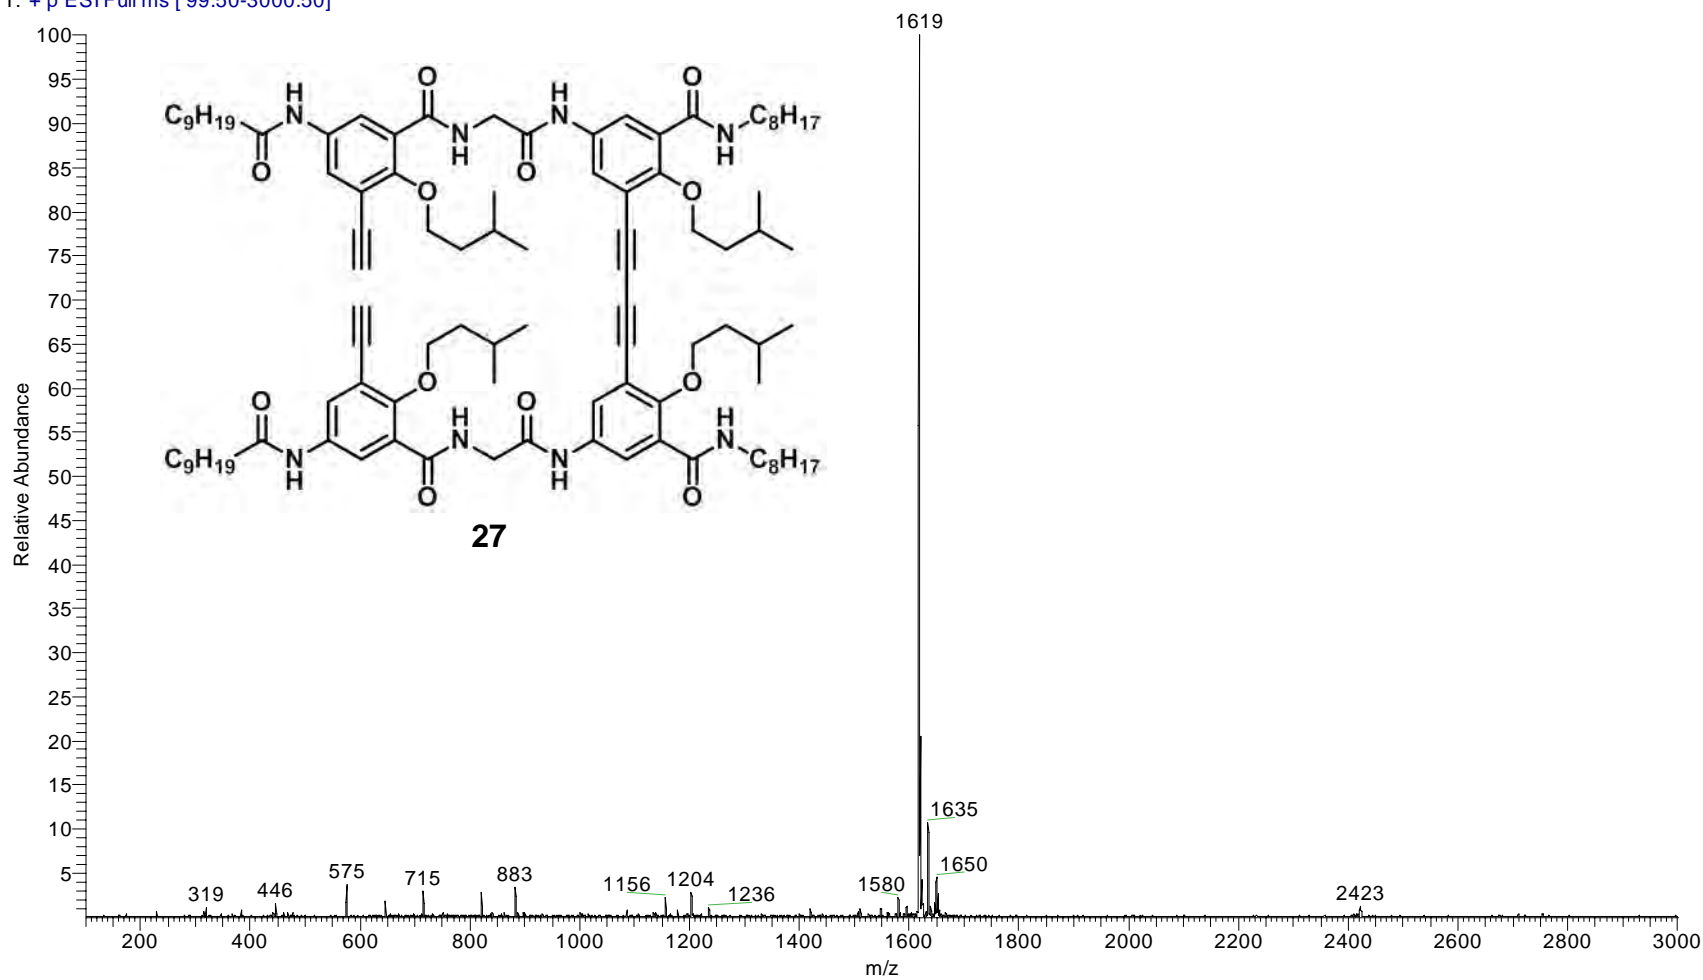

Supplement: c4cc08817d1.pdf [file c4cc08817d1.pdf]
